# Supplementary material
Source: publisher figshare collection journal article supplement (https://acs.figshare.com/ndownloader/files/8024996)
Supplement: Supplementary file 1 [file 8024996]

## Sheet: Description
Supplemental Table 6. A total of 1283 S-sulfenylated sites on 761 proteins identified by using multiple probe-labeling strategy. MS1 filtering-based quantification results were obtained from two biological replicates for each probe. A z-score was calculated for each modified peptide from the following formula. z = (X - μ) / σ where z is the z-score, X is the value of the element, μ is the populat…

## Sheet: Sheet1
ProteinName	Gene Symbol	ProteinDescription	PeptideSequence	PeptideModifiedSequence	PeptideModifiedSequence	PrecursorMz	PrecursorCharge	Site	AverageMeasuredRetentionTime	MeanTotalArea	z-score normalization	Probe
NP_775083.1|	CAST	|CAST|831|G5E946;Q86YM9|calpastatin isoform b [Homo sapiens]	AAAPAPVSEAVCR	AAAPAPVSEAVC[+418.1]R	AAAPAPVSEAVC#R	830.385	2	C386	61.99	698011648	-0.0218166	BTD
NP_001307.2|	CSE1L	|CSE1L|1434|P55060|exportin-2 isoform 1 [Homo sapiens]	AACDLVR	AAC[+418.1]DLVR	AAC#DLVR	583.26	2	C387	61.36	1186962592	0.209781	BTD
NP_006800.2|	TOMM34	|TOMM34|10953|Q15785|mitochondrial import receptor subunit TOM34 [Homo sapiens]	AACHLK	AAC[+418.1]HLK	AAC#HLK	354.162	3	C60	46.89	528673024	-0.102026	BTD
NP_002289.2|	LCP1	|LCP1|3936|P13796|plastin-2 [Homo sapiens]	AACLPLPGYR	AAC[+418.1]LPLPGYR	AAC#LPLPGYR	739.85	2	C42	74.37	980333600	0.111909	BTD
NP_002289.2|	LCP1	|LCP1|3936|P13796|plastin-2 [Homo sapiens]	AACLPLPGYR	AAC[+418.1]LPLPGYR	AAC#LPLPGYR	493.569	3	C42	74.37	287973696	-0.216036	BTD
NP_006810.1|	STIP1	|STIP1|10963|P31948|stress-induced-phosphoprotein 1 [Homo sapiens]	AACYTK	AAC[+418.1]YTK	AAC#YTK	537.723	2	C403	50.55	370377664	-0.177004	BTD
NP_006176.2|	NUMA1	|NUMA1|4926|Q14980;Q3SYK8;Q4LE64|nuclear mitotic apparatus protein 1 [Homo sapiens]	AADALEEQQRCISELK	AADALEEQQRC[+418.1]ISELK	AADALEEQQRC#ISELK	741.345	3	C735	68.05	136416172	-0.287823	BTD
NP_001138632.1|	TPM4	|TPM4|7171|P67936|tropomyosin alpha-4 chain isoform 1 [Homo sapiens]	AAEDKCK	AAEDKC[+418.1]K	AAEDKC#K	591.75	2	C36	36.49	200779576	-0.257337	BTD
NP_001138632.1|	TPM4	|TPM4|7171|P67936|tropomyosin alpha-4 chain isoform 1 [Homo sapiens]	AAEDKCK	AAEDKC[+418.1]K	AAEDKC#K	394.835	3	C36	36.49	289727232	-0.215206	BTD
NP_005827.1|	HRSP12	|HRSP12|10247|P52758;Q6IBG0|ribonuclease UK114 [Homo sapiens]	AAGCDFTNVVK	AAGC[+418.1]DFTNVVK	AAGC#DFTNVVK	771.839	2	C71	67	186859336	-0.26393	BTD
NP_000662.3|	ADH5	|ADH5|128|P11766;Q6IRT1|alcohol dehydrogenase class-3 [Homo sapiens]	AALEACHK	AALEAC[+418.1]HK	AALEAC#HK	630.779	2	C282	47.6	274339768	-0.222494	BTD
NP_005403.2|	SHMT2	|SHMT2|6472|P34897;Q5BJF5|serine hydroxymethyltransferase, mitochondrial isoform 1 precursor [Homo sapiens]	AALEALGSCLNNK	AALEALGSC[+418.1]LNNK	AALEALGSC#LNNK	861.403	2	C91	72.45	145522928	-0.28351	BTD
NP_005403.2|	SHMT2	|SHMT2|6472|P34897;Q5BJF5|serine hydroxymethyltransferase, mitochondrial isoform 1 precursor [Homo sapiens]	AALEALGSCLNNK	AALEALGSC[+418.1]LNNK	AALEALGSC#LNNK	574.604	3	C91	72.45	82167432	-0.313519	BTD
NP_004095.4|	FASN	|FASN|2194|P49327|fatty acid synthase [Homo sapiens]	AALQEELQLCK	AALQEELQLC[+418.1]K	AALQEELQLC#K	555.265	3	C1141	72.74	108165248	-0.301205	BTD
NP_671717.1|	FBXO22	|FBXO22|26263|Q8NEZ5|F-box only protein 22 isoform a [Homo sapiens]	AANIPEHNTIGFMFACVGR	AANIPEHNTIGFM[+16]FAC[+418.1]VGR	AANIPEHNTIGFMFAC#VGR	828.042	3	C326	72.82	432435424	-0.14761	BTD
NP_001596.2|	AARS	|AARS|16|P49588|alanine--tRNA ligase, cytoplasmic [Homo sapiens]	AANTQKCIR	AANTQKC[+418.1]IR	AANTQKC#IR	711.834	2	C75	45.04	296112760	-0.212181	BTD
NP_055994.2|	RRP12	|RRP12|23223|Q5JTH9;B3KMR5|RRP12-like protein isoform 1 [Homo sapiens]	AAQHGVCSVLK	AAQHGVC[+418.1]SVLK	AAQHGVC#SVLK	765.863	2	C261	56.55	489249344	-0.120699	BTD
NP_055994.2|	RRP12	|RRP12|23223|Q5JTH9;B3KMR5|RRP12-like protein isoform 1 [Homo sapiens]	AAQHGVCSVLK	AAQHGVC[+418.1]SVLK	AAQHGVC#SVLK	510.911	3	C261	56.55	726391488	-0.0083741	BTD
NP_056991.2|	LAP3	|LAP3|51056|P28838|cytosol aminopeptidase [Homo sapiens]	AAVAAGCR	AAVAAGC[+418.1]R	AAVAAGC#R	568.752	2	C129	50.44	364854208	-0.179621	BTD
NP_002147.2|	HSPD1	|HSPD1|3329|P10809|60 kDa heat shock protein, mitochondrial [Homo sapiens]	AAVEEGIVLGGGCALLR	AAVEEGIVLGGGC[+418.1]ALLR	AAVEEGIVLGGGC#ALLR	1023.51	2	C442	82.66	18808911872	8.55664	BTD
NP_002147.2|	HSPD1	|HSPD1|3329|P10809|60 kDa heat shock protein, mitochondrial [Homo sapiens]	AAVEEGIVLGGGCALLR	AAVEEGIVLGGGC[+418.1]ALLR	AAVEEGIVLGGGC#ALLR	682.676	3	C442	82.66	46901164032	21.8629	BTD
NP_001153706.1|	ATP1A1	|ATP1A1|476|P05023;B7Z3U6|sodium/potassium-transporting ATPase subunit alpha-1 isoform d [Homo sapiens]	AAVPDAVGKCR	AAVPDAVGKC[+418.1]R	AAVPDAVGKC#R	752.855	2	C575	51.76	144582816	-0.283955	BTD
NP_001153706.1|	ATP1A1	|ATP1A1|476|P05023;B7Z3U6|sodium/potassium-transporting ATPase subunit alpha-1 isoform d [Homo sapiens]	AAVPDAVGKCR	AAVPDAVGKC[+418.1]R	AAVPDAVGKC#R	502.239	3	C575	51.76	720093280	-0.0113573	BTD
NP_068598.1|	FASTKD5	|FASTKD5|60493|Q7L8L6|FAST kinase domain-containing protein 5 [Homo sapiens]	AAVPLGGFLCNVADK	AAVPLGGFLC[+418.1]NVADK	AAVPLGGFLC#NVADK	631.639	3	C670	84.72	32498996	-0.337045	BTD
NP_006387.1|	SSSCA1	|SSSCA1|10534|O60232|Sjoegren syndrome/scleroderma autoantigen 1 [Homo sapiens]	ACAEALR	AC[+418.1]AEALR	AC#AEALR	576.252	2	C187	55.13	120102168	-0.295551	BTD
NP_000282.1|	PGK1	|PGK1|5230|P00558;A8K4W6|phosphoglycerate kinase 1 [Homo sapiens]	ACANPAAGSVILLENLR	AC[+418.1]ANPAAGSVILLENLR	AC#ANPAAGSVILLENLR	1065.53	2	C108	86.59	52300236	-0.327666	BTD
NP_000282.1|	PGK1	|PGK1|5230|P00558;A8K4W6|phosphoglycerate kinase 1 [Homo sapiens]	ACANPAAGSVILLENLR	AC[+418.1]ANPAAGSVILLENLR	AC#ANPAAGSVILLENLR	710.687	3	C108	86.59	128670476	-0.291492	BTD
NP_006139.1|	LASP1	|LASP1|3927|Q14847|LIM and SH3 domain protein 1 [Homo sapiens]	ACFHCETCK	AC[+418.1]FHC[+57]ETC[+57]K	AC#FHCETCK	787.288	2	C29	48.87	540508992	-0.0964197	BTD
NP_006139.1|	LASP1	|LASP1|3927|Q14847|LIM and SH3 domain protein 1 [Homo sapiens]	ACFHCETCK	AC[+418.1]FHC[+57]ETC[+57]K	AC#FHCETCK	525.195	3	C29	48.87	3319245056	1.21976	BTD
NP_055791.1|	PDCD11	|PDCD11|22984|Q14690|protein RRP5 homolog [Homo sapiens]	ACILCVHPR	AC[+418.1]ILC[+57]VHPR	AC#ILCVHPR	743.841	2	C330	68.04	114736064	-0.298092	BTD
NP_057535.1|	COPB1	|COPB1|1315|P53618|coatomer subunit beta [Homo sapiens]	ACLEHR	AC[+418.1]LEHR	AC#LEHR	573.745	2	C143	47.98	267337248	-0.225811	BTD
NP_057535.1|	COPB1	|COPB1|1315|P53618|coatomer subunit beta [Homo sapiens]	ACLEHR	AC[+418.1]LEHR	AC#LEHR	382.832	3	C143	47.98	679768960	-0.0304574	BTD
NP_002937.1|	RPA2	|RPA2|6118|P15927|replication protein A 32 kDa subunit [Homo sapiens]	ACPRPEGLNFQDLK	AC[+418.1]PRPEGLNFQDLK	AC#PRPEGLNFQDLK	669.313	3	C219	66.89	739405408	-0.0022099	BTD
NP_005959.2|	HNRNPM	|HNRNPM|4670|P52272|heterogeneous nuclear ribonucleoprotein M isoform a [Homo sapiens]	ACQIFVR	AC[+418.1]QIFVR	AC#QIFVR	627.792	2	C653	68.59	691142144	-0.0250704	BTD
NP_000997.1|	RPS3A	|RPS3A|6189|P61247|40S ribosomal protein S3a isoform 1 [Homo sapiens]	ACQSIYPLHDVFVR	AC[+418.1]QSIYPLHDVFVR	AC#QSIYPLHDVFVR	1033.48	2	C201	74.03	312266464	-0.20453	BTD
NP_000997.1|	RPS3A	|RPS3A|6189|P61247|40S ribosomal protein S3a isoform 1 [Homo sapiens]	ACQSIYPLHDVFVR	AC[+418.1]QSIYPLHDVFVR	AC#QSIYPLHDVFVR	689.326	3	C201	74.03	3942966912	1.5152	BTD
NP_002009.1|	FLII	|FLII|2314|Q13045|protein flightless-1 homolog isoform 1 [Homo sapiens]	ACQVYIQHMR	AC[+418.1]QVYIQHM[+16]R	AC#QVYIQHMR	561.579	3	C1224	52.61	512286112	-0.109788	BTD
NP_002009.1|	FLII	|FLII|2314|Q13045|protein flightless-1 homolog isoform 1 [Homo sapiens]	ACSAIHAVNLR	AC[+418.1]SAIHAVNLR	AC#SAIHAVNLR	524.919	3	C560	57.76	266573608	-0.226173	BTD
NP_009103.2|	NUP50	|NUP50|10762|Q9UKX7|nuclear pore complex protein Nup50 isoform b [Homo sapiens]	ACVGNAYHK	AC[+418.1]VGNAYHK	AC#VGNAYHK	690.795	2	C151	47.12	387905088	-0.168702	BTD
NP_009103.2|	NUP50	|NUP50|10762|Q9UKX7|nuclear pore complex protein Nup50 isoform b [Homo sapiens]	ACVGNAYHK	AC[+418.1]VGNAYHK	AC#VGNAYHK	460.866	3	C151	47.12	1601732416	0.406242	BTD
NP_057195.2|	TELO2	|TELO2|9894|Q9Y4R8;B4DXS2|telomere length regulation protein TEL2 homolog [Homo sapiens]	ACVHGR	AC[+418.1]VHGR	AC#VHGR	530.726	2	C222	39.75	216114096	-0.250073	BTD
NP_057195.2|	TELO2	|TELO2|9894|Q9Y4R8;B4DXS2|telomere length regulation protein TEL2 homolog [Homo sapiens]	ACVHGR	AC[+418.1]VHGR	AC#VHGR	354.153	3	C222	39.75	623750304	-0.0569914	BTD
NP_000261.2|	PNP	|PNP|4860|P00491|purine nucleoside phosphorylase [Homo sapiens]	ACVMMQGR	AC[+418.1]VM[+16]M[+16]QGR	AC#VMMQGR	673.261	2	C78	47.61	1581864832	0.396832	BTD
NP_001153706.1|	ATP1A1	|ATP1A1|476|P05023;B7Z3U6|sodium/potassium-transporting ATPase subunit alpha-1 isoform d [Homo sapiens]	ACVVHGSDLK	AC[+418.1]VVHGSDLK	AC#VVHGSDLK	482.888	3	C632	55.81	731899968	-0.00576494	BTD
NP_006443.1|	PAICS	|PAICS|10606|P22234|multifunctional protein ADE2 isoform 2 [Homo sapiens]	ACGNFGIPCELR	AC[+57]GNFGIPC[+418.1]ELR	ACGNFGIPC#ELR	877.876	2	C295	75.74	51028284	-0.328268	BTD
NP_001242941.1|	MYH10	|MYH10|4628|P35580;F8VTL3;G1UI33;Q4LE45;Q9BWG0|myosin-10 isoform 1 [Homo sapiens]	ADFCIIHYAGK	ADFC[+418.1]IIHYAGK	ADFC#IIHYAGK	552.583	3	C586	74.9	368085104	-0.17809	BTD
NP_001012321.1|	RPSA	|RPSA|3921|P08865|40S ribosomal protein SA [Homo sapiens]	ADHQPLTEASYVNLPTIALCNTDSPLR	ADHQPLTEASYVNLPTIALC[+418.1]NTDSPLR	ADHQPLTEASYVNLPTIALC#NTDSPLR	1119.87	3	C148	83.33	242029040	-0.237798	BTD
NP_001012321.1|	RPSA	|RPSA|3921|P08865|40S ribosomal protein SA [Homo sapiens]	ADHQPLTEASYVNLPTIALCNTDSPLR	ADHQPLTEASYVNLPTIALC[+418.1]NTDSPLR	ADHQPLTEASYVNLPTIALC#NTDSPLR	840.152	4	C148	83.33	138534056	-0.28682	BTD
NP_055518.1|	VPRBP	|VPRBP|9730|Q9Y4B6|protein VPRBP isoform 1 [Homo sapiens]	ADPECMLGHLLR	ADPEC[+418.1]M[+16]LGHLLR	ADPEC#MLGHLLR	596.934	3	C69	69.71	374354096	-0.175121	BTD
NP_008863.3|	SMTN	|SMTN|6525|P53814|smoothelin isoform c [Homo sapiens]	ADVAGPRPCQR	ADVAGPRPC[+418.1]QR	ADVAGPRPC#QR	529.91	3	C296	47.09	665165440	-0.0373746	BTD
NP_003137.1|	SSRP1	|SSRP1|6749|Q08945|FACT complex subunit SSRP1 [Homo sapiens]	ADVIQATGDAICIFR	ADVIQATGDAIC[+418.1]IFR	ADVIQATGDAIC#IFR	1005.97	2	C200	85.57	112477980	-0.299162	BTD
NP_003137.1|	SSRP1	|SSRP1|6749|Q08945|FACT complex subunit SSRP1 [Homo sapiens]	ADVIQATGDAICIFR	ADVIQATGDAIC[+418.1]IFR	ADVIQATGDAIC#IFR	670.985	3	C200	85.57	176171984	-0.268992	BTD
NP_002289.2|	LCP1	|LCP1|3936|P13796|plastin-2 [Homo sapiens]	AECMLQQAER	AEC[+418.1]M[+16]LQQAER	AEC#MLQQAER	806.831	2	C336	55.15	91953980	-0.308883	BTD
NP_002645.3|	PKM	|PKM|5315|P14618|pyruvate kinase isozymes M1/M2 isoform a [Homo sapiens]	AEGSDVANAVLDGADCIMLSGETAK	AEGSDVANAVLDGADC[+418.1]IM[+16]LSGETAK	AEGSDVANAVLDGADC#IMLSGETAK	957.754	3	C358	81.75	223874240	-0.246398	BTD
NP_003355.1|	UPP1	|UPP1|7378|Q16831|uridine phosphorylase 1 [Homo sapiens]	AESHNDCPVR	AESHNDC[+418.1]PVR	AESHNDC#PVR	773.314	2	C17	46.25	123661652	-0.293865	BTD
NP_003355.1|	UPP1	|UPP1|7378|Q16831|uridine phosphorylase 1 [Homo sapiens]	AESHNDCPVR	AESHNDC[+418.1]PVR	AESHNDC#PVR	515.878	3	C17	46.25	499884736	-0.115662	BTD
NP_003283.2|	TPR	|TPR|7175|P12270;Q99968|nucleoprotein TPR [Homo sapiens]	AESQLLECK	AESQLLEC[+418.1]K	AESQLLEC#K	719.821	2	C1127	63.37	121699800	-0.294794	BTD
NP_004915.2|	ACTN4	|ACTN4|81|O43707|alpha-actinin-4 [Homo sapiens]	AETAANRICK	AETAANRIC[+418.1]K	AETAANRIC#K	747.845	2	C282	48.95	536681840	-0.0982324	BTD
NP_004915.2|	ACTN4	|ACTN4|81|O43707|alpha-actinin-4 [Homo sapiens]	AETAANRICK	AETAANRIC[+418.1]K	AETAANRIC#K	498.899	3	C282	48.95	1727849216	0.465979	BTD
NP_003281.1|	TPM4	|TPM4|7171|P67936|tropomyosin alpha-4 chain isoform 2 [Homo sapiens]	AEVSELKCGDLEEELK	AEVSELKC[+418.1]GDLEEELK	AEVSELKC#GDLEEELK	1105.5	2	C154	67.4	3011917952	1.07419	BTD
NP_003281.1|	TPM4	|TPM4|7171|P67936|tropomyosin alpha-4 chain isoform 2 [Homo sapiens]	AEVSELKCGDLEEELK	AEVSELKC[+418.1]GDLEEELK	AEVSELKC#GDLEEELK	737.338	3	C154	67.4	10113926656	4.43815	BTD
NP_003281.1|	TPM4	|TPM4|7171|P67936|tropomyosin alpha-4 chain isoform 2 [Homo sapiens]	AEVSELKCGDLEEELKNVTNNLK	AEVSELKC[+418.1]GDLEEELKNVTNNLK	AEVSELKC#GDLEEELKNVTNNLK	998.479	3	C154	79.85	246755456	-0.23556	BTD
NP_003281.1|	TPM4	|TPM4|7171|P67936|tropomyosin alpha-4 chain isoform 2 [Homo sapiens]	AEVSELKCGDLEEELKNVTNNLK	AEVSELKC[+418.1]GDLEEELKNVTNNLK	AEVSELKC#GDLEEELKNVTNNLK	749.111	4	C154	79.85	1201340992	0.216592	BTD
NP_003671.1|	YARS	|YARS|8565|P54577|tyrosine--tRNA ligase, cytoplasmic [Homo sapiens]	AFCEPGNVENNGVLSFIK	AFC[+418.1]EPGNVENNGVLSFIK	AFC#EPGNVENNGVLSFIK	786.029	3	C250	83.97	36568754	-0.335117	BTD
NP_057542.2|	FAM203A	|FAM203A|51236|Q9BTY7|protein FAM203A [Homo sapiens]	AFLLDPDRCVVQR	AFLLDPDRC[+418.1]VVQR	AFLLDPDRC#VVQR	650.65	3	C199	72.68	1012022912	0.126919	BTD
NP_060441.2|	MRPL20	|MRPL20|55052|Q9BYC9|39S ribosomal protein L20, mitochondrial [Homo sapiens]	AFVKCTK	AFVKC[+418.1]TK	AFVKC#TK	607.788	2	C53	49.81	158124752	-0.277541	BTD
NP_060441.2|	MRPL20	|MRPL20|55052|Q9BYC9|39S ribosomal protein L20, mitochondrial [Homo sapiens]	AFVKCTK	AFVKC[+418.1]TK	AFVKC#TK	405.528	3	C53	49.81	133709132	-0.289105	BTD
NP_056255.2|	MTHFD1L	|MTHFD1L|25902|Q6UB35|monofunctional C1-tetrahydrofolate synthase, mitochondrial isoform 2 precursor [Homo sapiens]	AGAFDAVPCYHWSVGGK	AGAFDAVPC[+418.1]YHWSVGGK	AGAFDAVPC#YHWSVGGK	728.321	3	C828	74.48	48088810	-0.329661	BTD
NP_444505.1|	RPLP0	|RPLP0|6175|P05388|60S acidic ribosomal protein P0 [Homo sapiens]	AGAIAPCEVTVPAQNTGLGPEK	AGAIAPC[+418.1]EVTVPAQNTGLGPEK	AGAIAPC#EVTVPAQNTGLGPEK	847.742	3	C119	70.09	490385520	-0.120161	BTD
NP_001128231.1|	CRYZ	|CRYZ|1429|Q08257|quinone oxidoreductase isoform c [Homo sapiens]	AGESVLVHGASGGVGLAACQIAR	AGESVLVHGASGGVGLAAC[+418.1]QIAR	AGESVLVHGASGGVGLAAC#QIAR	847.749	3	C29	69.27	200137832	-0.257641	BTD
NP_002645.3|	PKM	|PKM|5315|P14618|pyruvate kinase isozymes M1/M2 isoform a [Homo sapiens]	AGKPVICATQMLESMIK	AGKPVIC[+418.1]ATQMLESM[+16]IK	AGKPVIC#ATQMLESMIK	752.029	3	C326	76.13	110910416	-0.233146	BTD
NP_002645.3|	PKM	|PKM|5315|P14618|pyruvate kinase isozymes M1/M2 isoform a [Homo sapiens]	AGKPVICATQMLESMIK	AGKPVIC[+418.1]ATQM[+16]LESM[+16]IK	AGKPVIC#ATQMLESMIK	1135.54	2	C326	66.87	251850976	1.1675	BTD
NP_002645.3|	PKM	|PKM|5315|P14618|pyruvate kinase isozymes M1/M2 isoform a [Homo sapiens]	AGKPVICATQMLESMIK	AGKPVIC[+418.1]ATQM[+16]LESM[+16]IK	AGKPVIC#ATQMLESMIK	757.361	3	C326	66.87	3208913536	-0.299904	BTD
NP_004085.1|	EIF2S1	|EIF2S1|1965|P05198;Q53XC0|eukaryotic translation initiation factor 2 subunit 1 [Homo sapiens]	AGLNCSTENMPIK	AGLNC[+418.1]STENM[+16]PIK	AGLNC#STENMPIK	906.392	2	C218	57.39	251958448	-0.233095	BTD
NP_004359.1|	CNN2	|CNN2|1265|Q99439|calponin-2 isoform a [Homo sapiens]	AGQCVIGLQMGTNK	AGQC[+418.1]VIGLQM[+16]GTNK	AGQC#VIGLQMGTNK	927.421	2	C164	65.56	71229484	-0.3187	BTD
NP_003548.1|	PIP5K1A	|PIP5K1A|8394|Q99755|phosphatidylinositol 4-phosphate 5-kinase type-1 alpha isoform 2 [Homo sapiens]	AGSSGNSCITYQPSVSGEHK	AGSSGNSC[+418.1]ITYQPSVSGEHK	AGSSGNSC#ITYQPSVSGEHK	809.683	3	C467	55.27	106531508	-0.301979	BTD
NP_036601.2|	PRPF6	|PRPF6|24148|O94906|pre-mRNA-processing factor 6 [Homo sapiens]	AGSVATCQAVMR	AGSVATC[+418.1]QAVM[+16]R	AGSVATC#QAVMR	814.355	2	C522	53.82	104628796	-0.30288	BTD
NP_006827.1|	GCN1L1	|GCN1L1|10985|Q92616|translational activator GCN1 [Homo sapiens]	AGSVELLGAMAYCAPK	AGSVELLGAM[+16]AYC[+418.1]APK	AGSVELLGAMAYC#APK	672.307	3	C1527	71.84	59448914	-0.32428	BTD
NP_004784.2|	LONP1	|LONP1|9361|P36776|lon protease homolog, mitochondrial [Homo sapiens]	AGVTCIVLPAENKK	AGVTC[+418.1]IVLPAENKK	AGVTC#IVLPAENKK	620.983	3	C909	67.17	369017712	-0.177649	BTD
NP_006576.2|	CCT8	|CCT8|10694|P50990|T-complex protein 1 subunit theta [Homo sapiens]	AHEILPNLVCCSAK	AHEILPNLVC[+418.1]C[+57]SAK	AHEILPNLVC#CSAK	658.307	3	C148	68.84	755535424	0.00543029	BTD
NP_006576.2|	CCT8	|CCT8|10694|P50990|T-complex protein 1 subunit theta [Homo sapiens]	AHEILPNLVCCSAK	AHEILPNLVC[+57]C[+418.1]SAK	AHEILPNLVCC#SAK	658.307	3	C149	68.47	416470288	-0.155172	BTD
NP_055521.1|	SART3	|SART3|9733|Q15020|squamous cell carcinoma antigen recognized by T-cells 3 [Homo sapiens]	AHGDTQHCR	AHGDTQHC[+418.1]R	AHGDTQHC#R	481.528	3	C527	31.16	304958704	-0.207991	BTD
NP_004850.1|	CLTC	|CLTC|1213|Q00610|clathrin heavy chain 1 [Homo sapiens]	AHIAQLCEK	AHIAQLC[+418.1]EK	AHIAQLC#EK	715.831	2	C617	54.73	958564672	0.101598	BTD
NP_004850.1|	CLTC	|CLTC|1213|Q00610|clathrin heavy chain 1 [Homo sapiens]	AHIAQLCEK	AHIAQLC[+418.1]EK	AHIAQLC#EK	477.557	3	C617	54.73	1454889280	0.336688	BTD
NP_055427.2|	FAM120A	|FAM120A|23196|Q9NZB2|constitutive coactivator of PPAR-gamma-like protein 1 [Homo sapiens]	AHQLVLPPCDVVIK	AHQLVLPPC[+418.1]DVVIK	AHQLVLPPC#DVVIK	650.671	3	C279	72.61	639149408	-0.0496974	BTD
NP_001447.2|	FLNA	|FLNA|2316|P21333;Q60FE5;Q6NXF2|filamin-A isoform 1 [Homo sapiens]	AHVVPCFDASK	AHVVPC[+418.1]FDASK	AHVVPC#FDASK	796.355	2	C1157	62.98	1728730112	0.466396	BTD
NP_001447.2|	FLNA	|FLNA|2316|P21333;Q60FE5;Q6NXF2|filamin-A isoform 1 [Homo sapiens]	AHVVPCFDASK	AHVVPC[+418.1]FDASK	AHVVPC#FDASK	531.239	3	C1157	62.98	3796109568	1.44564	BTD
NP_009057.1|	VCP	|VCP|7415|P55072;Q96IF9|transitional endoplasmic reticulum ATPase [Homo sapiens]	AIANECQANFISIK	AIANEC[+418.1]QANFISIK	AIANEC#QANFISIK	970.456	2	C535	72.13	291174856	-0.21452	BTD
NP_009057.1|	VCP	|VCP|7415|P55072;Q96IF9|transitional endoplasmic reticulum ATPase [Homo sapiens]	AIANECQANFISIK	AIANEC[+418.1]QANFISIK	AIANEC#QANFISIK	647.306	3	C535	72.13	276758264	-0.221348	BTD
NP_005908.1|	MDH1	|MDH1|4190|P40925|malate dehydrogenase, cytoplasmic isoform 2 [Homo sapiens]	AICDHVR	AIC[+418.1]DHVR	AIC#DHVR	616.271	2	C251	50.2	283598816	-0.218108	BTD
NP_005908.1|	MDH1	|MDH1|4190|P40925|malate dehydrogenase, cytoplasmic isoform 2 [Homo sapiens]	AICDHVR	AIC[+418.1]DHVR	AIC#DHVR	411.183	3	C251	50.2	879194048	0.0640027	BTD
NP_003012.1|	SGTA	|SGTA|6449|O43765|small glutamine-rich tetratricopeptide repeat-containing protein alpha [Homo sapiens]	AICIDPAYSK	AIC[+418.1]IDPAYSK	AIC#IDPAYSK	749.839	2	C153	67.68	319526016	-0.201091	BTD
NP_001034679.2|	USP9X	|USP9X|8239|Q93008;Q6P468|probable ubiquitin carboxyl-terminal hydrolase FAF-X isoform 3 [Homo sapiens]	AICLDHAK	AIC[+418.1]LDHAK	AIC#LDHAK	430.199	3	C1061	54.77	91785140	-0.308963	BTD
NP_002793.2|	PSMC1	|PSMC1|5700|P62191;Q53XL8|26S protease regulatory subunit 4 [Homo sapiens]	AICTEAGLMALR	AIC[+418.1]TEAGLM[+16]ALR	AIC#TEAGLMALR	841.889	2	C399	69.83	135916512	-0.28806	BTD
NP_004095.4|	FASN	|FASN|2194|P49327|fatty acid synthase [Homo sapiens]	AINCATSGVVGLVNCLR	AINC[+57]ATSGVVGLVNC[+418.1]LR	AINCATSGVVGLVNC#LR	722.348	3	C1459	85.55	49954798	-0.328777	BTD
NP_055423.1|	CYFIP1	|CYFIP1|23191|Q7L576|cytoplasmic FMR1-interacting protein 1 isoform a [Homo sapiens]	AIPQVKCNEQPNR	AIPQVKC[+418.1]NEQPNR	AIPQVKC#NEQPNR	957.951	2	C98	52.19	47734140	-0.329829	BTD
NP_055423.1|	CYFIP1	|CYFIP1|23191|Q7L576|cytoplasmic FMR1-interacting protein 1 isoform a [Homo sapiens]	AIPQVKCNEQPNR	AIPQVKC[+418.1]NEQPNR	AIPQVKC#NEQPNR	638.97	3	C98	52.19	323669328	-0.199128	BTD
NP_001092090.1|	PCBP2	|PCBP2|5094|Q15366|poly(rC)-binding protein 2 isoform c [Homo sapiens]	AITIAGIPQSIIECVK	AITIAGIPQSIIEC[+418.1]VK	AITIAGIPQSIIEC#VK	692.029	3	C158	92.27	42897204	-0.33212	BTD
NP_031381.2|	HSP90AB1	|HSP90AB1|3326|P08238|heat shock protein HSP 90-beta [Homo sapiens]	AKFENLCK	AKFENLC[+418.1]K	AKFENLC#K	685.815	2	C564	57.21	512788320	-0.10955	BTD
NP_071334.1|	EGLN1	|EGLN1|54583|Q9GZT9|egl nine homolog 1 [Homo sapiens]	AKPPADPAAAASPCR	AKPPADPAAAASPC[+418.1]R	AKPPADPAAAASPC#R	614.287	3	C127	51	633454976	-0.0523946	BTD
NP_006004.2|	RPL10	|RPL10|6134|P27635|60S ribosomal protein L10 isoform a [Homo sapiens]	AKVDEFPLCGHMVSDEYEQLSSEALEAAR	AKVDEFPLC[+418.1]GHM[+16]VSDEYEQLSSEALEAAR	AKVDEFPLC#GHMVSDEYEQLSSEALEAAR	915.409	4	C49	79.2	61300808	-0.323403	BTD
NP_006746.1|	TALDO1	|TALDO1|6888|P37837|transaldolase [Homo sapiens]	ALAGCDFLTISPK	ALAGC[+418.1]DFLTISPK	ALAGC#DFLTISPK	877.418	2	C250	80.48	293756480	-0.213297	BTD
NP_006746.1|	TALDO1	|TALDO1|6888|P37837|transaldolase [Homo sapiens]	ALAGCDFLTISPK	ALAGC[+418.1]DFLTISPK	ALAGC#DFLTISPK	585.281	3	C250	80.48	109008084	-0.300805	BTD
NP_510965.1|	PUF60	|PUF60|22827|Q9UHX1|poly(U)-binding-splicing factor PUF60 isoform a [Homo sapiens]	ALAIMCR	ALAIM[+16]C[+418.1]R	ALAIMC#R	606.272	2	C129	63.03	81274280	-0.313942	BTD
NP_006827.1|	GCN1L1	|GCN1L1|10985|Q92616|translational activator GCN1 [Homo sapiens]	ALCDPLEEVR	ALC[+418.1]DPLEEVR	ALC#DPLEEVR	781.853	2	C2015	75.67	33170231	-0.336727	BTD
NP_006800.2|	TOMM34	|TOMM34|10953|Q15785|mitochondrial import receptor subunit TOM34 [Homo sapiens]	ALCYLVLK	ALC[+418.1]YLVLK	ALC#YLVLK	670.841	2	C236	79.26	38412570	-0.334244	BTD
NP_031389.3|	NONO	|NONO|4841|Q15233|non-POU domain-containing octamer-binding protein isoform 1 [Homo sapiens]	ALDRCSEGSFLLTTFPR	ALDRC[+418.1]SEGSFLLTTFPR	ALDRC#SEGSFLLTTFPR	777.701	3	C208	77.77	704458016	-0.0187632	BTD
NP_003306.3|	DNAJC7	|DNAJC7|7266|Q99615|dnaJ homolog subfamily C member 7 isoform 1 [Homo sapiens]	ALEFAPACHR	ALEFAPAC[+418.1]HR	ALEFAPAC#HR	766.842	2	C175	62.3	334697184	-0.193905	BTD
NP_003306.3|	DNAJC7	|DNAJC7|7266|Q99615|dnaJ homolog subfamily C member 7 isoform 1 [Homo sapiens]	ALEFAPACHR	ALEFAPAC[+418.1]HR	ALEFAPAC#HR	511.564	3	C175	62.3	260355352	-0.229118	BTD
NP_001880.2|	CRYZ	|CRYZ|1429|Q08257|quinone oxidoreductase isoform a [Homo sapiens]	ALIHSACVK	ALIHSAC[+418.1]VK	ALIHSAC#VK	680.331	2	C145	54.61	181145352	-0.266637	BTD
NP_001073027.1|	HNRNPUL2	|HNRNPUL2|221092|Q1KMD3|heterogeneous nuclear ribonucleoprotein U-like protein 2 [Homo sapiens]	ALLPHVLCK	ALLPHVLC[+418.1]K	ALLPHVLC#K	471.246	3	C405	70.48	164226784	-0.27465	BTD
NP_060440.2|	C14orf102	|C14orf102|55051|Q9H7Z3|UPF0614 protein C14orf102 [Homo sapiens]	ALQNCPWAK	ALQNC[+418.1]PWAK	ALQNC#PWAK	724.826	2	C1119	66.1	219181656	-0.24862	BTD
NP_003581.1|	CUL3	|CUL3|8452|Q13618|cullin-3 isoform 1 [Homo sapiens]	ALQSLACGKPTQR	ALQSLAC[+418.1]GKPTQR	ALQSLAC#GKPTQR	597.627	3	C636	55.25	261249616	-0.228694	BTD
NP_060439.2|	IWS1	|IWS1|55677|Q96ST2|protein IWS1 homolog [Homo sapiens]	ALRPGDPGFCAR	ALRPGDPGFC[+418.1]AR	ALRPGDPGFC#AR	559.926	3	C749	58.46	846800960	0.0486593	BTD
NP_006810.1|	STIP1	|STIP1|10963|P31948|stress-induced-phosphoprotein 1 [Homo sapiens]	ALSVGNIDDALQCYSEAIK	ALSVGNIDDALQC[+418.1]YSEAIK	ALSVGNIDDALQC#YSEAIK	810.043	3	C26	87.63	64995294	-0.321653	BTD
NP_116032.1|	IRF5	|IRF5|3663|Q13568|interferon regulatory factor 5 isoform b [Homo sapiens]	ALTISNPHGCR	ALTISNPHGC[+418.1]R	ALTISNPHGC#R	529.578	3	C272	52.76	89250560	-0.310164	BTD
NP_003964.3|	RPL14	|RPL14|9045|P50914|60S ribosomal protein L14 [Homo sapiens]	ALVDGPCTQVR	ALVDGPC[+418.1]TQVR	ALVDGPC#TQVR	788.866	2	C42	63.44	1123228544	0.179593	BTD
NP_115571.1|	SON	|SON|6651|P18583|protein SON isoform B [Homo sapiens]	ANAAAMCAK	ANAAAM[+16]C[+418.1]AK	ANAAAMC#AK	642.762	2	C2070	45.98	683961952	-0.0284714	BTD
NP_733765.1|	ATP2A2	|ATP2A2|488|P16615|sarcoplasmic/endoplasmic reticulum calcium ATPase 2 isoform b [Homo sapiens]	ANACNSVIK	ANAC[+418.1]NSVIK	ANAC#NSVIK	669.302	2	C471	56.39	300288240	-0.210203	BTD
NP_001073027.1|	HNRNPUL2	|HNRNPUL2|221092|Q1KMD3|heterogeneous nuclear ribonucleoprotein U-like protein 2 [Homo sapiens]	ANFSLPEKCDYMDEVTYGELEKEEAQPIVTK	ANFSLPEKC[+418.1]DYM[+16]DEVTYGELEKEEAQPIVTK	ANFSLPEKC#DYMDEVTYGELEKEEAQPIVTK	1003.46	4	C602	69.46	379939872	-0.172475	BTD
NP_056988.3|	EIF5B	|EIF5B|9669|O60841;Q8N5A0|eukaryotic translation initiation factor 5B [Homo sapiens]	APIICVLGHVDTGK	APIIC[+418.1]VLGHVDTGK	APIIC#VLGHVDTGK	614.308	3	C635	75.35	253394856	-0.232415	BTD
NP_008835.5|	PRKDC	|PRKDC|5591|P78527|DNA-dependent protein kinase catalytic subunit isoform 1 [Homo sapiens]	APPCEYKDWLTK	APPC[+418.1]EYKDWLTK	APPC#EYKDWLTK	934.921	2	C3837	67.17	290508752	-0.214835	BTD
NP_008835.5|	PRKDC	|PRKDC|5591|P78527|DNA-dependent protein kinase catalytic subunit isoform 1 [Homo sapiens]	APPCEYKDWLTK	APPC[+418.1]EYKDWLTK	APPC#EYKDWLTK	623.616	3	C3837	67.17	1878856768	0.537505	BTD
NP_004492.2|	HNRNPU	|HNRNPU|3192|Q00839|heterogeneous nuclear ribonucleoprotein U isoform b [Homo sapiens]	APQCLGK	APQC[+418.1]LGK	APQC#LGK	567.757	2	C543	54.83	13712843776	6.14282	BTD
NP_001447.2|	FLNA	|FLNA|2316|P21333;Q60FE5;Q6NXF2|filamin-A isoform 1 [Homo sapiens]	APSVANVGSHCDLSLK	APSVANVGSHC[+418.1]DLSLK	APSVANVGSHC#DLSLK	1008.47	2	C2152	62.71	209765304	-0.253081	BTD
NP_001447.2|	FLNA	|FLNA|2316|P21333;Q60FE5;Q6NXF2|filamin-A isoform 1 [Homo sapiens]	APSVANVGSHCDLSLK	APSVANVGSHC[+418.1]DLSLK	APSVANVGSHC#DLSLK	672.649	3	C2152	62.71	834579040	0.0428703	BTD
NP_037373.2|	FHOD1	|FHOD1|29109|Q9Y613|FH1/FH2 domain-containing protein 1 [Homo sapiens]	APTCSLDGALPLGAQIPAVHR	APTC[+418.1]SLDGALPLGAQIPAVHR	APTC#SLDGALPLGAQIPAVHR	835.751	3	C43	76.25	190330160	-0.262286	BTD
NP_001272.2|	TBCB	|TBCB|1155|Q99426|tubulin-folding cofactor B [Homo sapiens]	AQASSIPVGSRCEVR	AQASSIPVGSRC[+418.1]EVR	AQASSIPVGSRC#EVR	659.98	3	C165	53.83	269634164	-0.224723	BTD
NP_001000.2|	RPS5	|RPS5|6193|P46782|40S ribosomal protein S5 [Homo sapiens]	AQCPIVER	AQC[+418.1]PIVER	AQC#PIVER	667.305	2	C66	59.22	648127984	-0.0454446	BTD
NP_060327.3|	SSH3	|SSH3|54961|Q8TE77|protein phosphatase Slingshot homolog 3 [Homo sapiens]	AQGTHVLVHCK	AQGTHVLVHC[+418.1]K	AQGTHVLVHC#K	537.59	3	C413	46.58	331217824	-0.195553	BTD
NP_060327.3|	SSH3	|SSH3|54961|Q8TE77|protein phosphatase Slingshot homolog 3 [Homo sapiens]	AQGTHVLVHCK	AQGTHVLVHC[+418.1]K	AQGTHVLVHC#K	403.445	4	C413	46.58	303149776	-0.208848	BTD
NP_005563.1|	LMNA	|LMNA|4000|P02545|lamin isoform C [Homo sapiens]	AQNTWGCGNSLR	AQNTWGC[+418.1]GNSLR	AQNTWGC#GNSLR	862.867	2	C522	63.67	86187810	-0.311615	BTD
NP_006280.3|	TLN1	|TLN1|7094|Q9Y490|talin-1 [Homo sapiens]	ASAGPQPLLVQSCK	ASAGPQPLLVQSC[+418.1]K	ASAGPQPLLVQSC#K	908.94	2	C956	67.67	77079524	-0.315929	BTD
NP_000843.1|	GSTP1	|GSTP1|2950|P09211|glutathione S-transferase P [Homo sapiens]	ASCLYGQLPK	ASC[+418.1]LYGQLPK	ASC#LYGQLPK	749.347	2	C48	67.34	399311248	-0.1633	BTD
NP_001367.2|	DYNC1H1	|DYNC1H1|1778|Q14204|cytoplasmic dynein 1 heavy chain 1 [Homo sapiens]	ASLACGPMVK	ASLAC[+418.1]GPM[+16]VK	ASLAC#GPMVK	705.814	2	C3389	58.51	377532752	-0.173615	BTD
NP_001609.2|	PARP1	|PARP1|142|P09874|poly [ADP-ribose] polymerase 1 [Homo sapiens]	ASLCISTK	ASLC[+418.1]ISTK	ASLC#ISTK	620.789	2	C429	63.97	184092480	-0.265241	BTD
NP_001447.2|	FLNA	|FLNA|2316|P21333;Q60FE5;Q6NXF2|filamin-A isoform 1 [Homo sapiens]	ATCAPQHGAPGPGPADASK	ATC[+418.1]APQHGAPGPGPADASK	ATC#APQHGAPGPGPADASK	717.651	3	C2535	45.1	1928462400	0.561002	BTD
NP_078895.2|	FN3KRP	|FN3KRP|79672|Q9HA64|ketosamine-3-kinase [Homo sapiens]	ATGHSGGGCISQGR	ATGHSGGGC[+418.1]ISQGR	ATGHSGGGC#ISQGR	853.362	2	C24	45.32	74679368	-0.317066	BTD
NP_078895.2|	FN3KRP	|FN3KRP|79672|Q9HA64|ketosamine-3-kinase [Homo sapiens]	ATGHSGGGCISQGR	ATGHSGGGC[+418.1]ISQGR	ATGHSGGGC#ISQGR	569.244	3	C24	45.32	570321648	-0.0822985	BTD
NP_005782.1|	MPHOSPH10	|MPHOSPH10|10199|O00566|U3 small nucleolar ribonucleoprotein protein MPP10 [Homo sapiens]	ATGRPECFLTIQEGLASK	ATGRPEC[+418.1]FLTIQEGLASK	ATGRPEC#FLTIQEGLASK	780.377	3	C27	74.71	527279792	-0.102686	BTD
NP_060831.2|	AGPAT5	|AGPAT5|55326|Q9NUQ2|1-acyl-sn-glycerol-3-phosphate acyltransferase epsilon [Homo sapiens]	ATHVAFDCMK	ATHVAFDC[+418.1]M[+16]K	ATHVAFDC#MK	778.82	2	C217	53.89	263518496	-0.22762	BTD
NP_060831.2|	AGPAT5	|AGPAT5|55326|Q9NUQ2|1-acyl-sn-glycerol-3-phosphate acyltransferase epsilon [Homo sapiens]	ATHVAFDCMK	ATHVAFDC[+418.1]M[+16]K	ATHVAFDC#MK	519.549	3	C217	53.89	754667168	0.00501903	BTD
NP_060979.2|	LRRC59	|LRRC59|55379|Q96AG4|leucine-rich repeat-containing protein 59 [Homo sapiens]	ATILDLSCNK	ATILDLSC[+418.1]NK	ATILDLSC#NK	748.35	2	C48	73.11	190367072	-0.262269	BTD
NP_003592.3|	SMARCA5	|SMARCA5|8467|O60264|SWI/SNF-related matrix-associated actin-dependent regulator of chromatin subfamily A member 5 [Homo sapiens]	ATNVCTR	ATNVC[+418.1]TR	ATNVC#TR	591.755	2	C165	49.08	278141744	-0.220693	BTD
NP_079472.1|	GRPEL1	|GRPEL1|80273|Q9HAV7|grpE protein homolog 1, mitochondrial precursor [Homo sapiens]	ATQCVPK	ATQC[+418.1]VPK	ATQC#VPK	582.762	2	C124	52.1	236298144	-0.240513	BTD
NP_060708.1|	AGK	|AGK|55750|Q53H12;A4D1U5|acylglycerol kinase, mitochondrial precursor [Homo sapiens]	ATVFLNPAACK	ATVFLNPAAC[+418.1]K	ATVFLNPAAC#K	776.868	2	C72	70.07	574908096	-0.0801261	BTD
NP_060708.1|	AGK	|AGK|55750|Q53H12;A4D1U5|acylglycerol kinase, mitochondrial precursor [Homo sapiens]	ATVFLNPAACK	ATVFLNPAAC[+418.1]K	ATVFLNPAAC#K	518.248	3	C72	70.07	214568952	-0.250805	BTD
NP_001019.1|	RPS25	|RPS25|6230|P62851|40S ribosomal protein S25 [Homo sapiens]	ATYDKLCK	ATYDKLC[+418.1]K	ATYDKLC#K	680.307	2	C59	53.95	1602989952	0.406838	BTD
NP_055874.2|	TLN2	|TLN2|83660|Q9Y4G6|talin-2 [Homo sapiens]	AVAAGNSCR	AVAAGNSC[+418.1]R	AVAAGNSC#R	633.771	2	C2197	46.83	156832024	-0.278153	BTD
NP_003277.1|	TOP1	|TOP1|7150|P11387|DNA topoisomerase 1 [Homo sapiens]	AVAILCNHQR	AVAILC[+418.1]NHQR	AVAILC#NHQR	771.869	2	C630	57.78	1305307392	0.265837	BTD
NP_003277.1|	TOP1	|TOP1|7150|P11387|DNA topoisomerase 1 [Homo sapiens]	AVAILCNHQR	AVAILC[+418.1]NHQR	AVAILC#NHQR	514.915	3	C630	57.78	2011597696	0.60038	BTD
NP_002797.3|	PSMC6	|PSMC6|5706|P62333|26S protease regulatory subunit 10B [Homo sapiens]	AVASQLDCNFLK	AVASQLDC[+418.1]NFLK	AVASQLDC#NFLK	863.9	2	C207	73.25	819221184	0.0355958	BTD
NP_002797.3|	PSMC6	|PSMC6|5706|P62333|26S protease regulatory subunit 10B [Homo sapiens]	AVASQLDCNFLK	AVASQLDC[+418.1]NFLK	AVASQLDC#NFLK	576.269	3	C207	73.25	250542336	-0.233766	BTD
NP_005991.1|	TUBA4A	|TUBA4A|7277|P68366|tubulin alpha-4A chain [Homo sapiens]	AVCMLSNTTAIAEAWAR	AVC[+418.1]M[+16]LSNTTAIAEAWAR	AVC#MLSNTTAIAEAWAR	1121.51	2	C376	80.64	238274960	-0.239577	BTD
NP_005991.1|	TUBA4A	|TUBA4A|7277|P68366|tubulin alpha-4A chain [Homo sapiens]	AVCMLSNTTAIAEAWAR	AVC[+418.1]M[+16]LSNTTAIAEAWAR	AVC#MLSNTTAIAEAWAR	748.008	3	C376	80.64	545295104	-0.0941527	BTD
NP_116093.1|	TUBA1C	|TUBA1C|84790|Q9BQE3|tubulin alpha-1C chain [Homo sapiens]	AVCMLSNTTAVAEAWAR	AVC[+418.1]M[+16]LSNTTAVAEAWAR	AVC#MLSNTTAVAEAWAR	743.336	3	C376	77.12	317699568	-0.201956	BTD
NP_056474.2|	RSL1D1	|RSL1D1|26156|O76021|ribosomal L1 domain-containing protein 1 [Homo sapiens]	AVDALLTHCK	AVDALLTHC[+418.1]K	AVDALLTHC#K	744.852	2	C47	61.47	522659648	-0.104874	BTD
NP_056474.2|	RSL1D1	|RSL1D1|26156|O76021|ribosomal L1 domain-containing protein 1 [Homo sapiens]	AVDALLTHCK	AVDALLTHC[+418.1]K	AVDALLTHC#K	496.904	3	C47	61.47	645059808	-0.0468979	BTD
NP_005539.1|	KARS	|KARS|3735|Q15046|lysine--tRNA ligase isoform 2 [Homo sapiens]	AVECPPPR	AVEC[+418.1]PPPR	AVEC#PPPR	643.786	2	C434	54.08	67927534	-0.320264	BTD
NP_006861.1|	DSTN	|DSTN|11034|P60981|destrin isoform a [Homo sapiens]	AVIFCLSADKK	AVIFC[+418.1]LSADKK	AVIFC#LSADKK	538.267	3	C39	71.03	143465520	-0.284484	BTD
NP_733840.1|	NLRX1	|NLRX1|79671|Q86UT6|NLR family member X1 isoform 2 [Homo sapiens]	AVLAQLGCPIK	AVLAQLGC[+418.1]PIK	AVLAQLGC#PIK	765.894	2	C644	74.28	131147628	-0.290319	BTD
NP_008839.2|	RAC1	|RAC1|5879|P63000;A4D2P1|ras-related C3 botulinum toxin substrate 1 isoform Rac1 [Homo sapiens]	AVLCPPPVK	AVLC[+418.1]PPPVK	AVLC#PPPVK	671.338	2	C178	68.1	3823697536	1.4587	BTD
NP_008839.2|	RAC1	|RAC1|5879|P63000;A4D2P1|ras-related C3 botulinum toxin substrate 1 isoform Rac1 [Homo sapiens]	AVLCPPPVK	AVLC[+418.1]PPPVK	AVLC#PPPVK	447.895	3	C178	68.1	482939776	-0.123688	BTD
NP_008839.2|	RAC1	|RAC1|5879|P63000;A4D2P1|ras-related C3 botulinum toxin substrate 1 isoform Rac1 [Homo sapiens]	AVLCPPPVKK	AVLC[+418.1]PPPVKK	AVLC#PPPVKK	490.593	3	C178	58.71	130385294	-0.29068	BTD
NP_005498.1|	CFL1	|CFL1|1072|P23528|cofilin-1 [Homo sapiens]	AVLFCLSEDKK	AVLFC[+418.1]LSEDKK	AVLFC#LSEDKK	835.899	2	C39	71.44	997763584	0.120165	BTD
NP_005498.1|	CFL1	|CFL1|1072|P23528|cofilin-1 [Homo sapiens]	AVLFCLSEDKK	AVLFC[+418.1]LSEDKK	AVLFC#LSEDKK	557.602	3	C39	71.44	3936310912	1.51204	BTD
NP_001395.1|	EEF1G	|EEF1G|1937|P26641;Q53YD7|elongation factor 1-gamma [Homo sapiens]	AVLGEVKLCEK	AVLGEVKLC[+418.1]EK	AVLGEVKLC#EK	536.27	3	C210	64.86	517673264	-0.107236	BTD
NP_061185.1|	RCC2	|RCC2|55920|Q9P258|protein RCC2 [Homo sapiens]	AVQDLCGWR	AVQDLC[+418.1]GWR	AVQDLC#GWR	733.321	2	C428	71.57	183432056	-0.265554	BTD
NP_001035828.1|	TROVE2	|TROVE2|6738|P10155;Q5LJA0|60 kDa SS-A/Ro ribonucleoprotein isoform 1 [Homo sapiens]	AVSEVCR	AVSEVC[+418.1]R	AVSEVC#R	591.258	2	C119	54.1	127439760	-0.292075	BTD
NP_004492.2|	HNRNPU	|HNRNPU|3192|Q00839|heterogeneous nuclear ribonucleoprotein U isoform b [Homo sapiens]	AVVVCPK	AVVVC[+418.1]PK	AVVVC#PK	567.278	2	C588	61.46	6267607040	2.61629	BTD
NP_004492.2|	HNRNPU	|HNRNPU|3192|Q00839|heterogeneous nuclear ribonucleoprotein U isoform b [Homo sapiens]	AVVVCPKDEDYK	AVVVC[+418.1]PKDEDYK	AVVVC#PKDEDYK	595.273	3	C588	56.53	308991008	-0.206081	BTD
NP_056107.1|	ESYT1	|ESYT1|23344|Q9BSJ8|extended synaptotagmin-1 isoform 2 [Homo sapiens]	AVYSTNCPVWEEAFR	AVYSTNC[+418.1]PVWEEAFR	AVYSTNC#PVWEEAFR	730.652	3	C522	81.14	87623060	-0.310935	BTD
NP_001596.2|	AARS	|AARS|16|P49588|alanine--tRNA ligase, cytoplasmic [Homo sapiens]	AVYTQDCPLAAAK	AVYTQDC[+418.1]PLAAAK	AVYTQDC#PLAAAK	884.905	2	C671	67.48	288135864	-0.215959	BTD
NP_001596.2|	AARS	|AARS|16|P49588|alanine--tRNA ligase, cytoplasmic [Homo sapiens]	AVYTQDCPLAAAK	AVYTQDC[+418.1]PLAAAK	AVYTQDC#PLAAAK	590.273	3	C671	67.48	110987356	-0.299868	BTD
NP_006810.1|	STIP1	|STIP1|10963|P31948|stress-induced-phosphoprotein 1 [Homo sapiens]	AYEDGCK	AYEDGC[+418.1]K	AYEDGC#K	602.226	2	C62	49.84	188299840	-0.263248	BTD
NP_004850.1|	CLTC	|CLTC|1213|Q00610|clathrin heavy chain 1 [Homo sapiens]	AYEFAERCNEPAVWSQLAK	AYEFAERC[+418.1]NEPAVWSQLAK	AYEFAERC#NEPAVWSQLAK	877.398	3	C1102	73.02	203518976	-0.256039	BTD
NP_000986.2|	RPL34	|RPL34|6164|P49207|60S ribosomal protein L34 [Homo sapiens]	AYGGSMCAK	AYGGSM[+16]C[+418.1]AK	AYGGSMC#AK	661.254	2	C83	47.02	167250704	-0.273218	BTD
NP_005991.1|	TUBA4A	|TUBA4A|7277|P68366|tubulin alpha-4A chain [Homo sapiens]	AYHEQLSVAEITNACFEPANQMVK	AYHEQLSVAEITNAC[+418.1]FEPANQM[+16]VK	AYHEQLSVAEITNAC#FEPANQMVK	1043.14	3	C295	76.21	2159146240	0.670268	BTD
NP_005991.1|	TUBA4A	|TUBA4A|7277|P68366|tubulin alpha-4A chain [Homo sapiens]	AYHEQLSVAEITNACFEPANQMVK	AYHEQLSVAEITNAC[+418.1]FEPANQM[+16]VK	AYHEQLSVAEITNAC#FEPANQMVK	782.604	4	C295	76.21	1171706048	0.202555	BTD
NP_116093.1|	TUBA1C	|TUBA1C|84790|Q9BQE3|tubulin alpha-1C chain [Homo sapiens]	AYHEQLTVAEITNACFEPANQMVK	AYHEQLTVAEITNAC[+418.1]FEPANQM[+16]VK	AYHEQLTVAEITNAC#FEPANQMVK	1047.81	3	C295	77.07	600177840	-0.0681568	BTD
NP_116093.1|	TUBA1C	|TUBA1C|84790|Q9BQE3|tubulin alpha-1C chain [Homo sapiens]	AYHEQLTVAEITNACFEPANQMVK	AYHEQLTVAEITNAC[+418.1]FEPANQM[+16]VK	AYHEQLTVAEITNAC#FEPANQMVK	786.108	4	C295	77.07	329046032	-0.196582	BTD
NP_005943.1|	MT1X	|MT1X|4501|P80297|metallothionein-1X [Homo sapiens]	CAQGCICK	C[+57]AQGC[+418.1]IC[+57]K	CAQGC#ICK	679.261	2	C48	51.44	82385972	-0.313415	BTD
NP_002645.3|	PKM	|PKM|5315|P14618|pyruvate kinase isozymes M1/M2 isoform a [Homo sapiens]	CCSGAIIVLTK	C[+57]C[+418.1]SGAIIVLTK	CC#SGAIIVLTK	791.875	2	C424	72.37	240864928	-0.23835	BTD
NP_002645.3|	PKM	|PKM|5315|P14618|pyruvate kinase isozymes M1/M2 isoform a [Homo sapiens]	CCSGAIIVLTK	C[+57]C[+418.1]SGAIIVLTK	CC#SGAIIVLTK	528.252	3	C424	72.37	61817720	-0.323158	BTD
NP_001129064.1|	RPS27A	|RPS27A|6233|P62979;B2RDW1|ubiquitin-40S ribosomal protein S27a precursor [Homo sapiens]	CCLTYCFNKPEDK	C[+57]C[+57]LTYC[+418.1]FNKPEDK	CCLTYC#FNKPEDK	699.284	3	C149	63.18	533536576	-0.0997222	BTD
NP_001737.1|	CANX	|CANX|821|P27824|calnexin precursor [Homo sapiens]	CESAPGCGVWQRPVIDNPNYK	C[+57]ESAPGC[+418.1]GVWQRPVIDNPNYK	CESAPGC#GVWQRPVIDNPNYK	936.749	3	C366	66.71	212336664	-0.251863	BTD
NP_066964.1|	XRCC5	|XRCC5|7520|P13010|X-ray repair cross-complementing protein 5 [Homo sapiens]	CFSVLGFCK	C[+57]FSVLGFC[+418.1]K	CFSVLGFC#K	739.817	2	C346	82.13	26649291	-0.339816	BTD
NP_003355.1|	UPP1	|UPP1|7378|Q16831|uridine phosphorylase 1 [Homo sapiens]	CVGAELGLDCPGR	C[+57]VGAELGLDC[+418.1]PGR	CVGAELGLDC#PGR	882.879	2	C80	69.4	62500616	-0.322834	BTD
NP_056992.4|	SRRT	|SRRT|51593|Q9BXP5|serrate RNA effector molecule homolog isoform a [Homo sapiens]	DAAGLECKPR	DAAGLEC[+418.1]KPR	DAAGLEC#KPR	493.224	3	C412	52.5	120285352	-0.295464	BTD
NP_036602.1|	TNPO3	|TNPO3|23534|Q9Y5L0;B3KMX1|transportin-3 isoform 1 [Homo sapiens]	DANCSVMR	DANC[+418.1]SVM[+16]R	DANC#SVMR	665.255	2	C793	49.87	234618664	-0.241308	BTD
NP_001244955.1|	TPI1	|TPI1|7167|B7Z5D8|triosephosphate isomerase isoform 3 [Homo sapiens]	DCGATWVVLGHSER	DC[+418.1]GATWVVLGHSER	DC#GATWVVLGHSER	649.954	3	C5	70.88	460741280	-0.134203	BTD
NP_001230587.1|	GLRX	|GLRX|2745|P35754|glutaredoxin-1 [Homo sapiens]	DCIGGCSDLVSLQQSGELLTR	DC[+418.1]IGGC[+57]SDLVSLQQSGELLTR	DC#IGGCSDLVSLQQSGELLTR	890.405	3	C79	81.23	285058096	-0.217417	BTD
NP_000929.1|	POLR2B	|POLR2B|5431|P30876|DNA-directed RNA polymerase II subunit RPB2 [Homo sapiens]	DCQIAHGAAQFLR	DC[+418.1]QIAHGAAQFLR	DC#QIAHGAAQFLR	616.615	3	C1093	71.51	120135272	-0.295535	BTD
NP_001230587.1|	GLRX	|GLRX|2745|P35754|glutaredoxin-1 [Homo sapiens]	DCIGGCSDLVSLQQSGELLTR	DC[+57]IGGC[+418.1]SDLVSLQQSGELLTR	DCIGGC#SDLVSLQQSGELLTR	1335.1	2	C83	81.25	46418412	-0.330452	BTD
NP_004423.2|	ELAVL2	|ELAVL2|1993|Q12926|ELAV-like protein 2 isoform a [Homo sapiens]	DFNTNKCK	DFNTNKC[+418.1]K	DFNTNKC#K	694.292	2	C316	47.5	374252536	-0.175169	BTD
NP_004896.1|	PRDX6	|PRDX6|9588|P30041|peroxiredoxin-6 [Homo sapiens]	DFTPVCTTELGR	DFTPVC[+418.1]TTELGR	DFTPVC#TTELGR	878.887	2	C47	72.64	312798736	-0.204277	BTD
NP_001093.1|	ACTN1	|ACTN1|87|P12814|alpha-actinin-1 isoform b [Homo sapiens]	DGLGFCALIHR	DGLGFC[+418.1]ALIHR	DGLGFC#ALIHR	540.587	3	C180	78.89	90373302	-0.309632	BTD
NP_001393.1|	EEF1A1	|EEF1A1|1915|P68104;Q6IPS9|elongation factor 1-alpha 1 [Homo sapiens]	DGNASGTTLLEALDCILPPTRPTDKPLR	DGNASGTTLLEALDC[+418.1]ILPPTRPTDKPLR	DGNASGTTLLEALDC#ILPPTRPTDKPLR	1128.23	3	C234	91.53	118261176	-0.296423	BTD
NP_001393.1|	EEF1A1	|EEF1A1|1915|P68104;Q6IPS9|elongation factor 1-alpha 1 [Homo sapiens]	DGNASGTTLLEALDCILPPTRPTDKPLR	DGNASGTTLLEALDC[+418.1]ILPPTRPTDKPLR	DGNASGTTLLEALDC#ILPPTRPTDKPLR	846.425	4	C234	91.53	822933088	0.037354	BTD
NP_060707.2|	CCAR1	|CCAR1|55749|Q8IX12|cell division cycle and apoptosis regulator protein 1 [Homo sapiens]	DINRYCK	DINRYC[+418.1]K	DINRYC#K	443.862	3	C903	52.78	247873096	-0.23503	BTD
NP_005795.2|	DDX39A	|DDX39A|10212|O00148|ATP-dependent RNA helicase DDX39A [Homo sapiens]	DIRPVCR	DIRPVC[+418.1]R	DIRPVC#R	638.8	2	C238	55.44	1508399104	0.362034	BTD
NP_005795.2|	DDX39A	|DDX39A|10212|O00148|ATP-dependent RNA helicase DDX39A [Homo sapiens]	DIRPVCR	DIRPVC[+418.1]R	DIRPVC#R	426.202	3	C238	55.44	2680580864	0.917252	BTD
NP_056315.1|	C2CD2	|C2CD2|25966|Q9Y426|C2 domain-containing protein 2 isoform 1 precursor [Homo sapiens]	DISVQAIACR	DISVQAIAC[+418.1]R	DISVQAIAC#R	747.347	2	C463	71.63	291500896	-0.214365	BTD
NP_001242941.1|	MYH10	|MYH10|4628|P35580;F8VTL3;G1UI33;Q4LE45;Q9BWG0|myosin-10 isoform 1 [Homo sapiens]	DKADFCIIHYAGK	DKADFC[+418.1]IIHYAGK	DKADFC#IIHYAGK	633.624	3	C586	70.14	247706912	-0.235109	BTD
NP_005959.2|	HNRNPM	|HNRNPM|4670|P52272|heterogeneous nuclear ribonucleoprotein M isoform a [Homo sapiens]	DKFNECGHVLYADIK	DKFNEC[+418.1]GHVLYADIK	DKFNEC#GHVLYADIK	723.996	3	C676	64.8	147936480	-0.282367	BTD
NP_000997.1|	RPS3A	|RPS3A|6189|P61247|40S ribosomal protein S3a isoform 1 [Homo sapiens]	DKMCSMVK	DKM[+16]C[+418.1]SM[+16]VK	DKMC#SMVK	696.277	2	C111	40.49	1815903168	0.507687	BTD
NP_000997.1|	RPS3A	|RPS3A|6189|P61247|40S ribosomal protein S3a isoform 1 [Homo sapiens]	DKMCSMVK	DKM[+16]C[+418.1]SM[+16]VK	DKMC#SMVK	464.52	3	C111	40.49	2631130880	-0.289304	BTD
NP_000997.1|	RPS3A	|RPS3A|6189|P61247|40S ribosomal protein S3a isoform 1 [Homo sapiens]	DKMCSMVK	DKMC[+418.1]SM[+16]VK	DKMC#SMVK	688.279	2	C111	47.87	133290368	0.893829	BTD
NP_659424.2|	U2AF1L4	|U2AF1L4|199746|Q8WU68|splicing factor U2AF 26 kDa subunit isoform 2 [Homo sapiens]	DKVNCSFYFK	DKVNC[+418.1]SFYFK	DKVNC#SFYFK	556.911	3	C18	65.73	270745352	-0.224197	BTD
NP_056450.2|	GAPVD1	|GAPVD1|26130|Q14C86;B3KN67|GTPase-activating protein and VPS9 domain-containing protein 1 [Homo sapiens]	DKVQCILR	DKVQC[+418.1]ILR	DKVQC#ILR	464.897	3	C1405	65.34	528982480	-0.101879	BTD
NP_008835.5|	PRKDC	|PRKDC|5591|P78527|DNA-dependent protein kinase catalytic subunit isoform 1 [Homo sapiens]	DLCNTHLMR	DLC[+418.1]NTHLM[+16]R	DLC#NTHLMR	768.823	2	C1364	56.67	173877240	-0.270079	BTD
NP_008835.5|	PRKDC	|PRKDC|5591|P78527|DNA-dependent protein kinase catalytic subunit isoform 1 [Homo sapiens]	DLCNTHLMR	DLC[+418.1]NTHLM[+16]R	DLC#NTHLMR	512.885	3	C1364	56.67	539113792	-0.0970805	BTD
NP_001952.1|	EEF2	|EEF2|1938|P13639|elongation factor 2 [Homo sapiens]	DLEEDHACIPIKK	DLEEDHAC[+418.1]IPIKK	DLEEDHAC#IPIKK	482.977	4	C567	57.48	124222456	-0.293599	BTD
NP_003391.1|	XPO1	|XPO1|7514|O14980;B3KWD0|exportin-1 [Homo sapiens]	DLLGLCEQK	DLLGLC[+418.1]EQK	DLLGLC#EQK	718.831	2	C528	78.32	46321558	-0.330498	BTD
NP_001073027.1|	HNRNPUL2	|HNRNPUL2|221092|Q1KMD3|heterogeneous nuclear ribonucleoprotein U-like protein 2 [Homo sapiens]	DLLVQQASQCLSK	DLLVQQASQC[+418.1]LSK	DLLVQQASQC#LSK	925.942	2	C518	77.09	59011306	-0.324487	BTD
NP_001073027.1|	HNRNPUL2	|HNRNPUL2|221092|Q1KMD3|heterogeneous nuclear ribonucleoprotein U-like protein 2 [Homo sapiens]	DLLVQQASQCLSK	DLLVQQASQC[+418.1]LSK	DLLVQQASQC#LSK	617.631	3	C518	77.09	54118614	-0.326805	BTD
NP_001160005.1|	DDX4	|DDX4|54514|Q9NQI0;D6RDK4|probable ATP-dependent RNA helicase DDX4 isoform 3 [Homo sapiens]	DLMACAQTGSGK	DLM[+16]AC[+418.1]AQTGSGK	DLMAC#AQTGSGK	808.331	2	C311	55.88	24959607	-0.340616	BTD
NP_005511.1|	HNRNPH1	|HNRNPH1|3187|P31943|heterogeneous nuclear ribonucleoprotein H [Homo sapiens]	DLNYCFSGMSDHR	DLNYC[+418.1]FSGM[+16]SDHR	DLNYC#FSGMSDHR	989.879	2	C267	65.8	163731752	-0.274885	BTD
NP_005511.1|	HNRNPH1	|HNRNPH1|3187|P31943|heterogeneous nuclear ribonucleoprotein H [Homo sapiens]	DLNYCFSGMSDHR	DLNYC[+418.1]FSGM[+16]SDHR	DLNYC#FSGMSDHR	660.255	3	C267	65.8	819606880	0.0357785	BTD
NP_004957.1|	HNRNPF	|HNRNPF|3185|P52597|heterogeneous nuclear ribonucleoprotein F [Homo sapiens]	DLSYCLSGMYDHR	DLSYC[+418.1]LSGM[+16]YDHR	DLSYC#LSGMYDHR	665.267	3	C267	68.95	669522464	-0.0353108	BTD
NP_004850.1|	CLTC	|CLTC|1213|Q00610|clathrin heavy chain 1 [Homo sapiens]	DPHLACVAYER	DPHLAC[+418.1]VAYER	DPHLAC#VAYER	846.369	2	C918	61.53	250504920	-0.233784	BTD
NP_004850.1|	CLTC	|CLTC|1213|Q00610|clathrin heavy chain 1 [Homo sapiens]	DPHLACVAYER	DPHLAC[+418.1]VAYER	DPHLAC#VAYER	564.582	3	C918	61.53	566736064	-0.0839969	BTD
NP_009193.2|	PARK7	|PARK7|11315|Q99497|protein DJ-1 [Homo sapiens]	DPVQCSR	DPVQC[+418.1]SR	DPVQC#SR	611.753	2	C46	51.07	48559380	-0.329438	BTD
NP_002694.3|	PPAT	|PPAT|5471|Q06203;A8K4H7;Q59G63|amidophosphoribosyltransferase proprotein [Homo sapiens]	DPYGNRPLCIGR	DPYGNRPLC[+418.1]IGR	DPYGNRPLC#IGR	593.608	3	C207	63.34	535179632	-0.098944	BTD
NP_000843.1|	GSTP1	|GSTP1|2950|P09211|glutathione S-transferase P [Homo sapiens]	DQQEAALVDMVNDGVEDLRCK	DQQEAALVDM[+16]VNDGVEDLRC[+418.1]K	DQQEAALVDMVNDGVEDLRC#K	928.075	3	C102	73.55	401400320	-0.16231	BTD
NP_068751.4|	RIC8A	|RIC8A|60626|Q9NPQ8|synembryn-A [Homo sapiens]	DRNCLDPFTSR	DRNC[+418.1]LDPFTSR	DRNC#LDPFTSR	581.252	3	C79	71.81	151693032	-0.280587	BTD
NP_065801.1|	XPO5	|XPO5|57510|Q9HAV4|exportin-5 [Homo sapiens]	DSLDQFDCK	DSLDQFDC[+418.1]K	DSLDQFDC#K	744.792	2	C1131	65.98	43719506	-0.33173	BTD
NP_002296.1|	LGALS1	|LGALS1|3956|P09382|galectin-1 [Homo sapiens]	DSNNLCLHFNPR	DSNNLC[+418.1]LHFNPR	DSNNLC#LHFNPR	924.401	2	C43	67.19	245683552	-0.236067	BTD
NP_002296.1|	LGALS1	|LGALS1|3956|P09382|galectin-1 [Homo sapiens]	DSNNLCLHFNPR	DSNNLC[+418.1]LHFNPR	DSNNLC#LHFNPR	616.603	3	C43	67.19	1653465664	0.430746	BTD
NP_060598.3|	TSR1	|TSR1|55720|Q2NL82|pre-rRNA-processing protein TSR1 homolog [Homo sapiens]	DTGTVHLNELGNTQNFMLLCPR	DTGTVHLNELGNTQNFM[+16]LLC[+418.1]PR	DTGTVHLNELGNTQNFMLLC#PR	969.779	3	C126	80.77	1079345024	0.158807	BTD
NP_060598.3|	TSR1	|TSR1|55720|Q2NL82|pre-rRNA-processing protein TSR1 homolog [Homo sapiens]	DTGTVHLNELGNTQNFMLLCPR	DTGTVHLNELGNTQNFM[+16]LLC[+418.1]PR	DTGTVHLNELGNTQNFMLLC#PR	727.586	4	C126	80.77	347746720	-0.187724	BTD
NP_055140.1|	CORO1C	|CORO1C|23603|Q9ULV4|coronin-1C isoform 1 [Homo sapiens]	DTICNQDER	DTIC[+418.1]NQDER	DTIC#NQDER	756.298	2	C456	54.32	100341036	-0.304911	BTD
NP_078938.2|	NAT10	|NAT10|55226|Q9H0A0|N-acetyltransferase 10 isoform a [Homo sapiens]	DTLFCYHK	DTLFC[+418.1]YHK	DTLFC#YHK	722.805	2	C517	65.36	198709592	-0.258317	BTD
NP_624358.2|	NUP98	|NUP98|4928|P52948|nuclear pore complex protein Nup98-Nup96 isoform 4 [Homo sapiens]	DVCFHLLK	DVC[+418.1]FHLLK	DVC#FHLLK	464.886	3	C1475	72.73	113064624	-0.298884	BTD
NP_003175.1|	TAF2	|TAF2|6873|Q6P1X5;B3KMD8|transcription initiation factor TFIID subunit 2 [Homo sapiens]	DVHNLCPK	DVHNLC[+418.1]PK	DVHNLC#PK	672.297	2	C767	58.06	278424272	-0.220559	BTD
NP_003175.1|	TAF2	|TAF2|6873|Q6P1X5;B3KMD8|transcription initiation factor TFIID subunit 2 [Homo sapiens]	DVHNLCPK	DVHNLC[+418.1]PK	DVHNLC#PK	448.534	3	C767	58.06	316446464	-0.20255	BTD
NP_001007.2|	RPS12	|RPS12|6206|P25398|40S ribosomal protein S12 [Homo sapiens]	DVIEEYFKCK	DVIEEYFKC[+418.1]K	DVIEEYFKC#K	846.376	2	C130	72.99	501643168	-0.114829	BTD
NP_001007.2|	RPS12	|RPS12|6206|P25398|40S ribosomal protein S12 [Homo sapiens]	DVIEEYFKCK	DVIEEYFKC[+418.1]K	DVIEEYFKC#K	564.586	3	C130	72.99	771264256	0.0128804	BTD
NP_001006.1|	RPS11	|RPS11|6205|P62280|40S ribosomal protein S11 [Homo sapiens]	DVQIGDIVTVGECRPLSK	DVQIGDIVTVGEC[+418.1]RPLSK	DVQIGDIVTVGEC#RPLSK	783.052	3	C131	75.32	153960128	-0.279513	BTD
NP_898829.1|	CREM	|CREM|1390|E9PHM1;Q14501|cAMP-responsive element modulator isoform 21 [Homo sapiens]	EAARECR	EAAREC[+418.1]R	EAAREC#R	418.178	3	C258	38.82	335255152	-0.193641	BTD
NP_003698.1|	RUVBL1	|RUVBL1|8607|Q9Y265|ruvB-like 1 [Homo sapiens]	EACGVIVELIK	EAC[+418.1]GVIVELIK	EAC#GVIVELIK	796.397	2	C49	83.7	24433165	-0.340865	BTD
NP_005372.2|	NCL	|NCL|4691|P19338;B3KM80|nucleolin [Homo sapiens]	EALNSCNK	EALNSC[+418.1]NK	EALNSC#NK	648.771	2	C543	49.29	83285208	-0.312989	BTD
NP_004437.2|	EPRS	|EPRS|2058|P07814|bifunctional glutamate/proline--tRNA ligase [Homo sapiens]	EAPCVLIYIPDGHTK	EAPC[+418.1]VLIYIPDGHTK	EAPC#VLIYIPDGHTK	691.997	3	C697	79.09	102148012	-0.304055	BTD
NP_056315.1|	C2CD2	|C2CD2|25966|Q9Y426|C2 domain-containing protein 2 isoform 1 precursor [Homo sapiens]	EAQNLQCAASTAQESCPPKPPR	EAQNLQC[+418.1]AASTAQESC[+57]PPKPPR	EAQNLQC#AASTAQESCPPKPPR	934.42	3	C244	51.89	445202192	-0.141563	BTD
NP_000969.1|	RPL23	|RPL23|9349|P62829|60S ribosomal protein L23 [Homo sapiens]	ECADLWPR	EC[+418.1]ADLWPR	EC#ADLWPR	704.295	2	C125	72.07	234377424	-0.241423	BTD
NP_689880.1|	NANP	|NANP|140838|Q8TBE9|N-acylneuraminate-9-phosphatase [Homo sapiens]	ECFHPYNTCITDLR	EC[+57]FHPYNTC[+418.1]ITDLR	ECFHPYNTC#ITDLR	729.641	3	C67	69.24	81609016	-0.313783	BTD
NP_001243546.1|	TUBGCP2	|TUBGCP2|10844|B7ZKL8;F5H4L0|gamma-tubulin complex component 2 isoform 1 [Homo sapiens]	ECGHDVTCPVAK	EC[+57]GHDVTC[+418.1]PVAK	ECGHDVTC#PVAK	578.574	3	C497	51.69	271201080	-0.223981	BTD
NP_705935.1|	TPM3	|TPM3|7170|P06753|tropomyosin alpha-3 chain isoform 2 [Homo sapiens]	EEHLCTQR	EEHLC[+418.1]TQR	EEHLC#TQR	717.3	2	C233	47.69	176743600	-0.268722	BTD
NP_705935.1|	TPM3	|TPM3|7170|P06753|tropomyosin alpha-3 chain isoform 2 [Homo sapiens]	EEHLCTQR	EEHLC[+418.1]TQR	EEHLC#TQR	478.536	3	C233	47.69	518471872	-0.106858	BTD
NP_001447.2|	FLNA	|FLNA|2316|P21333;Q60FE5;Q6NXF2|filamin-A isoform 1 [Homo sapiens]	EEPCLLK	EEPC[+418.1]LLK	EEPC#LLK	625.283	2	C1989	68.87	458686080	-0.135176	BTD
NP_001142.2|	SLC25A4	|SLC25A4|291|P12235|ADP/ATP translocase 1 [Homo sapiens]	EFHGLGDCIIK	EFHGLGDC[+418.1]IIK	EFHGLGDC#IIK	825.376	2	C160	71.63	223889040	-0.246391	BTD
NP_001142.2|	SLC25A4	|SLC25A4|291|P12235|ADP/ATP translocase 1 [Homo sapiens]	EFHGLGDCIIK	EFHGLGDC[+418.1]IIK	EFHGLGDC#IIK	550.587	3	C160	71.63	612537984	-0.0623022	BTD
NP_001025.1|	RRM2	|RRM2|6241|P31350|ribonucleoside-diphosphate reductase subunit M2 isoform 2 [Homo sapiens]	EFLFNAIETMPCVK	EFLFNAIETM[+16]PC[+418.1]VK	EFLFNAIETMPC#VK	692.647	3	C202	82.08	41218368	-0.332915	BTD
NP_055037.1|	NDUFA8	|NDUFA8|4702|P51970;B1AM93|NADH dehydrogenase [ubiquinone] 1 alpha subcomplex subunit 8 [Homo sapiens]	EFMLCR	EFM[+16]LC[+418.1]R	EFMLC#R	616.748	2	C46	70.12	238382688	-0.239526	BTD
NP_001952.1|	EEF2	|EEF2|1938|P13639|elongation factor 2 [Homo sapiens]	EGALCEENMR	EGALC[+418.1]EENM[+16]R	EGALC#EENMR	793.308	2	C693	56.08	140302488	-0.285982	BTD
NP_004915.2|	ACTN4	|ACTN4|81|O43707|alpha-actinin-4 [Homo sapiens]	EGLLLWCQR	EGLLLWC[+418.1]QR	EGLLLWC#QR	768.36	2	C173	82.87	63592570	-0.322317	BTD
NP_004184.1|	GBF1	|GBF1|8729|Q92538|Golgi-specific brefeldin A-resistance guanine nucleotide exchange factor 1 isoform 1 [Homo sapiens]	EGTALVPYGLPCIR	EGTALVPYGLPC[+418.1]IR	EGTALVPYGLPC#IR	953.963	2	C403	84.04	36343001	-0.335224	BTD
NP_005909.2|	MDH2	|MDH2|4191|P40926|malate dehydrogenase, mitochondrial precursor [Homo sapiens]	EGVVECSFVK	EGVVEC[+418.1]SFVK	EGVVEC#SFVK	757.836	2	C275	68.5	113144512	-0.298846	BTD
NP_055680.3|	NCAPD2	|NCAPD2|9918|Q15021;B3KMS0;B3KY03|condensin complex subunit 1 [Homo sapiens]	EIGQKCPQELSR	EIGQKC[+418.1]PQELSR	EIGQKC#PQELSR	602.615	3	C286	51.09	366367744	-0.178904	BTD
NP_006827.1|	GCN1L1	|GCN1L1|10985|Q92616|translational activator GCN1 [Homo sapiens]	EILSELGKCVAGK	EILSELGKC[+418.1]VAGK	EILSELGKC#VAGK	882.937	2	C36	71.63	107233492	-0.301646	BTD
NP_006827.1|	GCN1L1	|GCN1L1|10985|Q92616|translational activator GCN1 [Homo sapiens]	EILSELGKCVAGK	EILSELGKC[+418.1]VAGK	EILSELGKC#VAGK	588.96	3	C36	71.63	247770728	-0.235079	BTD
NP_004631.1|	DDX39B	|DDX39B|7919|Q13838|spliceosome RNA helicase DDX39B [Homo sapiens]	EIRPVCR	EIRPVC[+418.1]R	EIRPVC#R	430.874	3	C239	52.61	1652461120	0.43027	BTD
NP_821133.1|	TUBB	|TUBB|203068|P07437;Q5SU16|tubulin beta chain [Homo sapiens]	EIVHIQAGQCGNQIGAK	EIVHIQAGQC[+418.1]GNQIGAK	EIVHIQAGQC#GNQIGAK	1092.52	2	C12	57.63	2039911616	0.613791	BTD
NP_821133.1|	TUBB	|TUBB|203068|P07437;Q5SU16|tubulin beta chain [Homo sapiens]	EIVHIQAGQCGNQIGAK	EIVHIQAGQC[+418.1]GNQIGAK	EIVHIQAGQC#GNQIGAK	728.682	3	C12	57.63	16987932160	7.69411	BTD
NP_006078.2|	TUBB4A	|TUBB4A|10382|P04350|tubulin beta-4A chain [Homo sapiens]	EIVHLQAGQCGNQIGAK	EIVHLQAGQC[+418.1]GNQIGAK	EIVHLQAGQC#GNQIGAK	1092.52	2	C12	57.63	2052768896	0.619881	BTD
NP_006078.2|	TUBB4A	|TUBB4A|10382|P04350|tubulin beta-4A chain [Homo sapiens]	EIVHLQAGQCGNQIGAK	EIVHLQAGQC[+418.1]GNQIGAK	EIVHLQAGQC#GNQIGAK	728.682	3	C12	57.63	17058929152	7.72774	BTD
NP_065073.3|	KIAA1244	|KIAA1244|57221|Q5TH69;C5NM88|brefeldin A-inhibited guanine nucleotide-exchange protein 3 [Homo sapiens]	EKCLLPLQLALESK	EKC[+418.1]LLPLQLALESK	EKC#LLPLQLALESK	668.35	3	C49	83.21	36642367	-0.335082	BTD
NP_065801.1|	XPO5	|XPO5|57510|Q9HAV4|exportin-5 [Homo sapiens]	EKCPICVPCGLR	EKC[+418.1]PIC[+57]VPC[+57]GLR	EKC#PICVPCGLR	617.279	3	C44	64.1	309221568	-0.205972	BTD
NP_057107.3|	OTUD6B	|OTUD6B|51633|Q8N6M0|OTU domain-containing protein 6B [Homo sapiens]	EKDCALTVVALR	EKDC[+418.1]ALTVVALR	EKDC#ALTVVALR	579.288	3	C202	70.4	118542116	-0.29629	BTD
NP_003283.2|	TPR	|TPR|7175|P12270;Q99968|nucleoprotein TPR [Homo sapiens]	EKGNEILELKCNLENK	EKGNEILELKC[+418.1]NLENK	EKGNEILELKC#NLENK	764.705	3	C224	61.65	203325416	-0.256131	BTD
NP_003283.2|	TPR	|TPR|7175|P12270;Q99968|nucleoprotein TPR [Homo sapiens]	EKGNEILELKCNLENK	EKGNEILELKC[+418.1]NLENK	EKGNEILELKC#NLENK	573.78	4	C224	61.65	105821340	-0.302315	BTD
NP_612510.1|	TECR	|TECR|9524|Q9NZ01|trans-2,3-enoyl-CoA reductase [Homo sapiens]	EKLCFLDK	EKLC[+418.1]FLDK	EKLC#FLDK	707.331	2	C18	71.11	269381528	-0.224843	BTD
NP_612510.1|	TECR	|TECR|9524|Q9NZ01|trans-2,3-enoyl-CoA reductase [Homo sapiens]	EKLCFLDK	EKLC[+418.1]FLDK	EKLC#FLDK	471.89	3	C18	71.11	636609024	-0.0509007	BTD
NP_612510.1|	TECR	|TECR|9524|Q9NZ01|trans-2,3-enoyl-CoA reductase [Homo sapiens]	EKLCFLDKVEPHATIAEIK	EKLC[+418.1]FLDKVEPHATIAEIK	EKLC#FLDKVEPHATIAEIK	651.332	4	C18	74.83	337275984	-0.192684	BTD
NP_001605.1|	ACTG1	|ACTG1|71|P63261|actin, cytoplasmic 2 [Homo sapiens]	EKLCYVALDFEQEMATAASSSSLEK	EKLC[+418.1]YVALDFEQEM[+16]ATAASSSSLEK	EKLC#YVALDFEQEMATAASSSSLEK	1062.14	3	C217	78.07	319723664	-0.200997	BTD
NP_005889.3|	CAPRIN1	|CAPRIN1|4076|Q14444|caprin-1 isoform 1 [Homo sapiens]	EKPVCGTTYK	EKPVC[+418.1]GTTYK	EKPVC#GTTYK	772.35	2	C226	47.98	293287504	-0.213519	BTD
NP_005889.3|	CAPRIN1	|CAPRIN1|4076|Q14444|caprin-1 isoform 1 [Homo sapiens]	EKPVCGTTYK	EKPVC[+418.1]GTTYK	EKPVC#GTTYK	515.236	3	C226	47.98	861035776	0.0554018	BTD
NP_005861.2|	SAP18	|SAP18|10284|O00422|histone deacetylase complex subunit SAP18 [Homo sapiens]	EKTCPLLLR	EKTC[+418.1]PLLLR	EKTC#PLLLR	745.878	2	C45	66.91	361091552	-0.181403	BTD
NP_000170.1|	MSH6	|MSH6|2956|P52701;Q3SWU9|DNA mismatch repair protein Msh6 [Homo sapiens]	ELAETIKCR	ELAETIKC[+418.1]R	ELAETIKC#R	494.236	3	C1241	55.37	155981344	-0.278556	BTD
NP_036256.2|	CHORDC1	|CHORDC1|26973|Q9UHD1|cysteine and histidine-rich domain-containing protein 1 isoform a [Homo sapiens]	ELCELKPK	ELC[+418.1]ELKPK	ELC#ELKPK	459.89	3	C86	56.89	803188064	0.0280016	BTD
NP_004578.2|	RRBP1	|RRBP1|6238|Q9P2E9|ribosome-binding protein 1 [Homo sapiens]	ELCHTQSSHASLR	ELC[+418.1]HTQSSHASLR	ELC#HTQSSHASLR	629.614	3	C459	45.91	373942560	-0.175316	BTD
NP_006588.1|	HSPA8	|HSPA8|3312|P11142;Q53HF2|heat shock cognate 71 kDa protein isoform 1 [Homo sapiens]	ELEKVCNPIITK	ELEKVC[+418.1]NPIITK	ELEKVC#NPIITK	902.952	2	C603	62.34	518902528	-0.106654	BTD
NP_006588.1|	HSPA8	|HSPA8|3312|P11142;Q53HF2|heat shock cognate 71 kDa protein isoform 1 [Homo sapiens]	ELEKVCNPIITK	ELEKVC[+418.1]NPIITK	ELEKVC#NPIITK	602.304	3	C603	62.34	993862176	0.118317	BTD
NP_000985.1|	RPL32	|RPL32|6161|P62910|60S ribosomal protein L32 [Homo sapiens]	ELEVLLMCNK	ELEVLLM[+16]C[+418.1]NK	ELEVLLMC#NK	813.372	2	C91	74.79	285617528	-0.217152	BTD
NP_000985.1|	RPL32	|RPL32|6161|P62910|60S ribosomal protein L32 [Homo sapiens]	ELEVLLMCNK	ELEVLLM[+16]C[+418.1]NK	ELEVLLMC#NK	542.584	3	C91	74.79	143056432	-0.284678	BTD
NP_008938.2|	CPSF6	|CPSF6|11052|Q16630|cleavage and polyadenylation specificity factor subunit 6 [Homo sapiens]	ELHGQNPVVTPCNK	ELHGQNPVVTPC[+418.1]NK	ELHGQNPVVTPC#NK	651.97	3	C159	53.71	324033024	-0.198956	BTD
NP_071757.4|	MMS19	|MMS19|64210|Q96T76|MMS19 nucleotide excision repair protein homolog [Homo sapiens]	ELLELSCCHSCPFSSTAAAK	ELLELSC[+57]C[+57]HSC[+418.1]PFSSTAAAK	ELLELSCCHSC#PFSSTAAAK	877.045	3	C750	70.23	198577824	-0.25838	BTD
NP_008835.5|	PRKDC	|PRKDC|5591|P78527|DNA-dependent protein kinase catalytic subunit isoform 1 [Homo sapiens]	ELLNPVVEFVSHPSTTCR	ELLNPVVEFVSHPSTTC[+418.1]R	ELLNPVVEFVSHPSTTC#R	816.056	3	C2469	80.76	1175888320	0.204536	BTD
NP_008835.5|	PRKDC	|PRKDC|5591|P78527|DNA-dependent protein kinase catalytic subunit isoform 1 [Homo sapiens]	ELLNPVVEFVSHPSTTCR	ELLNPVVEFVSHPSTTC[+418.1]R	ELLNPVVEFVSHPSTTC#R	612.294	4	C2469	80.76	235706384	-0.240793	BTD
NP_005264.2|	GNB2	|GNB2|2783|P62879;Q6FHM2|guanine nucleotide-binding protein G(I)/G(S)/G(T) subunit beta-2 [Homo sapiens]	ELPGHTGYLSCCR	ELPGHTGYLSC[+418.1]C[+57]R	ELPGHTGYLSC#CR	637.604	3	C148	57.39	670160832	-0.0350085	BTD
NP_036450.1|	LETM1	|LETM1|3954|O95202|LETM1 and EF-hand domain-containing protein 1, mitochondrial precursor [Homo sapiens]	ELQAACR	ELQAAC[+418.1]R	ELQAAC#R	604.763	2	C379	54.38	174246544	-0.269904	BTD
NP_001027454.1|	TMPO	|TMPO|7112|P42167;Q59G12|thymopoietin isoform beta [Homo sapiens]	EMFPYEASTPTGISASCR	EM[+16]FPYEASTPTGISASC[+418.1]R	EMFPYEASTPTGISASC#R	1191	2	C363	68.77	175044808	-0.269526	BTD
NP_001027454.1|	TMPO	|TMPO|7112|P42167;Q59G12|thymopoietin isoform beta [Homo sapiens]	EMFPYEASTPTGISASCR	EM[+16]FPYEASTPTGISASC[+418.1]R	EMFPYEASTPTGISASC#R	794.334	3	C363	68.77	555340880	-0.0893944	BTD
NP_000929.1|	POLR2B	|POLR2B|5431|P30876|DNA-directed RNA polymerase II subunit RPB2 [Homo sapiens]	EMLPHVGVSDFCETKK	EM[+16]LPHVGVSDFC[+418.1]ETKK	EMLPHVGVSDFC#ETKK	564.255	4	C357	63.55	156305296	-0.278403	BTD
NP_036205.1|	CCT5	|CCT5|22948|P48643|T-complex protein 1 subunit epsilon [Homo sapiens]	EMNPALGIDCLHK	EM[+16]NPALGIDC[+418.1]LHK	EMNPALGIDC#LHK	625.613	3	C493	64.15	507262864	-0.112167	BTD
NP_006539.3|	IGF2BP2	|IGF2BP2|10644|Q9Y6M1|insulin-like growth factor 2 mRNA-binding protein 2 isoform a [Homo sapiens]	ENSGAAEKPVTIHATPEGTSEACR	ENSGAAEKPVTIHATPEGTSEAC[+418.1]R	ENSGAAEKPVTIHATPEGTSEAC#R	958.432	3	C255	49.33	138259696	-0.28695	BTD
NP_006539.3|	IGF2BP2	|IGF2BP2|10644|Q9Y6M1|insulin-like growth factor 2 mRNA-binding protein 2 isoform a [Homo sapiens]	ENSGAAEKPVTIHATPEGTSEACR	ENSGAAEKPVTIHATPEGTSEAC[+418.1]R	ENSGAAEKPVTIHATPEGTSEAC#R	719.076	4	C255	49.33	662001664	-0.0388731	BTD
NP_001295.2|	CPD	|CPD|1362|O75976|carboxypeptidase D isoform 1 precursor [Homo sapiens]	ENSQMFQGRPCK	ENSQM[+16]FQGRPC[+418.1]K	ENSQMFQGRPC#K	620.26	3	C720	46.61	333802560	-0.194329	BTD
NP_055040.2|	PPP2R1A	|PPP2R1A|5518|P30153;A8K7B7|serine/threonine-protein phosphatase 2A 65 kDa regulatory subunit A alpha isoform [Homo sapiens]	ENVIMSQILPCIK	ENVIM[+16]SQILPC[+418.1]IK	ENVIMSQILPC#IK	961.465	2	C329	80.33	118711636	-0.296209	BTD
NP_055040.2|	PPP2R1A	|PPP2R1A|5518|P30153;A8K7B7|serine/threonine-protein phosphatase 2A 65 kDa regulatory subunit A alpha isoform [Homo sapiens]	ENVIMSQILPCIK	ENVIM[+16]SQILPC[+418.1]IK	ENVIMSQILPC#IK	641.312	3	C329	80.33	84303708	-0.312507	BTD
NP_006326.1|	TIMM17A	|TIMM17A|10440|Q99595|mitochondrial import inner membrane translocase subunit Tim17-A [Homo sapiens]	EPCPWR	EPC[+418.1]PWR	EPC#PWR	603.247	2	C9	64.23	857136992	0.0535551	BTD
NP_060282.1|	CHCHD3	|CHCHD3|54927|Q9NX63;A4D1N4|coiled-coil-helix-coiled-coil-helix domain-containing protein 3, mitochondrial precursor [Homo sapiens]	ERICSEEER	ERIC[+418.1]SEEER	ERIC#SEEER	784.827	2	C112	46.31	89726284	-0.309939	BTD
NP_060282.1|	CHCHD3	|CHCHD3|54927|Q9NX63;A4D1N4|coiled-coil-helix-coiled-coil-helix domain-containing protein 3, mitochondrial precursor [Homo sapiens]	ERICSEEER	ERIC[+418.1]SEEER	ERIC#SEEER	523.554	3	C112	46.31	259827496	-0.229368	BTD
NP_056044.3|	KIAA0664	|KIAA0664|23277|O75153|protein KIAA0664 [Homo sapiens]	ERPLCPLQPQNR	ERPLC[+418.1]PLQPQNR	ERPLC#PLQPQNR	623.635	3	C200	63.29	762255136	0.00861316	BTD
NP_002818.1|	PTPN1	|PTPN1|5770|P18031;A8K3M3|tyrosine-protein phosphatase non-receptor type 1 [Homo sapiens]	ESGSLSPEHGPVVVHCSAGIGR	ESGSLSPEHGPVVVHC[+418.1]SAGIGR	ESGSLSPEHGPVVVHC#SAGIGR	865.069	3	C215	57.01	1028319616	0.134638	BTD
NP_002818.1|	PTPN1	|PTPN1|5770|P18031;A8K3M3|tyrosine-protein phosphatase non-receptor type 1 [Homo sapiens]	ESGSLSPEHGPVVVHCSAGIGR	ESGSLSPEHGPVVVHC[+418.1]SAGIGR	ESGSLSPEHGPVVVHC#SAGIGR	649.054	4	C215	57.01	2321338752	0.747093	BTD
NP_001073867.1|	KIAA0368	|KIAA0368|23392|-|proteasome-associated protein ECM29 homolog [Homo sapiens]	ESSCLALNDLLR	ESSC[+418.1]LALNDLLR	ESSC#LALNDLLR	876.408	2	C1355	83.74	101777360	-0.30423	BTD
NP_056044.3|	KIAA0664	|KIAA0664|23277|O75153|protein KIAA0664 [Homo sapiens]	ESSEYLKCLTQQAVALQR	ESSEYLKC[+418.1]LTQQAVALQR	ESSEYLKC#LTQQAVALQR	829.067	3	C1196	71.77	147105072	-0.28276	BTD
NP_002152.2|	IARS	|IARS|3376|P41252|isoleucine--tRNA ligase, cytoplasmic [Homo sapiens]	ESVDHLTIPSRCGK	ESVDHLTIPSRC[+418.1]GK	ESVDHLTIPSRC#GK	490.732	4	C512	55.1	128694956	-0.291481	BTD
NP_003343.1|	SUMO1	|SUMO1|7341|P63165|small ubiquitin-related modifier 1 isoform a precursor [Homo sapiens]	ESYCQR	ESYC[+418.1]QR	ESYC#QR	602.232	2	C52	51.05	90604780	-0.309522	BTD
NP_003282.2|	TPP2	|TPP2|7174|P29144|tripeptidyl-peptidase 2 [Homo sapiens]	ETGAASFLCR	ETGAASFLC[+418.1]R	ETGAASFLC#R	736.818	2	C28	71.49	302649056	-0.209085	BTD
NP_003282.2|	TPP2	|TPP2|7174|P29144|tripeptidyl-peptidase 2 [Homo sapiens]	ETGAASFLCR	ETGAASFLC[+418.1]R	ETGAASFLC#R	491.548	3	C28	71.49	58770856	-0.324601	BTD
NP_001679.2|	ATP5F1	|ATP5F1|515|P24539;Q08ET0|ATP synthase subunit b, mitochondrial precursor [Homo sapiens]	ETIAKCIADLK	ETIAKC[+418.1]IADLK	ETIAKC#IADLK	541.602	3	C239	73.33	48451522	-0.329489	BTD
NP_001952.1|	EEF2	|EEF2|1938|P13639|elongation factor 2 [Homo sapiens]	ETVSEESNVLCLSK	ETVSEESNVLC[+418.1]LSK	ETVSEESNVLC#LSK	978.44	2	C591	69.69	187992640	-0.263393	BTD
NP_001952.1|	EEF2	|EEF2|1938|P13639|elongation factor 2 [Homo sapiens]	ETVSEESNVLCLSK	ETVSEESNVLC[+418.1]LSK	ETVSEESNVLC#LSK	652.629	3	C591	69.69	139475280	-0.286374	BTD
NP_001460.1|	XRCC6	|XRCC6|2547|P12956;B1AHC8|X-ray repair cross-complementing protein 6 [Homo sapiens]	EVAALCR	EVAALC[+418.1]R	EVAALC#R	590.268	2	C398	63.11	482439328	-0.123925	BTD
NP_378669.1|	RPL36	|RPL36|25873|Q9Y3U8|60S ribosomal protein L36 [Homo sapiens]	EVCGFAPYER	EVC[+418.1]GFAPYER	EVC#GFAPYER	794.832	2	C48	68.35	234789096	-0.241228	BTD
NP_777567.1|	PPP4R2	|PPP4R2|151987|Q9NY27|serine/threonine-protein phosphatase 4 regulatory subunit 2 [Homo sapiens]	EVCPVLDQFLCHVAK	EVC[+418.1]PVLDQFLC[+57]HVAK	EVC#PVLDQFLCHVAK	726.006	3	C22	89.44	170153816	-0.271843	BTD
NP_000296.2|	PON2	|PON2|5445|Q15165|serum paraoxonase/arylesterase 2 isoform 1 [Homo sapiens]	EVESVDLPHCHLIK	EVESVDLPHC[+418.1]HLIK	EVESVDLPHC#HLIK	509.995	4	C42	62.48	133847576	-0.28904	BTD
NP_695012.1|	UBA1	|UBA1|7317|P22314|ubiquitin-like modifier-activating enzyme 1 [Homo sapiens]	EVLTEDKCLQR	EVLTEDKC[+418.1]LQR	EVLTEDKC#LQR	876.408	2	C444	55.77	202054512	-0.256733	BTD
NP_695012.1|	UBA1	|UBA1|7317|P22314|ubiquitin-like modifier-activating enzyme 1 [Homo sapiens]	EVLTEDKCLQR	EVLTEDKC[+418.1]LQR	EVLTEDKC#LQR	584.608	3	C444	55.77	379719520	-0.17258	BTD
NP_004485.1|	HDGF	|HDGF|3068|P51858|hepatoma-derived growth factor isoform a [Homo sapiens]	EYKCGDLVFAK	EYKC[+418.1]GDLVFAK	EYKC#GDLVFAK	845.884	2	C12	65.75	250010352	-0.234018	BTD
NP_004485.1|	HDGF	|HDGF|3068|P51858|hepatoma-derived growth factor isoform a [Homo sapiens]	EYKCGDLVFAK	EYKC[+418.1]GDLVFAK	EYKC#GDLVFAK	564.258	3	C12	65.75	819776864	0.035859	BTD
NP_898829.1|	CREM	|CREM|1390|E9PHM1;Q14501|cAMP-responsive element modulator isoform 21 [Homo sapiens]	EYVKCLENR	EYVKC[+418.1]LENR	EYVKC#LENR	786.353	2	C268	55.07	92543804	-0.308604	BTD
NP_898829.1|	CREM	|CREM|1390|E9PHM1;Q14501|cAMP-responsive element modulator isoform 21 [Homo sapiens]	EYVKCLENR	EYVKC[+418.1]LENR	EYVKC#LENR	524.571	3	C268	55.07	214703728	-0.250741	BTD
NP_998776.1|	SLC25A3	|SLC25A3|5250|Q00325;Q6MZF9|phosphate carrier protein, mitochondrial isoform b precursor [Homo sapiens]	FACFER	FAC[+418.1]FER	FAC#FER	595.742	2	C236	67.01	2120493312	0.65196	BTD
NP_031389.3|	NONO	|NONO|4841|Q15233|non-POU domain-containing octamer-binding protein isoform 1 [Homo sapiens]	FACHSASLTVR	FAC[+418.1]HSASLTVR	FAC#HSASLTVR	805.366	2	C145	56.84	1046295808	0.143153	BTD
NP_031389.3|	NONO	|NONO|4841|Q15233|non-POU domain-containing octamer-binding protein isoform 1 [Homo sapiens]	FACHSASLTVR	FAC[+418.1]HSASLTVR	FAC#HSASLTVR	537.247	3	C145	56.84	3414616192	1.26494	BTD
NP_064585.1|	PRTFDC1	|PRTFDC1|56952|Q9NRG1|phosphoribosyltransferase domain-containing protein 1 [Homo sapiens]	FCADLVEHLK	FC[+418.1]ADLVEHLK	FC#ADLVEHLK	531.579	3	C82	69.83	239991488	-0.238764	BTD
NP_002215.2|	ITPR3	|ITPR3|3710|Q14573;A6H8K3;Q59ES2|inositol 1,4,5-trisphosphate receptor type 3 [Homo sapiens]	FCAGNPGNQALLHK	FC[+418.1]AGNPGNQALLHK	FC#AGNPGNQALLHK	629.959	3	C1236	58.29	334247584	-0.194118	BTD
NP_060217.1|	ANKHD1	|ANKHD1|54882|Q8IWZ3|ankyrin repeat and KH domain-containing protein 1 isoform 1 [Homo sapiens]	FCELLIHR	FC[+418.1]ELLIHR	FC#ELLIHR	483.565	3	C1308	70.41	98001472	-0.306019	BTD
NP_001960.2|	EIF5	|EIF5|1983|P55010|eukaryotic translation initiation factor 5 [Homo sapiens]	FCHNNKK	FC[+418.1]HNNKK	FC#HNNKK	436.859	3	C304	35.3	69165010	-0.319678	BTD
NP_001004067.1|	NOMO3	|NOMO3|408050|P69849;Q1LZN2|nodal modulator 3 precursor [Homo sapiens]	FCLSKPGVYK	FC[+418.1]LSKPGVYK	FC#LSKPGVYK	780.373	2	C627	63.49	124214352	-0.293603	BTD
NP_001004067.1|	NOMO3	|NOMO3|408050|P69849;Q1LZN2|nodal modulator 3 precursor [Homo sapiens]	FCLSKPGVYK	FC[+418.1]LSKPGVYK	FC#LSKPGVYK	520.584	3	C627	63.49	566597392	-0.0840626	BTD
NP_004823.1|	GSTO1	|GSTO1|9446|P78417|glutathione S-transferase omega-1 isoform 1 [Homo sapiens]	FCPFAER	FC[+418.1]PFAER	FC#PFAER	644.268	2	C32	72.83	27125384192	12.4958	BTD
NP_004823.1|	GSTO1	|GSTO1|9446|P78417|glutathione S-transferase omega-1 isoform 1 [Homo sapiens]	FCPFAER	FC[+418.1]PFAER	FC#PFAER	429.848	3	C32	72.83	1472386176	0.344976	BTD
NP_001681.2|	ATP6V1A	|ATP6V1A|523|P38606|V-type proton ATPase catalytic subunit A [Homo sapiens]	FCPFYK	FC[+418.1]PFYK	FC#PFYK	611.757	2	C532	71.96	379935984	-0.172477	BTD
NP_055037.1|	NDUFA8	|NDUFA8|4702|P51970;B1AM93|NADH dehydrogenase [ubiquinone] 1 alpha subcomplex subunit 8 [Homo sapiens]	FDECVLDK	FDEC[+418.1]VLDK	FDEC#VLDK	693.789	2	C110	70.1	159670824	-0.276808	BTD
NP_000998.1|	RPS4X	|RPS4X|6191|P62701;B2R491|40S ribosomal protein S4, X isoform X isoform [Homo sapiens]	FDTGNLCMVTGGANLGR	FDTGNLC[+418.1]M[+16]VTGGANLGR	FDTGNLC#MVTGGANLGR	720.648	3	C181	72.32	185212368	-0.26471	BTD
NP_002146.2|	HSPA6	|HSPA6|3310|P17066|heat shock 70 kDa protein 6 [Homo sapiens]	FEELCSDLFR	FEELC[+418.1]SDLFR	FEELC#SDLFR	838.858	2	C308	80.89	33331636	-0.336651	BTD
NP_031381.2|	HSP90AB1	|HSP90AB1|3326|P08238|heat shock protein HSP 90-beta [Homo sapiens]	FENLCK	FENLC[+418.1]K	FENLC#K	586.249	2	C564	63.33	6845820416	2.89017	BTD
NP_055045.2|	SRP68	|SRP68|6730|Q9UHB9|signal recognition particle 68 kDa protein isoform 1 [Homo sapiens]	FETFCLDPSLVTK	FETFC[+418.1]LDPSLVTK	FETFC#LDPSLVTK	959.442	2	C562	84.2	24680565	-0.340748	BTD
NP_005511.1|	HNRNPH1	|HNRNPH1|3187|P31943|heterogeneous nuclear ribonucleoprotein H [Homo sapiens]	FFSDCK	FFSDC[+418.1]K	FFSDC#K	582.728	2	C34	62.34	251332856	-0.233392	BTD
NP_112556.2|	HNRNPAB	|HNRNPAB|3182|Q99729|heterogeneous nuclear ribonucleoprotein A/B isoform a [Homo sapiens]	FGEVVDCTIK	FGEVVDC[+418.1]TIK	FGEVVDC#TIK	764.844	2	C99	69.41	776164992	0.0152017	BTD
NP_112556.2|	HNRNPAB	|HNRNPAB|3182|Q99729|heterogeneous nuclear ribonucleoprotein A/B isoform a [Homo sapiens]	FGEVVDCTIK	FGEVVDC[+418.1]TIK	FGEVVDC#TIK	510.232	3	C99	69.41	122697484	-0.294321	BTD
NP_001003810.1|	HNRNPD	|HNRNPD|3184|Q14103|heterogeneous nuclear ribonucleoprotein D0 isoform d [Homo sapiens]	FGEVVDCTLK	FGEVVDC[+418.1]TLK	FGEVVDC#TLK	764.844	2	C107	69.99	339595696	-0.191585	BTD
NP_005850.1|	PURA	|PURA|5813|Q00577|transcriptional activator protein Pur-alpha [Homo sapiens]	FGHTFCK	FGHTFC[+418.1]K	FGHTFC#K	629.263	2	C272	56.26	188434872	-0.263184	BTD
NP_005850.1|	PURA	|PURA|5813|Q00577|transcriptional activator protein Pur-alpha [Homo sapiens]	FGHTFCK	FGHTFC[+418.1]K	FGHTFC#K	419.844	3	C272	56.26	605128992	-0.0658116	BTD
NP_060898.2|	UTP6	|UTP6|55813|Q9NYH9|U3 small nucleolar RNA-associated protein 6 homolog [Homo sapiens]	FHPECPK	FHPEC[+418.1]PK	FHPEC#PK	638.268	2	C175	51.84	415174992	-0.155786	BTD
NP_060898.2|	UTP6	|UTP6|55813|Q9NYH9|U3 small nucleolar RNA-associated protein 6 homolog [Homo sapiens]	FHPECPK	FHPEC[+418.1]PK	FHPEC#PK	425.848	3	C175	51.84	740750528	-0.00157276	BTD
NP_112556.2|	HNRNPAB	|HNRNPAB|3182|Q99729|heterogeneous nuclear ribonucleoprotein A/B isoform a [Homo sapiens]	FHTVSGSKCEIK	FHTVSGSKC[+418.1]EIK	FHTVSGSKC#EIK	585.273	3	C224	48.46	710335200	-0.0159794	BTD
NP_112556.2|	HNRNPAB	|HNRNPAB|3182|Q99729|heterogeneous nuclear ribonucleoprotein A/B isoform a [Homo sapiens]	FHTVSGSKCEIK	FHTVSGSKC[+418.1]EIK	FHTVSGSKC#EIK	439.206	4	C224	48.46	413510640	-0.156574	BTD
NP_055106.1|	GCAT	|GCAT|23464|O75600;A8K228|2-amino-3-ketobutyrate coenzyme A ligase, mitochondrial isoform 2 precursor [Homo sapiens]	FICGTQSIHK	FIC[+418.1]GTQSIHK	FIC#GTQSIHK	517.908	3	C106	57.01	285217776	-0.217342	BTD
NP_942127.1|	ACLY	|ACLY|47|P53396|ATP-citrate synthase isoform 2 [Homo sapiens]	FICTTSAIQNR	FIC[+418.1]TTSAIQNR	FIC#TTSAIQNR	836.385	2	C20	65.24	432852352	-0.147413	BTD
NP_055871.1|	RRP1B	|RRP1B|23076|Q14684|ribosomal RNA processing protein 1 homolog B [Homo sapiens]	FIDPFCK	FIDPFC[+418.1]K	FIDPFC#K	644.28	2	C197	79.15	108905604	-0.300854	BTD
NP_003674.1|	RRP1	|RRP1|8568|P56182|ribosomal RNA processing protein 1 homolog A [Homo sapiens]	FIDPFCR	FIDPFC[+418.1]R	FIDPFC#R	658.284	2	C198	80.25	33593131	-0.336527	BTD
NP_005304.3|	PDIA3	|PDIA3|2923|P30101|protein disulfide-isomerase A3 precursor [Homo sapiens]	FIQENIFGICPHMTEDNKDLIQGK	FIQENIFGIC[+418.1]PHM[+16]TEDNKDLIQGK	FIQENIFGIC#PHMTEDNKDLIQGK	806.877	4	C244	73.39	324797936	-0.198594	BTD
NP_006275.1|	TAF10	|TAF10|6881|Q12962|transcription initiation factor TFIID subunit 10 [Homo sapiens]	FISDIANDALQHCK	FISDIANDALQHC[+418.1]K	FISDIANDALQHC#K	664.97	3	C174	73.2	153026912	-0.279955	BTD
NP_008835.5|	PRKDC	|PRKDC|5591|P78527|DNA-dependent protein kinase catalytic subunit isoform 1 [Homo sapiens]	FIVCLNK	FIVC[+418.1]LNK	FIVC#LNK	627.804	2	C2363	72.77	402742592	-0.161674	BTD
NP_001279.2|	CLIC1	|CLIC1|1192|O00299;Q5SRT3|chloride intracellular channel protein 1 [Homo sapiens]	FLDGNELTLADCNLLPK	FLDGNELTLADC[+418.1]NLLPK	FLDGNELTLADC#NLLPK	765.366	3	C178	85.67	68021528	-0.320219	BTD
NP_057212.1|	COPG1	|COPG1|22820|Q9Y678|coatomer subunit gamma-1 [Homo sapiens]	FLGMHPCER	FLGM[+16]HPC[+418.1]ER	FLGMHPC#ER	508.546	3	C813	54.04	235279944	-0.240995	BTD
NP_001219.2|	CASP8	|CASP8|841|Q14790|caspase-8 isoform A precursor [Homo sapiens]	FLLQEEISKCK	FLLQEEISKC[+418.1]K	FLLQEEISKC#K	585.953	3	C163	69.87	111734480	-0.299514	BTD
NP_001093422.2|	ITPR1	|ITPR1|3708|Q14643;B4DER3;Q59H91|inositol 1,4,5-trisphosphate receptor type 1 isoform 1 [Homo sapiens]	FLQLLCENHNR	FLQLLC[+418.1]ENHNR	FLQLLC#ENHNR	602.28	3	C1937	70.87	63055706	-0.322571	BTD
NP_056121.2|	USP24	|USP24|23358|Q9UPU5|ubiquitin carboxyl-terminal hydrolase 24 [Homo sapiens]	FLVTLAQKCPAAK	FLVTLAQKC[+418.1]PAAK	FLVTLAQKC#PAAK	603.313	3	C2510	65.43	182318328	-0.266081	BTD
NP_002296.1|	LGALS1	|LGALS1|3956|P09382|galectin-1 [Homo sapiens]	FNAHGDANTIVCNSK	FNAHGDANTIVC[+418.1]NSK	FNAHGDANTIVC#NSK	1004.94	2	C61	53.91	659314208	-0.0401461	BTD
NP_002296.1|	LGALS1	|LGALS1|3956|P09382|galectin-1 [Homo sapiens]	FNAHGDANTIVCNSK	FNAHGDANTIVC[+418.1]NSK	FNAHGDANTIVC#NSK	670.293	3	C61	53.91	2966041856	1.05246	BTD
NP_005959.2|	HNRNPM	|HNRNPM|4670|P52272|heterogeneous nuclear ribonucleoprotein M isoform a [Homo sapiens]	FNECGHVLYADIK	FNEC[+418.1]GHVLYADIK	FNEC#GHVLYADIK	642.955	3	C676	65.41	288555408	-0.215761	BTD
NP_008835.5|	PRKDC	|PRKDC|5591|P78527|DNA-dependent protein kinase catalytic subunit isoform 1 [Homo sapiens]	FNNYVDCMK	FNNYVDC[+418.1]M[+16]K	FNNYVDC#MK	784.304	2	C1742	57.31	335142832	-0.193694	BTD
NP_008835.5|	PRKDC	|PRKDC|5591|P78527|DNA-dependent protein kinase catalytic subunit isoform 1 [Homo sapiens]	FNNYVDCMKK	FNNYVDC[+418.1]M[+16]KK	FNNYVDC#MKK	848.352	2	C1742	51.28	185758552	-0.264452	BTD
NP_008835.5|	PRKDC	|PRKDC|5591|P78527|DNA-dependent protein kinase catalytic subunit isoform 1 [Homo sapiens]	FNNYVDCMKK	FNNYVDC[+418.1]M[+16]KK	FNNYVDC#MKK	565.904	3	C1742	51.28	1137186208	0.186204	BTD
NP_006294.2|	AIMP2	|AIMP2|7965|Q13155|aminoacyl tRNA synthase complex-interacting multifunctional protein 2 [Homo sapiens]	FSIQTMCPIEGEGNIAR	FSIQTM[+16]C[+418.1]PIEGEGNIAR	FSIQTMC#PIEGEGNIAR	767.343	3	C205	71.26	184778136	-0.264916	BTD
NP_006089.1|	GNB2L1	|GNB2L1|10399|P63244;E9KL35|guanine nucleotide-binding protein subunit beta-2-like 1 [Homo sapiens]	FSPNSSNPIIVSCGWDK	FSPNSSNPIIVSC[+418.1]GWDK	FSPNSSNPIIVSC#GWDK	757.007	3	C168	79.55	103486648	-0.303421	BTD
NP_009035.3|	RPL10A	|RPL10A|4736|P62906|60S ribosomal protein L10a [Homo sapiens]	FSVCVLGDQQHCDEAK	FSVC[+418.1]VLGDQQHC[+57]DEAK	FSVC#VLGDQQHCDEAK	751.984	3	C66	69.59	309243280	-0.205962	BTD
NP_055681.1|	SEC16A	|SEC16A|9919|O15027|protein transport protein Sec16A [Homo sapiens]	FSVPHVCAR	FSVPHVC[+418.1]AR	FSVPHVC#AR	717.326	2	C1451	63.21	169130000	-0.272328	BTD
NP_055681.1|	SEC16A	|SEC16A|9919|O15027|protein transport protein Sec16A [Homo sapiens]	FSVPHVCAR	FSVPHVC[+418.1]AR	FSVPHVC#AR	478.553	3	C1451	63.21	617515104	-0.0599448	BTD
NP_001009186.1|	CCT6A	|CCT6A|908|A6NCD2|T-complex protein 1 subunit zeta isoform b [Homo sapiens]	FTFIEKCNNPR	FTFIEKC[+418.1]NNPR	FTFIEKC#NNPR	893.906	2	C321	61.63	182236408	-0.26612	BTD
NP_001009186.1|	CCT6A	|CCT6A|908|A6NCD2|T-complex protein 1 subunit zeta isoform b [Homo sapiens]	FTFIEKCNNPR	FTFIEKC[+418.1]NNPR	FTFIEKC#NNPR	596.273	3	C321	61.63	549403488	-0.0922067	BTD
NP_003355.1|	UPP1	|UPP1|7378|Q16831|uridine phosphorylase 1 [Homo sapiens]	FVCVGGSPSR	FVC[+418.1]VGGSPSR	FVC#VGGSPSR	713.816	2	C57	62.23	145682272	-0.283434	BTD
NP_055486.2|	UBE3C	|UBE3C|9690|Q15386|ubiquitin-protein ligase E3C [Homo sapiens]	FVTSCSRPPLLGFK	FVTSC[+418.1]SRPPLLGFK	FVTSC#SRPPLLGFK	657.327	3	C1018	72.24	46055160	-0.330624	BTD
NP_002125.3|	HMOX2	|HMOX2|3163|P30519|heme oxygenase 2 [Homo sapiens]	GALEGSSCPFR	GALEGSSC[+418.1]PFR	GALEGSSC#PFR	771.329	2	C282	65.91	3663626752	1.38288	BTD
NP_002125.3|	HMOX2	|HMOX2|3163|P30519|heme oxygenase 2 [Homo sapiens]	GALEGSSCPFR	GALEGSSC[+418.1]PFR	GALEGSSC#PFR	514.555	3	C282	65.91	412750960	-0.156934	BTD
NP_733765.1|	ATP2A2	|ATP2A2|488|P16615|sarcoplasmic/endoplasmic reticulum calcium ATPase 2 isoform b [Homo sapiens]	GAPEGVIDRCTHIR	GAPEGVIDRC[+418.1]THIR	GAPEGVIDRC#THIR	647.973	3	C524	55.24	478302544	-0.125885	BTD
NP_733765.1|	ATP2A2	|ATP2A2|488|P16615|sarcoplasmic/endoplasmic reticulum calcium ATPase 2 isoform b [Homo sapiens]	GAPEGVIDRCTHIR	GAPEGVIDRC[+418.1]THIR	GAPEGVIDRC#THIR	486.232	4	C524	55.24	268697808	-0.225166	BTD
NP_004125.3|	HSPA9	|HSPA9|3313|P38646|stress-70 protein, mitochondrial precursor [Homo sapiens]	GAVVGIDLGTTNSCVAVMEGK	GAVVGIDLGTTNSC[+418.1]VAVM[+16]EGK	GAVVGIDLGTTNSC#VAVMEGK	819.048	3	C66	73.38	103549152	-0.303391	BTD
NP_001155238.1|	AHCY	|AHCY|191|P23526;B3KUN3;F5H737|adenosylhomocysteinase isoform 2 [Homo sapiens]	GCAQALR	GC[+418.1]AQALR	GC#AQALR	568.752	2	C200	53.86	202187976	-0.25667	BTD
NP_005959.2|	HNRNPM	|HNRNPM|4670|P52272|heterogeneous nuclear ribonucleoprotein M isoform a [Homo sapiens]	GCAVVEFK	GC[+418.1]AVVEFK	GC#AVVEFK	635.783	2	C114	67.21	710949248	-0.0156885	BTD
NP_001247435.1|	RPS3	|RPS3|6188|-|40S ribosomal protein S3 isoform 2 [Homo sapiens]	GCEVVVSGK	GC[+418.1]EVVVSGK	GC#EVVVSGK	648.292	2	C150	57.39	725894496	-0.00860951	BTD
NP_000970.1|	RPL18	|RPL18|6141|Q07020|60S ribosomal protein L18 isoform 1 [Homo sapiens]	GCGTVLLSGPR	GC[+418.1]GTVLLSGPR	GC#GTVLLSGPR	739.35	2	C134	68.15	913348864	0.0801806	BTD
NP_000970.1|	RPL18	|RPL18|6141|Q07020|60S ribosomal protein L18 isoform 1 [Homo sapiens]	GCGTVLLSGPR	GC[+418.1]GTVLLSGPR	GC#GTVLLSGPR	493.236	3	C134	68.15	76483636	-0.316211	BTD
NP_001180345.1|	DDX3X	|DDX3X|1654|-|ATP-dependent RNA helicase DDX3X isoform 2 [Homo sapiens]	GCHLLVATPGR	GC[+418.1]HLLVATPGR	GC#HLLVATPGR	771.371	2	C317	62.53	933868736	0.0899001	BTD
NP_001180345.1|	DDX3X	|DDX3X|1654|-|ATP-dependent RNA helicase DDX3X isoform 2 [Homo sapiens]	GCHLLVATPGR	GC[+418.1]HLLVATPGR	GC#HLLVATPGR	514.583	3	C317	62.53	1881015808	0.538528	BTD
NP_001093131.1|	EIF3CL	|EIF3CL|728689|B5ME19|eukaryotic translation initiation factor 3 subunit C [Homo sapiens]	GCILTLVER	GC[+418.1]ILTLVER	GC#ILTLVER	711.349	2	C444	85.53	280021016	-0.219803	BTD
NP_003553.2|	SLC25A11	|SLC25A11|8402|Q02978;Q6IBH0|mitochondrial 2-oxoglutarate/malate carrier protein isoform 1 [Homo sapiens]	GCIPTMAR	GC[+418.1]IPTM[+16]AR	GC#IPTMAR	641.772	2	C184	58.08	287488512	-0.216266	BTD
NP_689508.3|	TARS	|TARS|6897|P26639|threonine--tRNA ligase, cytoplasmic isoform 1 [Homo sapiens]	GCLDFLR	GC[+418.1]LDFLR	GC#LDFLR	621.276	2	C479	81.75	19411024	-0.343244	BTD
NP_002797.3|	PSMC6	|PSMC6|5706|P62333|26S protease regulatory subunit 10B [Homo sapiens]	GCLLYGPPGTGK	GC[+418.1]LLYGPPGTGK	GC#LLYGPPGTGK	790.865	2	C184	71.81	220416584	-0.248035	BTD
NP_005029.1|	PPID	|PPID|5481|Q08752;E5KN55|peptidyl-prolyl cis-trans isomerase D [Homo sapiens]	GCPFHR	GC[+418.1]PFHR	GC#PFHR	567.734	2	C71	53.24	143866568	-0.284294	BTD
NP_005029.1|	PPID	|PPID|5481|Q08752;E5KN55|peptidyl-prolyl cis-trans isomerase D [Homo sapiens]	GCPFHR	GC[+418.1]PFHR	GC#PFHR	378.825	3	C71	53.24	64825036	-0.321733	BTD
NP_002943.2|	RPS2	|RPS2|6187|P15880|40S ribosomal protein S2 [Homo sapiens]	GCTATLGNFAK	GC[+418.1]TATLGNFAK	GC#TATLGNFAK	750.834	2	C229	65.54	609151904	-0.0639061	BTD
NP_000958.1|	RPL3	|RPL3|6122|P39023|60S ribosomal protein L3 isoform a [Homo sapiens]	GCVVGTK	GC[+418.1]VVGTK	GC#VVGTK	541.244	2	C336	56.75	863356416	0.056501	BTD
NP_002145.3|	HSPA4	|HSPA4|3308|P34932|heat shock 70 kDa protein 4 [Homo sapiens]	GCALQCAILSPAFK	GC[+57]ALQC[+418.1]AILSPAFK	GCALQC#AILSPAFK	948.944	2	C380	79.78	40968648	-0.333033	BTD
NP_056255.2|	MTHFD1L	|MTHFD1L|25902|Q6UB35|monofunctional C1-tetrahydrofolate synthase, mitochondrial isoform 2 precursor [Homo sapiens]	GDAHECFVSPVAK	GDAHEC[+418.1]FVSPVAK	GDAHEC#FVSPVAK	593.261	3	C198	63.06	1368023104	0.295543	BTD
NP_001018146.1|	NME1-NME2	|NME1-NME2|654364|P22392|NME1-NME2 protein [Homo sapiens]	GDFCIQVGR	GDFC[+418.1]IQVGR	GDFC#IQVGR	706.808	2	C109	70.8	537636848	-0.0977801	BTD
NP_004387.1|	DDX5	|DDX5|1655|P17844|probable ATP-dependent RNA helicase DDX5 [Homo sapiens]	GDGPICLVLAPTR	GDGPIC[+418.1]LVLAPTR	GDGPIC#LVLAPTR	865.424	2	C170	83.31	28495514	-0.338941	BTD
NP_006810.1|	STIP1	|STIP1|10963|P31948|stress-induced-phosphoprotein 1 [Homo sapiens]	GDYNKCR	GDYNKC[+418.1]R	GDYNKC#R	637.258	2	C278	41.65	371728816	-0.176365	BTD
NP_006810.1|	STIP1	|STIP1|10963|P31948|stress-induced-phosphoprotein 1 [Homo sapiens]	GDYNKCR	GDYNKC[+418.1]R	GDYNKC#R	425.174	3	C278	41.65	402100976	-0.161978	BTD
NP_003312.3|	TUFM	|TUFM|7284|P49411|elongation factor Tu, mitochondrial precursor [Homo sapiens]	GEETPVIVGSALCALEGR	GEETPVIVGSALC[+418.1]ALEGR	GEETPVIVGSALC#ALEGR	1110.03	2	C225	85.6	104960720	-0.302723	BTD
NP_003312.3|	TUFM	|TUFM|7284|P49411|elongation factor Tu, mitochondrial precursor [Homo sapiens]	GEETPVIVGSALCALEGR	GEETPVIVGSALC[+418.1]ALEGR	GEETPVIVGSALC#ALEGR	740.354	3	C225	85.6	341477664	-0.190693	BTD
NP_003312.3|	TUFM	|TUFM|7284|P49411|elongation factor Tu, mitochondrial precursor [Homo sapiens]	GEETPVIVGSALCALEGRDPELGLK	GEETPVIVGSALC[+418.1]ALEGRDPELGLK	GEETPVIVGSALC#ALEGRDPELGLK	991.156	3	C225	85.35	173236304	-0.270383	BTD
NP_003312.3|	TUFM	|TUFM|7284|P49411|elongation factor Tu, mitochondrial precursor [Homo sapiens]	GEETPVIVGSALCALEGRDPELGLK	GEETPVIVGSALC[+418.1]ALEGRDPELGLK	GEETPVIVGSALC#ALEGRDPELGLK	743.619	4	C225	85.35	86811484	-0.311319	BTD
NP_003079.1|	FSCN1	|FSCN1|6624|Q16658;B3KTA3|fascin [Homo sapiens]	GEHGFIGCR	GEHGFIGC[+418.1]R	GEHGFIGC#R	697.292	2	C397	57.89	192512104	-0.261253	BTD
NP_006827.1|	GCN1L1	|GCN1L1|10985|Q92616|translational activator GCN1 [Homo sapiens]	GEHVPGFCLPK	GEHVPGFC[+418.1]LPK	GEHVPGFC#LPK	534.579	3	C2255	65.95	1139194880	0.187155	BTD
NP_476516.1|	NAA15	|NAA15|80155|Q9BXJ9;Q58F05|N-alpha-acetyltransferase 15, NatA auxiliary subunit [Homo sapiens]	GELLLQLCR	GELLLQLC[+418.1]R	GELLLQLC#R	731.863	2	C238	82.64	239591816	-0.238953	BTD
NP_001688.1|	ATP5O	|ATP5O|539|P48047|ATP synthase subunit O, mitochondrial precursor [Homo sapiens]	GEVPCTVTSASPLEEATLSELK	GEVPC[+418.1]TVTSASPLEEATLSELK	GEVPC#TVTSASPLEEATLSELK	893.756	3	C141	81.97	51761868	-0.327921	BTD
NP_001003810.1|	HNRNPD	|HNRNPD|3184|Q14103|heterogeneous nuclear ribonucleoprotein D0 isoform d [Homo sapiens]	GFCFITFK	GFC[+418.1]FITFK	GFC#FITFK	690.809	2	C207	87.72	30314596	-0.33808	BTD
NP_001003810.1|	HNRNPD	|HNRNPD|3184|Q14103|heterogeneous nuclear ribonucleoprotein D0 isoform d [Homo sapiens]	GFCFITFKEEEPVK	GFC[+418.1]FITFKEEEPVK	GFC#FITFKEEEPVK	697.99	3	C207	80.32	91374104	-0.309158	BTD
NP_001003810.1|	HNRNPD	|HNRNPD|3184|Q14103|heterogeneous nuclear ribonucleoprotein D0 isoform d [Homo sapiens]	GFCFITFKEEEPVKK	GFC[+418.1]FITFKEEEPVKK	GFC#FITFKEEEPVKK	555.768	4	C207	74.42	143079976	-0.284667	BTD
NP_001193929.1|	HNRPDL	|HNRPDL|9987|O14979|heterogeneous nuclear ribonucleoprotein D-like isoform b [Homo sapiens]	GFCFITYTDEEPVKK	GFC[+418.1]FITYTDEEPVKK	GFC#FITYTDEEPVKK	732.332	3	C277	77.76	189783536	-0.262545	BTD
NP_006363.4|	SYNCRIP	|SYNCRIP|10492|O60506|heterogeneous nuclear ribonucleoprotein Q isoform 1 [Homo sapiens]	GFCFLEYEDHK	GFC[+418.1]FLEYEDHK	GFC#FLEYEDHK	602.581	3	C289	77.75	63423468	-0.322397	BTD
NP_006699.2|	GLO1	|GLO1|2739|Q04760|lactoylglutathione lyase [Homo sapiens]	GFGHIGIAVPDVYSACK	GFGHIGIAVPDVYSAC[+418.1]K	GFGHIGIAVPDVYSAC#K	718.005	3	C139	75.08	125909288	-0.2928	BTD
NP_055101.2|	NCS1	|NCS1|23413|P62166|neuronal calcium sensor 1 isoform 1 [Homo sapiens]	GFIKDCPSGQLDAAGFQK	GFIKDC[+418.1]PSGQLDAAGFQK	GFIKDC#PSGQLDAAGFQK	767.354	3	C38	66.98	421964256	-0.15257	BTD
NP_004068.2|	CS	|CS|1431|O75390|citrate synthase, mitochondrial precursor [Homo sapiens]	GFSIPECQK	GFSIPEC[+418.1]QK	GFSIPEC#QK	713.81	2	C101	67.81	121138004	-0.29506	BTD
NP_003267.1|	TMPO	|TMPO|7112|P42166|thymopoietin isoform alpha [Homo sapiens]	GGTLFGGEVCK	GGTLFGGEVC[+418.1]K	GGTLFGGEVC#K	743.329	2	C684	69.55	252315968	-0.232926	BTD
NP_009109.3|	STRAP	|STRAP|11171|Q9Y3F4|serine-threonine kinase receptor-associated protein [Homo sapiens]	GHFGPIHCVR	GHFGPIHC[+418.1]VR	GHFGPIHC#VR	514.236	3	C270	55.28	148103216	-0.282288	BTD
NP_937790.2|	ABHD15	|ABHD15|116236|Q6UXT9|abhydrolase domain-containing protein 15 precursor [Homo sapiens]	GHHGCPLVSPR	GHHGC[+418.1]PLVSPR	GHHGC#PLVSPR	526.575	3	C199	50.46	227037040	-0.2449	BTD
NP_004332.2|	CAD	|CAD|790|P27708|CAD protein [Homo sapiens]	GHNQPCLLVGSGR	GHNQPC[+418.1]LLVGSGR	GHNQPC#LLVGSGR	585.94	3	C280	62.99	351484352	-0.185954	BTD
NP_001001.2|	RPS6	|RPS6|6194|P62753;A2A3R6|40S ribosomal protein S6 [Homo sapiens]	GHSCYRPR	GHSC[+418.1]YRPR	GHSC#YRPR	465.201	3	C83	40.58	943272288	0.0943542	BTD
NP_002645.3|	PKM	|PKM|5315|P14618|pyruvate kinase isozymes M1/M2 isoform a [Homo sapiens]	GIFPVLCK	GIFPVLC[+418.1]K	GIFPVLC#K	647.82	2	C474	82.5	1443056448	0.331083	BTD
NP_002645.3|	PKM	|PKM|5315|P14618|pyruvate kinase isozymes M1/M2 isoform a [Homo sapiens]	GIFPVLCK	GIFPVLC[+418.1]K	GIFPVLC#K	432.216	3	C474	82.5	78155720	-0.315419	BTD
NP_005038.1|	PSMD5	|PSMD5|5711|Q16401|26S proteasome non-ATPase regulatory subunit 5 isoform 1 [Homo sapiens]	GISSQPFPELHCAALK	GISSQPFPELHC[+418.1]AALK	GISSQPFPELHC#AALK	706.005	3	C412	70.98	169244120	-0.272274	BTD
NP_002782.1|	PSMA6	|PSMA6|5687|P60900|proteasome subunit alpha type-6 [Homo sapiens]	GKDCAVIVTQK	GKDC[+418.1]AVIVTQK	GKDC#AVIVTQK	527.258	3	C47	54.42	296885952	-0.211815	BTD
NP_002786.2|	PSMB3	|PSMB3|5691|P49720|proteasome subunit beta type-3 [Homo sapiens]	GKNCVAIAADR	GKNC[+418.1]VAIAADR	GKNC#VAIAADR	512.575	3	C19	53.94	227141592	-0.24485	BTD
NP_000961.2|	RPL6	|RPL6|6128|Q02878|60S ribosomal protein L6 [Homo sapiens]	GKPHCSR	GKPHC[+418.1]SR	GKPHC#SR	401.511	3	C44	30.13	980423296	0.111951	BTD
NP_001073027.1|	HNRNPUL2	|HNRNPUL2|221092|Q1KMD3|heterogeneous nuclear ribonucleoprotein U-like protein 2 [Homo sapiens]	GKVCFEAK	GKVC[+418.1]FEAK	GKVC#FEAK	650.297	2	C293	53.68	277418832	-0.221036	BTD
NP_004492.2|	HNRNPU	|HNRNPU|3192|Q00839|heterogeneous nuclear ribonucleoprotein U isoform b [Homo sapiens]	GKVCFEMK	GKVC[+418.1]FEM[+16]K	GKVC#FEMK	688.296	2	C316	52.78	1039390880	0.139882	BTD
NP_004492.2|	HNRNPU	|HNRNPU|3192|Q00839|heterogeneous nuclear ribonucleoprotein U isoform b [Homo sapiens]	GKVCFEMK	GKVC[+418.1]FEM[+16]K	GKVC#FEMK	459.2	3	C316	52.78	1932782208	0.563048	BTD
NP_001247435.1|	RPS3	|RPS3|6188|-|40S ribosomal protein S3 isoform 2 [Homo sapiens]	GLCAIAQAESLR	GLC[+418.1]AIAQAESLR	GLC#AIAQAESLR	825.392	2	C113	74.74	3130975232	1.13059	BTD
NP_001247435.1|	RPS3	|RPS3|6188|-|40S ribosomal protein S3 isoform 2 [Homo sapiens]	GLCAIAQAESLR	GLC[+418.1]AIAQAESLR	GLC#AIAQAESLR	550.597	3	C113	74.74	605063200	-0.0658428	BTD
NP_036602.1|	TNPO3	|TNPO3|23534|Q9Y5L0;B3KMX1|transportin-3 isoform 1 [Homo sapiens]	GLCEKPLASAAAK	GLC[+418.1]EKPLASAAAK	GLC#EKPLASAAAK	838.91	2	C511	55.76	87308118	-0.311084	BTD
NP_005165.1|	ATP5C1	|ATP5C1|509|P36542;Q8TAS0|ATP synthase subunit gamma, mitochondrial isoform H (heart) precursor [Homo sapiens]	GLCGAIHSSIAK	GLC[+418.1]GAIHSSIAK	GLC#GAIHSSIAK	787.876	2	C103	61.76	298309824	-0.21114	BTD
NP_005165.1|	ATP5C1	|ATP5C1|509|P36542;Q8TAS0|ATP synthase subunit gamma, mitochondrial isoform H (heart) precursor [Homo sapiens]	GLCGAIHSSIAK	GLC[+418.1]GAIHSSIAK	GLC#GAIHSSIAK	525.587	3	C103	61.76	313530240	-0.203931	BTD
NP_055140.1|	CORO1C	|CORO1C|23603|Q9ULV4|coronin-1C isoform 1 [Homo sapiens]	GLDVNKCEIAR	GLDVNKC[+418.1]EIAR	GLDVNKC#EIAR	818.385	2	C330	56.98	173153408	-0.270422	BTD
NP_055140.1|	CORO1C	|CORO1C|23603|Q9ULV4|coronin-1C isoform 1 [Homo sapiens]	GLDVNKCEIAR	GLDVNKC[+418.1]EIAR	GLDVNKC#EIAR	545.925	3	C330	56.98	769759872	0.0121679	BTD
NP_005403.2|	SHMT2	|SHMT2|6472|P34897;Q5BJF5|serine hydroxymethyltransferase, mitochondrial isoform 1 precursor [Homo sapiens]	GLELIASENFCSR	GLELIASENFC[+418.1]SR	GLELIASENFC#SR	619.615	3	C80	78.46	40893680	-0.333069	BTD
NP_001143.2|	SLC25A5	|SLC25A5|292|P05141;Q6NVC0|ADP/ATP translocase 2 [Homo sapiens]	GLGDCLVK	GLGDC[+418.1]LVK	GLGDC#LVK	611.783	2	C160	70.3	2200535616	0.689873	BTD
NP_733779.1|	SKP1	|SKP1|6500|P63208|S-phase kinase-associated protein 1 isoform b [Homo sapiens]	GLLDVTCK	GLLDVTC[+418.1]K	GLLDVTC#K	633.796	2	C120	72.06	187435432	-0.263657	BTD
NP_001004067.1|	NOMO3	|NOMO3|408050|P69849;Q1LZN2|nodal modulator 3 precursor [Homo sapiens]	GLLPGCVYHVQLK	GLLPGC[+418.1]VYHVQLK	GLLPGC#VYHVQLK	615.644	3	C1012	74.02	91863068	-0.308926	BTD
NP_004957.1|	HNRNPF	|HNRNPF|3185|P52597|heterogeneous nuclear ribonucleoprotein F [Homo sapiens]	GLPFGCTK	GLPFGC[+418.1]TK	GLPFGC#TK	620.778	2	C122	68.77	452097712	-0.138297	BTD
NP_005511.1|	HNRNPH1	|HNRNPH1|3187|P31943|heterogeneous nuclear ribonucleoprotein H [Homo sapiens]	GLPWSCSADEVQR	GLPWSC[+418.1]SADEVQR	GLPWSC#SADEVQR	622.603	3	C22	70.65	34222928	-0.336228	BTD
NP_002881.1|	RASA1	|RASA1|5921|P20936;Q59GK3|ras GTPase-activating protein 1 isoform 1 [Homo sapiens]	GLQAFCNLR	GLQAFC[+418.1]NLR	GLQAFC#NLR	720.332	2	C576	74	396910816	-0.164437	BTD
NP_057231.1|	PPME1	|PPME1|51400|Q9Y570|protein phosphatase methylesterase 1 [Homo sapiens]	GLSNLFLSCPIPK	GLSNLFLSC[+418.1]PIPK	GLSNLFLSC#PIPK	903.95	2	C312	85.73	176597872	-0.268791	BTD
NP_057231.1|	PPME1	|PPME1|51400|Q9Y570|protein phosphatase methylesterase 1 [Homo sapiens]	GLSNLFLSCPIPK	GLSNLFLSC[+418.1]PIPK	GLSNLFLSC#PIPK	602.969	3	C312	85.73	116845452	-0.297093	BTD
NP_008835.5|	PRKDC	|PRKDC|5591|P78527|DNA-dependent protein kinase catalytic subunit isoform 1 [Homo sapiens]	GLSSLLCNFTK	GLSSLLC[+418.1]NFTK	GLSSLLC#NFTK	800.879	2	C232	83.1	182507832	-0.265991	BTD
NP_008835.5|	PRKDC	|PRKDC|5591|P78527|DNA-dependent protein kinase catalytic subunit isoform 1 [Homo sapiens]	GLSSLLCNFTK	GLSSLLC[+418.1]NFTK	GLSSLLC#NFTK	534.255	3	C232	83.1	74427868	-0.317185	BTD
NP_004810.2|	SYMPK	|SYMPK|8189|Q92797|symplekin [Homo sapiens]	GMGMNSPELLLLVENCPK	GM[+16]GM[+16]NSPELLLLVENC[+418.1]PK	GMGMNSPELLLLVENC#PK	799.032	3	C848	86.72	112661264	-0.299075	BTD
NP_005763.3|	RCL1	|RCL1|10171|Q9Y2P8|RNA 3'-terminal phosphate cyclase-like protein [Homo sapiens]	GMPPGGGGEVVFSCPVR	GM[+16]PPGGGGEVVFSC[+418.1]PVR	GMPPGGGGEVVFSC#PVR	693.974	3	C171	70.67	189123768	-0.262858	BTD
NP_001231903.1|	PPP1CC	|PPP1CC|5501|P36873|serine/threonine-protein phosphatase PP1-gamma catalytic subunit isoform 2 [Homo sapiens]	GNHECASINR	GNHEC[+418.1]ASINR	GNHEC#ASINR	759.814	2	C127	45.72	193400352	-0.260832	BTD
NP_002403.2|	MGMT	|MGMT|4255|B4DEE8|methylated-DNA--protein-cysteine methyltransferase [Homo sapiens]	GNPVPILIPCHR	GNPVPILIPC[+418.1]HR	GNPVPILIPC#HR	867.434	2	C176	72.45	2749164800	0.949738	BTD
NP_002403.2|	MGMT	|MGMT|4255|B4DEE8|methylated-DNA--protein-cysteine methyltransferase [Homo sapiens]	GNPVPILIPCHR	GNPVPILIPC[+418.1]HR	GNPVPILIPC#HR	578.625	3	C176	72.45	14031480832	6.29375	BTD
NP_003482.1|	NAA10	|NAA10|8260|P41227|N-alpha-acetyltransferase 10 isoform 1 [Homo sapiens]	GNSPPSSGEACR	GNSPPSSGEAC[+418.1]R	GNSPPSSGEAC#R	790.317	2	C194	47.06	329075184	-0.196568	BTD
NP_008855.1|	SRSF1	|SRSF1|6426|Q07955|serine/arginine-rich splicing factor 1 isoform 1 [Homo sapiens]	GPAGNNDCR	GPAGNNDC[+418.1]R	GPAGNNDC#R	661.256	2	C16	45.6	385327712	-0.169923	BTD
NP_002726.1|	PRKAR1B	|PRKAR1B|5575|P31321|cAMP-dependent protein kinase type I-beta regulatory subunit [Homo sapiens]	GPLKCVK	GPLKC[+418.1]VK	GPLKC#VK	581.791	2	C347	51.64	190649128	-0.262135	BTD
NP_002781.2|	PSMA5	|PSMA5|5686|P28066|proteasome subunit alpha type-5 isoform 1 [Homo sapiens]	GPQLFHMDPSGTFVQCDAR	GPQLFHM[+16]DPSGTFVQC[+418.1]DAR	GPQLFHMDPSGTFVQC#DAR	847.365	3	C165	66.94	338228736	-0.192232	BTD
NP_001611.1|	AHNAK	|AHNAK|79026|Q09666|neuroblast differentiation-associated protein AHNAK isoform 1 [Homo sapiens]	GPSLQGDLAVSGDIKCPK	GPSLQGDLAVSGDIKC[+418.1]PK	GPSLQGDLAVSGDIKC#PK	735.022	3	C5382	65.8	551069712	-0.0914174	BTD
NP_001030611.1|	FAM129B	|FAM129B|64855|Q96TA1|niban-like protein 1 isoform 2 [Homo sapiens]	GPTKEELCK	GPTKEELC[+418.1]K	GPTKEELC#K	474.885	3	C453	49.64	914357376	0.0806583	BTD
NP_002147.2|	HSPD1	|HSPD1|3329|P10809|60 kDa heat shock protein, mitochondrial [Homo sapiens]	GQKCEFQDAYVLLSEK	GQKC[+418.1]EFQDAYVLLSEK	GQKC#EFQDAYVLLSEK	1138.52	2	C237	76.13	257245552	-0.230591	BTD
NP_002147.2|	HSPD1	|HSPD1|3329|P10809|60 kDa heat shock protein, mitochondrial [Homo sapiens]	GQKCEFQDAYVLLSEK	GQKC[+418.1]EFQDAYVLLSEK	GQKC#EFQDAYVLLSEK	759.35	3	C237	76.13	3480045824	1.29593	BTD
NP_055950.1|	NUP205	|NUP205|23165|Q92621|nuclear pore complex protein Nup205 [Homo sapiens]	GQTVCNVK	GQTVC[+418.1]NVK	GQTVC#NVK	633.784	2	C1227	52.52	77035120	-0.31595	BTD
NP_001243284.1|	UBE2L3	|UBE2L3|7332|P68036;B4DSZ4;E7EWS7|ubiquitin-conjugating enzyme E2 L3 isoform 4 [Homo sapiens]	GQVCLPVISAENWKPATK	GQVC[+418.1]LPVISAENWKPATK	GQVC#LPVISAENWKPATK	787.057	3	C144	74.63	4140721664	1.60887	BTD
NP_001243284.1|	UBE2L3	|UBE2L3|7332|P68036;B4DSZ4;E7EWS7|ubiquitin-conjugating enzyme E2 L3 isoform 4 [Homo sapiens]	GQVCLPVISAENWKPATK	GQVC[+418.1]LPVISAENWKPATK	GQVC#LPVISAENWKPATK	590.545	4	C144	74.63	257784424	-0.230336	BTD
NP_958781.1|	PLEC	|PLEC|5339|Q15149|plectin isoform 1e [Homo sapiens]	GRLCFEGLR	GRLC[+418.1]FEGLR	GRLC#FEGLR	490.232	3	C2951	65.81	171033840	-0.271426	BTD
NP_004437.2|	EPRS	|EPRS|2058|P07814|bifunctional glutamate/proline--tRNA ligase [Homo sapiens]	GSQFGQSCCLR	GSQFGQSC[+418.1]C[+57]LR	GSQFGQSC#CLR	830.837	2	C336	61.3	351840872	-0.185785	BTD
NP_055427.2|	FAM120A	|FAM120A|23196|Q9NZB2|constitutive coactivator of PPAR-gamma-like protein 1 [Homo sapiens]	GSQMGTVQPIPCLLSMPTR	GSQM[+16]GTVQPIPC[+418.1]LLSM[+16]PTR	GSQMGTVQPIPC#LLSMPTR	822.714	3	C531	78.62	407352960	-0.159491	BTD
NP_203744.1|	MICALL1	|MICALL1|85377|Q8N3F8|MICAL-like protein 1 [Homo sapiens]	GSSGPQPAKPCSGATPTPLLLVGDR	GSSGPQPAKPC[+418.1]SGATPTPLLLVGDR	GSSGPQPAKPC#SGATPTPLLLVGDR	942.13	3	C597	71.45	110060432	-0.300307	BTD
NP_777614.1|	ATP2A3	|ATP2A3|489|Q93084;A8K9K1|sarcoplasmic/endoplasmic reticulum calcium ATPase 3 isoform d [Homo sapiens]	GTAVAICR	GTAVAIC[+418.1]R	GTAVAIC#R	604.781	2	C636	61.88	1007515520	0.124784	BTD
NP_001143.2|	SLC25A5	|SLC25A5|292|P05141;Q6NVC0|ADP/ATP translocase 2 [Homo sapiens]	GTDIMYTGTLDCWR	GTDIM[+16]YTGTLDC[+418.1]WR	GTDIMYTGTLDC#WR	1033.43	2	C257	74.72	42513045	-0.332302	BTD
NP_001143.2|	SLC25A5	|SLC25A5|292|P05141;Q6NVC0|ADP/ATP translocase 2 [Homo sapiens]	GTDIMYTGTLDCWR	GTDIM[+16]YTGTLDC[+418.1]WR	GTDIMYTGTLDC#WR	689.287	3	C257	74.72	53847552	-0.326933	BTD
NP_060542.4|	HEATR1	|HEATR1|55127|Q9H583;A2VDI1;B2RWN5|HEAT repeat-containing protein 1 [Homo sapiens]	GTLITHCYK	GTLITHC[+418.1]YK	GTLITHC#YK	485.225	3	C182	55.13	130592156	-0.290582	BTD
NP_002799.3|	PSMD2	|PSMD2|5708|Q13200|26S proteasome non-ATPase regulatory subunit 2 [Homo sapiens]	GTLTLCPYHSDR	GTLTLC[+418.1]PYHSDR	GTLTLC#PYHSDR	890.893	2	C779	65.87	449947168	-0.139315	BTD
NP_002799.3|	PSMD2	|PSMD2|5708|Q13200|26S proteasome non-ATPase regulatory subunit 2 [Homo sapiens]	GTLTLCPYHSDR	GTLTLC[+418.1]PYHSDR	GTLTLC#PYHSDR	594.264	3	C779	65.87	2229472512	0.703579	BTD
NP_003125.3|	SRP14	|SRP14|6727|P37108|signal recognition particle 14 kDa protein [Homo sapiens]	GTVEGFEPADNKCLLR	GTVEGFEPADNKC[+418.1]LLR	GTVEGFEPADNKC#LLR	723.003	3	C56	68.56	765450560	0.0101267	BTD
NP_001349.2|	DHX15	|DHX15|1665|O43143|putative pre-mRNA-splicing factor ATP-dependent RNA helicase DHX15 [Homo sapiens]	GVACTQPR	GVAC[+418.1]TQPR	GVAC#TQPR	625.276	2	C190	50.76	133962496	-0.288985	BTD
NP_004387.1|	DDX5	|DDX5|1655|P17844|probable ATP-dependent RNA helicase DDX5 [Homo sapiens]	GVEICIATPGR	GVEIC[+418.1]IATPGR	GVEIC#IATPGR	767.363	2	C221	70.59	196569608	-0.259331	BTD
NP_036226.1|	PRDX5	|PRDX5|25824|P30044|peroxiredoxin-5, mitochondrial isoform a precursor [Homo sapiens]	GVLFGVPGAFTPGCSK	GVLFGVPGAFTPGC[+418.1]SK	GVLFGVPGAFTPGC#SK	977.963	2	C100	81.79	171020408	-0.271433	BTD
NP_036226.1|	PRDX5	|PRDX5|25824|P30044|peroxiredoxin-5, mitochondrial isoform a precursor [Homo sapiens]	GVLFGVPGAFTPGCSK	GVLFGVPGAFTPGC[+418.1]SK	GVLFGVPGAFTPGC#SK	652.311	3	C100	81.79	208146344	-0.253847	BTD
NP_006494.1|	PSMC4	|PSMC4|5704|P43686;A8K2M0|26S protease regulatory subunit 6B isoform 1 [Homo sapiens]	GVLMYGPPGCGK	GVLM[+16]YGPPGC[+418.1]GK	GVLMYGPPGC#GK	806.851	2	C210	65.8	325166672	-0.198419	BTD
NP_008835.5|	PRKDC	|PRKDC|5591|P78527|DNA-dependent protein kinase catalytic subunit isoform 1 [Homo sapiens]	GYGLFAGPCK	GYGLFAGPC[+418.1]K	GYGLFAGPC#K	715.815	2	C373	72.25	362396112	-0.180785	BTD
NP_005909.2|	MDH2	|MDH2|4191|P40926|malate dehydrogenase, mitochondrial precursor [Homo sapiens]	GYLGPEQLPDCLK	GYLGPEQLPDC[+418.1]LK	GYLGPEQLPDC#LK	925.926	2	C89	76.36	56671756	-0.325595	BTD
NP_003741.1|	EIF3A	|EIF3A|8661|Q14152|eukaryotic translation initiation factor 3 subunit A [Homo sapiens]	HCDLQVR	HC[+418.1]DLQVR	HC#DLQVR	644.782	2	C478	53.75	621460576	-0.0580759	BTD
NP_003741.1|	EIF3A	|EIF3A|8661|Q14152|eukaryotic translation initiation factor 3 subunit A [Homo sapiens]	HCDLQVR	HC[+418.1]DLQVR	HC#DLQVR	430.19	3	C478	53.75	561969392	-0.0862547	BTD
NP_060708.1|	AGK	|AGK|55750|Q53H12;A4D1U5|acylglycerol kinase, mitochondrial precursor [Homo sapiens]	HCDNLLR	HC[+418.1]DNLLR	HC#DNLLR	644.782	2	C34	55.47	63335746	-0.322439	BTD
NP_002939.2|	RPL15	|RPL15|6138|P61313|60S ribosomal protein L15 isoform 1 [Homo sapiens]	HCGALR	HC[+418.1]GALR	HC#GALR	537.734	2	C110	46.32	4003088000	1.54367	BTD
NP_001014446.1|	OCIAD2	|OCIAD2|132299|Q56VL3|OCIA domain-containing protein 2 isoform 1 [Homo sapiens]	HCLLTCEECK	HC[+418.1]LLTC[+57]EEC[+57]K	HC#LLTCEECK	855.841	2	C130	61.51	674654944	-0.0328798	BTD
NP_001014446.1|	OCIAD2	|OCIAD2|132299|Q56VL3|OCIA domain-containing protein 2 isoform 1 [Homo sapiens]	HCLLTCEECK	HC[+418.1]LLTC[+57]EEC[+57]K	HC#LLTCEECK	570.896	3	C130	61.51	846126592	0.0483399	BTD
NP_004588.1|	SNRPD2	|SNRPD2|6633|P62316|small nuclear ribonucleoprotein Sm D2 isoform 1 [Homo sapiens]	HCNMVLENVK	HC[+418.1]NM[+16]VLENVK	HC#NMVLENVK	810.852	2	C63	52.78	945071104	0.0952062	BTD
NP_004588.1|	SNRPD2	|SNRPD2|6633|P62316|small nuclear ribonucleoprotein Sm D2 isoform 1 [Homo sapiens]	HCNMVLENVK	HC[+418.1]NM[+16]VLENVK	HC#NMVLENVK	540.904	3	C63	52.78	1583990208	0.397838	BTD
NP_612632.1|	CTTN	|CTTN|2017|Q14247;Q53HG7|src substrate cortactin isoform b [Homo sapiens]	HCSQVDSVR	HC[+418.1]SQVDSVR	HC#SQVDSVR	483.54	3	C112	45.9	46974828	-0.330188	BTD
NP_002818.1|	PTPN1	|PTPN1|5770|P18031;A8K3M3|tyrosine-protein phosphatase non-receptor type 1 [Homo sapiens]	HEASDFPCR	HEASDFPC[+418.1]R	HEASDFPC#R	493.864	3	C32	55.96	445873184	-0.141245	BTD
NP_008835.5|	PRKDC	|PRKDC|5591|P78527|DNA-dependent protein kinase catalytic subunit isoform 1 [Homo sapiens]	HECMAPLTALVK	HEC[+418.1]M[+16]APLTALVK	HEC#MAPLTALVK	582.939	3	C2093	66.05	441760448	-0.143193	BTD
NP_057164.3|	GLOD4	|GLOD4|51031|Q9HC38|glyoxalase domain-containing protein 4 [Homo sapiens]	HEEFEEGCK	HEEFEEGC[+418.1]K	HEEFEEGC#K	509.196	3	C41	49.9	180093816	-0.267135	BTD
NP_005498.1|	CFL1	|CFL1|1072|P23528|cofilin-1 [Homo sapiens]	HELQANCYEEVK	HELQANC[+418.1]YEEVK	HELQANC#YEEVK	940.901	2	C139	53.79	371095968	-0.176664	BTD
NP_005498.1|	CFL1	|CFL1|1072|P23528|cofilin-1 [Homo sapiens]	HELQANCYEEVK	HELQANC[+418.1]YEEVK	HELQANC#YEEVK	627.603	3	C139	53.79	1033846784	0.137256	BTD
NP_005498.1|	CFL1	|CFL1|1072|P23528|cofilin-1 [Homo sapiens]	HELQANCYEEVKDR	HELQANC[+418.1]YEEVKDR	HELQANC#YEEVKDR	1076.46	2	C139	50.26	123159244	-0.294103	BTD
NP_005498.1|	CFL1	|CFL1|1072|P23528|cofilin-1 [Homo sapiens]	HELQANCYEEVKDR	HELQANC[+418.1]YEEVKDR	HELQANC#YEEVKDR	717.979	3	C139	50.26	3094740480	1.11342	BTD
NP_005498.1|	CFL1	|CFL1|1072|P23528|cofilin-1 [Homo sapiens]	HELQANCYEEVKDR	HELQANC[+418.1]YEEVKDR	HELQANC#YEEVKDR	538.736	4	C139	50.26	3674758272	1.38816	BTD
NP_005498.1|	CFL1	|CFL1|1072|P23528|cofilin-1 [Homo sapiens]	HELQANCYEEVKDRCTLAEK	HELQANC[+57]YEEVKDRC[+418.1]TLAEK	HELQANCYEEVKDRC#TLAEK	952.091	3	C147	53.14	839302176	0.0451075	BTD
NP_005498.1|	CFL1	|CFL1|1072|P23528|cofilin-1 [Homo sapiens]	HELQANCYEEVKDRCTLAEK	HELQANC[+57]YEEVKDRC[+418.1]TLAEK	HELQANCYEEVKDRC#TLAEK	714.32	4	C147	53.14	1923977984	0.558878	BTD
NP_004334.1|	CALR	|CALR|811|P27797|calreticulin precursor [Homo sapiens]	HEQNIDCGGGYVK	HEQNIDC[+418.1]GGGYVK	HEQNIDC#GGGYVK	919.385	2	C105	52.24	111057340	-0.299835	BTD
NP_004334.1|	CALR	|CALR|811|P27797|calreticulin precursor [Homo sapiens]	HEQNIDCGGGYVK	HEQNIDC[+418.1]GGGYVK	HEQNIDC#GGGYVK	613.259	3	C105	52.24	486223840	-0.122133	BTD
NP_006861.1|	DSTN	|DSTN|11034|P60981|destrin isoform a [Homo sapiens]	HFVGMLPEKDCR	HFVGM[+16]LPEKDC[+418.1]R	HFVGMLPEKDC#R	622.609	3	C80	51.44	238472528	-0.239483	BTD
NP_859048.1|	PRDX1	|PRDX1|5052|Q06830|peroxiredoxin-1 [Homo sapiens]	HGEVCPAGWKPGSDTIKPDVQK	HGEVC[+418.1]PAGWKPGSDTIKPDVQK	HGEVC#PAGWKPGSDTIKPDVQK	692.58	4	C173	54.54	660402816	-0.0396305	BTD
NP_000875.2|	IMPDH2	|IMPDH2|3615|P12268|inosine-5'-monophosphate dehydrogenase 2 [Homo sapiens]	HGFCGIPITDTGR	HGFC[+418.1]GIPITDTGR	HGFC#GIPITDTGR	896.401	2	C140	68.43	698099648	-0.0217749	BTD
NP_000875.2|	IMPDH2	|IMPDH2|3615|P12268|inosine-5'-monophosphate dehydrogenase 2 [Homo sapiens]	HGFCGIPITDTGR	HGFC[+418.1]GIPITDTGR	HGFC#GIPITDTGR	597.936	3	C140	68.43	1637584576	0.423224	BTD
NP_004714.2|	ARHGEF2	|ARHGEF2|9181|Q92974|rho guanine nucleotide exchange factor 2 isoform 3 [Homo sapiens]	HGVQECILLVTQR	HGVQEC[+418.1]ILLVTQR	HGVQEC#ILLVTQR	638.65	3	C355	75.43	132655536	-0.289605	BTD
NP_056988.3|	EIF5B	|EIF5B|9669|O60841;Q8N5A0|eukaryotic translation initiation factor 5B [Homo sapiens]	HIAVFPCK	HIAVFPC[+418.1]K	HIAVFPC#K	666.815	2	C1092	63.95	319559872	-0.201075	BTD
NP_056988.3|	EIF5B	|EIF5B|9669|O60841;Q8N5A0|eukaryotic translation initiation factor 5B [Homo sapiens]	HIAVFPCK	HIAVFPC[+418.1]K	HIAVFPC#K	444.879	3	C1092	63.95	201778384	-0.256864	BTD
NP_006363.4|	SYNCRIP	|SYNCRIP|10492|O60506|heterogeneous nuclear ribonucleoprotein Q isoform 1 [Homo sapiens]	HIGVCISVANNR	HIGVC[+418.1]ISVANNR	HIGVC#ISVANNR	850.903	2	C237	62.59	117375488	-0.296842	BTD
NP_004136.2|	MYO9B	|MYO9B|4650|Q13459;B0I1T6;Q8WVD2|unconventional myosin-IXb isoform 1 [Homo sapiens]	HIQSCK	HIQSC[+418.1]K	HIQSC#K	567.247	2	C1169	40.02	165494664	-0.27405	BTD
NP_057151.1|	MRPS18C	|MRPS18C|51023|Q9Y3D5|28S ribosomal protein S18c, mitochondrial [Homo sapiens]	HITGLCGK	HITGLC[+418.1]GK	HITGLC#GK	623.789	2	C100	55.94	245571744	-0.23612	BTD
NP_006592.3|	PTGES3	|PTGES3|10728|Q15185|prostaglandin E synthase 3 [Homo sapiens]	HLNEIDLFHCIDPNDSK	HLNEIDLFHC[+418.1]IDPNDSK	HLNEIDLFHC#IDPNDSK	607.773	4	C58	76.3	125147920	-0.293161	BTD
NP_001164014.1|	PGAM5	|PGAM5|192111|Q96HS1;A9LN06|serine/threonine-protein phosphatase PGAM5, mitochondrial isoform 1 [Homo sapiens]	HLPGVCK	HLPGVC[+418.1]K	HLPGVC#K	391.184	3	C168	54.31	335299888	-0.19362	BTD
NP_004578.2|	RRBP1	|RRBP1|6238|Q9P2E9|ribosome-binding protein 1 [Homo sapiens]	HMAAASAECQNYAK	HM[+16]AAASAEC[+418.1]QNYAK	HMAAASAEC#QNYAK	643.596	3	C783	45.09	127154052	-0.29221	BTD
NP_683877.1|	PSMA1	|PSMA1|5682|P25786|proteasome subunit alpha type-1 isoform 1 [Homo sapiens]	HMSEFMECNLNELVK	HM[+16]SEFM[+16]EC[+418.1]NLNELVK	HMSEFMEC#NLNELVK	758.649	3	C188	67.86	335988960	-0.193293	BTD
NP_115865.1|	MRPS6	|MRPS6|64968|P82932|28S ribosomal protein S6, mitochondrial [Homo sapiens]	HPLTQELKECEGIVPVPLAEK	HPLTQELKEC[+418.1]EGIVPVPLAEK	HPLTQELKEC#EGIVPVPLAEK	687.849	4	C105	72.83	315553680	-0.202973	BTD
NP_620305.1|	SON	|SON|6651|P18583|protein SON isoform F [Homo sapiens]	HPVSALMEICNK	HPVSALM[+16]EIC[+418.1]NK	HPVSALMEIC#NK	592.602	3	C2380	63.59	89772556	-0.309917	BTD
NP_005318.3|	HADH	|HADH|3033|Q16836|hydroxyacyl-coenzyme A dehydrogenase, mitochondrial isoform 2 precursor [Homo sapiens]	HPVSCK	HPVSC[+418.1]K	HPVSC#K	544.736	2	C211	39.66	802174848	0.0275216	BTD
NP_005318.3|	HADH	|HADH|3033|Q16836|hydroxyacyl-coenzyme A dehydrogenase, mitochondrial isoform 2 precursor [Homo sapiens]	HPVSCK	HPVSC[+418.1]K	HPVSC#K	363.493	3	C211	39.66	134804724	-0.288587	BTD
NP_055335.2|	MYBBP1A	|MYBBP1A|10514|Q9BQG0|myb-binding protein 1A isoform 2 [Homo sapiens]	HQACLLLQK	HQAC[+418.1]LLLQK	HQAC#LLLQK	736.363	2	C1031	65.01	430504704	-0.148525	BTD
NP_002650.1|	PLAUR	|PLAUR|5329|Q03405|urokinase plasminogen activator surface receptor isoform 1 precursor [Homo sapiens]	HQSLQCR	HQSLQC[+418.1]R	HQSLQC#R	645.279	2	C137	45.56	227513288	-0.244674	BTD
NP_000261.2|	PNP	|PNP|4860|P00491|purine nucleoside phosphorylase [Homo sapiens]	HRPQVAIICGSGLGGLTDK	HRPQVAIIC[+418.1]GSGLGGLTDK	HRPQVAIIC#GSGLGGLTDK	780.724	3	C31	67.17	108970008	-0.300823	BTD
NP_036602.1|	TNPO3	|TNPO3|23534|Q9Y5L0;B3KMX1|transportin-3 isoform 1 [Homo sapiens]	HTNPIVENGQTHPCQK	HTNPIVENGQTHPC[+418.1]QK	HTNPIVENGQTHPC#QK	741.002	3	C634	45.41	245040656	-0.236372	BTD
NP_112226.2|	SPRY4	|SPRY4|81848|Q9C004|protein sprouty homolog 4 isoform 1 [Homo sapiens]	HTNSVICK	HTNSVIC[+418.1]K	HTNSVIC#K	660.297	2	C306	50.67	672612320	-0.0338473	BTD
NP_112226.2|	SPRY4	|SPRY4|81848|Q9C004|protein sprouty homolog 4 isoform 1 [Homo sapiens]	HTNSVICK	HTNSVIC[+418.1]K	HTNSVIC#K	440.534	3	C306	50.67	1030140672	0.1355	BTD
NP_003748.1|	EIF3I	|EIF3I|8668|Q13347;Q5U0F4|eukaryotic translation initiation factor 3 subunit I [Homo sapiens]	HVLTGSADNSCR	HVLTGSADNSC[+418.1]R	HVLTGSADNSC#R	839.359	2	C76	46.74	55026526	-0.326374	BTD
NP_003748.1|	EIF3I	|EIF3I|8668|Q13347;Q5U0F4|eukaryotic translation initiation factor 3 subunit I [Homo sapiens]	HVLTGSADNSCR	HVLTGSADNSC[+418.1]R	HVLTGSADNSC#R	559.908	3	C76	46.74	279665936	-0.219971	BTD
NP_009103.2|	NUP50	|NUP50|10762|Q9UKX7|nuclear pore complex protein Nup50 isoform b [Homo sapiens]	HVNTNPLCDLTPIFK	HVNTNPLC[+418.1]DLTPIFK	HVNTNPLC#DLTPIFK	710.676	3	C181	81.48	246467760	-0.235696	BTD
NP_001008897.1|	TCP1	|TCP1|6950|E7EQR6|T-complex protein 1 subunit alpha isoform b [Homo sapiens]	IACLDFSLQK	IAC[+418.1]LDFSLQK	IAC#LDFSLQK	778.368	2	C81	78.54	60258124	-0.323896	BTD
NP_001153706.1|	ATP1A1	|ATP1A1|476|P05023;B7Z3U6|sodium/potassium-transporting ATPase subunit alpha-1 isoform d [Homo sapiens]	IAGLCNR	IAGLC[+418.1]NR	IAGLC#NR	582.768	2	C397	61.77	76861766	-0.316032	BTD
NP_036205.1|	CCT5	|CCT5|22948|P48643|T-complex protein 1 subunit epsilon [Homo sapiens]	IAILTCPFEPPKPK	IAILTC[+418.1]PFEPPKPK	IAILTC#PFEPPKPK	986.507	2	C253	75.63	286926456	-0.216532	BTD
NP_036205.1|	CCT5	|CCT5|22948|P48643|T-complex protein 1 subunit epsilon [Homo sapiens]	IAILTCPFEPPKPK	IAILTC[+418.1]PFEPPKPK	IAILTC#PFEPPKPK	658.007	3	C253	75.63	4813436160	1.92751	BTD
NP_036205.1|	CCT5	|CCT5|22948|P48643|T-complex protein 1 subunit epsilon [Homo sapiens]	IAILTCPFEPPKPK	IAILTC[+418.1]PFEPPKPK	IAILTC#PFEPPKPK	493.757	4	C253	75.63	161972840	-0.275718	BTD
NP_000356.1|	TPI1	|TPI1|7167|P60174;Q53HE2|triosephosphate isomerase isoform 1 [Homo sapiens]	IAVAAQNCYK	IAVAAQNC[+418.1]YK	IAVAAQNC#YK	749.845	2	C67	56.96	1195382848	0.21377	BTD
NP_000356.1|	TPI1	|TPI1|7167|P60174;Q53HE2|triosephosphate isomerase isoform 1 [Homo sapiens]	IAVAAQNCYK	IAVAAQNC[+418.1]YK	IAVAAQNC#YK	500.232	3	C67	56.96	188800728	-0.263011	BTD
NP_000966.2|	RPL11	|RPL11|6135|P62913;Q5VVD0|60S ribosomal protein L11 isoform 1 [Homo sapiens]	IAVHCTVR	IAVHC[+418.1]TVR	IAVHC#TVR	658.816	2	C72	53.69	1009880544	0.125904	BTD
NP_000966.2|	RPL11	|RPL11|6135|P62913;Q5VVD0|60S ribosomal protein L11 isoform 1 [Homo sapiens]	IAVHCTVR	IAVHC[+418.1]TVR	IAVHC#TVR	439.546	3	C72	53.69	1862246720	0.529638	BTD
NP_006576.2|	CCT8	|CCT8|10694|P50990|T-complex protein 1 subunit theta [Homo sapiens]	IAVYSCPFDGMITETK	IAVYSC[+418.1]PFDGM[+16]ITETK	IAVYSC#PFDGMITETK	1104.99	2	C244	74.64	156372104	-0.278371	BTD
NP_006576.2|	CCT8	|CCT8|10694|P50990|T-complex protein 1 subunit theta [Homo sapiens]	IAVYSCPFDGMITETK	IAVYSC[+418.1]PFDGM[+16]ITETK	IAVYSC#PFDGMITETK	736.993	3	C244	74.64	255956536	-0.231201	BTD
NP_002873.1|	RANBP1	|RANBP1|5902|P43487|ran-specific GTPase-activating protein [Homo sapiens]	ICANHYITPMMELKPNAGSDR	IC[+418.1]ANHYITPM[+16]M[+16]ELKPNAGSDR	IC#ANHYITPMMELKPNAGSDR	937.75	3	C99	55.36	170601712	-0.271631	BTD
NP_002873.1|	RANBP1	|RANBP1|5902|P43487|ran-specific GTPase-activating protein [Homo sapiens]	ICANHYITPMMELKPNAGSDR	IC[+418.1]ANHYITPM[+16]M[+16]ELKPNAGSDR	IC#ANHYITPMMELKPNAGSDR	703.564	4	C99	55.36	936080576	0.0909478	BTD
NP_004915.2|	ACTN4	|ACTN4|81|O43707|alpha-actinin-4 [Homo sapiens]	ICDQWDALGSLTHSR	IC[+418.1]DQWDALGSLTHSR	IC#DQWDALGSLTHSR	707.316	3	C499	74.51	139154180	-0.286526	BTD
NP_001077059.1|	TMEM214	|TMEM214|54867|Q6NUQ4|transmembrane protein 214 isoform 2 [Homo sapiens]	ICIQAILQDKPK	IC[+418.1]IQAILQDKPK	IC#IQAILQDKPK	596.644	3	C177	75.3	350230336	-0.186548	BTD
NP_002784.1|	PSMB1	|PSMB1|5689|P20618|proteasome subunit beta type-1 [Homo sapiens]	ICIVTK	IC[+418.1]IVTK	IC#IVTK	547.772	2	C224	66.29	984058560	0.113673	BTD
NP_055861.3|	SETX	|SETX|23064|Q7Z333|probable helicase senataxin [Homo sapiens]	ICLIHGPPGTGK	IC[+418.1]LIHGPPGTGK	IC#LIHGPPGTGK	537.599	3	C1959	68.25	271103472	-0.224027	BTD
NP_008835.5|	PRKDC	|PRKDC|5591|P78527|DNA-dependent protein kinase catalytic subunit isoform 1 [Homo sapiens]	ICSKPVVLPK	IC[+418.1]SKPVVLPK	IC#SKPVVLPK	751.399	2	C491	56.72	343808432	-0.189589	BTD
NP_008835.5|	PRKDC	|PRKDC|5591|P78527|DNA-dependent protein kinase catalytic subunit isoform 1 [Homo sapiens]	ICSKPVVLPK	IC[+418.1]SKPVVLPK	IC#SKPVVLPK	501.268	3	C491	56.72	1368048256	0.295555	BTD
NP_057475.2|	NOP16	|NOP16|51491|Q9Y3C1;Q05D05|nucleolar protein 16 isoform 3 [Homo sapiens]	IECSHIR	IEC[+418.1]SHIR	IEC#SHIR	638.284	2	C36	48.84	494613872	-0.118158	BTD
NP_057475.2|	NOP16	|NOP16|51491|Q9Y3C1;Q05D05|nucleolar protein 16 isoform 3 [Homo sapiens]	IECSHIR	IEC[+418.1]SHIR	IEC#SHIR	425.858	3	C36	48.84	2091583936	0.638266	BTD
NP_000960.2|	RPL5	|RPL5|6125|P46777;A2RUM7|60S ribosomal protein L5 [Homo sapiens]	IEGDMIVCAAYAHELPK	IEGDM[+16]IVC[+418.1]AAYAHELPK	IEGDMIVC#AAYAHELPK	765.348	3	C76	68.1	510141424	-0.110804	BTD
NP_001231903.1|	PPP1CC	|PPP1CC|5501|P36873|serine/threonine-protein phosphatase PP1-gamma catalytic subunit isoform 2 [Homo sapiens]	IFCCHGGLSPDLQSMEQIR	IFC[+57]C[+418.1]HGGLSPDLQSM[+16]EQIR	IFCC#HGGLSPDLQSMEQIR	875.717	3	C172	65.65	523967680	-0.104255	BTD
NP_061832.2|	DAZAP1	|DAZAP1|26528|Q96EP5|DAZ-associated protein 1 isoform b [Homo sapiens]	IFVGGIPHNCGETELR	IFVGGIPHNC[+418.1]GETELR	IFVGGIPHNC#GETELR	720.672	3	C124	65.59	184390144	-0.2651	BTD
NP_001655.1|	RHOA	|RHOA|387|P61586;Q9BVT0|transforming protein RhoA precursor [Homo sapiens]	IGAFGYMECSAK	IGAFGYM[+16]EC[+418.1]SAK	IGAFGYMEC#SAK	855.852	2	C159	63.83	201144544	-0.257164	BTD
NP_068598.1|	FASTKD5	|FASTKD5|60493|Q7L8L6|FAST kinase domain-containing protein 5 [Homo sapiens]	IGDLACANIQHLSSR	IGDLAC[+418.1]ANIQHLSSR	IGDLAC#ANIQHLSSR	1008.47	2	C345	65.7	41384064	-0.332836	BTD
NP_068598.1|	FASTKD5	|FASTKD5|60493|Q7L8L6|FAST kinase domain-containing protein 5 [Homo sapiens]	IGDLACANIQHLSSR	IGDLAC[+418.1]ANIQHLSSR	IGDLAC#ANIQHLSSR	672.652	3	C345	65.7	439558080	-0.144236	BTD
NP_001180345.1|	DDX3X	|DDX3X|1654|-|ATP-dependent RNA helicase DDX3X isoform 2 [Homo sapiens]	IGLDFCK	IGLDFC[+418.1]K	IGLDFC#K	607.273	2	C341	75.68	335699776	-0.19343	BTD
NP_006421.2|	CCT4	|CCT4|10575|P50991|T-complex protein 1 subunit delta isoform a [Homo sapiens]	IGLIQFCLSAPK	IGLIQFC[+418.1]LSAPK	IGLIQFC#LSAPK	854.433	2	C252	88.18	23371846	-0.341368	BTD
NP_001279.2|	CLIC1	|CLIC1|1192|O00299;Q5SRT3|chloride intracellular channel protein 1 [Homo sapiens]	IGNCPFSQR	IGNC[+418.1]PFSQR	IGNC#PFSQR	720.313	2	C24	64.35	3058960384	1.09648	BTD
NP_001279.2|	CLIC1	|CLIC1|1192|O00299;Q5SRT3|chloride intracellular channel protein 1 [Homo sapiens]	IGNCPFSQR	IGNC[+418.1]PFSQR	IGNC#PFSQR	480.545	3	C24	64.35	171639264	-0.271139	BTD
NP_573566.2|	LRPPRC	|LRPPRC|10128|P42704;E5KNY5|leucine-rich PPR motif-containing protein, mitochondrial precursor [Homo sapiens]	IHDVLCK	IHDVLC[+418.1]K	IHDVLC#K	623.291	2	C863	57.12	311255456	-0.205008	BTD
NP_573566.2|	LRPPRC	|LRPPRC|10128|P42704;E5KNY5|leucine-rich PPR motif-containing protein, mitochondrial precursor [Homo sapiens]	IHDVLCK	IHDVLC[+418.1]K	IHDVLC#K	415.863	3	C863	57.12	416473008	-0.155171	BTD
NP_060555.2|	IPO9	|IPO9|55705|Q96P70|importin-9 [Homo sapiens]	IHEACMLALGSVK	IHEAC[+418.1]M[+16]LALGSVK	IHEAC#MLALGSVK	602.618	3	C450	63.3	83631816	-0.312825	BTD
NP_004850.1|	CLTC	|CLTC|1213|Q00610|clathrin heavy chain 1 [Homo sapiens]	IHEGCEEPATHNALAK	IHEGC[+418.1]EEPATHNALAK	IHEGC#EEPATHNALAK	1069.48	2	C870	46.16	366828224	-0.178686	BTD
NP_004850.1|	CLTC	|CLTC|1213|Q00610|clathrin heavy chain 1 [Homo sapiens]	IHEGCEEPATHNALAK	IHEGC[+418.1]EEPATHNALAK	IHEGC#EEPATHNALAK	713.319	3	C870	46.16	3013540480	1.07496	BTD
NP_004850.1|	CLTC	|CLTC|1213|Q00610|clathrin heavy chain 1 [Homo sapiens]	IHEGCEEPATHNALAK	IHEGC[+418.1]EEPATHNALAK	IHEGC#EEPATHNALAK	535.241	4	C870	46.16	5328707328	2.17157	BTD
NP_000010.1|	ACAT1	|ACAT1|38|P24752|acetyl-CoA acetyltransferase, mitochondrial precursor [Homo sapiens]	IHMGSCAENTAK	IHM[+16]GSC[+418.1]AENTAK	IHMGSC#AENTAK	565.902	3	C196	40.26	376429968	-0.174138	BTD
NP_001193496.1|	IFI16	|IFI16|3428|Q16666;B4DJT8;H3BLV7|gamma-interferon-inducible protein 16 isoform 1 [Homo sapiens]	IIAIANYVCR	IIAIANYVC[+418.1]R	IIAIANYVC#R	777.384	2	C581	78.7	266273552	-0.226315	BTD
NP_001193496.1|	IFI16	|IFI16|3428|Q16666;B4DJT8;H3BLV7|gamma-interferon-inducible protein 16 isoform 1 [Homo sapiens]	IIAIANYVCR	IIAIANYVC[+418.1]R	IIAIANYVC#R	518.592	3	C581	78.7	129462512	-0.291117	BTD
NP_008835.5|	PRKDC	|PRKDC|5591|P78527|DNA-dependent protein kinase catalytic subunit isoform 1 [Homo sapiens]	IIANALSSEPACLAEIEEDKAR	IIANALSSEPAC[+418.1]LAEIEEDKAR	IIANALSSEPAC#LAEIEEDKAR	921.111	3	C3347	73.6	173062448	-0.270465	BTD
NP_054783.2|	NTMT1	|NTMT1|28989|Q9BV86|alpha N-terminal protein methyltransferase 1A [Homo sapiens]	IICSAGLSLLAEER	IIC[+418.1]SAGLSLLAEER	IIC#SAGLSLLAEER	946.966	2	C195	81.13	309891920	-0.205654	BTD
NP_054783.2|	NTMT1	|NTMT1|28989|Q9BV86|alpha N-terminal protein methyltransferase 1A [Homo sapiens]	IICSAGLSLLAEER	IIC[+418.1]SAGLSLLAEER	IIC#SAGLSLLAEER	631.646	3	C195	81.13	270395952	-0.224362	BTD
NP_001024.1|	RRM1	|RRM1|6240|P23921|ribonucleoside-diphosphate reductase large subunit [Homo sapiens]	IIDINYYPVPEACLSNK	IIDINYYPVPEAC[+418.1]LSNK	IIDINYYPVPEAC#LSNK	790.71	3	C492	80.47	55509968	-0.326146	BTD
NP_001024.1|	RRM1	|RRM1|6240|P23921|ribonucleoside-diphosphate reductase large subunit [Homo sapiens]	IIDINYYPVPEACLSNKR	IIDINYYPVPEAC[+418.1]LSNKR	IIDINYYPVPEAC#LSNKR	842.743	3	C492	74.96	334121792	-0.194178	BTD
NP_006383.2|	NOP56	|NOP56|10528|O00567|nucleolar protein 56 [Homo sapiens]	IINDNATYCR	IINDNATYC[+418.1]R	IINDNATYC#R	800.848	2	C211	58.27	875493312	0.0622498	BTD
NP_006383.2|	NOP56	|NOP56|10528|O00567|nucleolar protein 56 [Homo sapiens]	IINDNATYCR	IINDNATYC[+418.1]R	IINDNATYC#R	534.234	3	C211	58.27	193064016	-0.260991	BTD
NP_001157733.1|	PPIAL4D	|PPIAL4D|645142|F5H284|peptidylprolyl isomerase A (cyclophilin A)-like 4D [Homo sapiens]	IIPGFMCQGGDFTR	IIPGFM[+16]C[+418.1]QGGDFTR	IIPGFMC#QGGDFTR	988.429	2	C62	73.12	659854976	-0.03989	BTD
NP_001157733.1|	PPIAL4D	|PPIAL4D|645142|F5H284|peptidylprolyl isomerase A (cyclophilin A)-like 4D [Homo sapiens]	IIPGFMCQGGDFTR	IIPGFM[+16]C[+418.1]QGGDFTR	IIPGFMC#QGGDFTR	659.288	3	C62	73.12	415750576	-0.155513	BTD
NP_444505.1|	RPLP0	|RPLP0|6175|P05388|60S acidic ribosomal protein P0 [Homo sapiens]	IIQLLDDYPKCFIVGADNVGSK	IIQLLDDYPKC[+418.1]FIVGADNVGSK	IIQLLDDYPKC#FIVGADNVGSK	942.8	3	C27	83.94	79275680	-0.314889	BTD
NP_057018.1|	NOP58	|NOP58|51602|Q9Y2X3|nucleolar protein 58 [Homo sapiens]	IISDNLTYCK	IISDNLTYC[+418.1]K	IISDNLTYC#K	794.363	2	C205	65.45	65895988	-0.321226	BTD
NP_002037.2|	GAPDH	|GAPDH|2597|P04406|glyceraldehyde-3-phosphate dehydrogenase isoform 1 [Homo sapiens]	IISNASCTTNCLAPLAK	IISNASC[+418.1]TTNC[+57]LAPLAK	IISNASC#TTNCLAPLAK	1098.02	2	C152	67.74	13934257664	6.2477	BTD
NP_002037.2|	GAPDH	|GAPDH|2597|P04406|glyceraldehyde-3-phosphate dehydrogenase isoform 1 [Homo sapiens]	IISNASCTTNCLAPLAK	IISNASC[+418.1]TTNC[+57]LAPLAK	IISNASC#TTNCLAPLAK	732.348	3	C152	67.74	21839753216	9.99223	BTD
NP_002037.2|	GAPDH	|GAPDH|2597|P04406|glyceraldehyde-3-phosphate dehydrogenase isoform 1 [Homo sapiens]	IISNASCTTNCLAPLAK	IISNASC[+57]TTNC[+418.1]LAPLAK	IISNASCTTNC#LAPLAK	1098.02	2	C156	72.72	2322906752	0.747835	BTD
NP_002037.2|	GAPDH	|GAPDH|2597|P04406|glyceraldehyde-3-phosphate dehydrogenase isoform 1 [Homo sapiens]	IISNASCTTNCLAPLAK	IISNASC[+57]TTNC[+418.1]LAPLAK	IISNASCTTNC#LAPLAK	732.348	3	C156	72.72	6079710208	2.52729	BTD
NP_001244955.1|	TPI1	|TPI1|7167|B7Z5D8|triosephosphate isomerase isoform 3 [Homo sapiens]	IIYGGSVTGATCK	IIYGGSVTGATC[+418.1]K	IIYGGSVTGATC#K	563.265	3	C136	61.16	307246400	-0.206907	BTD
NP_003290.1|	HSP90B1	|HSP90B1|7184|P14625|endoplasmin precursor [Homo sapiens]	IKCDKEK	IKC[+418.1]DKEK	IKC#DKEK	641.302	2	C138	31.67	440731280	-0.143681	BTD
NP_003290.1|	HSP90B1	|HSP90B1|7184|P14625|endoplasmin precursor [Homo sapiens]	IKCDKEK	IKC[+418.1]DKEK	IKC#DKEK	427.87	3	C138	31.67	1971323008	0.581303	BTD
NP_001092006.1|	USP5	|USP5|8078|P45974|ubiquitin carboxyl-terminal hydrolase 5 isoform 1 [Homo sapiens]	IKCLATEK	IKC[+418.1]LATEK	IKC#LATEK	662.325	2	C471	54.5	398788832	-0.163547	BTD
NP_001092006.1|	USP5	|USP5|8078|P45974|ubiquitin carboxyl-terminal hydrolase 5 isoform 1 [Homo sapiens]	IKCLATEK	IKC[+418.1]LATEK	IKC#LATEK	441.886	3	C471	54.5	770459232	0.0124991	BTD
NP_002958.2|	SAFB	|SAFB|6294|Q15424|scaffold attachment factor B1 isoform 3 [Homo sapiens]	ILDILGETCK	ILDILGETC[+418.1]K	ILDILGETC#K	761.868	2	C225	79.2	359581840	-0.182118	BTD
NP_002958.2|	SAFB	|SAFB|6294|Q15424|scaffold attachment factor B1 isoform 3 [Homo sapiens]	ILDILGETCK	ILDILGETC[+418.1]K	ILDILGETC#K	508.248	3	C225	79.2	167977632	-0.272874	BTD
NP_006588.1|	HSPA8	|HSPA8|3312|P11142;Q53HF2|heat shock cognate 71 kDa protein isoform 1 [Homo sapiens]	ILDKCNEIINWLDK	ILDKC[+418.1]NEIINWLDK	ILDKC#NEIINWLDK	712.348	3	C574	80.84	207688392	-0.254064	BTD
NP_002818.1|	PTPN1	|PTPN1|5770|P18031;A8K3M3|tyrosine-protein phosphatase non-receptor type 1 [Homo sapiens]	ILEPHNGKCR	ILEPHNGKC[+418.1]R	ILEPHNGKC#R	528.919	3	C324	43.95	143261320	-0.284581	BTD
NP_002818.1|	PTPN1	|PTPN1|5770|P18031;A8K3M3|tyrosine-protein phosphatase non-receptor type 1 [Homo sapiens]	ILEPHNGKCR	ILEPHNGKC[+418.1]R	ILEPHNGKC#R	396.941	4	C324	43.95	126567460	-0.292488	BTD
NP_009129.1|	PROSC	|PROSC|11212|O94903|proline synthase co-transcribed bacterial homolog protein [Homo sapiens]	ILSLCPEIK	ILSLC[+418.1]PEIK	ILSLC#PEIK	717.362	2	C86	79.69	56678912	-0.325592	BTD
NP_000427.1|	OXCT1	|OXCT1|5019|P55809|succinyl-CoA:3-ketoacid coenzyme A transferase 1, mitochondrial precursor [Homo sapiens]	IMEKCTLPLTGK	IM[+16]EKC[+418.1]TLPLTGK	IMEKC#TLPLTGK	589.954	3	C456	61.26	384207160	-0.170454	BTD
NP_003277.1|	TOP1	|TOP1|7150|P11387|DNA topoisomerase 1 [Homo sapiens]	IMPEDIIINCSK	IM[+16]PEDIIINC[+418.1]SK	IMPEDIIINC#SK	603.946	3	C386	76.59	105411200	-0.302509	BTD
NP_004437.2|	EPRS	|EPRS|2058|P07814|bifunctional glutamate/proline--tRNA ligase [Homo sapiens]	INEAVECLLSLK	INEAVEC[+418.1]LLSLK	INEAVEC#LLSLK	875.431	2	C856	86.61	323668064	-0.199129	BTD
NP_004437.2|	EPRS	|EPRS|2058|P07814|bifunctional glutamate/proline--tRNA ligase [Homo sapiens]	INEAVECLLSLK	INEAVEC[+418.1]LLSLK	INEAVEC#LLSLK	583.957	3	C856	86.61	355603312	-0.184003	BTD
NP_001092090.1|	PCBP2	|PCBP2|5094|Q15366|poly(rC)-binding protein 2 isoform c [Homo sapiens]	INISEGNCPER	INISEGNC[+418.1]PER	INISEGNC#PER	825.356	2	C54	56.28	549978272	-0.0919344	BTD
NP_060962.2|	PBK	|PBK|55872|Q96KB5|lymphokine-activated killer T-cell-originated protein kinase [Homo sapiens]	INPICNDHYR	INPIC[+418.1]NDHYR	INPIC#NDHYR	554.91	3	C70	55.94	382753744	-0.171142	BTD
NP_000976.1|	RPL17	|RPL17|6139|P18621|60S ribosomal protein L17 isoform a [Homo sapiens]	INPYMSSPCHIEMILTEK	INPYM[+16]SSPC[+418.1]HIEM[+16]ILTEK	INPYMSSPC#HIEMILTEK	852.714	3	C144	74.57	1069218240	0.15401	BTD
NP_008835.5|	PRKDC	|PRKDC|5591|P78527|DNA-dependent protein kinase catalytic subunit isoform 1 [Homo sapiens]	INQVFHGSCITEGNELTK	INQVFHGSC[+418.1]ITEGNELTK	INQVFHGSC#ITEGNELTK	803.372	3	C1904	64.07	1004317856	0.123269	BTD
NP_006358.1|	CAP1	|CAP1|10487|Q01518;D3DPU2|adenylyl cyclase-associated protein 1 [Homo sapiens]	INSITVDNCK	INSITVDNC[+418.1]K	INSITVDNC#K	762.845	2	C375	58.4	149996556	-0.281391	BTD
NP_055426.1|	MDN1	|MDN1|23195|Q9NU22|midasin [Homo sapiens]	INSYCK	INSYC[+418.1]K	INSYC#K	573.241	2	C2192	54.09	151638120	-0.280613	BTD
NP_005989.3|	CCT3	|CCT3|7203|P49368;B3KX11;Q59H77|T-complex protein 1 subunit gamma isoform a [Homo sapiens]	IPGGIIEDSCVLR	IPGGIIEDSC[+418.1]VLR	IPGGIIEDSC#VLR	895.434	2	C213	78.44	198194176	-0.258561	BTD
NP_005989.3|	CCT3	|CCT3|7203|P49368;B3KX11;Q59H77|T-complex protein 1 subunit gamma isoform a [Homo sapiens]	IPGGIIEDSCVLR	IPGGIIEDSC[+418.1]VLR	IPGGIIEDSC#VLR	597.292	3	C213	78.44	116622076	-0.297199	BTD
NP_003676.2|	KHSRP	|KHSRP|8570|Q92945|far upstream element-binding protein 2 [Homo sapiens]	IQQDSGCK	IQQDSGC[+418.1]K	IQQDSGC#K	648.771	2	C176	45.51	504206352	-0.113615	BTD
NP_060697.4|	UBA6	|UBA6|55236|A0AVT1|ubiquitin-like modifier-activating enzyme 6 [Homo sapiens]	IQSGHSLEGCFQVIK	IQSGHSLEGC[+418.1]FQVIK	IQSGHSLEGC#FQVIK	688.661	3	C682	70.3	282241488	-0.218751	BTD
NP_036333.2|	GLG1	|GLG1|2734|Q92896|Golgi apparatus protein 1 isoform 1 precursor [Homo sapiens]	IQVSELCK	IQVSELC[+418.1]K	IQVSELC#K	669.315	2	C291	66.88	455475520	-0.136697	BTD
NP_659731.1|	MAP2K3	|MAP2K3|5606|P46734;Q6FI23|dual specificity mitogen-activated protein kinase kinase 3 isoform B [Homo sapiens]	ISCMSKPPAPNPTPPR	ISC[+418.1]M[+16]SKPPAPNPTPPR	ISC#MSKPPAPNPTPPR	1063.99	2	C29	50.37	52243906	-0.327693	BTD
NP_659731.1|	MAP2K3	|MAP2K3|5606|P46734;Q6FI23|dual specificity mitogen-activated protein kinase kinase 3 isoform B [Homo sapiens]	ISCMSKPPAPNPTPPR	ISC[+418.1]M[+16]SKPPAPNPTPPR	ISC#MSKPPAPNPTPPR	709.666	3	C29	50.37	2084560064	0.634939	BTD
NP_624358.2|	NUP98	|NUP98|4928|P52948|nuclear pore complex protein Nup98-Nup96 isoform 4 [Homo sapiens]	ISEACSLAQQSGDHR	ISEAC[+418.1]SLAQQSGDHR	ISEAC#SLAQQSGDHR	673.96	3	C1330	54.32	133824080	-0.289051	BTD
NP_115710.2|	UTP23	|UTP23|84294|Q9BRU9|rRNA-processing protein UTP23 homolog [Homo sapiens]	ISGPNPLSCLKK	ISGPNPLSC[+418.1]LKK	ISGPNPLSC#LKK	558.95	3	C207	65.85	147242520	-0.282695	BTD
NP_004955.2|	HDAC1	|HDAC1|3065|Q13547;Q6IT96|histone deacetylase 1 [Homo sapiens]	ISICSSDKR	ISIC[+418.1]SSDKR	ISIC#SSDKR	476.22	3	C408	55.15	831247456	0.0412922	BTD
NP_000969.1|	RPL23	|RPL23|9349|P62829|60S ribosomal protein L23 [Homo sapiens]	ISLGLPVGAVINCADNTGAK	ISLGLPVGAVINC[+418.1]ADNTGAK	ISLGLPVGAVINC#ADNTGAK	1166.08	2	C28	85.97	79356400	-0.31485	BTD
NP_000969.1|	RPL23	|RPL23|9349|P62829|60S ribosomal protein L23 [Homo sapiens]	ISLGLPVGAVINCADNTGAK	ISLGLPVGAVINC[+418.1]ADNTGAK	ISLGLPVGAVINC#ADNTGAK	777.721	3	C28	85.97	510998832	-0.110398	BTD
NP_000909.2|	P4HB	|P4HB|5034|P07237|protein disulfide-isomerase precursor [Homo sapiens]	ITEFCHR	ITEFC[+418.1]HR	ITEFC#HR	662.284	2	C343	55.62	275110104	-0.222129	BTD
NP_006421.2|	CCT4	|CCT4|10575|P50991|T-complex protein 1 subunit delta isoform a [Homo sapiens]	ITGCASPGK	ITGC[+418.1]ASPGK	ITGC#ASPGK	626.278	2	C379	51.54	227304352	-0.244773	BTD
NP_112223.1|	TRIM56	|TRIM56|81844|Q9BRZ2|E3 ubiquitin-protein ligase TRIM56 [Homo sapiens]	ITGLCPFGPR	ITGLC[+418.1]PFGPR	ITGLC#PFGPR	739.85	2	C514	78.07	110137240	-0.300271	BTD
NP_001367.2|	DYNC1H1	|DYNC1H1|1778|Q14204|cytoplasmic dynein 1 heavy chain 1 [Homo sapiens]	ITNQVIYLNPPIEECR	ITNQVIYLNPPIEEC[+418.1]R	ITNQVIYLNPPIEEC#R	774.042	3	C978	76.11	183453112	-0.265544	BTD
NP_443091.1|	RFT1	|RFT1|91869|Q96AA3|protein RFT1 homolog [Homo sapiens]	ITQSLCFIHR	ITQSLC[+418.1]FIHR	ITQSLC#FIHR	545.931	3	C448	70.99	166877184	-0.273395	BTD
NP_003277.1|	TOP1	|TOP1|7150|P11387|DNA topoisomerase 1 [Homo sapiens]	ITVAWCK	ITVAWC[+418.1]K	ITVAWC#K	619.788	2	C733	71.46	100357636	-0.304903	BTD
NP_002717.3|	PREP	|PREP|5550|P48147;B2RAH7|prolyl endopeptidase [Homo sapiens]	ITVPFLEQCPIR	ITVPFLEQC[+418.1]PIR	ITVPFLEQC#PIR	917.455	2	C57	84.52	112005388	-0.299386	BTD
NP_002717.3|	PREP	|PREP|5550|P48147;B2RAH7|prolyl endopeptidase [Homo sapiens]	ITVPFLEQCPIR	ITVPFLEQC[+418.1]PIR	ITVPFLEQC#PIR	611.972	3	C57	84.52	147395184	-0.282623	BTD
NP_057149.1|	MRPS16	|MRPS16|51021|Q9Y3D3|28S ribosomal protein S16, mitochondrial [Homo sapiens]	IVAAHNKCPR	IVAAHNKC[+418.1]PR	IVAAHNKC#PR	509.583	3	C41	38.46	94051900	-0.30789	BTD
NP_057149.1|	MRPS16	|MRPS16|51021|Q9Y3D3|28S ribosomal protein S16, mitochondrial [Homo sapiens]	IVAAHNKCPR	IVAAHNKC[+418.1]PR	IVAAHNKC#PR	382.439	4	C41	38.46	125608920	-0.292942	BTD
NP_001307.2|	CSE1L	|CSE1L|1434|P55060|exportin-2 isoform 1 [Homo sapiens]	IVEDEPNKICEADR	IVEDEPNKIC[+418.1]EADR	IVEDEPNKIC#EADR	683.64	3	C85	55.04	403613552	-0.161262	BTD
NP_002878.2|	RARS	|RARS|5917|P54136|arginine--tRNA ligase, cytoplasmic [Homo sapiens]	IVFVPGCSIPLTIVK	IVFVPGC[+418.1]SIPLTIVK	IVFVPGC#SIPLTIVK	668.695	3	C369	90.32	77631252	-0.315667	BTD
NP_776247.3|	RALYL	|RALYL|138046|Q86SE5;B3KT61|RNA-binding Raly-like protein isoform 2 [Homo sapiens]	IVGCSVHK	IVGC[+418.1]SVHK	IVGC#SVHK	630.797	2	C51	50.89	1176543232	0.204846	BTD
NP_776247.3|	RALYL	|RALYL|138046|Q86SE5;B3KT61|RNA-binding Raly-like protein isoform 2 [Homo sapiens]	IVGCSVHK	IVGC[+418.1]SVHK	IVGC#SVHK	420.867	3	C51	50.89	3731533184	1.41505	BTD
NP_001447.2|	FLNA	|FLNA|2316|P21333;Q60FE5;Q6NXF2|filamin-A isoform 1 [Homo sapiens]	IVGPSGAAVPCK	IVGPSGAAVPC[+418.1]K	IVGPSGAAVPC#K	758.868	2	C1018	61.86	1122378368	0.17919	BTD
NP_001447.2|	FLNA	|FLNA|2316|P21333;Q60FE5;Q6NXF2|filamin-A isoform 1 [Homo sapiens]	IVGPSGAAVPCK	IVGPSGAAVPC[+418.1]K	IVGPSGAAVPC#K	506.248	3	C1018	61.86	96884878	-0.306548	BTD
NP_001447.2|	FLNA	|FLNA|2316|P21333;Q60FE5;Q6NXF2|filamin-A isoform 1 [Homo sapiens]	IVGPSGAAVPCKVEPGLGADNSVVR	IVGPSGAAVPC[+418.1]KVEPGLGADNSVVR	IVGPSGAAVPC#KVEPGLGADNSVVR	937.47	3	C1018	66.53	1117343552	0.176805	BTD
NP_003331.1|	UBE2D3	|UBE2D3|7323|P61077|ubiquitin-conjugating enzyme E2 D3 isoform 1 [Homo sapiens]	IYHPNINSNGSICLDILR	IYHPNINSNGSIC[+418.1]LDILR	IYHPNINSNGSIC#LDILR	820.731	3	C85	77.63	382494560	-0.171265	BTD
NP_002942.2|	RPN2	|RPN2|6185|P04844|dolichyl-diphosphooligosaccharide--protein glycosyltransferase subunit 2 isoform 1 precursor [Homo sapiens]	KACTYIR	KAC[+418.1]TYIR	KAC#TYIR	636.797	2	C72	49.87	590221344	-0.0728728	BTD
NP_002942.2|	RPN2	|RPN2|6185|P04844|dolichyl-diphosphooligosaccharide--protein glycosyltransferase subunit 2 isoform 1 precursor [Homo sapiens]	KACTYIR	KAC[+418.1]TYIR	KAC#TYIR	424.867	3	C72	49.87	1022443840	0.131855	BTD
NP_065816.2|	UBR4	|UBR4|23352|Q5T4S7|E3 ubiquitin-protein ligase UBR4 [Homo sapiens]	KACVLQR	KAC[+418.1]VLQR	KAC#VLQR	618.305	2	C546	55.82	129445320	-0.291125	BTD
NP_001000.2|	RPS5	|RPS5|6193|P46782|40S ribosomal protein S5 [Homo sapiens]	KAQCPIVER	KAQC[+418.1]PIVER	KAQC#PIVER	731.352	2	C66	53.39	5593542144	2.29701	BTD
NP_001000.2|	RPS5	|RPS5|6193|P46782|40S ribosomal protein S5 [Homo sapiens]	KAQCPIVER	KAQC[+418.1]PIVER	KAQC#PIVER	487.904	3	C66	53.39	8550220288	3.69748	BTD
NP_004492.2|	HNRNPU	|HNRNPU|3192|Q00839|heterogeneous nuclear ribonucleoprotein U isoform b [Homo sapiens]	KAVVVCPK	KAVVVC[+418.1]PK	KAVVVC#PK	631.325	2	C588	53.66	682286688	-0.0292649	BTD
NP_004492.2|	HNRNPU	|HNRNPU|3192|Q00839|heterogeneous nuclear ribonucleoprotein U isoform b [Homo sapiens]	KAVVVCPK	KAVVVC[+418.1]PK	KAVVVC#PK	421.219	3	C588	53.66	451139696	-0.138751	BTD
NP_004492.2|	HNRNPU	|HNRNPU|3192|Q00839|heterogeneous nuclear ribonucleoprotein U isoform b [Homo sapiens]	KAVVVCPKDEDYK	KAVVVC[+418.1]PKDEDYK	KAVVVC#PKDEDYK	637.971	3	C588	50.79	81639700	-0.313769	BTD
NP_005331.1|	HINT1	|HINT1|3094|P49773|histidine triad nucleotide-binding protein 1 [Homo sapiens]	KCAADLGLNK	KC[+418.1]AADLGLNK	KC#AADLGLNK	725.845	2	C84	55.63	459931392	-0.134586	BTD
NP_005331.1|	HINT1	|HINT1|3094|P49773|histidine triad nucleotide-binding protein 1 [Homo sapiens]	KCAADLGLNK	KC[+418.1]AADLGLNK	KC#AADLGLNK	484.232	3	C84	55.63	1088110944	0.162959	BTD
NP_004386.2|	DBN1	|DBN1|1627|Q16643|drebrin isoform a [Homo sapiens]	KCACASHVAK	KC[+418.1]AC[+57]ASHVAK	KC#ACASHVAK	373.918	4	C96	32.07	391612112	-0.166947	BTD
NP_008835.5|	PRKDC	|PRKDC|5591|P78527|DNA-dependent protein kinase catalytic subunit isoform 1 [Homo sapiens]	KCDSWWAK	KC[+418.1]DSWWAK	KC#DSWWAK	721.305	2	C1629	63.61	103286060	-0.303516	BTD
NP_054862.1|	CD274	|CD274|29126|Q9NZQ7|programmed cell death 1 ligand 1 isoform a precursor [Homo sapiens]	KCGIQDTNSK	KC[+418.1]GIQDTNSK	KC#GIQDTNSK	756.335	2	C272	45.27	669885664	-0.0351388	BTD
NP_054862.1|	CD274	|CD274|29126|Q9NZQ7|programmed cell death 1 ligand 1 isoform a precursor [Homo sapiens]	KCGIQDTNSK	KC[+418.1]GIQDTNSK	KC#GIQDTNSK	504.559	3	C272	45.27	1703142656	0.454276	BTD
NP_002171.2|	IGHMBP2	|IGHMBP2|3508|P38935|DNA-binding protein SMUBP-2 [Homo sapiens]	KCILAGDHK	KC[+418.1]ILAGDHK	KC#ILAGDHK	468.225	3	C395	55.29	263301360	-0.227723	BTD
NP_002171.2|	IGHMBP2	|IGHMBP2|3508|P38935|DNA-binding protein SMUBP-2 [Homo sapiens]	KCILAGDHK	KC[+418.1]ILAGDHK	KC#ILAGDHK	351.421	4	C395	55.29	50817202	-0.328368	BTD
NP_002785.1|	PSMB2	|PSMB2|5690|P49721|proteasome subunit beta type-2 isoform 1 [Homo sapiens]	KCLEELQK	KC[+418.1]LEELQK	KC#LEELQK	704.834	2	C163	53.93	798305600	0.0256889	BTD
NP_002785.1|	PSMB2	|PSMB2|5690|P49721|proteasome subunit beta type-2 isoform 1 [Homo sapiens]	KCLEELQK	KC[+418.1]LEELQK	KC#LEELQK	470.225	3	C163	53.93	1230223232	0.230272	BTD
NP_001896.2|	CTPS1	|CTPS1|1503|P17812|CTP synthase 1 [Homo sapiens]	KCLEEQGLK	KC[+418.1]LEEQGLK	KC#LEEQGLK	733.344	2	C491	52.25	481205152	-0.12451	BTD
NP_001896.2|	CTPS1	|CTPS1|1503|P17812|CTP synthase 1 [Homo sapiens]	KCLEEQGLK	KC[+418.1]LEEQGLK	KC#LEEQGLK	489.232	3	C491	52.25	1023790848	0.132493	BTD
NP_031381.2|	HSP90AB1	|HSP90AB1|3326|P08238|heat shock protein HSP 90-beta [Homo sapiens]	KCLELFSELAEDKENYK	KC[+418.1]LELFSELAEDKENYK	KC#LELFSELAEDKENYK	826.384	3	C412	73.3	363487520	-0.180268	BTD
NP_031381.2|	HSP90AB1	|HSP90AB1|3326|P08238|heat shock protein HSP 90-beta [Homo sapiens]	KCLELFSELAEDKENYK	KC[+418.1]LELFSELAEDKENYK	KC#LELFSELAEDKENYK	620.04	4	C412	73.3	186434168	-0.264132	BTD
NP_031381.2|	HSP90AB1	|HSP90AB1|3326|P08238|heat shock protein HSP 90-beta [Homo sapiens]	KCLELFSELAEDKENYKK	KC[+418.1]LELFSELAEDKENYKK	KC#LELFSELAEDKENYKK	652.063	4	C412	68.4	526262896	-0.103168	BTD
NP_001017963.2|	HSP90AA1	|HSP90AA1|3320|P07900;Q86SX1|heat shock protein HSP 90-alpha isoform 1 [Homo sapiens]	KCLELFTELAEDKENYK	KC[+418.1]LELFTELAEDKENYK	KC#LELFTELAEDKENYK	623.543	4	C542	74.52	178393680	-0.26794	BTD
NP_060621.3|	RIF1	|RIF1|55183|Q5UIP0|telomere-associated protein RIF1 isoform 1 [Homo sapiens]	KCLISEMAK	KC[+418.1]LISEM[+16]AK	KC#LISEMAK	486.226	3	C2274	58.03	221319824	-0.247608	BTD
NP_055994.2|	RRP12	|RRP12|23223|Q5JTH9;B3KMR5|RRP12-like protein isoform 1 [Homo sapiens]	KCLQSLCDLR	KC[+418.1]LQSLC[+57]DLR	KC#LQSLCDLR	827.381	2	C512	62.28	408797360	-0.158807	BTD
NP_001596.2|	AARS	|AARS|16|P49588|alanine--tRNA ligase, cytoplasmic [Homo sapiens]	KCLSVMEAK	KC[+418.1]LSVM[+16]EAK	KC#LSVMEAK	721.827	2	C773	50.65	333639184	-0.194406	BTD
NP_001596.2|	AARS	|AARS|16|P49588|alanine--tRNA ligase, cytoplasmic [Homo sapiens]	KCLSVMEAK	KC[+418.1]LSVM[+16]EAK	KC#LSVMEAK	481.554	3	C773	50.65	707219072	-0.0174554	BTD
NP_006827.1|	GCN1L1	|GCN1L1|10985|Q92616|translational activator GCN1 [Homo sapiens]	KCMLDAALATLNTHGK	KC[+418.1]M[+16]LDAALATLNTHGK	KC#MLDAALATLNTHGK	707.669	3	C1275	68.8	952953600	0.0989399	BTD
NP_006827.1|	GCN1L1	|GCN1L1|10985|Q92616|translational activator GCN1 [Homo sapiens]	KCMLDAALATLNTHGK	KC[+418.1]M[+16]LDAALATLNTHGK	KC#MLDAALATLNTHGK	531.004	4	C1275	68.8	880332512	0.064542	BTD
NP_002931.2|	ABCE1	|ABCE1|6059|P61221|ATP-binding cassette sub-family E member 1 [Homo sapiens]	KCPFGALSIVNLPSNLEK	KC[+418.1]PFGALSIVNLPSNLEK	KC#PFGALSIVNLPSNLEK	783.397	3	C65	82.99	31515890	-0.337511	BTD
NP_056988.3|	EIF5B	|EIF5B|9669|O60841;Q8N5A0|eukaryotic translation initiation factor 5B [Homo sapiens]	KCPFIVALNK	KC[+418.1]PFIVALNK	KC#PFIVALNK	775.897	2	C749	71.02	406113312	-0.160078	BTD
NP_056988.3|	EIF5B	|EIF5B|9669|O60841;Q8N5A0|eukaryotic translation initiation factor 5B [Homo sapiens]	KCPFIVALNK	KC[+418.1]PFIVALNK	KC#PFIVALNK	517.6	3	C749	71.02	884525056	0.0665278	BTD
NP_001006.1|	RPS11	|RPS11|6205|P62280|40S ribosomal protein S11 [Homo sapiens]	KCPFTGNVSIR	KC[+418.1]PFTGNVSIR	KC#PFTGNVSIR	820.39	2	C60	61.7	1323260608	0.27434	BTD
NP_001006.1|	RPS11	|RPS11|6205|P62280|40S ribosomal protein S11 [Homo sapiens]	KCPFTGNVSIR	KC[+418.1]PFTGNVSIR	KC#PFTGNVSIR	547.262	3	C60	61.7	2125897216	0.654519	BTD
NP_002125.3|	HMOX2	|HMOX2|3163|P30519|heme oxygenase 2 [Homo sapiens]	KCPFYAAEQDK	KC[+418.1]PFYAAEQDK	KC#PFYAAEQDK	859.371	2	C265	57.74	1619199168	0.414515	BTD
NP_002125.3|	HMOX2	|HMOX2|3163|P30519|heme oxygenase 2 [Homo sapiens]	KCPFYAAEQDK	KC[+418.1]PFYAAEQDK	KC#PFYAAEQDK	573.25	3	C265	57.74	2727293696	0.939378	BTD
NP_006810.1|	STIP1	|STIP1|10963|P31948|stress-induced-phosphoprotein 1 [Homo sapiens]	KCQQAEK	KC[+418.1]QQAEK	KC#QQAEK	418.186	3	C339	31.62	1396628864	0.309092	BTD
NP_001015.1|	RPS21	|RPS21|6227|P63220;Q6FGH5|40S ribosomal protein S21 [Homo sapiens]	KCSASNR	KC[+418.1]SASNR	KC#SASNR	592.253	2	C17	32.65	3786834432	1.44124	BTD
NP_001015.1|	RPS21	|RPS21|6227|P63220;Q6FGH5|40S ribosomal protein S21 [Homo sapiens]	KCSASNR	KC[+418.1]SASNR	KC#SASNR	395.171	3	C17	32.65	6589271296	2.76865	BTD
NP_114127.3|	ATAD3B	|ATAD3B|83858|Q5T9A4|ATPase family AAA domain-containing protein 3B [Homo sapiens]	KCSEVAR	KC[+418.1]SEVAR	KC#SEVAR	605.771	2	C515	40.32	633655776	-0.0522995	BTD
NP_114127.3|	ATAD3B	|ATAD3B|83858|Q5T9A4|ATPase family AAA domain-containing protein 3B [Homo sapiens]	KCSEVAR	KC[+418.1]SEVAR	KC#SEVAR	404.183	3	C515	40.32	1186352608	0.209492	BTD
NP_002366.2|	MAP4	|MAP4|4134|P27816|microtubule-associated protein 4 isoform 1 [Homo sapiens]	KCSLPAEEDSVLEK	KC[+418.1]SLPAEEDSVLEK	KC#SLPAEEDSVLEK	655.969	3	C635	61.18	864190752	0.0568962	BTD
NP_006861.1|	DSTN	|DSTN|11034|P60981|destrin isoform a [Homo sapiens]	KCSTPEEIK	KC[+418.1]STPEEIK	KC#STPEEIK	484.888	3	C23	47.83	422307760	-0.152407	BTD
NP_005122.2|	THOC1	|THOC1|9984|Q96FV9|THO complex subunit 1 [Homo sapiens]	KCTLDQAFR	KC[+418.1]TLDQAFR	KC#TLDQAFR	750.342	2	C49	63.34	262775240	-0.227972	BTD
NP_005122.2|	THOC1	|THOC1|9984|Q96FV9|THO complex subunit 1 [Homo sapiens]	KCTLDQAFR	KC[+418.1]TLDQAFR	KC#TLDQAFR	500.564	3	C49	63.34	582814624	-0.0763811	BTD
NP_005013.1|	PFN1	|PFN1|5216|P07737;Q53Y44|profilin-1 [Homo sapiens]	KCYEMASHLR	KC[+418.1]YEM[+16]ASHLR	KC#YEMASHLR	557.907	3	C128	45.01	2568056320	0.863953	BTD
NP_005013.1|	PFN1	|PFN1|5216|P07737;Q53Y44|profilin-1 [Homo sapiens]	KCYEMASHLR	KC[+418.1]YEM[+16]ASHLR	KC#YEMASHLR	418.682	4	C128	45.01	1165091136	-0.289529	BTD
NP_005013.1|	PFN1	|PFN1|5216|P07737;Q53Y44|profilin-1 [Homo sapiens]	KCYEMASHLR	KC[+418.1]YEMASHLR	KC#YEMASHLR	552.576	3	C128	50.8	132815264	0.199421	BTD
NP_001139624.1|	CYP51A1	|CYP51A1|1595|Q16850|lanosterol 14-alpha demethylase isoform 2 [Homo sapiens]	KCYLEQK	KC[+418.1]YLEQK	KC#YLEQK	665.302	2	C238	56.68	339494272	-0.191633	BTD
NP_001139624.1|	CYP51A1	|CYP51A1|1595|Q16850|lanosterol 14-alpha demethylase isoform 2 [Homo sapiens]	KCYLEQK	KC[+418.1]YLEQK	KC#YLEQK	443.87	3	C238	56.68	259122584	-0.229702	BTD
NP_004492.2|	HNRNPU	|HNRNPU|3192|Q00839|heterogeneous nuclear ribonucleoprotein U isoform b [Homo sapiens]	KDCEVVMMIGLPGAGK	KDC[+418.1]EVVMM[+16]IGLPGAGK	KDC#EVVMMIGLPGAGK	694.656	3	C478	71.32	222268736	-0.201607	BTD
NP_004492.2|	HNRNPU	|HNRNPU|3192|Q00839|heterogeneous nuclear ribonucleoprotein U isoform b [Homo sapiens]	KDCEVVMMIGLPGAGK	KDC[+418.1]EVVM[+16]M[+16]IGLPGAGK	KDC#EVVMMIGLPGAGK	1049.48	2	C478	65.31	318437344	0.478347	BTD
NP_004492.2|	HNRNPU	|HNRNPU|3192|Q00839|heterogeneous nuclear ribonucleoprotein U isoform b [Homo sapiens]	KDCEVVMMIGLPGAGK	KDC[+418.1]EVVM[+16]M[+16]IGLPGAGK	KDC#EVVMMIGLPGAGK	699.987	3	C478	65.31	1753960576	-0.247158	BTD
NP_001952.1|	EEF2	|EEF2|1938|P13639|elongation factor 2 [Homo sapiens]	KDEQERCITIK	KDEQERC[+418.1]ITIK	KDEQERC#ITIK	594.283	3	C67	51.89	7590630400	3.24296	BTD
NP_001952.1|	EEF2	|EEF2|1938|P13639|elongation factor 2 [Homo sapiens]	KDEQERCITIK	KDEQERC[+418.1]ITIK	KDEQERC#ITIK	445.964	4	C67	51.89	2141387072	0.661856	BTD
NP_001393.1|	EEF1A1	|EEF1A1|1915|P68104;Q6IPS9|elongation factor 1-alpha 1 [Homo sapiens]	KDGNASGTTLLEALDCILPPTRPTDK	KDGNASGTTLLEALDC[+418.1]ILPPTRPTDK	KDGNASGTTLLEALDC#ILPPTRPTDK	786.889	4	C234	87.92	235941592	-0.240682	BTD
NP_001393.1|	EEF1A1	|EEF1A1|1915|P68104;Q6IPS9|elongation factor 1-alpha 1 [Homo sapiens]	KDGNASGTTLLEALDCILPPTRPTDKPLR	KDGNASGTTLLEALDC[+418.1]ILPPTRPTDKPLR	KDGNASGTTLLEALDC#ILPPTRPTDKPLR	878.448	4	C234	84.95	201869096	-0.256821	BTD
NP_060225.4|	NSUN2	|NSUN2|54888|Q08J23|tRNA (cytosine(34)-C(5))-methyltransferase isoform 1 [Homo sapiens]	KDGVCGPPPSK	KDGVC[+418.1]GPPPSK	KDGVC#GPPPSK	501.564	3	C502	47.33	195307200	-0.259929	BTD
NP_055464.1|	SAFB2	|SAFB2|9667|Q14151|scaffold attachment factor B2 [Homo sapiens]	KECEVKK	KEC[+418.1]EVKK	KEC#EVKK	427.87	3	C498	34.12	385596552	-0.169796	BTD
NP_113584.3|	HUWE1	|HUWE1|10075|Q7Z6Z7|E3 ubiquitin-protein ligase HUWE1 [Homo sapiens]	KECPFVIKPK	KEC[+418.1]PFVIKPK	KEC#PFVIKPK	536.276	3	C471	56.06	227522560	-0.24467	BTD
NP_113584.3|	HUWE1	|HUWE1|10075|Q7Z6Z7|E3 ubiquitin-protein ligase HUWE1 [Homo sapiens]	KECPFVIKPK	KEC[+418.1]PFVIKPK	KEC#PFVIKPK	402.458	4	C471	56.06	161400192	-0.275989	BTD
NP_036256.2|	CHORDC1	|CHORDC1|26973|Q9UHD1|cysteine and histidine-rich domain-containing protein 1 isoform a [Homo sapiens]	KELCELKPK	KELC[+418.1]ELKPK	KELC#ELKPK	502.588	3	C86	50.21	421041344	-0.153007	BTD
NP_733779.1|	SKP1	|SKP1|6500|P63208|S-phase kinase-associated protein 1 isoform b [Homo sapiens]	KENQWCEEK	KENQWC[+418.1]EEK	KENQWC#EEK	806.332	2	C160	52.31	140484488	-0.285896	BTD
NP_003282.2|	TPP2	|TPP2|7174|P29144|tripeptidyl-peptidase 2 [Homo sapiens]	KETGAASFLCR	KETGAASFLC[+418.1]R	KETGAASFLC#R	800.866	2	C28	64.09	570033088	-0.0824352	BTD
NP_863655.1|	ACOT7	|ACOT7|11332|O00154|cytosolic acyl coenzyme A thioester hydrolase isoform hBACHc [Homo sapiens]	KGCVITISGR	KGC[+418.1]VITISGR	KGC#VITISGR	726.36	2	C258	61.93	169129096	-0.272328	BTD
NP_003312.3|	TUFM	|TUFM|7284|P49411|elongation factor Tu, mitochondrial precursor [Homo sapiens]	KGDECELLGHSK	KGDEC[+418.1]ELLGHSK	KGDEC#ELLGHSK	867.385	2	C293	52.66	189112816	-0.262863	BTD
NP_003312.3|	TUFM	|TUFM|7284|P49411|elongation factor Tu, mitochondrial precursor [Homo sapiens]	KGDECELLGHSK	KGDEC[+418.1]ELLGHSK	KGDEC#ELLGHSK	578.592	3	C293	52.66	2875342080	1.0095	BTD
NP_003312.3|	TUFM	|TUFM|7284|P49411|elongation factor Tu, mitochondrial precursor [Homo sapiens]	KGDECELLGHSK	KGDEC[+418.1]ELLGHSK	KGDEC#ELLGHSK	434.196	4	C293	52.66	348878896	-0.187188	BTD
NP_055204.2|	PELP1	|PELP1|27043|Q8IZL8|proline-, glutamic acid- and leucine-rich protein 1 [Homo sapiens]	KGDSNANSDVCAAALR	KGDSNANSDVC[+418.1]AAALR	KGDSNANSDVC#AAALR	670.632	3	C522	56.79	130565076	-0.290595	BTD
NP_788955.1|	PSME1	|PSME1|5720|Q06323;A6NJG9;Q86SZ9|proteasome activator complex subunit 1 isoform 2 [Homo sapiens]	KGEDEDKGPPCGPVNCNEK	KGEDEDKGPPC[+57]GPVNC[+418.1]NEK	KGEDEDKGPPCGPVNC#NEK	831.016	3	C106	46.24	252636160	-0.232774	BTD
NP_788955.1|	PSME1	|PSME1|5720|Q06323;A6NJG9;Q86SZ9|proteasome activator complex subunit 1 isoform 2 [Homo sapiens]	KGEDEDKGPPCGPVNCNEK	KGEDEDKGPPC[+57]GPVNC[+418.1]NEK	KGEDEDKGPPCGPVNC#NEK	623.514	4	C106	46.24	359694352	-0.182065	BTD
NP_002107.3|	HLA-A	|HLA-A|3105|P04439;B1PKY1;B2R7U3|HLA class I histocompatibility antigen, A-1 alpha chain precursor [Homo sapiens]	KGGSYTQAASSDSAQGSDVSLTACK	KGGSYTQAASSDSAQGSDVSLTAC[+418.1]K	KGGSYTQAASSDSAQGSDVSLTAC#K	946.417	3	C363	55.44	293297328	-0.213515	BTD
NP_056988.3|	EIF5B	|EIF5B|9669|O60841;Q8N5A0|eukaryotic translation initiation factor 5B [Homo sapiens]	KGQEVCVK	KGQEVC[+418.1]VK	KGQEVC#VK	436.874	3	C1158	46.45	390066688	-0.167679	BTD
NP_001143.2|	SLC25A5	|SLC25A5|292|P05141;Q6NVC0|ADP/ATP translocase 2 [Homo sapiens]	KGTDIMYTGTLDCWR	KGTDIM[+16]YTGTLDC[+418.1]WR	KGTDIMYTGTLDC#WR	731.985	3	C257	68.28	267529216	-0.22572	BTD
NP_057651.1|	BCCIP	|BCCIP|56647|Q9P287|BRCA2 and CDKN1A-interacting protein isoform BCCIPalpha [Homo sapiens]	KGTQCVEQIQELVLR	KGTQC[+418.1]VEQIQELVLR	KGTQC#VEQIQELVLR	721.363	3	C141	78.22	88176248	-0.310673	BTD
NP_003125.3|	SRP14	|SRP14|6727|P37108|signal recognition particle 14 kDa protein [Homo sapiens]	KGTVEGFEPADNKCLLR	KGTVEGFEPADNKC[+418.1]LLR	KGTVEGFEPADNKC#LLR	765.701	3	C56	63.31	197204440	-0.25903	BTD
NP_003125.3|	SRP14	|SRP14|6727|P37108|signal recognition particle 14 kDa protein [Homo sapiens]	KGTVEGFEPADNKCLLR	KGTVEGFEPADNKC[+418.1]LLR	KGTVEGFEPADNKC#LLR	574.528	4	C56	63.31	103418572	-0.303453	BTD
NP_006176.2|	NUMA1	|NUMA1|4926|Q14980;Q3SYK8;Q4LE64|nuclear mitotic apparatus protein 1 [Homo sapiens]	KHPSSPECLVSAQK	KHPSSPEC[+418.1]LVSAQK	KHPSSPEC#LVSAQK	643.638	3	C80	51.24	351860672	-0.185775	BTD
NP_001307.2|	CSE1L	|CSE1L|1434|P55060|exportin-2 isoform 1 [Homo sapiens]	KICAVGITK	KIC[+418.1]AVGITK	KIC#AVGITK	675.849	2	C842	56.78	3141661056	1.13565	BTD
NP_001307.2|	CSE1L	|CSE1L|1434|P55060|exportin-2 isoform 1 [Homo sapiens]	KICAVGITK	KIC[+418.1]AVGITK	KIC#AVGITK	450.902	3	C842	56.78	4330441088	1.69873	BTD
NP_006744.2|	SURF6	|SURF6|6838|O75683|surfeit locus protein 6 [Homo sapiens]	KICSHSAPEQQAR	KIC[+418.1]SHSAPEQQAR	KIC#SHSAPEQQAR	624.954	3	C19	38.47	166460568	-0.273592	BTD
NP_071933.2|	ATG3	|ATG3|64422|Q9NT62|ubiquitin-like-conjugating enzyme ATG3 [Homo sapiens]	KIVEACK	KIVEAC[+418.1]K	KIVEAC#K	604.794	2	C182	47.28	90631976	-0.30951	BTD
NP_060705.2|	CNDP2	|CNDP2|55748|Q96KP4|cytosolic non-specific dipeptidase isoform 1 [Homo sapiens]	KKPCITYGLR	KKPC[+418.1]ITYGLR	KKPC#ITYGLR	532.939	3	C205	55.22	134442720	-0.288758	BTD
NP_003741.1|	EIF3A	|EIF3A|8661|Q14152|eukaryotic translation initiation factor 3 subunit A [Homo sapiens]	KLCDNLR	KLC[+418.1]DNLR	KLC#DNLR	640.3	2	C198	55.41	620097760	-0.0587215	BTD
NP_000966.2|	RPL11	|RPL11|6135|P62913;Q5VVD0|60S ribosomal protein L11 isoform 1 [Homo sapiens]	KLCLNICVGESGDR	KLC[+418.1]LNIC[+57]VGESGDR	KLC#LNICVGESGDR	661.302	3	C21	67.32	300531776	-0.210088	BTD
NP_055426.1|	MDN1	|MDN1|23195|Q9NU22|midasin [Homo sapiens]	KLCPQSLFSK	KLC[+418.1]PQSLFSK	KLC#PQSLFSK	523.592	3	C1332	66.46	126912400	-0.292325	BTD
NP_002464.1|	MYH9	|MYH9|4627|P35579;Q60FE2|myosin-9 [Homo sapiens]	KLEEEQIILEDQNCK	KLEEEQIILEDQNC[+418.1]K	KLEEEQIILEDQNC#K	1125.52	2	C988	61.8	555418048	-0.0893578	BTD
NP_002464.1|	MYH9	|MYH9|4627|P35579;Q60FE2|myosin-9 [Homo sapiens]	KLEEEQIILEDQNCK	KLEEEQIILEDQNC[+418.1]K	KLEEEQIILEDQNC#K	750.685	3	C988	61.8	3570222208	1.33864	BTD
NP_056655.2|	ADAR	|ADAR|103|P55265|double-stranded RNA-specific adenosine deaminase isoform b [Homo sapiens]	KLTECQLK	KLTEC[+418.1]QLK	KLTEC#QLK	690.836	2	C499	52.75	71688562	-0.318482	BTD
NP_055181.3|	GNL3	|GNL3|26354|Q9BVP2|guanine nucleotide-binding protein-like 3 isoform 1 [Homo sapiens]	KLYCQELK	KLYC[+418.1]QELK	KLYC#QELK	481.565	3	C131	56.18	652843936	-0.0432108	BTD
NP_004492.2|	HNRNPU	|HNRNPU|3192|Q00839|heterogeneous nuclear ribonucleoprotein U isoform b [Homo sapiens]	KMCLFAGFQR	KM[+16]C[+418.1]LFAGFQR	KMC#LFAGFQR	545.581	3	C575	70.68	76295480	-0.3163	BTD
NP_002464.1|	MYH9	|MYH9|4627|P35579;Q60FE2|myosin-9 [Homo sapiens]	KMEDSVGCLETAEEVKR	KM[+16]EDSVGC[+418.1]LETAEEVKR	KMEDSVGC#LETAEEVKR	786.685	3	C1379	55.66	146190104	-0.283194	BTD
NP_002464.1|	MYH9	|MYH9|4627|P35579;Q60FE2|myosin-9 [Homo sapiens]	KMEDSVGCLETAEEVKR	KM[+16]EDSVGC[+418.1]LETAEEVKR	KMEDSVGC#LETAEEVKR	590.266	4	C1379	55.66	254844192	-0.231728	BTD
NP_006799.1|	SEC61B	|SEC61B|10952|P60468|protein transport protein Sec61 subunit beta [Homo sapiens]	KNASCGTR	KNASC[+418.1]GTR	KNASC#GTR	627.771	2	C39	34.37	1074958848	0.156729	BTD
NP_006799.1|	SEC61B	|SEC61B|10952|P60468|protein transport protein Sec61 subunit beta [Homo sapiens]	KNASCGTR	KNASC[+418.1]GTR	KNASC#GTR	418.85	3	C39	34.37	2399362560	0.78405	BTD
NP_004631.1|	DDX39B	|DDX39B|7919|Q13838|spliceosome RNA helicase DDX39B [Homo sapiens]	KNCPHIVVGTPGR	KNC[+418.1]PHIVVGTPGR	KNC#PHIVVGTPGR	599.296	3	C165	51.47	297492384	-0.211528	BTD
NP_005795.2|	DDX39A	|DDX39A|10212|O00148|ATP-dependent RNA helicase DDX39A [Homo sapiens]	KNCPHVVVGTPGR	KNC[+418.1]PHVVVGTPGR	KNC#PHVVVGTPGR	594.624	3	C164	48.35	682256784	-0.0292791	BTD
NP_008835.5|	PRKDC	|PRKDC|5591|P78527|DNA-dependent protein kinase catalytic subunit isoform 1 [Homo sapiens]	KNILEESLCELVAK	KNILEESLC[+418.1]ELVAK	KNILEESLC#ELVAK	1004	2	C2342	86.84	29335372	-0.338543	BTD
NP_008835.5|	PRKDC	|PRKDC|5591|P78527|DNA-dependent protein kinase catalytic subunit isoform 1 [Homo sapiens]	KNILEESLCELVAK	KNILEESLC[+418.1]ELVAK	KNILEESLC#ELVAK	669.669	3	C2342	86.84	255778448	-0.231286	BTD
NP_001646.2|	ARCN1	|ARCN1|372|P48444;B0YIW5|coatomer subunit delta isoform 1 [Homo sapiens]	KNYCNIQVTK	KNYC[+418.1]NIQVTK	KNYC#NIQVTK	543.59	3	C479	54.64	108789816	-0.300909	BTD
NP_001269.3|	CHUK	|CHUK|1147|O15111|inhibitor of nuclear factor kappa-B kinase subunit alpha [Homo sapiens]	KPASQCVLDGVR	KPASQC[+418.1]VLDGVR	KPASQC#VLDGVR	845.906	2	C371	61.85	213572112	-0.251277	BTD
NP_001269.3|	CHUK	|CHUK|1147|O15111|inhibitor of nuclear factor kappa-B kinase subunit alpha [Homo sapiens]	KPASQCVLDGVR	KPASQC[+418.1]VLDGVR	KPASQC#VLDGVR	564.273	3	C371	61.85	288913088	-0.215591	BTD
NP_055844.2|	POP1	|POP1|10940|Q99575;Q96F88|ribonucleases P/MRP protein subunit POP1 [Homo sapiens]	KPDSVSLHCR	KPDSVSLHC[+418.1]R	KPDSVSLHC#R	520.575	3	C481	47.47	645828896	-0.0465336	BTD
NP_079139.4|	TCEAL4	|TCEAL4|79921|Q96EI5|transcription elongation factor A protein-like 4 [Homo sapiens]	KPEVTCTLEDK	KPEVTC[+418.1]TLEDK	KPEVTC#TLEDK	560.925	3	C34	54.29	160308632	-0.276506	BTD
NP_060697.4|	UBA6	|UBA6|55236|A0AVT1|ubiquitin-like modifier-activating enzyme 6 [Homo sapiens]	KPNVGCQQDSEELLK	KPNVGC[+418.1]QQDSEELLK	KPNVGC#QQDSEELLK	702.659	3	C347	56.38	863624256	0.0566279	BTD
NP_055970.1|	LARP4B	|LARP4B|23185|Q92615|la-related protein 4B [Homo sapiens]	KPSYAEICQR	KPSYAEIC[+418.1]QR	KPSYAEIC#QR	538.246	3	C654	54.81	291852208	-0.214199	BTD
NP_002473.2|	NASP	|NASP|4678|P49321|nuclear autoantigenic sperm protein isoform 2 [Homo sapiens]	KPTDGASSSNCVTDISHLVR	KPTDGASSSNC[+418.1]VTDISHLVR	KPTDGASSSNC#VTDISHLVR	835.721	3	C708	69.49	1318238528	0.271962	BTD
NP_002473.2|	NASP	|NASP|4678|P49321|nuclear autoantigenic sperm protein isoform 2 [Homo sapiens]	KPTDGASSSNCVTDISHLVR	KPTDGASSSNC[+418.1]VTDISHLVR	KPTDGASSSNC#VTDISHLVR	627.043	4	C708	69.49	2115083264	0.649397	BTD
NP_055950.1|	NUP205	|NUP205|23165|Q92621|nuclear pore complex protein Nup205 [Homo sapiens]	KPVSTTNLQDPGVLGCPR	KPVSTTNLQDPGVLGC[+418.1]PR	KPVSTTNLQDPGVLGC#PR	767.377	3	C1028	63.8	1341219840	0.282847	BTD
NP_002464.1|	MYH9	|MYH9|4627|P35579;Q60FE2|myosin-9 [Homo sapiens]	KQELEEICHDLEAR	KQELEEIC[+418.1]HDLEAR	KQELEEIC#HDLEAR	710.991	3	C917	67.45	538410272	-0.0974138	BTD
NP_002464.1|	MYH9	|MYH9|4627|P35579;Q60FE2|myosin-9 [Homo sapiens]	KQELEEICHDLEAR	KQELEEIC[+418.1]HDLEAR	KQELEEIC#HDLEAR	533.495	4	C917	67.45	171191592	-0.271351	BTD
NP_056130.2|	LARP1	|LARP1|23367|Q6PKG0|la-related protein 1 isoform 1 [Homo sapiens]	KRCPSQSSSR	KRC[+418.1]PSQSSSR	KRC#PSQSSSR	518.57	3	C977	31.18	244577536	-0.236591	BTD
NP_004485.1|	HDGF	|HDGF|3068|P51858|hepatoma-derived growth factor isoform a [Homo sapiens]	KSCVEEPEPEPEAAEGDGDKK	KSC[+418.1]VEEPEPEPEAAEGDGDKK	KSC#VEEPEPEPEAAEGDGDKK	888.048	3	C108	46.88	235234112	-0.241017	BTD
NP_004485.1|	HDGF	|HDGF|3068|P51858|hepatoma-derived growth factor isoform a [Homo sapiens]	KSCVEEPEPEPEAAEGDGDKK	KSC[+418.1]VEEPEPEPEAAEGDGDKK	KSC#VEEPEPEPEAAEGDGDKK	666.288	4	C108	46.88	518731232	-0.106735	BTD
NP_116294.1|	RBM17	|RBM17|84991|Q96I25;Q5W009|splicing factor 45 [Homo sapiens]	KSDSNPLTEILKCPTK	KSDSNPLTEILKC[+418.1]PTK	KSDSNPLTEILKC#PTK	731.362	3	C302	72.2	145158248	-0.283682	BTD
NP_001014.1|	RPS20	|RPS20|6224|P60866|40S ribosomal protein S20 isoform 2 [Homo sapiens]	KTPCGEGSK	KTPC[+418.1]GEGSK	KTPC#GEGSK	662.787	2	C70	40.12	3163697920	1.14609	BTD
NP_001014.1|	RPS20	|RPS20|6224|P60866|40S ribosomal protein S20 isoform 2 [Homo sapiens]	KTPCGEGSK	KTPC[+418.1]GEGSK	KTPC#GEGSK	442.194	3	C70	40.12	2350293760	0.760807	BTD
NP_002708.1|	PPP2R2A	|PPP2R2A|5520|P63151|serine/threonine-protein phosphatase 2A 55 kDa regulatory subunit B alpha isoform isoform 1 [Homo sapiens]	KVCASGK	KVC[+418.1]ASGK	KVC#ASGK	555.757	2	C398	39.47	386858736	-0.169198	BTD
NP_002708.1|	PPP2R2A	|PPP2R2A|5520|P63151|serine/threonine-protein phosphatase 2A 55 kDa regulatory subunit B alpha isoform isoform 1 [Homo sapiens]	KVCASGK	KVC[+418.1]ASGK	KVC#ASGK	370.841	3	C398	39.47	359426528	-0.182192	BTD
NP_001009186.1|	CCT6A	|CCT6A|908|A6NCD2|T-complex protein 1 subunit zeta isoform b [Homo sapiens]	KVCGDSDK	KVC[+418.1]GDSDK	KVC#GDSDK	635.266	2	C237	40.08	49650260	-0.328921	BTD
NP_001609.2|	PARP1	|PARP1|142|P09874|poly [ADP-ribose] polymerase 1 [Homo sapiens]	KVCSTNDLK	KVC[+418.1]STNDLK	KVC#STNDLK	713.329	2	C256	47.64	154701088	-0.279162	BTD
NP_003303.2|	TST	|TST|7263|Q16762|thiosulfate sulfurtransferase [Homo sapiens]	KVDLSQPLIATCR	KVDLSQPLIATC[+418.1]R	KVDLSQPLIATC#R	931.469	2	C248	68.6	1088289792	0.163044	BTD
NP_003303.2|	TST	|TST|7263|Q16762|thiosulfate sulfurtransferase [Homo sapiens]	KVDLSQPLIATCR	KVDLSQPLIATC[+418.1]R	KVDLSQPLIATC#R	621.315	3	C248	68.6	5283385344	2.1501	BTD
NP_003303.2|	TST	|TST|7263|Q16762|thiosulfate sulfurtransferase [Homo sapiens]	KVDLSQPLIATCR	KVDLSQPLIATC[+418.1]R	KVDLSQPLIATC#R	466.238	4	C248	68.6	88646088	-0.31045	BTD
NP_665735.1|	MGST1	|MGST1|4257|P10620|microsomal glutathione S-transferase 1 isoform a [Homo sapiens]	KVFANPEDCVAFGK	KVFANPEDC[+418.1]VAFGK	KVFANPEDC#VAFGK	971.945	2	C50	65.64	463441632	-0.132924	BTD
NP_665735.1|	MGST1	|MGST1|4257|P10620|microsomal glutathione S-transferase 1 isoform a [Homo sapiens]	KVFANPEDCVAFGK	KVFANPEDC[+418.1]VAFGK	KVFANPEDC#VAFGK	648.299	3	C50	65.64	2007524480	0.598451	BTD
NP_002444.2|	MTIF2	|MTIF2|4528|P46199;Q6P1N2|translation initiation factor IF-2, mitochondrial precursor [Homo sapiens]	KVPVAGCR	KVPVAGC[+418.1]R	KVPVAGC#R	416.539	3	C646	49.06	81169480	-0.313992	BTD
NP_001093869.1|	PDS5A	|PDS5A|23244|Q29RF7;G1UI16|sister chromatid cohesion protein PDS5 homolog A isoform 1 [Homo sapiens]	KYCLHGEAGK	KYC[+418.1]LHGEAGK	KYC#LHGEAGK	508.564	3	C430	45.36	199451912	-0.257966	BTD
NP_001093162.1|	EIF5AL1	|EIF5AL1|143244|Q6IS14|eukaryotic translation initiation factor 5A-1-like [Homo sapiens]	KYEDICPSTHNMDVPNIK	KYEDIC[+418.1]PSTHNM[+16]DVPNIK	KYEDIC#PSTHNMDVPNIK	846.708	3	C73	57.14	566043264	-0.084325	BTD
NP_001093162.1|	EIF5AL1	|EIF5AL1|143244|Q6IS14|eukaryotic translation initiation factor 5A-1-like [Homo sapiens]	KYEDICPSTHNMDVPNIK	KYEDIC[+418.1]PSTHNM[+16]DVPNIK	KYEDIC#PSTHNMDVPNIK	635.283	4	C73	57.14	889708928	0.0689832	BTD
NP_001348.2|	DHX9	|DHX9|1660|Q08211;B3KU66|ATP-dependent RNA helicase A [Homo sapiens]	LAAQSCALSLVR	LAAQSC[+418.1]ALSLVR	LAAQSC#ALSLVR	825.411	2	C242	74.71	2365505024	0.768012	BTD
NP_008835.5|	PRKDC	|PRKDC|5591|P78527|DNA-dependent protein kinase catalytic subunit isoform 1 [Homo sapiens]	LAAVVSACK	LAAVVSAC[+418.1]K	LAAVVSAC#K	640.312	2	C1455	61.34	245720816	-0.23605	BTD
NP_004850.1|	CLTC	|CLTC|1213|Q00610|clathrin heavy chain 1 [Homo sapiens]	LAELEEFINGPNNAHIQQVGDRCYDEK	LAELEEFINGPNNAHIQQVGDRC[+418.1]YDEK	LAELEEFINGPNNAHIQQVGDRC#YDEK	880.903	4	C1205	69.62	434845552	-0.146468	BTD
NP_008835.5|	PRKDC	|PRKDC|5591|P78527|DNA-dependent protein kinase catalytic subunit isoform 1 [Homo sapiens]	LAGANPAVITCDELLLGHEK	LAGANPAVITC[+418.1]DELLLGHEK	LAGANPAVITC#DELLLGHEK	828.075	3	C4061	77.96	1230058880	0.230194	BTD
NP_008835.5|	PRKDC	|PRKDC|5591|P78527|DNA-dependent protein kinase catalytic subunit isoform 1 [Homo sapiens]	LAGANPAVITCDELLLGHEK	LAGANPAVITC[+418.1]DELLLGHEK	LAGANPAVITC#DELLLGHEK	621.308	4	C4061	77.96	122728496	-0.294307	BTD
NP_056450.2|	GAPVD1	|GAPVD1|26130|Q14C86;B3KN67|GTPase-activating protein and VPS9 domain-containing protein 1 [Homo sapiens]	LALCSADSVAFPVLTHSTR	LALC[+418.1]SADSVAFPVLTHSTR	LALC#SADSVAFPVLTHSTR	802.724	3	C1138	80.02	123812984	-0.293793	BTD
NP_004740.2|	TBRG4	|TBRG4|9238|Q969Z0|protein TBRG4 isoform 1 [Homo sapiens]	LATDLLSLMPSLTSGEVAHCAK	LATDLLSLM[+16]PSLTSGEVAHC[+418.1]AK	LATDLLSLMPSLTSGEVAHC#AK	897.766	3	C335	75.64	145509520	-0.283516	BTD
NP_001367.2|	DYNC1H1	|DYNC1H1|1778|Q14204|cytoplasmic dynein 1 heavy chain 1 [Homo sapiens]	LCDEQLSSQSHYDFGLR	LC[+418.1]DEQLSSQSHYDFGLR	LC#DEQLSSQSHYDFGLR	806.016	3	C2076	67.4	101034796	-0.304582	BTD
NP_005817.1|	HNRNPR	|HNRNPR|10236|O43390|heterogeneous nuclear ribonucleoprotein R isoform 2 [Homo sapiens]	LCDSYEIRPGK	LC[+418.1]DSYEIRPGK	LC#DSYEIRPGK	566.925	3	C226	56.32	390211168	-0.16761	BTD
NP_612510.1|	TECR	|TECR|9524|Q9NZ01|trans-2,3-enoyl-CoA reductase [Homo sapiens]	LCFLDKVEPHATIAEIK	LC[+418.1]FLDKVEPHATIAEIK	LC#FLDKVEPHATIAEIK	782.394	3	C18	79.84	53542546	-0.327077	BTD
NP_612510.1|	TECR	|TECR|9524|Q9NZ01|trans-2,3-enoyl-CoA reductase [Homo sapiens]	LCFLDKVEPHATIAEIK	LC[+418.1]FLDKVEPHATIAEIK	LC#FLDKVEPHATIAEIK	587.047	4	C18	79.84	84467084	-0.31243	BTD
NP_001166935.1|	KIF21A	|KIF21A|55605|Q7Z4S6|kinesin-like protein KIF21A isoform 1 [Homo sapiens]	LCGEVKPK	LC[+418.1]GEVKPK	LC#GEVKPK	431.211	3	C1144	48.11	200174784	-0.257623	BTD
NP_116145.1|	HPDL	|HPDL|84842|Q96IR7|4-hydroxyphenylpyruvate dioxygenase-like protein [Homo sapiens]	LCHIAFHVPAGQPLAR	LC[+418.1]HIAFHVPAGQPLAR	LC#HIAFHVPAGQPLAR	537.771	4	C9	66.92	139831808	-0.286205	BTD
NP_009096.2|	SF3A2	|SF3A2|8175|Q15428;Q05DF2|splicing factor 3A subunit 2 [Homo sapiens]	LCLTLHNNEGSYLAHTQGK	LC[+418.1]LTLHNNEGSYLAHTQGK	LC#LTLHNNEGSYLAHTQGK	630.047	4	C59	62.72	330468272	-0.195908	BTD
NP_001177966.1|	PSMD1	|PSMD1|5707|Q99460|26S proteasome non-ATPase regulatory subunit 1 isoform 2 [Homo sapiens]	LCMSLMQNK	LC[+418.1]M[+16]SLM[+16]QNK	LC#MSLMQNK	759.316	2	C184	55.38	122973200	-0.294191	BTD
NP_005307.1|	GTF2H1	|GTF2H1|2965|P32780|general transcription factor IIH subunit 1 [Homo sapiens]	LCPFQEK	LC[+418.1]PFQEK	LC#PFQEK	641.783	2	C506	66.16	514116800	-0.108921	BTD
NP_004716.1|	BUB3	|BUB3|9184|O43684|mitotic checkpoint protein BUB3 isoform a [Homo sapiens]	LCQFHR	LC[+418.1]QFHR	LC#QFHR	407.848	3	C270	54.31	949834528	0.0974625	BTD
NP_001896.2|	CTPS1	|CTPS1|1503|P17812|CTP synthase 1 [Homo sapiens]	LCSAHGVLVPGGFGVR	LC[+418.1]SAHGVLVPGGFGVR	LC#SAHGVLVPGGFGVR	662.994	3	C362	70.33	555015856	-0.0895483	BTD
NP_055157.1|	MTCH2	|MTCH2|23788|Q9Y6C9|mitochondrial carrier homolog 2 [Homo sapiens]	LCSGVLGTVVHGK	LC[+418.1]SGVLGTVVHGK	LC#SGVLGTVVHGK	563.281	3	C79	66.33	672082928	-0.034098	BTD
NP_001181885.1|	MATR3	|MATR3|9782|P43243|matrin-3 isoform b [Homo sapiens]	LCSLFYTNEEVAK	LC[+418.1]SLFYTNEEVAK	LC#SLFYTNEEVAK	967.937	2	C518	75.88	107277712	-0.301625	BTD
NP_001181885.1|	MATR3	|MATR3|9782|P43243|matrin-3 isoform b [Homo sapiens]	LCSLFYTNEEVAK	LC[+418.1]SLFYTNEEVAK	LC#SLFYTNEEVAK	645.627	3	C518	75.88	43202456	-0.331975	BTD
NP_001605.1|	ACTG1	|ACTG1|71|P63261|actin, cytoplasmic 2 [Homo sapiens]	LCYVALDFEQEMATAASSSSLEK	LC[+418.1]YVALDFEQEM[+16]ATAASSSSLEK	LC#YVALDFEQEMATAASSSSLEK	976.431	3	C217	83.81	99450680	-0.305332	BTD
NP_061184.1|	COG1	|COG1|9382|Q8WTW3|conserved oligomeric Golgi complex subunit 1 [Homo sapiens]	LCQSLGELCPHLK	LC[+57]QSLGELC[+418.1]PHLK	LCQSLGELC#PHLK	639.3	3	C625	71.21	630434896	-0.0538251	BTD
NP_001106676.1|	TSTD1	|TSTD1|100131187|Q8NFU3|thiosulfate sulfurtransferase/rhodanese-like domain-containing protein 1 isoform 3 [Homo sapiens]	LEDEHLVFFCQMGK	LEDEHLVFFC[+418.1]QM[+16]GK	LEDEHLVFFC#QMGK	1065.46	2	C79	72.6	153543696	-0.279711	BTD
NP_001106676.1|	TSTD1	|TSTD1|100131187|Q8NFU3|thiosulfate sulfurtransferase/rhodanese-like domain-containing protein 1 isoform 3 [Homo sapiens]	LEDEHLVFFCQMGK	LEDEHLVFFC[+418.1]QM[+16]GK	LEDEHLVFFC#QMGK	710.642	3	C79	72.6	1513950848	0.364663	BTD
NP_002464.1|	MYH9	|MYH9|4627|P35579;Q60FE2|myosin-9 [Homo sapiens]	LEEEQIILEDQNCK	LEEEQIILEDQNC[+418.1]K	LEEEQIILEDQNC#K	1061.48	2	C988	66.94	100042160	-0.305052	BTD
NP_036222.3|	MACF1	|MACF1|23499|Q9UPN3;Q6ZSD7|microtubule-actin cross-linking factor 1 isoform a [Homo sapiens]	LEGIGQFHCR	LEGIGQFHC[+418.1]R	LEGIGQFHC#R	789.353	2	C3064	62.49	189171016	-0.262835	BTD
NP_036222.3|	MACF1	|MACF1|23499|Q9UPN3;Q6ZSD7|microtubule-actin cross-linking factor 1 isoform a [Homo sapiens]	LEGIGQFHCR	LEGIGQFHC[+418.1]R	LEGIGQFHC#R	526.571	3	C3064	62.49	239932056	-0.238792	BTD
NP_775083.1|	CAST	|CAST|831|G5E946;Q86YM9|calpastatin isoform b [Homo sapiens]	LEKCGEDDETIPSEYR	LEKC[+418.1]GEDDETIPSEYR	LEKC#GEDDETIPSEYR	767.993	3	C306	55.32	171386008	-0.271259	BTD
NP_002085.2|	GSPT1	|GSPT1|2935|P15170;Q7KZX8|eukaryotic peptide chain release factor GTP-binding subunit ERF3A isoform 1 [Homo sapiens]	LESGSICK	LESGSIC[+418.1]K	LESGSIC#K	627.778	2	C465	57.68	242811728	-0.237428	BTD
NP_037431.3|	SAC3D1	|SAC3D1|29901|F8WC89|SAC3 domain-containing protein 1 [Homo sapiens]	LEVVPGCR	LEVVPGC[+418.1]R	LEVVPGC#R	645.802	2	C38	65.91	145565592	-0.28349	BTD
NP_000997.1|	RPS3A	|RPS3A|6189|P61247|40S ribosomal protein S3a isoform 1 [Homo sapiens]	LFCVGFTK	LFC[+418.1]VGFTK	LFC#VGFTK	666.809	2	C139	77.95	311696240	-0.2048	BTD
NP_055718.4|	NAV3	|NAV3|89795|Q8IVL0|neuron navigator 3 [Homo sapiens]	LFLPCPMDVEGSR	LFLPC[+418.1]PM[+16]DVEGSR	LFLPC#PMDVEGSR	949.418	2	C2224	81.36	94118196	-0.307858	BTD
NP_055718.4|	NAV3	|NAV3|89795|Q8IVL0|neuron navigator 3 [Homo sapiens]	LFLPCPMDVEGSR	LFLPC[+418.1]PM[+16]DVEGSR	LFLPC#PMDVEGSR	633.281	3	C2224	81.36	92888664	-0.308441	BTD
NP_066964.1|	XRCC5	|XRCC5|7520|P13010|X-ray repair cross-complementing protein 5 [Homo sapiens]	LFQCLLHR	LFQC[+418.1]LLHR	LFQC#LLHR	724.352	2	C493	73.49	779804672	0.0169257	BTD
NP_066964.1|	XRCC5	|XRCC5|7520|P13010|X-ray repair cross-complementing protein 5 [Homo sapiens]	LFQCLLHR	LFQC[+418.1]LLHR	LFQC#LLHR	483.237	3	C493	73.49	771452960	0.0129698	BTD
NP_112553.1|	HNRNPK	|HNRNPK|3190|P61978;Q6IBN1|heterogeneous nuclear ribonucleoprotein K isoform a [Homo sapiens]	LFQECCPHSTDR	LFQEC[+418.1]C[+57]PHSTDR	LFQEC#CPHSTDR	955.885	2	C184	55.34	130577128	-0.290589	BTD
NP_112553.1|	HNRNPK	|HNRNPK|3190|P61978;Q6IBN1|heterogeneous nuclear ribonucleoprotein K isoform a [Homo sapiens]	LFQECCPHSTDR	LFQEC[+57]C[+418.1]PHSTDR	LFQECC#PHSTDR	955.885	2	C185	55.35	130865104	-0.290453	BTD
NP_112553.1|	HNRNPK	|HNRNPK|3190|P61978;Q6IBN1|heterogeneous nuclear ribonucleoprotein K isoform a [Homo sapiens]	LFQECCPHSTDR	LFQEC[+57]C[+418.1]PHSTDR	LFQECC#PHSTDR	637.592	3	C185	55.35	1116783072	0.17654	BTD
NP_073576.1|	SMURF2	|SMURF2|64750|Q9HAU4;Q96DE7|E3 ubiquitin-protein ligase SMURF2 [Homo sapiens]	LFTIHQIDACTNNLPK	LFTIHQIDAC[+418.1]TNNLPK	LFTIHQIDAC#TNNLPK	749.363	3	C706	74.16	271957008	-0.223623	BTD
NP_005905.2|	MCM4	|MCM4|4173|P33991;B4DLA6|DNA replication licensing factor MCM4 [Homo sapiens]	LGEINVIGEPFLNVNCEHIK	LGEINVIGEPFLNVNC[+418.1]EHIK	LGEINVIGEPFLNVNC#EHIK	886.101	3	C212	80.57	199704864	-0.257846	BTD
NP_001007.2|	RPS12	|RPS12|6206|P25398|40S ribosomal protein S12 [Homo sapiens]	LGEWVGLCK	LGEWVGLC[+418.1]K	LGEWVGLC#K	711.831	2	C92	76.85	106056824	-0.302203	BTD
NP_055718.4|	NAV3	|NAV3|89795|Q8IVL0|neuron navigator 3 [Homo sapiens]	LGQACPR	LGQAC[+418.1]PR	LGQAC#PR	581.76	2	C748	52.73	132067772	-0.289883	BTD
NP_003671.1|	YARS	|YARS|8565|P54577|tyrosine--tRNA ligase, cytoplasmic [Homo sapiens]	LGSISCK	LGSISC[+418.1]K	LGSISC#K	563.257	2	C519	57.45	659027712	-0.0402818	BTD
NP_056107.1|	ESYT1	|ESYT1|23344|Q9BSJ8|extended synaptotagmin-1 isoform 2 [Homo sapiens]	LGTQTFCSR	LGTQTFC[+418.1]SR	LGTQTFC#SR	715.813	2	C370	62.51	384352064	-0.170385	BTD
NP_004719.2|	DDX21	|DDX21|9188|Q9NR30|nucleolar RNA helicase 2 isoform 1 [Homo sapiens]	LGVCFDVPTASVTEIQEK	LGVC[+418.1]FDVPTASVTEIQEK	LGVC#FDVPTASVTEIQEK	785.373	3	C682	80.77	57620502	-0.325146	BTD
NP_004437.2|	EPRS	|EPRS|2058|P07814|bifunctional glutamate/proline--tRNA ligase [Homo sapiens]	LGVENCYFPMFVSQSALEK	LGVENC[+418.1]YFPM[+16]FVSQSALEK	LGVENC#YFPMFVSQSALEK	866.057	3	C1076	84.53	73841258	-0.317463	BTD
NP_002564.1|	PAFAH1B3	|PAFAH1B3|5050|Q15102|platelet-activating factor acetylhydrolase IB subunit gamma [Homo sapiens]	LGYTPVCR	LGYTPVC[+418.1]R	LGYTPVC#R	663.802	2	C205	64.18	1300573120	0.263594	BTD
NP_001367.2|	DYNC1H1	|DYNC1H1|1778|Q14204|cytoplasmic dynein 1 heavy chain 1 [Homo sapiens]	LHSLQPHACFR	LHSLQPHAC[+418.1]FR	LHSLQPHAC#FR	576.27	3	C4121	54.51	410961680	-0.157781	BTD
NP_001367.2|	DYNC1H1	|DYNC1H1|1778|Q14204|cytoplasmic dynein 1 heavy chain 1 [Homo sapiens]	LHSLQPHACFR	LHSLQPHAC[+418.1]FR	LHSLQPHAC#FR	432.454	4	C4121	54.51	322782640	-0.199548	BTD
NP_000364.1|	UMPS	|UMPS|7372|P11172;A8K5J1|uridine 5'-monophosphate synthase [Homo sapiens]	LHSVCTLSK	LHSVC[+418.1]TLSK	LHSVC#TLSK	703.334	2	C174	55.07	603325792	-0.0666657	BTD
NP_000364.1|	UMPS	|UMPS|7372|P11172;A8K5J1|uridine 5'-monophosphate synthase [Homo sapiens]	LHSVCTLSK	LHSVC[+418.1]TLSK	LHSVC#TLSK	469.225	3	C174	55.07	1382891520	0.302585	BTD
NP_065801.1|	XPO5	|XPO5|57510|Q9HAV4|exportin-5 [Homo sapiens]	LIAGCIGKPLGEQFR	LIAGC[+418.1]IGKPLGEQFR	LIAGC#IGKPLGEQFR	674.01	3	C1157	70.85	234924224	-0.241164	BTD
NP_002881.1|	RASA1	|RASA1|5921|P20936;Q59GK3|ras GTPase-activating protein 1 isoform 1 [Homo sapiens]	LICPAILNPR	LIC[+418.1]PAILNPR	LIC#PAILNPR	764.394	2	C906	78.4	155302032	-0.278878	BTD
NP_006752.1|	YWHAE	|YWHAE|7531|P62258|14-3-3 protein epsilon [Homo sapiens]	LICCDILDVLDK	LIC[+57]C[+418.1]DILDVLDK	LICC#DILDVLDK	919.43	2	C98	90.78	145244280	-0.283642	BTD
NP_001035828.1|	TROVE2	|TROVE2|6738|P10155;Q5LJA0|60 kDa SS-A/Ro ribonucleoprotein isoform 1 [Homo sapiens]	LIEDGRGCEVIQEIK	LIEDGRGC[+418.1]EVIQEIK	LIEDGRGC#EVIQEIK	707.343	3	C71	67.26	318506112	-0.201574	BTD
NP_003850.1|	DPM1	|DPM1|8813|O60762|dolichol-phosphate mannosyltransferase [Homo sapiens]	LIEKCVSK	LIEKC[+418.1]VSK	LIEKC#VSK	446.558	3	C202	49.88	767350912	0.0110268	BTD
NP_001153706.1|	ATP1A1	|ATP1A1|476|P05023;B7Z3U6|sodium/potassium-transporting ATPase subunit alpha-1 isoform d [Homo sapiens]	LIIVEGCQR	LIIVEGC[+418.1]QR	LIIVEGC#QR	724.855	2	C674	66.86	280656864	-0.219502	BTD
NP_006004.2|	RPL10	|RPL10|6134|P27635|60S ribosomal protein L10 isoform a [Homo sapiens]	LIPDGCGVK	LIPDGC[+418.1]GVK	LIPDGC#GVK	660.31	2	C195	63.16	1546166208	0.379922	BTD
NP_071896.8|	NOC3L	|NOC3L|64318|Q8WTT2|nucleolar complex protein 3 homolog [Homo sapiens]	LISEMCCEAVKK	LISEM[+16]C[+57]C[+418.1]EAVKK	LISEMCC#EAVKK	615.607	3	C382	51.41	276705760	-0.221373	BTD
NP_002026.1|	KDSR	|KDSR|2531|Q06136|3-ketodihydrosphingosine reductase precursor [Homo sapiens]	LISETTSVCKPEQVAK	LISETTSVC[+418.1]KPEQVAK	LISETTSVC#KPEQVAK	717.687	3	C245	56.28	459077984	-0.13499	BTD
NP_036222.3|	MACF1	|MACF1|23499|Q9UPN3;Q6ZSD7|microtubule-actin cross-linking factor 1 isoform a [Homo sapiens]	LKDCMQK	LKDC[+418.1]M[+16]QK	LKDC#MQK	433.856	3	C2839	40.3	242972256	-0.237352	BTD
NP_001177645.1|	DNM2	|DNM2|1785|P50570|dynamin-2 isoform 5 [Homo sapiens]	LKEPCLK	LKEPC[+418.1]LK	LKEPC#LK	416.875	3	C424	54.4	137277464	-0.287415	BTD
NP_003343.1|	SUMO1	|SUMO1|7341|P63165|small ubiquitin-related modifier 1 isoform a precursor [Homo sapiens]	LKESYCQR	LKESYC[+418.1]QR	LKESYC#QR	722.821	2	C52	48.15	122373772	-0.294475	BTD
NP_004614.3|	TTC4	|TTC4|7268|O95801|tetratricopeptide repeat protein 4 [Homo sapiens]	LKPCHLK	LKPC[+418.1]HLK	LKPC#HLK	628.818	2	C149	45.26	196621736	-0.259306	BTD
NP_004614.3|	TTC4	|TTC4|7268|O95801|tetratricopeptide repeat protein 4 [Homo sapiens]	LKPCHLK	LKPC[+418.1]HLK	LKPC#HLK	419.547	3	C149	45.26	668826720	-0.0356404	BTD
NP_001011708.1|	OLA1	|OLA1|29789|Q9NTK5|obg-like ATPase 1 isoform 2 [Homo sapiens]	LKPEYDIMCK	LKPEYDIM[+16]C[+418.1]K	LKPEYDIMC#K	837.372	2	C29	56.57	118075196	-0.296511	BTD
NP_001011708.1|	OLA1	|OLA1|29789|Q9NTK5|obg-like ATPase 1 isoform 2 [Homo sapiens]	LKPEYDIMCK	LKPEYDIM[+16]C[+418.1]K	LKPEYDIMC#K	558.584	3	C29	56.57	548883040	-0.0924532	BTD
NP_006280.3|	TLN1	|TLN1|7094|Q9Y490|talin-1 [Homo sapiens]	LKPLPGETMEKCTQDLGNSTK	LKPLPGETM[+16]EKC[+418.1]TQDLGNSTK	LKPLPGETMEKC#TQDLGNSTK	908.761	3	C1087	52.02	147884912	-0.282391	BTD
NP_006280.3|	TLN1	|TLN1|7094|Q9Y490|talin-1 [Homo sapiens]	LKPLPGETMEKCTQDLGNSTK	LKPLPGETM[+16]EKC[+418.1]TQDLGNSTK	LKPLPGETMEKC#TQDLGNSTK	681.822	4	C1087	52.02	532657184	-0.100139	BTD
NP_005471.3|	TROAP	|TROAP|10024|Q12815|tastin isoform 1 [Homo sapiens]	LKSCLTAIHCFHEAR	LKSC[+418.1]LTAIHC[+57]FHEAR	LKSC#LTAIHCFHEAR	735.345	3	C718	32.79	6401187328	2.67956	BTD
NP_001003.1|	RPS8	|RPS8|6202|P62241;Q5JR94|40S ribosomal protein S8 [Homo sapiens]	LLACIASR	LLAC[+418.1]IASR	LLAC#IASR	632.812	2	C174	69.53	394375824	-0.165637	BTD
NP_002406.1|	MIF	|MIF|4282|P14174|macrophage migration inhibitory factor [Homo sapiens]	LLCGLLAER	LLC[+418.1]GLLAER	LLC#GLLAER	703.352	2	C81	80.32	1029145600	0.135029	BTD
NP_683877.1|	PSMA1	|PSMA1|5682|P25786|proteasome subunit alpha type-1 isoform 1 [Homo sapiens]	LLCNFMR	LLC[+418.1]NFM[+16]R	LLC#NFMR	665.791	2	C91	69.04	419691472	-0.153646	BTD
NP_001003796.1|	NHP2L1	|NHP2L1|4809|P55769;Q6FHM6|NHP2-like protein 1 [Homo sapiens]	LLDLVQQSCNYK	LLDLVQQSC[+418.1]NYK	LLDLVQQSC#NYK	921.432	2	C30	74.52	106055988	-0.302204	BTD
NP_115766.3|	MKI67IP	|MKI67IP|84365|Q9BYG3|MKI67 FHA domain-interacting nucleolar phosphoprotein [Homo sapiens]	LLECHFMPPEK	LLEC[+418.1]HFM[+16]PPEK	LLEC#HFMPPEK	889.391	2	C118	62.92	312545568	-0.204397	BTD
NP_115766.3|	MKI67IP	|MKI67IP|84365|Q9BYG3|MKI67 FHA domain-interacting nucleolar phosphoprotein [Homo sapiens]	LLECHFMPPEK	LLEC[+418.1]HFM[+16]PPEK	LLEC#HFMPPEK	593.263	3	C118	62.92	1479436672	0.348315	BTD
NP_078934.3|	IPO4	|IPO4|79711|Q8TEX9;B3KT38|importin-4 [Homo sapiens]	LLECPHLNVR	LLEC[+418.1]PHLNVR	LLEC#PHLNVR	806.392	2	C708	66.07	2489823616	0.826898	BTD
NP_078934.3|	IPO4	|IPO4|79711|Q8TEX9;B3KT38|importin-4 [Homo sapiens]	LLECPHLNVR	LLEC[+418.1]PHLNVR	LLEC#PHLNVR	537.931	3	C708	66.07	17579020288	7.97408	BTD
NP_002215.2|	ITPR3	|ITPR3|3710|Q14573;A6H8K3;Q59ES2|inositol 1,4,5-trisphosphate receptor type 3 [Homo sapiens]	LLECPWLQQQHK	LLEC[+418.1]PWLQQQHK	LLEC#PWLQQQHK	970.961	2	C1511	73.68	303211968	-0.208818	BTD
NP_002215.2|	ITPR3	|ITPR3|3710|Q14573;A6H8K3;Q59ES2|inositol 1,4,5-trisphosphate receptor type 3 [Homo sapiens]	LLECPWLQQQHK	LLEC[+418.1]PWLQQQHK	LLEC#PWLQQQHK	647.643	3	C1511	73.68	1814542656	0.507042	BTD
NP_006420.1|	CCT7	|CCT7|10574|Q99832|T-complex protein 1 subunit eta isoform a [Homo sapiens]	LLEKCAMTALSSK	LLEKC[+418.1]AM[+16]TALSSK	LLEKC#AMTALSSK	914.936	2	C158	58.24	684278784	-0.0283213	BTD
NP_006420.1|	CCT7	|CCT7|10574|Q99832|T-complex protein 1 subunit eta isoform a [Homo sapiens]	LLEKCAMTALSSK	LLEKC[+418.1]AM[+16]TALSSK	LLEKC#AMTALSSK	610.293	3	C158	58.24	1248672960	0.239011	BTD
NP_006504.2|	SARS	|SARS|6301|P49591;Q0VGA5|serine--tRNA ligase, cytoplasmic [Homo sapiens]	LLIDEAILKCDAER	LLIDEAILKC[+418.1]DAER	LLIDEAILKC#DAER	674.001	3	C117	76.57	31646186	-0.337449	BTD
NP_005780.2|	PSME3	|PSME3|10197|P61289|proteasome activator complex subunit 3 isoform 1 [Homo sapiens]	LLIEKCNTVK	LLIEKC[+418.1]NTVK	LLIEKC#NTVK	789.905	2	C133	56.93	722332544	-0.0102967	BTD
NP_005780.2|	PSME3	|PSME3|10197|P61289|proteasome activator complex subunit 3 isoform 1 [Homo sapiens]	LLIEKCNTVK	LLIEKC[+418.1]NTVK	LLIEKC#NTVK	526.939	3	C133	56.93	2411263360	0.789686	BTD
NP_006827.1|	GCN1L1	|GCN1L1|10985|Q92616|translational activator GCN1 [Homo sapiens]	LLKPECVLDK	LLKPEC[+418.1]VLDK	LLKPEC#VLDK	788.399	2	C932	66.34	521238336	-0.105547	BTD
NP_006827.1|	GCN1L1	|GCN1L1|10985|Q92616|translational activator GCN1 [Homo sapiens]	LLKPECVLDK	LLKPEC[+418.1]VLDK	LLKPEC#VLDK	525.935	3	C932	66.34	1613001152	0.41158	BTD
NP_060700.2|	NUP133	|NUP133|55746|Q8WUM0|nuclear pore complex protein Nup133 [Homo sapiens]	LLLCEHAEK	LLLC[+418.1]EHAEK	LLLC#EHAEK	737.347	2	C641	62.22	104228324	-0.303069	BTD
NP_002861.1|	RAB13	|RAB13|5872|P51153|ras-related protein Rab-13 [Homo sapiens]	LLLGNKCDMEAK	LLLGNKC[+418.1]DM[+16]EAK	LLLGNKC#DMEAK	590.274	3	C123	56.08	983886976	0.113592	BTD
NP_055592.2|	URB2	|URB2|9816|Q14146|unhealthy ribosome biogenesis protein 2 homolog [Homo sapiens]	LLLNCPLSGEK	LLLNC[+418.1]PLSGEK	LLLNC#PLSGEK	802.894	2	C1280	75.7	312458000	-0.204439	BTD
NP_995319.1|	GMPPA	|GMPPA|29926|Q96IJ6|mannose-1-phosphate guanyltransferase alpha [Homo sapiens]	LLPAITILGCR	LLPAITILGC[+418.1]R	LLPAITILGC#R	794.423	2	C389	87.79	16310804	-0.344713	BTD
NP_055950.1|	NUP205	|NUP205|23165|Q92621|nuclear pore complex protein Nup205 [Homo sapiens]	LLQCLHAK	LLQC[+418.1]LHAK	LLQC#LHAK	672.334	2	C1275	57.86	208442000	-0.253707	BTD
NP_055950.1|	NUP205	|NUP205|23165|Q92621|nuclear pore complex protein Nup205 [Homo sapiens]	LLQCLHAK	LLQC[+418.1]LHAK	LLQC#LHAK	448.558	3	C1275	57.86	241547912	-0.238026	BTD
NP_066918.2|	SLC5A6	|SLC5A6|8884|Q9Y289;Q9HD19|sodium-dependent multivitamin transporter [Homo sapiens]	LLSLLPLSCQK	LLSLLPLSC[+418.1]QK	LLSLLPLSC#QK	816.928	2	C577	83.81	57041938	-0.32542	BTD
NP_066918.2|	SLC5A6	|SLC5A6|8884|Q9Y289;Q9HD19|sodium-dependent multivitamin transporter [Homo sapiens]	LLSLLPLSCQK	LLSLLPLSC[+418.1]QK	LLSLLPLSC#QK	544.954	3	C577	83.81	26419605	-0.339925	BTD
NP_004779.2|	UBE4A	|UBE4A|9354|Q14139|ubiquitin conjugation factor E4 A isoform 1 [Homo sapiens]	LLTFNPTYCALK	LLTFNPTYC[+418.1]ALK	LLTFNPTYC#ALK	901.436	2	C472	80.04	54404936	-0.326669	BTD
NP_006351.2|	EIF3M	|EIF3M|10480|Q7L2H7|eukaryotic translation initiation factor 3 subunit M [Homo sapiens]	LLYEALVDCK	LLYEALVDC[+418.1]K	LLYEALVDC#K	792.875	2	C175	77.9	94121772	-0.307857	BTD
NP_006351.2|	EIF3M	|EIF3M|10480|Q7L2H7|eukaryotic translation initiation factor 3 subunit M [Homo sapiens]	LLYEALVDCK	LLYEALVDC[+418.1]K	LLYEALVDC#K	528.919	3	C175	77.9	38688263	-0.334113	BTD
NP_004994.1|	NDUFAB1	|NDUFAB1|4706|O14561|acyl carrier protein, mitochondrial precursor [Homo sapiens]	LMCPQEIVDYIADKK	LM[+16]C[+418.1]PQEIVDYIADKK	LMC#PQEIVDYIADKK	734.009	3	C140	76.72	70001436	-0.319281	BTD
NP_004823.1|	GSTO1	|GSTO1|9446|P78417|glutathione S-transferase omega-1 isoform 1 [Homo sapiens]	LNECVDHTPK	LNEC[+418.1]VDHTPK	LNEC#VDHTPK	787.342	2	C192	48.53	80571728	-0.314275	BTD
NP_004823.1|	GSTO1	|GSTO1|9446|P78417|glutathione S-transferase omega-1 isoform 1 [Homo sapiens]	LNECVDHTPK	LNEC[+418.1]VDHTPK	LNEC#VDHTPK	525.231	3	C192	48.53	556814464	-0.0886964	BTD
NP_859050.1|	PPP2R1B	|PPP2R1B|5519|P30154|serine/threonine-protein phosphatase 2A 65 kDa regulatory subunit A beta isoform isoform b [Homo sapiens]	LNIISNLDCVNEVIGIR	LNIISNLDC[+418.1]VNEVIGIR	LNIISNLDC#VNEVIGIR	768.389	3	C402	92.21	22570786	-0.341748	BTD
NP_001001.2|	RPS6	|RPS6|6194|P62753;A2A3R6|40S ribosomal protein S6 [Homo sapiens]	LNISFPATGCQK	LNISFPATGC[+418.1]QK	LNISFPATGC#QK	848.895	2	C12	70.64	810310752	0.0313753	BTD
NP_001001.2|	RPS6	|RPS6|6194|P62753;A2A3R6|40S ribosomal protein S6 [Homo sapiens]	LNISFPATGCQK	LNISFPATGC[+418.1]QK	LNISFPATGC#QK	566.266	3	C12	70.64	452272864	-0.138214	BTD
NP_001010.2|	RPS15A	|RPS15A|6210|P62244;B2R4W8|40S ribosomal protein S15a [Homo sapiens]	LNKCGVISPR	LNKC[+418.1]GVISPR	LNKC#GVISPR	752.874	2	C72	53.76	510939408	-0.110426	BTD
NP_001010.2|	RPS15A	|RPS15A|6210|P62244;B2R4W8|40S ribosomal protein S15a [Homo sapiens]	LNKCGVISPR	LNKC[+418.1]GVISPR	LNKC#GVISPR	502.251	3	C72	53.76	1465063040	0.341507	BTD
NP_057018.1|	NOP58	|NOP58|51602|Q9Y2X3|nucleolar protein 58 [Homo sapiens]	LNLSCIHSPVVNELMR	LNLSC[+418.1]IHSPVVNELM[+16]R	LNLSC#IHSPVVNELMR	753.695	3	C106	71.71	1045288288	0.142675	BTD
NP_004437.2|	EPRS	|EPRS|2058|P07814|bifunctional glutamate/proline--tRNA ligase [Homo sapiens]	LNQWCNVVR	LNQWC[+418.1]NVVR	LNQWC#NVVR	775.356	2	C1148	69.31	201900000	-0.256806	BTD
NP_001524.2|	HNRNPL	|HNRNPL|3191|P14866;Q6NTA2|heterogeneous nuclear ribonucleoprotein L isoform a [Homo sapiens]	LNVCVSK	LNVC[+418.1]VSK	LNVC#VSK	590.778	2	C452	61.18	225306548	-0.245719	BTD
NP_079106.3|	LPCAT1	|LPCAT1|79888|Q8NF37|lysophosphatidylcholine acyltransferase 1 [Homo sapiens]	LPADTCLLEFAR	LPADTC[+418.1]LLEFAR	LPADTC#LLEFAR	883.916	2	C330	84.6	208863472	-0.253508	BTD
NP_079106.3|	LPCAT1	|LPCAT1|79888|Q8NF37|lysophosphatidylcholine acyltransferase 1 [Homo sapiens]	LPADTCLLEFAR	LPADTC[+418.1]LLEFAR	LPADTC#LLEFAR	589.613	3	C330	84.6	42954322	-0.332093	BTD
NP_036313.3|	FKBP8	|FKBP8|23770|Q14318|peptidyl-prolyl cis-trans isomerase FKBP8 [Homo sapiens]	LPAKCPGK	LPAKC[+418.1]PGK	LPAKC#PGK	616.302	2	C379	46.12	312827552	-0.204264	BTD
NP_036313.3|	FKBP8	|FKBP8|23770|Q14318|peptidyl-prolyl cis-trans isomerase FKBP8 [Homo sapiens]	LPAKCPGK	LPAKC[+418.1]PGK	LPAKC#PGK	411.204	3	C379	46.12	1047459776	0.143704	BTD
NP_057731.1|	THEM6	|THEM6|51337|Q8WUY1|UPF0670 protein THEM6 precursor [Homo sapiens]	LPCAVLR	LPC[+418.1]AVLR	LPC#AVLR	595.296	2	C29	70.19	387893296	-0.168708	BTD
NP_001166925.1|	PDHA1	|PDHA1|5160|P08559|pyruvate dehydrogenase E1 component subunit alpha, somatic form, mitochondrial isoform 2 precursor [Homo sapiens]	LPCIFICENNR	LPC[+418.1]IFIC[+57]ENNR	LPC#IFICENNR	898.899	2	C256	81.57	49218344	-0.329126	BTD
NP_001166925.1|	PDHA1	|PDHA1|5160|P08559|pyruvate dehydrogenase E1 component subunit alpha, somatic form, mitochondrial isoform 2 precursor [Homo sapiens]	LPCIFICENNR	LPC[+418.1]IFIC[+57]ENNR	LPC#IFICENNR	599.602	3	C256	81.57	20791337	-0.34259	BTD
NP_004068.2|	CS	|CS|1431|O75390|citrate synthase, mitochondrial precursor [Homo sapiens]	LPCVAAK	LPC[+418.1]VAAK	LPC#VAAK	560.27	2	C211	63.01	783865504	0.0188492	BTD
NP_001028690.1|	WIPI2	|WIPI2|26100|Q9Y4P8|WD repeat domain phosphoinositide-interacting protein 2 isoform c [Homo sapiens]	LPFCGHK	LPFC[+418.1]GHK	LPFC#GHK	407.184	3	C328	64.28	135504044	-0.288255	BTD
NP_036546.2|	RAB3GAP2	|RAB3GAP2|25782|Q9H2M9;A6H8V0|rab3 GTPase-activating protein non-catalytic subunit [Homo sapiens]	LPFSCLR	LPFSC[+418.1]LR	LPFSC#LR	627.294	2	C608	74	236446672	-0.240443	BTD
NP_001160158.1|	PFKM	|PFKM|5213|P08237|6-phosphofructokinase, muscle type isoform 1 [Homo sapiens]	LPLMECVQVTK	LPLM[+16]EC[+418.1]VQVTK	LPLMEC#VQVTK	847.901	2	C422	68.54	721968288	-0.0104692	BTD
NP_002793.2|	PSMC1	|PSMC1|5700|P62191;Q53XL8|26S protease regulatory subunit 4 [Homo sapiens]	LPLVTPHTQCR	LPLVTPHTQC[+418.1]R	LPLVTPHTQC#R	561.61	3	C58	57.99	279910816	-0.219855	BTD
NP_055970.1|	LARP4B	|LARP4B|23185|Q92615|la-related protein 4B [Homo sapiens]	LPSALTATACK	LPSALTATAC[+418.1]K	LPSALTATAC#K	747.36	2	C633	65.32	377619712	-0.173574	BTD
NP_008835.5|	PRKDC	|PRKDC|5591|P78527|DNA-dependent protein kinase catalytic subunit isoform 1 [Homo sapiens]	LPVLAGCLK	LPVLAGC[+418.1]LK	LPVLAGC#LK	666.346	2	C223	75.83	1039839008	0.140094	BTD
NP_008835.5|	PRKDC	|PRKDC|5591|P78527|DNA-dependent protein kinase catalytic subunit isoform 1 [Homo sapiens]	LPVLAGCLK	LPVLAGC[+418.1]LK	LPVLAGC#LK	444.567	3	C223	75.83	572609808	-0.0812147	BTD
NP_005886.2|	GOLGA3	|GOLGA3|2802|Q08378|Golgin subfamily A member 3 isoform 1 [Homo sapiens]	LQAQVECSHSSQQR	LQAQVEC[+418.1]SHSSQQR	LQAQVEC#SHSSQQR	673.632	3	C455	46.84	103254512	-0.303531	BTD
NP_008835.5|	PRKDC	|PRKDC|5591|P78527|DNA-dependent protein kinase catalytic subunit isoform 1 [Homo sapiens]	LQETLSAADRCGAALAGHQLIR	LQETLSAADRC[+418.1]GAALAGHQLIR	LQETLSAADRC#GAALAGHQLIR	904.783	3	C25	66.96	160505296	-0.276413	BTD
NP_001367.2|	DYNC1H1	|DYNC1H1|1778|Q14204|cytoplasmic dynein 1 heavy chain 1 [Homo sapiens]	LQGATCNNNK	LQGATC[+418.1]NNNK	LQGATC#NNNK	740.819	2	C4570	46.49	153423792	-0.279767	BTD
NP_937884.1|	EIF4G1	|EIF4G1|1981|Q04637;Q96I65|eukaryotic translation initiation factor 4 gamma 1 isoform 5 [Homo sapiens]	LQGINCGPDFTPSFANLGR	LQGINC[+418.1]GPDFTPSFANLGR	LQGINC#GPDFTPSFANLGR	809.04	3	C662	81.13	140098144	-0.286079	BTD
NP_079110.1|	MCMBP	|MCMBP|79892|Q9BTE3|mini-chromosome maintenance complex-binding protein isoform 1 [Homo sapiens]	LQHINPLLPACLNK	LQHINPLLPAC[+418.1]LNK	LQHINPLLPAC#LNK	664.678	3	C325	72.76	420257888	-0.153378	BTD
NP_005564.1|	LMNB1	|LMNB1|4001|P20700|lamin-B1 isoform 1 [Homo sapiens]	LQIELGKCK	LQIELGKC[+418.1]K	LQIELGKC#K	725.365	2	C110	61.5	185484224	-0.264582	BTD
NP_005564.1|	LMNB1	|LMNB1|4001|P20700|lamin-B1 isoform 1 [Homo sapiens]	LQIELGKCK	LQIELGKC[+418.1]K	LQIELGKC#K	483.912	3	C110	61.5	285712064	-0.217107	BTD
NP_005710.1|	ARPC3	|ARPC3|10094|O15145|actin-related protein 2/3 complex subunit 3 [Homo sapiens]	LQKCNSK	LQKC[+418.1]NSK	LQKC#NSK	619.786	2	C85	35.63	75603974	-0.316628	BTD
NP_005710.1|	ARPC3	|ARPC3|10094|O15145|actin-related protein 2/3 complex subunit 3 [Homo sapiens]	LQKCNSK	LQKC[+418.1]NSK	LQKC#NSK	413.527	3	C85	35.63	250457744	-0.233806	BTD
NP_005029.1|	PPID	|PPID|5481|Q08752;E5KN55|peptidyl-prolyl cis-trans isomerase D [Homo sapiens]	LQPIALSCVLNIGACK	LQPIALSC[+57]VLNIGAC[+418.1]K	LQPIALSCVLNIGAC#K	706.69	3	C282	87.71	37551228	-0.334652	BTD
NP_001340.2|	DARS	|DARS|1615|P14868|aspartate--tRNA ligase, cytoplasmic [Homo sapiens]	LQSGICHLFR	LQSGIC[+418.1]HLFR	LQSGIC#HLFR	531.255	3	C203	70.51	160552056	-0.276391	BTD
NP_001070908.1|	BCLAF1	|BCLAF1|9774|Q9NYF8|bcl-2-associated transcription factor 1 isoform 2 [Homo sapiens]	LRCDSADLR	LRC[+418.1]DSADLR	LRC#DSADLR	489.555	3	C686	52.95	164238240	-0.274645	BTD
NP_004095.4|	FASN	|FASN|2194|P49327|fatty acid synthase [Homo sapiens]	LRCVLLSNLSSTSHVPEVDPGSAELQK	LRC[+418.1]VLLSNLSSTSHVPEVDPGSAELQK	LRC#VLLSNLSSTSHVPEVDPGSAELQK	825.162	4	C1471	75.79	241579968	-0.238011	BTD
NP_079106.3|	LPCAT1	|LPCAT1|79888|Q8NF37|lysophosphatidylcholine acyltransferase 1 [Homo sapiens]	LRGCGPR	LRGC[+418.1]GPR	LRGC#GPR	392.852	3	C6	45.09	155664448	-0.278706	BTD
NP_003079.1|	FSCN1	|FSCN1|6624|Q16658;B3KTA3|fascin [Homo sapiens]	LSCFAQTVSPAEK	LSC[+418.1]FAQTVSPAEK	LSC#FAQTVSPAEK	899.911	2	C121	68.59	65207932	-0.321552	BTD
NP_055746.3|	PPP6R1	|PPP6R1|22870|Q9UPN7|serine/threonine-protein phosphatase 6 regulatory subunit 1 [Homo sapiens]	LSCFHQLLLEPPK	LSC[+418.1]FHQLLLEPPK	LSC#FHQLLLEPPK	648.323	3	C326	75.36	145801552	-0.283378	BTD
NP_001367.2|	DYNC1H1	|DYNC1H1|1778|Q14204|cytoplasmic dynein 1 heavy chain 1 [Homo sapiens]	LSCLPAFK	LSC[+418.1]LPAFK	LSC#LPAFK	648.809	2	C3940	75.9	505611632	-0.112949	BTD
NP_116045.2|	DHX37	|DHX37|57647|Q8IY37|probable ATP-dependent RNA helicase DHX37 [Homo sapiens]	LSCPITALGR	LSC[+418.1]PITALGR	LSC#PITALGR	724.855	2	C766	73.61	652629120	-0.0433126	BTD
NP_620119.2|	BAX	|BAX|581|Q07812|apoptosis regulator BAX isoform sigma [Homo sapiens]	LSECLKR	LSEC[+418.1]LKR	LSEC#LKR	633.802	2	C62	50.5	113461220	-0.298696	BTD
NP_620119.2|	BAX	|BAX|581|Q07812|apoptosis regulator BAX isoform sigma [Homo sapiens]	LSECLKR	LSEC[+418.1]LKR	LSEC#LKR	422.87	3	C62	50.5	473208912	-0.128297	BTD
NP_003461.2|	USP7	|USP7|7874|Q93009;Q6U8A4|ubiquitin carboxyl-terminal hydrolase 7 [Homo sapiens]	LSESVLSPPCFVR	LSESVLSPPC[+418.1]FVR	LSESVLSPPC#FVR	926.442	2	C90	80.95	86684216	-0.311379	BTD
NP_055738.3|	FNDC3A	|FNDC3A|22862|Q9Y2H6|fibronectin type-III domain-containing protein 3A isoform 2 [Homo sapiens]	LSPAMGCK	LSPAM[+16]GC[+418.1]K	LSPAMGC#K	620.762	2	C383	51.68	124272280	-0.293575	BTD
NP_001153239.1|	BZW2	|BZW2|28969|Q9Y6E2|basic leucine zipper and W2 domain-containing protein 2 [Homo sapiens]	LSQECPIK	LSQEC[+418.1]PIK	LSQEC#PIK	668.307	2	C270	57.83	9373843968	4.0876	BTD
NP_001153239.1|	BZW2	|BZW2|28969|Q9Y6E2|basic leucine zipper and W2 domain-containing protein 2 [Homo sapiens]	LSQECPIK	LSQEC[+418.1]PIK	LSQEC#PIK	445.874	3	C270	57.83	659749104	-0.0399401	BTD
NP_001153239.1|	BZW2	|BZW2|28969|Q9Y6E2|basic leucine zipper and W2 domain-containing protein 2 [Homo sapiens]	LSQECPIKEVVLYVK	LSQEC[+418.1]PIKEVVLYVK	LSQEC#PIKEVVLYVK	722.704	3	C270	82.76	96248952	-0.306849	BTD
NP_055955.1|	TTLL12	|TTLL12|23170|Q14166|tubulin--tyrosine ligase-like protein 12 [Homo sapiens]	LSQERPGVLLNQFPCENLLTVK	LSQERPGVLLNQFPC[+418.1]ENLLTVK	LSQERPGVLLNQFPC#ENLLTVK	972.83	3	C361	82.04	127205792	-0.292186	BTD
NP_060225.4|	NSUN2	|NSUN2|54888|Q08J23|tRNA (cytosine(34)-C(5))-methyltransferase isoform 1 [Homo sapiens]	LSSPCIMVVNHDASSIPR	LSSPC[+418.1]IM[+16]VVNHDASSIPR	LSSPC#IMVVNHDASSIPR	787.366	3	C235	65.91	211633536	-0.252196	BTD
NP_001307.2|	CSE1L	|CSE1L|1434|P55060|exportin-2 isoform 1 [Homo sapiens]	LSTACPGR	LSTAC[+418.1]PGR	LSTAC#PGR	611.771	2	C939	54.43	2028548928	0.608409	BTD
NP_060918.2|	CAND1	|CAND1|55832|Q86VP6|cullin-associated NEDD8-dissociated protein 1 [Homo sapiens]	LSTLCPSAVLQR	LSTLC[+418.1]PSAVLQR	LSTLC#PSAVLQR	853.424	2	C1134	77.39	95981804	-0.306976	BTD
NP_001193496.1|	IFI16	|IFI16|3428|Q16666;B4DJT8;H3BLV7|gamma-interferon-inducible protein 16 isoform 1 [Homo sapiens]	LTCFELAPK	LTC[+418.1]FELAPK	LTC#FELAPK	720.339	2	C681	74	390121312	-0.167653	BTD
NP_055486.2|	UBE3C	|UBE3C|9690|Q15386|ubiquitin-protein ligase E3C [Homo sapiens]	LTCLFQIK	LTC[+418.1]LFQIK	LTC#LFQIK	692.344	2	C140	82.21	70966080	-0.318825	BTD
NP_002128.1|	HNRNPA2B1	|HNRNPA2B1|3181|P22626|heterogeneous nuclear ribonucleoproteins A2/B1 isoform A2 [Homo sapiens]	LTDCVVMR	LTDC[+418.1]VVM[+16]R	LTDC#VVMR	685.799	2	C38	61.81	1075908288	0.157179	BTD
NP_002128.1|	HNRNPA2B1	|HNRNPA2B1|3181|P22626|heterogeneous nuclear ribonucleoproteins A2/B1 isoform A2 [Homo sapiens]	LTDCVVMRDPASK	LTDC[+418.1]VVM[+16]RDPASK	LTDC#VVMRDPASK	623.616	3	C38	56.53	334275952	-0.194105	BTD
NP_056655.2|	ADAR	|ADAR|103|P55265|double-stranded RNA-specific adenosine deaminase isoform b [Homo sapiens]	LTECQLK	LTEC[+418.1]QLK	LTEC#QLK	626.789	2	C499	57.36	187134904	-0.2638	BTD
NP_001021.1|	RPS27	|RPS27|6232|P42677;Q5T4L6|40S ribosomal protein S27 [Homo sapiens]	LTEGCSFR	LTEGC[+418.1]SFR	LTEGC#SFR	665.781	2	C77	60.97	289717636	-0.21521	BTD
NP_006592.3|	PTGES3	|PTGES3|10728|Q15185|prostaglandin E synthase 3 [Homo sapiens]	LTFSCLGGSDNFK	LTFSC[+418.1]LGGSDNFK	LTFSC#LGGSDNFK	903.895	2	C40	76.51	215812496	-0.250216	BTD
NP_006592.3|	PTGES3	|PTGES3|10728|Q15185|prostaglandin E synthase 3 [Homo sapiens]	LTFSCLGGSDNFK	LTFSC[+418.1]LGGSDNFK	LTFSC#LGGSDNFK	602.932	3	C40	76.51	67113842	-0.320649	BTD
NP_001193496.1|	IFI16	|IFI16|3428|Q16666;B4DJT8;H3BLV7|gamma-interferon-inducible protein 16 isoform 1 [Homo sapiens]	LTTINCEEGDKLK	LTTINC[+418.1]EEGDKLK	LTTINC#EEGDKLK	941.44	2	C671	56.44	54429998	-0.326657	BTD
NP_001193496.1|	IFI16	|IFI16|3428|Q16666;B4DJT8;H3BLV7|gamma-interferon-inducible protein 16 isoform 1 [Homo sapiens]	LTTINCEEGDKLK	LTTINC[+418.1]EEGDKLK	LTTINC#EEGDKLK	627.962	3	C671	56.44	352344336	-0.185546	BTD
NP_060979.2|	LRRC59	|LRRC59|55379|Q96AG4|leucine-rich repeat-containing protein 59 [Homo sapiens]	LTTLPSDFCGLTHLVK	LTTLPSDFC[+418.1]GLTHLVK	LTTLPSDFC#GLTHLVK	721.692	3	C59	81.4	263877248	-0.22745	BTD
NP_006078.2|	TUBB4A	|TUBB4A|10382|P04350|tubulin beta-4A chain [Homo sapiens]	LTTPTYGDLNHLVSATMSGVTTCLR	LTTPTYGDLNHLVSATM[+16]SGVTTC[+418.1]LR	LTTPTYGDLNHLVSATMSGVTTC#LR	1029.15	3	C239	83.79	202298656	-0.256617	BTD
NP_006078.2|	TUBB4A	|TUBB4A|10382|P04350|tubulin beta-4A chain [Homo sapiens]	LTTPTYGDLNHLVSATMSGVTTCLR	LTTPTYGDLNHLVSATM[+16]SGVTTC[+418.1]LR	LTTPTYGDLNHLVSATMSGVTTC#LR	772.116	4	C239	83.79	215523408	-0.250353	BTD
NP_874365.3|	SCRIB	|SCRIB|23513|Q14160;A0PJK8|protein scribble homolog isoform a [Homo sapiens]	LVCLDVSENR	LVC[+418.1]LDVSENR	LVC#LDVSENR	783.358	2	C224	69.72	24449075	-0.340858	BTD
NP_001007.2|	RPS12	|RPS12|6206|P25398|40S ribosomal protein S12 [Homo sapiens]	LVEALCAEHQINLIK	LVEALC[+418.1]AEHQINLIK	LVEALC#AEHQINLIK	1056.53	2	C69	71.34	66475364	-0.320952	BTD
NP_001007.2|	RPS12	|RPS12|6206|P25398|40S ribosomal protein S12 [Homo sapiens]	LVEALCAEHQINLIK	LVEALC[+418.1]AEHQINLIK	LVEALC#AEHQINLIK	704.692	3	C69	71.34	388227904	-0.16855	BTD
NP_000980.1|	RPL30	|RPL30|6156|P62888|60S ribosomal protein L30 [Homo sapiens]	LVILANNCPALR	LVILANNC[+418.1]PALR	LVILANNC#PALR	857.942	2	C52	75.45	406624464	-0.159836	BTD
NP_000980.1|	RPL30	|RPL30|6156|P62888|60S ribosomal protein L30 [Homo sapiens]	LVILANNCPALR	LVILANNC[+418.1]PALR	LVILANNC#PALR	572.297	3	C52	75.45	153073216	-0.279933	BTD
NP_001026997.1|	BOLA2	|BOLA2|552900|Q9H3K6|BolA-like protein 2 [Homo sapiens]	LVNACLAEELPHIHAFEQK	LVNAC[+418.1]LAEELPHIHAFEQK	LVNAC#LAEELPHIHAFEQK	645.815	4	C125	74.45	463991824	-0.132663	BTD
NP_612430.2|	SAAL1	|SAAL1|113174|Q96ER3;G1UCX3|protein SAAL1 [Homo sapiens]	LVPCILEAAK	LVPC[+418.1]ILEAAK	LVPC#ILEAAK	737.875	2	C248	80.61	247548272	-0.235184	BTD
NP_001367.2|	DYNC1H1	|DYNC1H1|1778|Q14204|cytoplasmic dynein 1 heavy chain 1 [Homo sapiens]	LVQTPLTDRCYLTMTQALEAR	LVQTPLTDRC[+418.1]YLTM[+16]TQALEAR	LVQTPLTDRC#YLTMTQALEAR	953.128	3	C1888	72.7	379036880	-0.172903	BTD
NP_001092090.1|	PCBP2	|PCBP2|5094|Q15366|poly(rC)-binding protein 2 isoform c [Homo sapiens]	LVVPASQCGSLIGK	LVVPASQC[+418.1]GSLIGK	LVVPASQC#GSLIGK	895.452	2	C109	71.06	408377200	-0.159006	BTD
NP_001092090.1|	PCBP2	|PCBP2|5094|Q15366|poly(rC)-binding protein 2 isoform c [Homo sapiens]	LVVPASQCGSLIGK	LVVPASQC[+418.1]GSLIGK	LVVPASQC#GSLIGK	597.304	3	C109	71.06	325436032	-0.198292	BTD
NP_006187.2|	PCBP1	|PCBP1|5093|Q15365;Q53SS8|poly(rC)-binding protein 1 [Homo sapiens]	LVVPATQCGSLIGK	LVVPATQC[+418.1]GSLIGK	LVVPATQC#GSLIGK	902.46	2	C109	72.24	251684512	-0.233225	BTD
NP_006187.2|	PCBP1	|PCBP1|5093|Q15365;Q53SS8|poly(rC)-binding protein 1 [Homo sapiens]	LVVPATQCGSLIGK	LVVPATQC[+418.1]GSLIGK	LVVPATQC#GSLIGK	601.976	3	C109	72.24	294316144	-0.213032	BTD
NP_003671.1|	YARS	|YARS|8565|P54577|tyrosine--tRNA ligase, cytoplasmic [Homo sapiens]	LVVVLCNLKPQK	LVVVLC[+418.1]NLKPQK	LVVVLC#NLKPQK	886.484	2	C424	71.13	35626195	-0.335564	BTD
NP_003671.1|	YARS	|YARS|8565|P54577|tyrosine--tRNA ligase, cytoplasmic [Homo sapiens]	LVVVLCNLKPQK	LVVVLC[+418.1]NLKPQK	LVVVLC#NLKPQK	591.325	3	C424	71.13	201823912	-0.256842	BTD
NP_006089.1|	GNB2L1	|GNB2L1|10399|P63244;E9KL35|guanine nucleotide-binding protein subunit beta-2-like 1 [Homo sapiens]	LWNTLGVCK	LWNTLGVC[+418.1]K	LWNTLGVC#K	726.344	2	C138	74.49	132966160	-0.289457	BTD
NP_004586.2|	SMS	|SMS|6611|P52788|spermine synthase isoform 1 [Homo sapiens]	LYCPVEFSK	LYC[+418.1]PVEFSK	LYC#PVEFSK	752.336	2	C337	73.09	78448496	-0.31528	BTD
NP_002262.3|	IPO5	|IPO5|3843|O00410;B3KWG6;Q9BVS9|importin-5 [Homo sapiens]	MACGLGGK	M[+16]AC[+418.1]GLGGK	MAC#GLGGK	585.741	2	C366	54.43	146373856	-0.283107	BTD
NP_003866.1|	GMPS	|GMPS|8833|P49915;A8K639|GMP synthase [glutamine-hydrolyzing] [Homo sapiens]	MCHNVNR	M[+16]C[+418.1]HNVNR	MC#HNVNR	436.507	3	C554	37.72	256729272	-0.230835	BTD
NP_001073867.1|	KIAA0368	|KIAA0368|23392|-|proteasome-associated protein ECM29 homolog [Homo sapiens]	MCLAHSAGVVPTSQSLADMQDHAPAIGR	M[+16]C[+418.1]LAHSAGVVPTSQSLADM[+16]QDHAPAIGR	MC#LAHSAGVVPTSQSLADMQDHAPAIGR	829.127	4	C774	61.22	203576288	-0.256012	BTD
NP_004492.2|	HNRNPU	|HNRNPU|3192|Q00839|heterogeneous nuclear ribonucleoprotein U isoform b [Homo sapiens]	MCLFAGFQR	M[+16]C[+418.1]LFAGFQR	MC#LFAGFQR	753.82	2	C575	79.59	454262896	-0.137271	BTD
NP_002678.2|	PNN	|PNN|5411|Q9H307|pinin [Homo sapiens]	MCPATQK	M[+16]C[+418.1]PATQK	MC#PATQK	606.746	2	C249	45.6	315698384	-0.202904	BTD
NP_056536.2|	GEMIN4	|GEMIN4|50628|P57678;Q8WUM5|gem-associated protein 4 [Homo sapiens]	MCSLAVVNLGTHK	M[+16]C[+418.1]SLAVVNLGTHK	MC#SLAVVNLGTHK	602.949	3	C565	67.27	305547840	-0.207712	BTD
NP_000997.1|	RPS3A	|RPS3A|6189|P61247|40S ribosomal protein S3a isoform 1 [Homo sapiens]	MCSMVK	M[+16]C[+418.1]SM[+16]VK	MC#SMVK	574.716	2	C111	45.2	448506688	-0.139998	BTD
NP_002203.1|	EIF6	|EIF6|3692|P56537|eukaryotic translation initiation factor 6 isoform a [Homo sapiens]	MCVGNR	M[+16]C[+418.1]VGNR	MC#VGNR	557.217	2	C63	47.28	358123968	-0.182809	BTD
NP_075050.3|	ACTR8	|ACTR8|93973|Q9H981|actin-related protein 8 [Homo sapiens]	MDCLLLQHLK	M[+16]DC[+418.1]LLLQHLK	MDC#LLLQHLK	549.928	3	C340	73.44	78832824	-0.315098	BTD
NP_002464.1|	MYH9	|MYH9|4627|P35579;Q60FE2|myosin-9 [Homo sapiens]	MEDSVGCLETAEEVK	M[+16]EDSVGC[+418.1]LETAEEVK	MEDSVGC#LETAEEVK	1037.43	2	C1379	66.87	24596480	-0.340788	BTD
NP_004125.3|	HSPA9	|HSPA9|3313|P38646|stress-70 protein, mitochondrial precursor [Homo sapiens]	MEEFKDQLPADECNKLK	M[+16]EEFKDQLPADEC[+418.1]NKLK	MEEFKDQLPADEC#NKLK	824.701	3	C608	56.3	640838624	-0.0488973	BTD
NP_004125.3|	HSPA9	|HSPA9|3313|P38646|stress-70 protein, mitochondrial precursor [Homo sapiens]	MEEFKDQLPADECNKLK	M[+16]EEFKDQLPADEC[+418.1]NKLK	MEEFKDQLPADEC#NKLK	618.777	4	C608	56.3	632517920	-0.0528385	BTD
NP_004125.3|	HSPA9	|HSPA9|3313|P38646|stress-70 protein, mitochondrial precursor [Homo sapiens]	MEEFKDQLPADECNKLKEEISK	M[+16]EEFKDQLPADEC[+418.1]NKLKEEISK	MEEFKDQLPADEC#NKLKEEISK	765.352	4	C608	61.37	1034319808	0.13748	BTD
NP_002152.2|	IARS	|IARS|3376|P41252|isoleucine--tRNA ligase, cytoplasmic [Homo sapiens]	MGITEYNNQCR	M[+16]GITEYNNQC[+418.1]R	MGITEYNNQC#R	881.853	2	C120	54.41	42275944	-0.332414	BTD
NP_000963.1|	RPL7A	|RPL7A|6130|P62424;Q5T8U4|60S ribosomal protein L7a [Homo sapiens]	MGVPYCIIK	M[+16]GVPYC[+418.1]IIK	MGVPYC#IIK	729.335	2	C182	75.22	1211055872	0.221193	BTD
NP_000963.1|	RPL7A	|RPL7A|6130|P62424;Q5T8U4|60S ribosomal protein L7a [Homo sapiens]	MGVPYCIIK	M[+16]GVPYC[+418.1]IIK	MGVPYC#IIK	486.559	3	C182	75.22	162254072	-0.275585	BTD
NP_006182.2|	PA2G4	|PA2G4|5036|Q9UQ80|proliferation-associated protein 2G4 [Homo sapiens]	MGVVECAK	M[+16]GVVEC[+418.1]AK	MGVVEC#AK	635.767	2	C296	54.39	144216176	-0.284129	BTD
NP_057226.1|	HSD17B12	|HSD17B12|51144|Q53GQ0|estradiol 17-beta-dehydrogenase 12 [Homo sapiens]	MININILSVCK	M[+16]ININILSVC[+418.1]K	MININILSVC#K	841.409	2	C166	82.06	186953064	-0.263886	BTD
NP_057226.1|	HSD17B12	|HSD17B12|51144|Q53GQ0|estradiol 17-beta-dehydrogenase 12 [Homo sapiens]	MININILSVCK	M[+16]ININILSVC[+418.1]K	MININILSVC#K	561.275	3	C166	82.06	131629776	-0.29009	BTD
NP_000166.2|	GPI	|GPI|2821|P06744|glucose-6-phosphate isomerase isoform 2 [Homo sapiens]	MIPCDFLIPVQTQHPIR	M[+16]IPC[+418.1]DFLIPVQTQHPIR	MIPC#DFLIPVQTQHPIR	814.73	3	C404	80.15	648184128	-0.045418	BTD
NP_005498.1|	CFL1	|CFL1|1072|P23528|cofilin-1 [Homo sapiens]	MLPDKDCR	M[+16]LPDKDC[+418.1]R	MLPDKDC#R	706.294	2	C80	46.67	1760337728	0.481367	BTD
NP_005498.1|	CFL1	|CFL1|1072|P23528|cofilin-1 [Homo sapiens]	MLPDKDCR	M[+16]LPDKDC[+418.1]R	MLPDKDC#R	471.198	3	C80	46.67	4766258944	1.90516	BTD
NP_001367.2|	DYNC1H1	|DYNC1H1|1778|Q14204|cytoplasmic dynein 1 heavy chain 1 [Homo sapiens]	MLSAVSQQVQCIQEALR	M[+16]LSAVSQQVQC[+418.1]IQEALR	MLSAVSQQVQC#IQEALR	780.038	3	C1977	83.91	76235296	-0.316329	BTD
NP_542784.1|	RPL10L	|RPL10L|140801|Q96L21|60S ribosomal protein L10-like [Homo sapiens]	MLSCAGADR	M[+16]LSC[+418.1]AGADR	MLSC#AGADR	679.27	2	C105	53.72	1096448128	0.166908	BTD
NP_937884.1|	EIF4G1	|EIF4G1|1981|Q04637;Q96I65|eukaryotic translation initiation factor 4 gamma 1 isoform 5 [Homo sapiens]	MLTEAIMHDCVVK	M[+16]LTEAIM[+16]HDC[+418.1]VVK	MLTEAIMHDC#VVK	647.286	3	C919	61.62	483202064	-0.123564	BTD
NP_002262.3|	IPO5	|IPO5|3843|O00410;B3KWG6;Q9BVS9|importin-5 [Homo sapiens]	MLVQCMQDQEHPSIR	M[+16]LVQC[+418.1]M[+16]QDQEHPSIR	MLVQC#MQDQEHPSIR	755.657	3	C198	54.12	142990480	-0.284709	BTD
NP_004598.1|	TBCA	|TBCA|6902|O75347;Q6FGD7|tubulin-specific chaperone A [Homo sapiens]	MMIPDCQR	M[+16]M[+16]IPDC[+418.1]QR	MMIPDC#QR	722.28	2	C67	55.45	1477391232	0.347346	BTD
NP_004598.1|	TBCA	|TBCA|6902|O75347;Q6FGD7|tubulin-specific chaperone A [Homo sapiens]	MMIPDCQR	M[+16]M[+16]IPDC[+418.1]QR	MMIPDC#QR	481.856	3	C67	55.45	343327168	-0.189817	BTD
NP_002408.3|	MKI67	|MKI67|4288|P46013|antigen KI-67 isoform 1 [Homo sapiens]	MPCQSLQPEPINTPTHTK	M[+16]PC[+418.1]QSLQPEPINTPTHTK	MPC#QSLQPEPINTPTHTK	819.373	3	C1007	56	599315552	-0.0685652	BTD
NP_036453.1|	LSM4	|LSM4|25804|Q9Y4Z0|U6 snRNA-associated Sm-like protein LSm4 isoform 1 [Homo sapiens]	MPECYIR	M[+16]PEC[+418.1]YIR	MPEC#YIR	673.272	2	C59	63.06	315196976	-0.203142	BTD
NP_060663.2|	FANCI	|FANCI|55215|Q9NVI1;B3KNW8|Fanconi anemia group I protein isoform 2 [Homo sapiens]	MPNQHACK	M[+16]PNQHAC[+418.1]K	MPNQHAC#K	454.851	3	C419	34.97	577090240	-0.0790925	BTD
NP_008835.5|	PRKDC	|PRKDC|5591|P78527|DNA-dependent protein kinase catalytic subunit isoform 1 [Homo sapiens]	MQLVCCR	M[+16]QLVC[+418.1]C[+57]R	MQLVC#CR	672.272	2	C457	55.94	211151568	-0.252424	BTD
NP_008835.5|	PRKDC	|PRKDC|5591|P78527|DNA-dependent protein kinase catalytic subunit isoform 1 [Homo sapiens]	MQLVCCR	M[+16]QLVC[+57]C[+418.1]R	MQLVCC#R	672.272	2	C458	57.77	275307736	-0.222036	BTD
NP_000652.2|	RPL9	|RPL9|6133|P32969;Q53Z07|60S ribosomal protein L9 [Homo sapiens]	MRPGVACSVSQAQK	MRPGVAC[+418.1]SVSQAQK	MRPGVAC#SVSQAQK	627.292	3	C134	51.48	488977856	-0.0460378	BTD
NP_000652.2|	RPL9	|RPL9|6133|P32969;Q53Z07|60S ribosomal protein L9 [Homo sapiens]	MRPGVACSVSQAQK	M[+16]RPGVAC[+418.1]SVSQAQK	MRPGVAC#SVSQAQK	948.432	2	C134	48.69	646875616	3.63337	BTD
NP_000652.2|	RPL9	|RPL9|6133|P32969;Q53Z07|60S ribosomal protein L9 [Homo sapiens]	MRPGVACSVSQAQK	M[+16]RPGVAC[+418.1]SVSQAQK	MRPGVAC#SVSQAQK	632.624	3	C134	48.69	8414879744	-0.120828	BTD
NP_001447.2|	FLNA	|FLNA|2316|P21333;Q60FE5;Q6NXF2|filamin-A isoform 1 [Homo sapiens]	MSCMDNK	M[+16]SC[+418.1]M[+16]DNK	MSC#MDNK	639.717	2	C1402	40.28	388458064	-0.16844	BTD
NP_055181.3|	GNL3	|GNL3|26354|Q9BVP2|guanine nucleotide-binding protein-like 3 isoform 1 [Homo sapiens]	MTCHKR	M[+16]TC[+418.1]HKR	MTC#HKR	403.837	3	C15	26.67	113303552	-0.298771	BTD
NP_036590.1|	TIMM13	|TIMM13|26517|Q9Y5L4|mitochondrial import inner membrane translocase subunit Tim13 [Homo sapiens]	MTDKCFR	M[+16]TDKC[+418.1]FR	MTDKC#FR	445.516	3	C46	50.37	116966644	-0.297036	BTD
NP_001153239.1|	BZW2	|BZW2|28969|Q9Y6E2|basic leucine zipper and W2 domain-containing protein 2 [Homo sapiens]	MTNHCVFSANEDHETIR	M[+16]TNHC[+418.1]VFSANEDHETIR	MTNHC#VFSANEDHETIR	813.337	3	C97	56.54	540446288	-0.0964494	BTD
NP_001153239.1|	BZW2	|BZW2|28969|Q9Y6E2|basic leucine zipper and W2 domain-containing protein 2 [Homo sapiens]	MTNHCVFSANEDHETIR	M[+16]TNHC[+418.1]VFSANEDHETIR	MTNHC#VFSANEDHETIR	610.254	4	C97	56.54	939862048	0.0927389	BTD
NP_001157108.1|	GTF2I	|GTF2I|2969|P78347;Q499G6|general transcription factor II-I isoform 5 [Homo sapiens]	MVDQLFCK	M[+16]VDQLFC[+418.1]K	MVDQLFC#K	709.301	2	C453	69.12	216575488	-0.249855	BTD
NP_001093.1|	ACTN1	|ACTN1|87|P12814|alpha-actinin-1 isoform b [Homo sapiens]	MVSDINNAWGCLEQVEK	M[+16]VSDINNAWGC[+418.1]LEQVEK	MVSDINNAWGC#LEQVEK	790.678	3	C370	80.6	67839140	-0.320306	BTD
NP_078930.3|	NOL9	|NOL9|79707|Q5SY16|polynucleotide 5'-hydroxyl-kinase NOL9 [Homo sapiens]	MVYYGKPSCK	M[+16]VYYGKPSC[+418.1]K	MVYYGKPSC#K	537.233	3	C379	48.78	66935592	-0.320734	BTD
NP_006614.2|	PHGDH	|PHGDH|26227|O43175|D-3-phosphoglycerate dehydrogenase [Homo sapiens]	NAGNCLSPAVIVGLLK	NAGNC[+418.1]LSPAVIVGLLK	NAGNC#LSPAVIVGLLK	994.011	2	C369	95.43	36029091	-0.335373	BTD
NP_006614.2|	PHGDH	|PHGDH|26227|O43175|D-3-phosphoglycerate dehydrogenase [Homo sapiens]	NAGNCLSPAVIVGLLK	NAGNC[+418.1]LSPAVIVGLLK	NAGNC#LSPAVIVGLLK	663.01	3	C369	95.43	85001884	-0.312176	BTD
NP_057322.2|	ANAPC7	|ANAPC7|51434|Q9UJX3;Q4KMX6;Q69YV3|anaphase-promoting complex subunit 7 isoform a [Homo sapiens]	NALANQSDCVLHR	NALANQSDC[+418.1]VLHR	NALANQSDC#VLHR	929.92	2	C509	60.82	91941424	-0.308889	BTD
NP_057322.2|	ANAPC7	|ANAPC7|51434|Q9UJX3;Q4KMX6;Q69YV3|anaphase-promoting complex subunit 7 isoform a [Homo sapiens]	NALANQSDCVLHR	NALANQSDC[+418.1]VLHR	NALANQSDC#VLHR	620.282	3	C509	60.82	198878780	-0.258237	BTD
NP_006799.1|	SEC61B	|SEC61B|10952|P60468|protein transport protein Sec61 subunit beta [Homo sapiens]	NASCGTR	NASC[+418.1]GTR	NASC#GTR	563.724	2	C39	43.79	309270928	-0.205948	BTD
NP_057542.2|	FAM203A	|FAM203A|51236|Q9BTY7|protein FAM203A [Homo sapiens]	NCCFEHR	NC[+418.1]C[+57]FEHR	NC#CFEHR	461.839	3	C227	50.88	595982240	-0.0701441	BTD
NP_690601.1|	ARPC2	|ARPC2|10109|O15144;Q53R19|actin-related protein 2/3 complex subunit 2 [Homo sapiens]	NCFASVFEK	NC[+418.1]FASVFEK	NC#FASVFEK	731.81	2	C120	77.73	353324544	-0.185082	BTD
NP_942127.1|	ACLY	|ACLY|47|P53396|ATP-citrate synthase isoform 2 [Homo sapiens]	NCGSFTR	NC[+418.1]GSFTR	NC#GSFTR	601.74	2	C1030	54.62	499724944	-0.115738	BTD
NP_060918.2|	CAND1	|CAND1|55832|Q86VP6|cullin-associated NEDD8-dissociated protein 1 [Homo sapiens]	NCIGDFLK	NC[+418.1]IGDFLK	NC#IGDFLK	664.294	2	C1007	78.85	84334244	-0.312493	BTD
NP_008835.5|	PRKDC	|PRKDC|5591|P78527|DNA-dependent protein kinase catalytic subunit isoform 1 [Homo sapiens]	NCISTVVHQGLIR	NC[+418.1]ISTVVHQGLIR	NC#ISTVVHQGLIR	929.459	2	C478	71.44	193487144	-0.260791	BTD
NP_008835.5|	PRKDC	|PRKDC|5591|P78527|DNA-dependent protein kinase catalytic subunit isoform 1 [Homo sapiens]	NCISTVVHQGLIR	NC[+418.1]ISTVVHQGLIR	NC#ISTVVHQGLIR	619.975	3	C478	71.44	1039309312	0.139843	BTD
NP_001003.1|	RPS8	|RPS8|6202|P62241;Q5JR94|40S ribosomal protein S8 [Homo sapiens]	NCIVLIDSTPYR	NC[+418.1]IVLIDSTPYR	NC#IVLIDSTPYR	906.426	2	C100	78.51	565253344	-0.0846992	BTD
NP_001003.1|	RPS8	|RPS8|6202|P62241;Q5JR94|40S ribosomal protein S8 [Homo sapiens]	NCIVLIDSTPYR	NC[+418.1]IVLIDSTPYR	NC#IVLIDSTPYR	604.62	3	C100	78.51	89786892	-0.30991	BTD
NP_004884.1|	H2AFY	|H2AFY|9555|O75367|core histone macro-H2A.1 isoform 2 [Homo sapiens]	NCLALADDKK	NC[+418.1]LALADDKK	NC#LALADDKK	754.847	2	C296	57.36	227034640	-0.244901	BTD
NP_004884.1|	H2AFY	|H2AFY|9555|O75367|core histone macro-H2A.1 isoform 2 [Homo sapiens]	NCLALADDKK	NC[+418.1]LALADDKK	NC#LALADDKK	503.567	3	C296	57.36	741203680	-0.00135812	BTD
NP_003900.1|	CPNE3	|CPNE3|8895|O75131;Q05DL8|copine-3 [Homo sapiens]	NCLNPQFSK	NC[+418.1]LNPQFSK	NC#LNPQFSK	734.821	2	C54	63.61	119381748	-0.295892	BTD
NP_000997.1|	RPS3A	|RPS3A|6189|P61247|40S ribosomal protein S3a isoform 1 [Homo sapiens]	NCLTNFHGMDLTR	NC[+418.1]LTNFHGM[+16]DLTR	NC#LTNFHGMDLTR	978.413	2	C96	63.58	439610944	-0.144211	BTD
NP_000997.1|	RPS3A	|RPS3A|6189|P61247|40S ribosomal protein S3a isoform 1 [Homo sapiens]	NCLTNFHGMDLTR	NC[+418.1]LTNFHGM[+16]DLTR	NC#LTNFHGMDLTR	652.611	3	C96	63.58	3081491968	1.10715	BTD
NP_004631.1|	DDX39B	|DDX39B|7919|Q13838|spliceosome RNA helicase DDX39B [Homo sapiens]	NCPHIVVGTPGR	NC[+418.1]PHIVVGTPGR	NC#PHIVVGTPGR	834.393	2	C165	58.07	114294196	-0.298302	BTD
NP_004631.1|	DDX39B	|DDX39B|7919|Q13838|spliceosome RNA helicase DDX39B [Homo sapiens]	NCPHIVVGTPGR	NC[+418.1]PHIVVGTPGR	NC#PHIVVGTPGR	556.598	3	C165	58.07	430055072	-0.148738	BTD
NP_005795.2|	DDX39A	|DDX39A|10212|O00148|ATP-dependent RNA helicase DDX39A [Homo sapiens]	NCPHVVVGTPGR	NC[+418.1]PHVVVGTPGR	NC#PHVVVGTPGR	827.385	2	C164	55.16	149543472	-0.281605	BTD
NP_005795.2|	DDX39A	|DDX39A|10212|O00148|ATP-dependent RNA helicase DDX39A [Homo sapiens]	NCPHVVVGTPGR	NC[+418.1]PHVVVGTPGR	NC#PHVVVGTPGR	551.926	3	C164	55.16	855861824	0.0529511	BTD
NP_036222.3|	MACF1	|MACF1|23499|Q9UPN3;Q6ZSD7|microtubule-actin cross-linking factor 1 isoform a [Homo sapiens]	NCPISAK	NC[+418.1]PISAK	NC#PISAK	575.755	2	C2758	54.07	244248704	-0.236747	BTD
NP_000982.2|	RPL28	|RPL28|6158|P46779|60S ribosomal protein L28 isoform 2 [Homo sapiens]	NCSSFLIK	NC[+418.1]SSFLIK	NC#SSFLIK	665.302	2	C13	70.11	1570502592	0.39145	BTD
NP_002786.2|	PSMB3	|PSMB3|5691|P49720|proteasome subunit beta type-3 [Homo sapiens]	NCVAIAADRR	NC[+418.1]VAIAADRR	NC#VAIAADRR	502.903	3	C19	54.29	557372448	-0.0884321	BTD
NP_057542.2|	FAM203A	|FAM203A|51236|Q9BTY7|protein FAM203A [Homo sapiens]	NCCFEHR	NC[+57]C[+418.1]FEHR	NCC#FEHR	461.839	3	C228	51.56	104547940	-0.302918	BTD
NP_874365.3|	SCRIB	|SCRIB|23513|Q14160;A0PJK8|protein scribble homolog isoform a [Homo sapiens]	NDIPEIPESIKFCK	NDIPEIPESIKFC[+418.1]K	NDIPEIPESIKFC#K	684.325	3	C104	73.81	161534592	-0.275926	BTD
NP_000099.2|	DLD	|DLD|1738|P09622|dihydrolipoyl dehydrogenase, mitochondrial precursor [Homo sapiens]	NETLGGTCLNVGCIPSK	NETLGGTC[+57]LNVGC[+418.1]IPSK	NETLGGTCLNVGC#IPSK	727.664	3	C85	70.63	178324688	-0.267973	BTD
NP_001073027.1|	HNRNPUL2	|HNRNPUL2|221092|Q1KMD3|heterogeneous nuclear ribonucleoprotein U-like protein 2 [Homo sapiens]	NFILDQCNVYNSGQR	NFILDQC[+418.1]NVYNSGQR	NFILDQC#NVYNSGQR	730.323	3	C538	73.43	111906288	-0.299433	BTD
NP_005144.2|	USP10	|USP10|9100|Q14694|ubiquitin carboxyl-terminal hydrolase 10 [Homo sapiens]	NFKCHR	NFKC[+418.1]HR	NFKC#HR	408.18	3	C728	39.4	146373400	-0.283107	BTD
NP_005325.2|	HCFC1	|HCFC1|3054|P51610|host cell factor 1 [Homo sapiens]	NGPPPCPR	NGPPPC[+418.1]PR	NGPPPC#PR	628.271	2	C135	53.78	484102416	-0.123137	BTD
NP_001153706.1|	ATP1A1	|ATP1A1|476|P05023;B7Z3U6|sodium/potassium-transporting ATPase subunit alpha-1 isoform d [Homo sapiens]	NIAFFSTNCVEGTAR	NIAFFSTNC[+418.1]VEGTAR	NIAFFSTNC#VEGTAR	1024.45	2	C218	77.07	123807880	-0.293795	BTD
NP_003741.1|	EIF3A	|EIF3A|8661|Q14152|eukaryotic translation initiation factor 3 subunit A [Homo sapiens]	NICQQVNIK	NIC[+418.1]QQVNIK	NIC#QQVNIK	739.35	2	C78	63.45	629032640	-0.0544893	BTD
NP_078856.4|	EFTUD1	|EFTUD1|79631|Q7Z2Z2|elongation factor Tu GTP-binding domain-containing protein 1 isoform 1 [Homo sapiens]	NICVLAHVDHGK	NIC[+418.1]VLAHVDHGK	NIC#VLAHVDHGK	575.273	3	C23	65.5	279773200	-0.21992	BTD
NP_061832.2|	DAZAP1	|DAZAP1|26528|Q96EP5|DAZ-associated protein 1 isoform b [Homo sapiens]	NIDPKPCTPR	NIDPKPC[+418.1]TPR	NIDPKPC#TPR	779.861	2	C85	50.68	338027008	-0.192328	BTD
NP_061832.2|	DAZAP1	|DAZAP1|26528|Q96EP5|DAZ-associated protein 1 isoform b [Homo sapiens]	NIDPKPCTPR	NIDPKPC[+418.1]TPR	NIDPKPC#TPR	520.243	3	C85	50.68	1921261568	0.557591	BTD
NP_008835.5|	PRKDC	|PRKDC|5591|P78527|DNA-dependent protein kinase catalytic subunit isoform 1 [Homo sapiens]	NILEESLCELVAK	NILEESLC[+418.1]ELVAK	NILEESLC#ELVAK	939.952	2	C2342	92.57	53084132	-0.327295	BTD
NP_008835.5|	PRKDC	|PRKDC|5591|P78527|DNA-dependent protein kinase catalytic subunit isoform 1 [Homo sapiens]	NILEESLCELVAK	NILEESLC[+418.1]ELVAK	NILEESLC#ELVAK	626.971	3	C2342	92.57	46307264	-0.330504	BTD
NP_001073917.2|	EPHA6	|EPHA6|285220|B3KS12|ephrin type-A receptor 6 isoform a [Homo sapiens]	NILVNSNLVCK	NILVNSNLVC[+418.1]K	NILVNSNLVC#K	817.905	2	C906	71.74	303471856	-0.208695	BTD
NP_001073917.2|	EPHA6	|EPHA6|285220|B3KS12|ephrin type-A receptor 6 isoform a [Homo sapiens]	NILVNSNLVCK	NILVNSNLVC[+418.1]K	NILVNSNLVC#K	545.606	3	C906	71.74	137611408	-0.287257	BTD
NP_006576.2|	CCT8	|CCT8|10694|P50990|T-complex protein 1 subunit theta [Homo sapiens]	NIQACK	NIQAC[+418.1]K	NIQAC#K	547.742	2	C36	51.64	749145984	0.00240385	BTD
NP_006810.1|	STIP1	|STIP1|10963|P31948|stress-induced-phosphoprotein 1 [Homo sapiens]	NKGNECFQK	NKGNEC[+418.1]FQK	NKGNEC#FQK	743.316	2	C370	47.88	142835844	-0.284783	BTD
NP_003791.3|	RNGTT	|RNGTT|8732|O60942|mRNA-capping enzyme [Homo sapiens]	NKPFFDICTSR	NKPFFDIC[+418.1]TSR	NKPFFDIC#TSR	582.597	3	C419	70.8	177659184	-0.268288	BTD
NP_055718.4|	NAV3	|NAV3|89795|Q8IVL0|neuron navigator 3 [Homo sapiens]	NKVCTEKPVK	NKVC[+418.1]TEKPVK	NKVC#TEKPVK	521.927	3	C479	37.87	125218888	-0.293127	BTD
NP_002071.2|	GOT2	|GOT2|2806|P00505|aspartate aminotransferase, mitochondrial precursor [Homo sapiens]	NLDKEYLPIGGLAEFCK	NLDKEYLPIGGLAEFC[+418.1]K	NLDKEYLPIGGLAEFC#K	776.706	3	C106	83.96	138325352	-0.286919	BTD
NP_064502.9|	LARS	|LARS|51520|Q9P2J5|leucine--tRNA ligase, cytoplasmic [Homo sapiens]	NLETFCEETRR	NLETFC[+418.1]EETRR	NLETFC#EETRR	605.931	3	C554	63.32	771114880	0.0128097	BTD
NP_001186128.1|	AK2	|AK2|204|P54819|adenylate kinase 2, mitochondrial isoform c [Homo sapiens]	NLETPLCK	NLETPLC[+418.1]K	NLETPLC#K	668.307	2	C92	67.64	337898504	-0.192389	BTD
NP_001307.2|	CSE1L	|CSE1L|1434|P55060|exportin-2 isoform 1 [Homo sapiens]	NLFEDQNTLTSICEK	NLFEDQNTLTSIC[+418.1]EK	NLFEDQNTLTSIC#EK	724.991	3	C344	78.9	142321136	-0.285026	BTD
NP_001032360.1|	EIF3B	|EIF3B|8662|P55884|eukaryotic translation initiation factor 3 subunit B [Homo sapiens]	NLFNVVDCK	NLFNVVDC[+418.1]K	NLFNVVDC#K	490.557	3	C515	76.07	89380016	-0.310103	BTD
NP_005989.3|	CCT3	|CCT3|7203|P49368;B3KX11;Q59H77|T-complex protein 1 subunit gamma isoform a [Homo sapiens]	NLQDAMQVCR	NLQDAM[+16]QVC[+418.1]R	NLQDAMQVC#R	806.339	2	C398	57.09	151593128	-0.280635	BTD
NP_064508.3|	TM9SF3	|TM9SF3|56889|Q9HD45|transmembrane 9 superfamily member 3 precursor [Homo sapiens]	NLSGQPNFPCR	NLSGQPNFPC[+418.1]R	NLSGQPNFPC#R	825.861	2	C428	65.13	1557057152	0.385081	BTD
NP_003555.1|	TAGLN2	|TAGLN2|8407|P37802;E9KL39|transgelin-2 [Homo sapiens]	NMACVQR	NM[+16]AC[+418.1]VQR	NMAC#VQR	628.254	2	C124	47.48	473071264	-0.128362	BTD
NP_003312.3|	TUFM	|TUFM|7284|P49411|elongation factor Tu, mitochondrial precursor [Homo sapiens]	NMITGTAPLDGCILVVAANDGPMPQTR	NM[+16]ITGTAPLDGC[+418.1]ILVVAANDGPM[+16]PQTR	NMITGTAPLDGC#ILVVAANDGPMPQTR	1069.16	3	C150	84.38	271437064	-0.223869	BTD
NP_055423.1|	CYFIP1	|CYFIP1|23191|Q7L576|cytoplasmic FMR1-interacting protein 1 isoform a [Homo sapiens]	NMKCSVK	NM[+16]KC[+418.1]SVK	NMKC#SVK	415.18	3	C179	40.25	347070880	-0.188044	BTD
NP_006078.2|	TUBB4A	|TUBB4A|10382|P04350|tubulin beta-4A chain [Homo sapiens]	NMMAACDPR	NM[+16]MAAC[+418.1]DPR	NMMAAC#DPR	721.77	2	C303	54.35	353287072	2.10671	BTD
NP_006078.2|	TUBB4A	|TUBB4A|10382|P04350|tubulin beta-4A chain [Homo sapiens]	NMMAACDPR	NM[+16]M[+16]AAC[+418.1]DPR	NMMAAC#DPR	729.767	2	C303	48.81	5191773184	-0.1851	BTD
NP_006078.2|	TUBB4A	|TUBB4A|10382|P04350|tubulin beta-4A chain [Homo sapiens]	NMMAACDPR	NM[+16]M[+16]AAC[+418.1]DPR	NMMAAC#DPR	486.847	3	C303	48.81	2977004416	1.05766	BTD
NP_001006.1|	RPS11	|RPS11|6205|P62280|40S ribosomal protein S11 [Homo sapiens]	NMSVHLSPCFR	NM[+16]SVHLSPC[+418.1]FR	NMSVHLSPC#FR	862.871	2	C116	63.1	445307680	-0.141513	BTD
NP_001006.1|	RPS11	|RPS11|6205|P62280|40S ribosomal protein S11 [Homo sapiens]	NMSVHLSPCFR	NM[+16]SVHLSPC[+418.1]FR	NMSVHLSPC#FR	575.583	3	C116	63.1	1329421568	0.277259	BTD
NP_958929.1|	KLC4	|KLC4|89953|Q9NSK0|kinesin light chain 4 isoform a [Homo sapiens]	NNLASCYLK	NNLASC[+418.1]YLK	NNLASC#YLK	722.323	2	C388	65.82	175646864	-0.269241	BTD
NP_004588.1|	SNRPD2	|SNRPD2|6633|P62316|small nuclear ribonucleoprotein Sm D2 isoform 1 [Homo sapiens]	NNTQVLINCR	NNTQVLINC[+418.1]R	NNTQVLINC#R	796.869	2	C46	63.2	1849048448	0.523386	BTD
NP_004588.1|	SNRPD2	|SNRPD2|6633|P62316|small nuclear ribonucleoprotein Sm D2 isoform 1 [Homo sapiens]	NNTQVLINCR	NNTQVLINC[+418.1]R	NNTQVLINC#R	531.582	3	C46	63.2	1665427456	0.436412	BTD
NP_006827.1|	GCN1L1	|GCN1L1|10985|Q92616|translational activator GCN1 [Homo sapiens]	NPFLSLAACVMPSR	NPFLSLAAC[+418.1]VM[+16]PSR	NPFLSLAAC#VMPSR	647.3	3	C907	84.84	119173048	-0.295991	BTD
NP_003791.3|	RNGTT	|RNGTT|8732|O60942|mRNA-capping enzyme [Homo sapiens]	NPPELIGVHCTHGFNR	NPPELIGVHC[+418.1]THGFNR	NPPELIGVHC#THGFNR	737.007	3	C126	60.95	670924128	-0.0346469	BTD
NP_003791.3|	RNGTT	|RNGTT|8732|O60942|mRNA-capping enzyme [Homo sapiens]	NPPELIGVHCTHGFNR	NPPELIGVHC[+418.1]THGFNR	NPPELIGVHC#THGFNR	553.007	4	C126	60.95	344782320	-0.189128	BTD
NP_004930.1|	DDX1	|DDX1|1653|Q92499;A3RJH1|ATP-dependent RNA helicase DDX1 [Homo sapiens]	NQALFPACVLK	NQALFPAC[+418.1]VLK	NQALFPAC#VLK	811.397	2	C231	81.07	118433100	-0.296341	BTD
NP_002009.1|	FLII	|FLII|2314|Q13045|protein flightless-1 homolog isoform 1 [Homo sapiens]	NQLTSLPSAICK	NQLTSLPSAIC[+418.1]K	NQLTSLPSAIC#K	846.908	2	C289	73.86	134585684	-0.28869	BTD
NP_002009.1|	FLII	|FLII|2314|Q13045|protein flightless-1 homolog isoform 1 [Homo sapiens]	NQLTSLPSAICK	NQLTSLPSAIC[+418.1]K	NQLTSLPSAIC#K	564.941	3	C289	73.86	114378976	-0.298261	BTD
NP_000981.1|	RPL27A	|RPL27A|6157|P46776|60S ribosomal protein L27a [Homo sapiens]	NQSFCPTVNLDK	NQSFC[+418.1]PTVNLDK	NQSFC#PTVNLDK	892.393	2	C70	71.63	1353606016	0.288714	BTD
NP_000981.1|	RPL27A	|RPL27A|6157|P46776|60S ribosomal protein L27a [Homo sapiens]	NQSFCPTVNLDK	NQSFC[+418.1]PTVNLDK	NQSFC#PTVNLDK	595.264	3	C70	71.63	899860992	0.0737919	BTD
NP_060230.5|	NCAPG2	|NCAPG2|54892|Q86XI2|condensin-2 complex subunit G2 [Homo sapiens]	NRECLLSAPR	NREC[+418.1]LLSAPR	NREC#LLSAPR	788.872	2	C776	62.33	362606128	-0.180686	BTD
NP_060230.5|	NCAPG2	|NCAPG2|54892|Q86XI2|condensin-2 complex subunit G2 [Homo sapiens]	NRECLLSAPR	NREC[+418.1]LLSAPR	NREC#LLSAPR	526.25	3	C776	62.33	333047872	-0.194686	BTD
NP_002256.2|	KPNB1	|KPNB1|3837|Q14974|importin subunit beta-1 [Homo sapiens]	NSAKDCYPAVQK	NSAKDC[+418.1]YPAVQK	NSAKDC#YPAVQK	581.261	3	C543	51.31	1635428480	0.422203	BTD
NP_003696.2|	SLC25A12	|SLC25A12|8604|O75746|calcium-binding mitochondrial carrier protein Aralar1 [Homo sapiens]	NSFDCFKK	NSFDC[+418.1]FKK	NSFDC#FKK	703.797	2	C375	57.77	162743744	-0.275353	BTD
NP_003696.2|	SLC25A12	|SLC25A12|8604|O75746|calcium-binding mitochondrial carrier protein Aralar1 [Homo sapiens]	NSFDCFKK	NSFDC[+418.1]FKK	NSFDC#FKK	469.534	3	C375	57.77	404017440	-0.161071	BTD
NP_001448.2|	FLNB	|FLNB|2317|O75369|filamin-B isoform 2 [Homo sapiens]	NSHCVR	NSHC[+418.1]VR	NSHC#VR	378.492	3	C2154	41.66	206090888	-0.254821	BTD
NP_002645.3|	PKM	|PKM|5315|P14618|pyruvate kinase isozymes M1/M2 isoform a [Homo sapiens]	NTGIICTIGPASR	NTGIIC[+418.1]TIGPASR	NTGIIC#TIGPASR	860.911	2	C49	70.58	1142326432	0.188639	BTD
NP_002645.3|	PKM	|PKM|5315|P14618|pyruvate kinase isozymes M1/M2 isoform a [Homo sapiens]	NTGIICTIGPASR	NTGIIC[+418.1]TIGPASR	NTGIIC#TIGPASR	574.276	3	C49	70.58	593863872	-0.0711475	BTD
NP_001181885.1|	MATR3	|MATR3|9782|P43243|matrin-3 isoform b [Homo sapiens]	NTHCSSLPHYQK	NTHC[+418.1]SSLPHYQK	NTHC#SSLPHYQK	611.6	3	C533	45.7	419704448	-0.15364	BTD
NP_001181885.1|	MATR3	|MATR3|9782|P43243|matrin-3 isoform b [Homo sapiens]	NTHCSSLPHYQK	NTHC[+418.1]SSLPHYQK	NTHC#SSLPHYQK	458.952	4	C533	45.7	647895424	-0.0455547	BTD
NP_001242941.1|	MYH10	|MYH10|4628|P35580;F8VTL3;G1UI33;Q4LE45;Q9BWG0|myosin-10 isoform 1 [Homo sapiens]	NTNPNFVRCIIPNHEK	NTNPNFVRC[+418.1]IIPNHEK	NTNPNFVRC#IIPNHEK	772.033	3	C709	63.7	299628064	-0.210516	BTD
NP_004448.2|	ACSL3	|ACSL3|2181|O95573;B3KMA6|long-chain-fatty-acid--CoA ligase 3 [Homo sapiens]	NTPLCDSFVFR	NTPLC[+418.1]DSFVFR	NTPLC#DSFVFR	858.879	2	C429	81.1	183261560	-0.265634	BTD
NP_004448.2|	ACSL3	|ACSL3|2181|O95573;B3KMA6|long-chain-fatty-acid--CoA ligase 3 [Homo sapiens]	NTPLCDSFVFR	NTPLC[+418.1]DSFVFR	NTPLC#DSFVFR	572.922	3	C429	81.1	72890172	-0.317913	BTD
NP_005490.1|	UBA2	|UBA2|10054|Q9UBT2|SUMO-activating enzyme subunit 2 [Homo sapiens]	NTPSEPIHCIVWAK	NTPSEPIHC[+418.1]IVWAK	NTPSEPIHC#IVWAK	671.65	3	C185	71.2	85819044	-0.311789	BTD
NP_067026.3|	SRPRB	|SRPRB|58477|Q9Y5M8;Q549N5|signal recognition particle receptor subunit beta [Homo sapiens]	NTPSFLIACNK	NTPSFLIAC[+418.1]NK	NTPSFLIAC#NK	813.376	2	C179	73.19	490008272	-0.12034	BTD
NP_005975.1|	SLC25A1	|SLC25A1|6576|P53007|tricarboxylate transport protein, mitochondrial isoform a precursor [Homo sapiens]	NTWDCGLQILK	NTWDC[+418.1]GLQILK	NTWDC#GLQILK	854.895	2	C262	81.08	98432800	-0.305815	BTD
NP_056271.2|	COBRA1	|COBRA1|25920|Q8WX92|negative elongation factor B [Homo sapiens]	NVHYCTLR	NVHYC[+418.1]TLR	NVHYC#TLR	712.316	2	C235	55.64	161778896	-0.27581	BTD
NP_056271.2|	COBRA1	|COBRA1|25920|Q8WX92|negative elongation factor B [Homo sapiens]	NVHYCTLR	NVHYC[+418.1]TLR	NVHYC#TLR	475.213	3	C235	55.64	357935424	-0.182898	BTD
NP_065171.2|	DOLPP1	|DOLPP1|57171|Q86YN1|dolichyldiphosphatase 1 isoform a [Homo sapiens]	NVIQEPRPCGGPHTAVGTK	NVIQEPRPC[+418.1]GGPHTAVGTK	NVIQEPRPC#GGPHTAVGTK	595.539	4	C86	50.03	334573728	-0.193963	BTD
NP_733765.1|	ATP2A2	|ATP2A2|488|P16615|sarcoplasmic/endoplasmic reticulum calcium ATPase 2 isoform b [Homo sapiens]	NYLEPGKECVQPATK	NYLEPGKEC[+418.1]VQPATK	NYLEPGKEC#VQPATK	1047.98	2	C997	56.15	128219192	-0.291706	BTD
NP_733765.1|	ATP2A2	|ATP2A2|488|P16615|sarcoplasmic/endoplasmic reticulum calcium ATPase 2 isoform b [Homo sapiens]	NYLEPGKECVQPATK	NYLEPGKEC[+418.1]VQPATK	NYLEPGKEC#VQPATK	698.992	3	C997	56.15	1050030912	0.144922	BTD
NP_002464.1|	MYH9	|MYH9|4627|P35579;Q60FE2|myosin-9 [Homo sapiens]	QACVLMIK	QAC[+418.1]VLM[+16]IK	QAC#VLMIK	670.314	2	C740	70.65	850367008	0.0503485	BTD
NP_001007.2|	RPS12	|RPS12|6206|P25398|40S ribosomal protein S12 [Homo sapiens]	QAHLCVLASNCDEPMYVK	QAHLC[+418.1]VLASNC[+57]DEPM[+16]YVK	QAHLC#VLASNCDEPMYVK	838.03	3	C50	67.95	353417248	-0.185038	BTD
NP_000976.1|	RPL17	|RPL17|6139|P18621|60S ribosomal protein L17 isoform a [Homo sapiens]	QCVPFR	QC[+418.1]VPFR	QC#VPFR	584.257	2	C57	64.88	239293656	-0.239094	BTD
NP_008835.5|	PRKDC	|PRKDC|5591|P78527|DNA-dependent protein kinase catalytic subunit isoform 1 [Homo sapiens]	QCLPSLDLSCK	QC[+57]LPSLDLSC[+418.1]K	QCLPSLDLSC#K	841.373	2	C1507	72.92	243218048	-0.237235	BTD
NP_008835.5|	PRKDC	|PRKDC|5591|P78527|DNA-dependent protein kinase catalytic subunit isoform 1 [Homo sapiens]	QCLPSLDLSCK	QC[+57]LPSLDLSC[+418.1]K	QCLPSLDLSC#K	561.251	3	C1507	72.92	142373392	-0.285002	BTD
NP_612632.1|	CTTN	|CTTN|2017|Q14247;Q53HG7|src substrate cortactin isoform b [Homo sapiens]	QDKCALGWDHQEK	QDKC[+418.1]ALGWDHQEK	QDKC#ALGWDHQEK	494.716	4	C246	54.84	82954420	-0.313146	BTD
NP_004332.2|	CAD	|CAD|790|P27708|CAD protein [Homo sapiens]	QELGICPAVK	QELGIC[+418.1]PAVK	QELGIC#PAVK	738.355	2	C897	69.76	342573856	-0.190174	BTD
NP_004332.2|	CAD	|CAD|790|P27708|CAD protein [Homo sapiens]	QELGICPAVK	QELGIC[+418.1]PAVK	QELGIC#PAVK	492.572	3	C897	69.76	73769316	-0.317497	BTD
NP_000173.2|	HADHA	|HADHA|3030|P40939;E9KL44|trifunctional enzyme subunit alpha, mitochondrial precursor [Homo sapiens]	QFTPCQLLADHANSPNK	QFTPC[+418.1]QLLADHANSPNK	QFTPC#QLLADHANSPNK	768.018	3	C747	69.98	110965672	-0.299878	BTD
NP_005947.3|	MTHFD1	|MTHFD1|4522|P11586;G3V2B8|C-1-tetrahydrofolate synthase, cytoplasmic [Homo sapiens]	QGFGNLPICMAK	QGFGNLPIC[+418.1]M[+16]AK	QGFGNLPIC#MAK	856.883	2	C863	74.02	300766848	-0.209977	BTD
NP_005947.3|	MTHFD1	|MTHFD1|4522|P11586;G3V2B8|C-1-tetrahydrofolate synthase, cytoplasmic [Homo sapiens]	QGFGNLPICMAK	QGFGNLPIC[+418.1]M[+16]AK	QGFGNLPIC#MAK	571.591	3	C863	74.02	99337060	-0.305386	BTD
NP_001092090.1|	PCBP2	|PCBP2|5094|Q15366|poly(rC)-binding protein 2 isoform c [Homo sapiens]	QICVVMLESPPK	QIC[+418.1]VVM[+16]LESPPK	QIC#VVMLESPPK	889.42	2	C163	72.97	94839384	-0.307517	BTD
NP_057107.3|	OTUD6B	|OTUD6B|51633|Q8N6M0|OTU domain-containing protein 6B [Homo sapiens]	QIPSDGHCMYK	QIPSDGHC[+418.1]M[+16]YK	QIPSDGHC#MYK	571.567	3	C188	48.72	460836576	-0.134158	BTD
NP_006576.2|	CCT8	|CCT8|10694|P50990|T-complex protein 1 subunit theta [Homo sapiens]	QITSYGETCPGLEQYAIK	QITSYGETC[+418.1]PGLEQYAIK	QITSYGETC#PGLEQYAIK	807.036	3	C430	73.12	61490424	-0.323313	BTD
NP_036350.2|	ILF3	|ILF3|3609|Q12906|interleukin enhancer-binding factor 3 isoform a [Homo sapiens]	QKCLAALASLR	QKC[+418.1]LAALASLR	QKC#LAALASLR	796.408	2	C203	69.98	172932824	-0.270527	BTD
NP_036350.2|	ILF3	|ILF3|3609|Q12906|interleukin enhancer-binding factor 3 isoform a [Homo sapiens]	QKCLAALASLR	QKC[+418.1]LAALASLR	QKC#LAALASLR	531.274	3	C203	69.98	765396288	0.010101	BTD
NP_008835.5|	PRKDC	|PRKDC|5591|P78527|DNA-dependent protein kinase catalytic subunit isoform 1 [Homo sapiens]	QKVCLDIIYK	QKVC[+418.1]LDIIYK	QKVC#LDIIYK	820.912	2	C2435	67.93	202739400	-0.256408	BTD
NP_008835.5|	PRKDC	|PRKDC|5591|P78527|DNA-dependent protein kinase catalytic subunit isoform 1 [Homo sapiens]	QKVCLDIIYK	QKVC[+418.1]LDIIYK	QKVC#LDIIYK	547.611	3	C2435	67.93	424879216	-0.151189	BTD
NP_009103.2|	NUP50	|NUP50|10762|Q9UKX7|nuclear pore complex protein Nup50 isoform b [Homo sapiens]	QLAALNCSVR	QLAALNC[+418.1]SVR	QLAALNC#SVR	746.855	2	C165	65.6	245994424	-0.23592	BTD
NP_003267.1|	TMPO	|TMPO|7112|P42166|thymopoietin isoform alpha [Homo sapiens]	QLPSLACK	QLPSLAC[+418.1]K	QLPSLAC#K	639.304	2	C518	65.95	473352688	-0.128229	BTD
NP_006827.1|	GCN1L1	|GCN1L1|10985|Q92616|translational activator GCN1 [Homo sapiens]	QLSSCLPNIVPK	QLSSC[+418.1]LPNIVPK	QLSSC#LPNIVPK	858.926	2	C1535	76.94	103574620	-0.303379	BTD
NP_004921.1|	CAPZB	|CAPZB|832|P47756;Q7L4N0|F-actin-capping protein subunit beta isoform 1 [Homo sapiens]	QMEKDETVSDCSPHIANIGR	QM[+16]EKDETVSDC[+418.1]SPHIANIGR	QMEKDETVSDC#SPHIANIGR	888.721	3	C206	55.87	398445216	-0.16371	BTD
NP_004921.1|	CAPZB	|CAPZB|832|P47756;Q7L4N0|F-actin-capping protein subunit beta isoform 1 [Homo sapiens]	QMEKDETVSDCSPHIANIGR	QM[+16]EKDETVSDC[+418.1]SPHIANIGR	QMEKDETVSDC#SPHIANIGR	666.793	4	C206	55.87	1094747264	0.166102	BTD
NP_714913.1|	ELMOD2	|ELMOD2|255520|Q8IZ81|ELMO domain-containing protein 2 [Homo sapiens]	QMTGKCELQR	QM[+16]TGKC[+418.1]ELQR	QMTGKC#ELQR	814.355	2	C29	47.46	133847232	-0.28904	BTD
NP_714913.1|	ELMOD2	|ELMOD2|255520|Q8IZ81|ELMO domain-containing protein 2 [Homo sapiens]	QMTGKCELQR	QM[+16]TGKC[+418.1]ELQR	QMTGKC#ELQR	543.239	3	C29	47.46	770309280	0.0124281	BTD
NP_004701.1|	SYNGR2	|SYNGR2|9144|O43760|synaptogyrin-2 [Homo sapiens]	QMYCVFNR	QM[+16]YC[+418.1]VFNR	QMYC#VFNR	747.802	2	C59	68.79	1067898784	0.153385	BTD
NP_004701.1|	SYNGR2	|SYNGR2|9144|O43760|synaptogyrin-2 [Homo sapiens]	QMYCVFNR	QM[+16]YC[+418.1]VFNR	QMYC#VFNR	498.87	3	C59	68.79	108304376	-0.301139	BTD
NP_056450.2|	GAPVD1	|GAPVD1|26130|Q14C86;B3KN67|GTPase-activating protein and VPS9 domain-containing protein 1 [Homo sapiens]	QNTYCFPHSLR	QNTYC[+418.1]FPHSLR	QNTYC#FPHSLR	595.261	3	C275	63.43	258950496	-0.229783	BTD
NP_009089.4|	CSDE1	|CSDE1|7812|O75534|cold shock domain-containing protein E1 isoform 2 [Homo sapiens]	QRPGQQVATCVR	QRPGQQVATC[+418.1]VR	QRPGQQVATC#VR	587.615	3	C475	49.99	271260896	-0.223952	BTD
NP_002806.2|	PSMD11	|PSMD11|5717|O00231|26S proteasome non-ATPase regulatory subunit 11 [Homo sapiens]	QTEALKCVAQASK	QTEALKC[+418.1]VAQASK	QTEALKC#VAQASK	897.929	2	C289	55.05	133769688	-0.289077	BTD
NP_002806.2|	PSMD11	|PSMD11|5717|O00231|26S proteasome non-ATPase regulatory subunit 11 [Homo sapiens]	QTEALKCVAQASK	QTEALKC[+418.1]VAQASK	QTEALKC#VAQASK	598.955	3	C289	55.05	364350736	-0.179859	BTD
NP_005993.1|	UCHL3	|UCHL3|7347|P15374|ubiquitin carboxyl-terminal hydrolase isozyme L3 [Homo sapiens]	QTISNACGTIGLIHAIANNK	QTISNAC[+418.1]GTIGLIHAIANNK	QTISNAC#GTIGLIHAIANNK	819.739	3	C95	77.96	301143232	-0.209798	BTD
NP_009109.3|	STRAP	|STRAP|11171|Q9Y3F4|serine-threonine kinase receptor-associated protein [Homo sapiens]	QTPLTCSGHTR	QTPLTC[+418.1]SGHTR	QTPLTC#SGHTR	540.242	3	C10	48.95	89448536	-0.31007	BTD
NP_078938.2|	NAT10	|NAT10|55226|Q9H0A0|N-acetyltransferase 10 isoform a [Homo sapiens]	QTPNDLTGEHSCIMLK	QTPNDLTGEHSC[+418.1]IM[+16]LK	QTPNDLTGEHSC#IMLK	740.996	3	C746	61.64	826261344	0.0389305	BTD
NP_064502.9|	LARS	|LARS|51520|Q9P2J5|leucine--tRNA ligase, cytoplasmic [Homo sapiens]	QTSQCLK	QTSQC[+418.1]LK	QTSQC#LK	613.271	2	C546	52.01	330098496	-0.196083	BTD
NP_055874.2|	TLN2	|TLN2|83660|Q9Y4G6|talin-2 [Homo sapiens]	QVAASTAQLLVACK	QVAASTAQLLVAC[+418.1]K	QVAASTAQLLVAC#K	607.639	3	C2443	73.16	86422088	-0.311504	BTD
NP_001013003.1|	C1orf31	|C1orf31|388753|Q5JTJ3|uncharacterized protein C1orf31 isoform 1 [Homo sapiens]	QVCWGAR	QVC[+418.1]WGAR	QVC#WGAR	619.266	2	C58	63.21	109579068	-0.300535	BTD
NP_001010.2|	RPS15A	|RPS15A|6210|P62244;B2R4W8|40S ribosomal protein S15a [Homo sapiens]	QVLIRPCSK	QVLIRPC[+418.1]SK	QVLIRPC#SK	731.371	2	C30	55.69	1016301312	0.128945	BTD
NP_001010.2|	RPS15A	|RPS15A|6210|P62244;B2R4W8|40S ribosomal protein S15a [Homo sapiens]	QVLIRPCSK	QVLIRPC[+418.1]SK	QVLIRPC#SK	487.916	3	C30	55.69	4125601408	1.6017	BTD
NP_056461.1|	RAP1B	|RAP1B|5908|P61224|ras-related protein Rap-1b isoform 1 precursor [Homo sapiens]	QWNNCAFLESSAK	QWNNC[+418.1]AFLESSAK	QWNNC#AFLESSAK	958.409	2	C141	71.88	66957228	-0.320723	BTD
NP_001613.2|	AHSG	|AHSG|197|P02765|alpha-2-HS-glycoprotein preproprotein [Homo sapiens]	QYGFCK	QYGFC[+418.1]K	QYGFC#K	582.236	2	C230	62.89	155328104	-0.278865	BTD
NP_055791.1|	PDCD11	|PDCD11|22984|Q14690|protein RRP5 homolog [Homo sapiens]	QYQAGQTVTCFLK	QYQAGQTVTC[+418.1]FLK	QYQAGQTVTC#FLK	952.937	2	C1154	74.12	46501898	-0.330412	BTD
NP_055791.1|	PDCD11	|PDCD11|22984|Q14690|protein RRP5 homolog [Homo sapiens]	QYQAGQTVTCFLK	QYQAGQTVTC[+418.1]FLK	QYQAGQTVTC#FLK	635.627	3	C1154	74.12	42532502	-0.332292	BTD
NP_061184.1|	COG1	|COG1|9382|Q8WTW3|conserved oligomeric Golgi complex subunit 1 [Homo sapiens]	RCAVGLVDAVK	RC[+418.1]AVGLVDAVK	RC#AVGLVDAVK	516.927	3	C72	63.76	85866180	-0.311767	BTD
NP_060206.2|	THUMPD1	|THUMPD1|55623|Q9NXG2;Q6MZT3|THUMP domain-containing protein 1 [Homo sapiens]	RCDAGGPR	RC[+418.1]DAGGPR	RC#DAGGPR	417.178	3	C31	40.34	630064064	-0.0540008	BTD
NP_112487.1|	SLIRP	|SLIRP|81892|Q9GZT3|SRA stem-loop-interacting RNA-binding protein, mitochondrial isoform 1 [Homo sapiens]	RCILPFDK	RC[+418.1]ILPFDK	RC#ILPFDK	470.562	3	C48	72.5	786106016	0.0199104	BTD
NP_110395.1|	ILKAP	|ILKAP|80895|Q9H0C8|integrin-linked kinase-associated serine/threonine phosphatase 2C [Homo sapiens]	RCLLDTFK	RC[+418.1]LLDTFK	RC#LLDTFK	471.893	3	C190	75.88	82421928	-0.313398	BTD
NP_001952.1|	EEF2	|EEF2|1938|P13639|elongation factor 2 [Homo sapiens]	RCLYASVLTAQPR	RC[+418.1]LYASVLTAQPR	RC#LYASVLTAQPR	632.647	3	C728	68.92	1071534688	0.155107	BTD
NP_110395.1|	ILKAP	|ILKAP|80895|Q9H0C8|integrin-linked kinase-associated serine/threonine phosphatase 2C [Homo sapiens]	RCQLTPNDR	RC[+418.1]QLTPNDR	RC#QLTPNDR	507.563	3	C312	50.75	178723472	-0.267784	BTD
NP_001230106.1|	ALDOA	|ALDOA|226|P04075|fructose-bisphosphate aldolase A isoform 2 [Homo sapiens]	RCQYVTEK	RC[+418.1]QYVTEK	RC#QYVTEK	482.216	3	C256	47.17	4412364544	1.73753	BTD
NP_055117.1|	SEC61G	|SEC61G|23480|P60059|protein transport protein Sec61 subunit gamma [Homo sapiens]	RCTKPDR	RC[+418.1]TKPDR	RC#TKPDR	431.866	3	C25	30.3	4335340928	1.70105	BTD
NP_055117.1|	SEC61G	|SEC61G|23480|P60059|protein transport protein Sec61 subunit gamma [Homo sapiens]	RCTKPDR	RC[+418.1]TKPDR	RC#TKPDR	324.151	4	C25	30.3	1388699392	0.305336	BTD
NP_001180345.1|	DDX3X	|DDX3X|1654|-|ATP-dependent RNA helicase DDX3X isoform 2 [Homo sapiens]	RDLMACAQTGSGK	RDLM[+16]AC[+418.1]AQTGSGK	RDLMAC#AQTGSGK	591.257	3	C223	47.27	174438240	-0.269814	BTD
NP_004850.1|	CLTC	|CLTC|1213|Q00610|clathrin heavy chain 1 [Homo sapiens]	RDPHLACVAYER	RDPHLAC[+418.1]VAYER	RDPHLAC#VAYER	616.615	3	C918	54.11	569102240	-0.0828761	BTD
NP_008938.2|	CPSF6	|CPSF6|11052|Q16630|cleavage and polyadenylation specificity factor subunit 6 [Homo sapiens]	RELHGQNPVVTPCNK	RELHGQNPVVTPC[+418.1]NK	RELHGQNPVVTPC#NK	704.003	3	C159	48.2	294755160	-0.212824	BTD
NP_008938.2|	CPSF6	|CPSF6|11052|Q16630|cleavage and polyadenylation specificity factor subunit 6 [Homo sapiens]	RELHGQNPVVTPCNK	RELHGQNPVVTPC[+418.1]NK	RELHGQNPVVTPC#NK	528.254	4	C159	48.2	327793888	-0.197175	BTD
NP_115521.3|	FBXO30	|FBXO30|84085|Q8TB52|F-box only protein 30 [Homo sapiens]	RFCPSIQGAK	RFC[+418.1]PSIQGAK	RFC#PSIQGAK	508.908	3	C570	56.88	140701920	-0.285793	BTD
NP_000959.2|	RPL4	|RPL4|6124|P36578|60S ribosomal protein L4 [Homo sapiens]	RGPCIIYNEDNGIIK	RGPC[+418.1]IIYNEDNGIIK	RGPC#IIYNEDNGIIK	1062.01	2	C208	70.14	211938432	-0.252051	BTD
NP_000959.2|	RPL4	|RPL4|6124|P36578|60S ribosomal protein L4 [Homo sapiens]	RGPCIIYNEDNGIIK	RGPC[+418.1]IIYNEDNGIIK	RGPC#IIYNEDNGIIK	708.34	3	C208	70.14	1416744512	0.31862	BTD
NP_002964.3|	ATXN2	|ATXN2|6311|Q99700|ataxin-2 [Homo sapiens]	RGPEVTSQGVQTSSPACK	RGPEVTSQGVQTSSPAC[+418.1]K	RGPEVTSQGVQTSSPAC#K	750.681	3	C892	49.5	591157888	-0.0724292	BTD
NP_006627.2|	MTHFD2	|MTHFD2|10797|P13995|bifunctional methylenetetrahydrofolate dehydrogenase/cyclohydrolase, mitochondrial precursor [Homo sapiens]	RICNAVSPDK	RIC[+418.1]NAVSPDK	RIC#NAVSPDK	507.571	3	C145	49.2	98461968	-0.305801	BTD
NP_958929.1|	KLC4	|KLC4|89953|Q9NSK0|kinesin light chain 4 isoform a [Homo sapiens]	RLCQENQWLR	RLC[+418.1]QENQWLR	RLC#QENQWLR	588.608	3	C113	62.72	102205412	-0.304028	BTD
NP_060596.2|	TMEM33	|TMEM33|55161|P57088|transmembrane protein 33 [Homo sapiens]	RNPYCR	RNPYC[+418.1]R	RNPYC#R	409.511	3	C204	48.91	943941984	0.0946714	BTD
NP_054899.2|	MRPL22	|MRPL22|29093|Q9NWU5|39S ribosomal protein L22, mitochondrial isoform a [Homo sapiens]	RPAEIYHCR	RPAEIYHC[+418.1]R	RPAEIYHC#R	521.571	3	C70	46.14	286012128	-0.216965	BTD
NP_942131.1|	ACACA	|ACACA|31|Q13085;Q7Z5W8|acetyl-CoA carboxylase 1 isoform 1 [Homo sapiens]	RPGAALDPGCVLAK	RPGAALDPGC[+418.1]VLAK	RPGAALDPGC#VLAK	595.964	3	C850	65.1	684535616	-0.0281997	BTD
NP_064528.1|	PNO1	|PNO1|56902|Q9NRX1|RNA-binding protein PNO1 [Homo sapiens]	RPVFPPLCGDGLLSGK	RPVFPPLC[+418.1]GDGLLSGK	RPVFPPLC#GDGLLSGK	692.013	3	C64	78.85	628363520	-0.0548063	BTD
NP_055844.2|	POP1	|POP1|10940|Q99575;Q96F88|ribonucleases P/MRP protein subunit POP1 [Homo sapiens]	RSEVPCAPMPK	RSEVPC[+418.1]APM[+16]PK	RSEVPC#APMPK	550.248	3	C745	52.65	135653500	-0.288185	BTD
NP_004125.3|	HSPA9	|HSPA9|3313|P38646|stress-70 protein, mitochondrial precursor [Homo sapiens]	RTIAPCQK	RTIAPC[+418.1]QK	RTIAPC#QK	445.55	3	C366	47.83	112036040	-0.299371	BTD
NP_001012.1|	RPS17	|RPS17|6218|P0CW22;P08708|40S ribosomal protein S17 [Homo sapiens]	RVCEEIAIIPSK	RVC[+418.1]EEIAIIPSK	RVC#EEIAIIPSK	592.632	3	C35	64.8	177451584	-0.268386	BTD
NP_001012.1|	RPS17	|RPS17|6218|P0CW22;P08708|40S ribosomal protein S17 [Homo sapiens]	RVCEEIAIIPSKK	RVC[+418.1]EEIAIIPSKK	RVC#EEIAIIPSKK	635.33	3	C35	58.32	204253088	-0.255691	BTD
NP_005198.1|	CRKL	|CRKL|1399|P46109|crk-like protein [Homo sapiens]	RVPCAYDK	RVPC[+418.1]AYDK	RVPC#AYDK	685.305	2	C249	51.21	733844480	-0.0048439	BTD
NP_005198.1|	CRKL	|CRKL|1399|P46109|crk-like protein [Homo sapiens]	RVPCAYDK	RVPC[+418.1]AYDK	RVPC#AYDK	457.206	3	C249	51.21	666666752	-0.0366635	BTD
NP_055335.2|	MYBBP1A	|MYBBP1A|10514|Q9BQG0|myb-binding protein 1A isoform 2 [Homo sapiens]	RYCHDLGER	RYC[+418.1]HDLGER	RYC#HDLGER	522.891	3	C890	45.11	95300208	-0.307298	BTD
NP_000986.2|	RPL34	|RPL34|6164|P49207|60S ribosomal protein L34 [Homo sapiens]	SACGVCPGR	SAC[+418.1]GVC[+57]PGR	SAC#GVCPGR	662.765	2	C46	52.78	251924240	-0.233111	BTD
NP_000986.2|	RPL34	|RPL34|6164|P49207|60S ribosomal protein L34 [Homo sapiens]	SACGVCPGR	SAC[+57]GVC[+418.1]PGR	SACGVC#PGR	662.765	2	C49	55.02	147052136	-0.282785	BTD
NP_006363.4|	SYNCRIP	|SYNCRIP|10492|O60506|heterogeneous nuclear ribonucleoprotein Q isoform 1 [Homo sapiens]	SAFLCGVMK	SAFLC[+418.1]GVM[+16]K	SAFLC#GVMK	695.304	2	C96	68.22	1285485184	0.256448	BTD
NP_056991.2|	LAP3	|LAP3|51056|P28838|cytosol aminopeptidase [Homo sapiens]	SAGACTAAAFLK	SAGAC[+418.1]TAAAFLK	SAGAC#TAAAFLK	764.85	2	C462	71.54	559796928	-0.0872837	BTD
NP_056991.2|	LAP3	|LAP3|51056|P28838|cytosol aminopeptidase [Homo sapiens]	SAGACTAAAFLK	SAGAC[+418.1]TAAAFLK	SAGAC#TAAAFLK	510.236	3	C462	71.54	44258448	-0.331475	BTD
NP_001129477.1|	GART	|GART|2618|P22102|trifunctional purine biosynthetic protein adenosine-3 isoform 1 [Homo sapiens]	SAGVQCFGPTAEAAQLESSKR	SAGVQC[+418.1]FGPTAEAAQLESSKR	SAGVQC#FGPTAEAAQLESSKR	852.393	3	C93	65.67	231859784	-0.242615	BTD
NP_055204.2|	PELP1	|PELP1|27043|Q8IZL8|proline-, glutamic acid- and leucine-rich protein 1 [Homo sapiens]	SAPHLPGLMCLLR	SAPHLPGLM[+16]C[+418.1]LLR	SAPHLPGLMC#LLR	614.633	3	C71	78	177686920	-0.268275	BTD
NP_055744.2|	FASTKD2	|FASTKD2|22868|Q9NYY8|FAST kinase domain-containing protein 2 [Homo sapiens]	SAYCLGSSHPR	SAYC[+418.1]LGSSHPR	SAYC#LGSSHPR	532.563	3	C645	54.83	167775912	-0.272969	BTD
NP_006845.1|	KDELR2	|KDELR2|11014|P33947|ER lumen protein retaining receptor 2 isoform 1 [Homo sapiens]	SCAGISGK	SC[+418.1]AGISGK	SC#AGISGK	570.744	2	C29	52.57	874463392	0.061762	BTD
NP_001070674.1|	SEC31A	|SEC31A|22872|O94979|protein transport protein Sec31A isoform 4 [Homo sapiens]	SCATFSSSHR	SC[+418.1]ATFSSSHR	SC#ATFSSSHR	750.803	2	C60	50.1	49836450	-0.328833	BTD
NP_001070674.1|	SEC31A	|SEC31A|22872|O94979|protein transport protein Sec31A isoform 4 [Homo sapiens]	SCATFSSSHR	SC[+418.1]ATFSSSHR	SC#ATFSSSHR	500.871	3	C60	50.1	346999408	-0.188078	BTD
NP_006294.2|	AIMP2	|AIMP2|7965|Q13155|aminoacyl tRNA synthase complex-interacting multifunctional protein 2 [Homo sapiens]	SCENLAPFNTALK	SC[+418.1]ENLAPFNTALK	SC#ENLAPFNTALK	913.416	2	C306	72.99	83263868	-0.313	BTD
NP_573566.2|	LRPPRC	|LRPPRC|10128|P42704;E5KNY5|leucine-rich PPR motif-containing protein, mitochondrial precursor [Homo sapiens]	SCGSLLPELK	SC[+418.1]GSLLPELK	SC#GSLLPELK	732.847	2	C130	74.87	265464824	-0.226698	BTD
NP_001348.2|	DHX9	|DHX9|1660|Q08211;B3KU66|ATP-dependent RNA helicase A [Homo sapiens]	SCGYSVR	SC[+418.1]GYSVR	SC#GYSVR	595.242	2	C469	53.73	80930440	-0.314105	BTD
NP_001054.1|	TF	|TF|7018|P02787;A0PJA6;Q06AH7|serotransferrin precursor [Homo sapiens]	SCHTGLGR	SC[+418.1]HTGLGR	SC#HTGLGR	624.766	2	C137	46.66	119853904	-0.295668	BTD
NP_001054.1|	TF	|TF|7018|P02787;A0PJA6;Q06AH7|serotransferrin precursor [Homo sapiens]	SCHTGLGR	SC[+418.1]HTGLGR	SC#HTGLGR	416.846	3	C137	46.66	307246480	-0.206907	BTD
NP_005947.3|	MTHFD1	|MTHFD1|4522|P11586;G3V2B8|C-1-tetrahydrofolate synthase, cytoplasmic [Homo sapiens]	SCKPKPIGK	SC[+418.1]KPKPIGK	SC#KPKPIGK	459.234	3	C326	38.44	278218816	-0.220657	BTD
NP_057406.2|	RAB14	|RAB14|51552|P61106|ras-related protein Rab-14 [Homo sapiens]	SCLLHQFTEK	SC[+418.1]LLHQFTEK	SC#LLHQFTEK	812.368	2	C26	71.44	578689952	-0.0783348	BTD
NP_002856.1|	RAB2A	|RAB2A|5862|P61019|ras-related protein Rab-2A isoform a [Homo sapiens]	SCLLLQFTDK	SC[+418.1]LLLQFTDK	SC#LLLQFTDK	793.373	2	C21	86.37	88480812	-0.310528	BTD
NP_002856.1|	RAB2A	|RAB2A|5862|P61019|ras-related protein Rab-2A isoform a [Homo sapiens]	SCLLLQFTDKR	SC[+418.1]LLLQFTDKR	SC#LLLQFTDKR	581.285	3	C21	80.38	91798872	-0.308957	BTD
NP_003900.1|	CPNE3	|CPNE3|8895|O75131;Q05DL8|copine-3 [Homo sapiens]	SCLPQIK	SC[+418.1]LPQIK	SC#LPQIK	603.786	2	C385	66.6	929202976	0.0876901	BTD
NP_003893.2|	FUBP1	|FUBP1|8880|Q96AE4|far upstream element-binding protein 1 [Homo sapiens]	SCMLTGTPESVQSAK	SC[+418.1]M[+16]LTGTPESVQSAK	SC#MLTGTPESVQSAK	986.926	2	C148	58.31	156534912	-0.278294	BTD
NP_001419.1|	ENO1	|ENO1|2023|P06733|alpha-enolase isoform 1 [Homo sapiens]	SCNCLLLK	SC[+418.1]NC[+57]LLLK	SC#NCLLLK	684.809	2	C337	66.72	881081280	0.0648966	BTD
NP_004437.2|	EPRS	|EPRS|2058|P07814|bifunctional glutamate/proline--tRNA ligase [Homo sapiens]	SCQFVAVR	SC[+418.1]QFVAVR	SC#QFVAVR	664.3	2	C1377	65.06	367156128	-0.17853	BTD
NP_001041660.1|	RCC1	|RCC1|1104|P18754|regulator of chromosome condensation isoform b [Homo sapiens]	SCQVSHR	SC[+418.1]QVSHR	SC#QVSHR	617.758	2	C40	41.68	200662104	-0.257392	BTD
NP_001041660.1|	RCC1	|RCC1|1104|P18754|regulator of chromosome condensation isoform b [Homo sapiens]	SCQVSHR	SC[+418.1]QVSHR	SC#QVSHR	412.175	3	C40	41.68	244348408	-0.2367	BTD
NP_005653.3|	VDAC3	|VDAC3|7419|Q9Y277|voltage-dependent anion-selective channel protein 3 isoform 1 [Homo sapiens]	SCSGVEFSTSGHAYTDTGK	SC[+418.1]SGVEFSTSGHAYTDTGK	SC#SGVEFSTSGHAYTDTGK	784.656	3	C36	56.59	703083872	-0.019414	BTD
NP_036313.3|	FKBP8	|FKBP8|23770|Q14318|peptidyl-prolyl cis-trans isomerase FKBP8 [Homo sapiens]	SCSLVLEHQPDNIK	SC[+418.1]SLVLEHQPDNIK	SC#SLVLEHQPDNIK	667.645	3	C296	61.57	413986896	-0.156348	BTD
NP_060857.2|	STRBP	|STRBP|55342|Q96SI9|spermatid perinuclear RNA-binding protein isoform 1 [Homo sapiens]	SCVIVLR	SC[+418.1]VIVLR	SC#VIVLR	604.302	2	C218	72.51	899650080	0.073692	BTD
NP_002038.2|	GARS	|GARS|2617|P41250|glycine--tRNA ligase precursor [Homo sapiens]	SCYDLSCHAR	SC[+418.1]YDLSC[+57]HAR	SC#YDLSCHAR	815.316	2	C466	54.14	112860492	-0.298981	BTD
NP_002038.2|	GARS	|GARS|2617|P41250|glycine--tRNA ligase precursor [Homo sapiens]	SCYDLSCHAR	SC[+418.1]YDLSC[+57]HAR	SC#YDLSCHAR	543.88	3	C466	54.14	564521728	-0.0850457	BTD
NP_001419.1|	ENO1	|ENO1|2023|P06733|alpha-enolase isoform 1 [Homo sapiens]	SCNCLLLK	SC[+57]NC[+418.1]LLLK	SCNC#LLLK	684.809	2	C339	72.18	974446976	0.10912	BTD
NP_001419.1|	ENO1	|ENO1|2023|P06733|alpha-enolase isoform 1 [Homo sapiens]	SCNCLLLK	SC[+57]NC[+418.1]LLLK	SCNC#LLLK	456.875	3	C339	72.18	116477032	-0.297268	BTD
NP_116294.1|	RBM17	|RBM17|84991|Q96I25;Q5W009|splicing factor 45 [Homo sapiens]	SDSNPLTEILKCPTK	SDSNPLTEILKC[+418.1]PTK	SDSNPLTEILKC#PTK	688.664	3	C302	78.41	277160880	-0.221158	BTD
NP_066964.1|	XRCC5	|XRCC5|7520|P13010|X-ray repair cross-complementing protein 5 [Homo sapiens]	SEGKCFSVLGFCK	SEGKC[+418.1]FSVLGFC[+57]K	SEGKC#FSVLGFCK	627.277	3	C339	72.95	355006976	-0.184285	BTD
NP_003674.1|	RRP1	|RRP1|8568|P56182|ribosomal RNA processing protein 1 homolog A [Homo sapiens]	SEKPPAGSICR	SEKPPAGSIC[+418.1]R	SEKPPAGSIC#R	781.858	2	C274	51.29	244340928	-0.236703	BTD
NP_003674.1|	RRP1	|RRP1|8568|P56182|ribosomal RNA processing protein 1 homolog A [Homo sapiens]	SEKPPAGSICR	SEKPPAGSIC[+418.1]R	SEKPPAGSIC#R	521.575	3	C274	51.29	1461882816	0.340001	BTD
NP_055181.3|	GNL3	|GNL3|26354|Q9BVP2|guanine nucleotide-binding protein-like 3 isoform 1 [Homo sapiens]	SEVCFGK	SEVC[+418.1]FGK	SEVC#FGK	594.247	2	C234	61.61	419526528	-0.153725	BTD
NP_000535.3|	TAP2	|TAP2|6891|Q03519;Q5HY71|antigen peptide transporter 2 isoform 1 [Homo sapiens]	SFGAEEHEVCR	SFGAEEHEVC[+418.1]R	SFGAEEHEVC#R	841.34	2	C353	54.07	73047324	-0.317839	BTD
NP_000535.3|	TAP2	|TAP2|6891|Q03519;Q5HY71|antigen peptide transporter 2 isoform 1 [Homo sapiens]	SFGAEEHEVCR	SFGAEEHEVC[+418.1]R	SFGAEEHEVC#R	561.229	3	C353	54.07	301447168	-0.209654	BTD
NP_001059.2|	TOP2B	|TOP2B|7155|Q02880;Q8WTY5|DNA topoisomerase 2-beta [Homo sapiens]	SFGSKCQLSEK	SFGSKC[+418.1]QLSEK	SFGSKC#QLSEK	544.578	3	C408	52.98	79463080	-0.3148	BTD
NP_002799.3|	PSMD2	|PSMD2|5708|Q13200|26S proteasome non-ATPase regulatory subunit 2 [Homo sapiens]	SGALLACGIVNSGVR	SGALLAC[+418.1]GIVNSGVR	SGALLAC#GIVNSGVR	917.951	2	C448	75.84	131690392	-0.290062	BTD
NP_001448.2|	FLNB	|FLNB|2317|O75369|filamin-B isoform 2 [Homo sapiens]	SGCIVNNLAEFTVDPK	SGC[+418.1]IVNNLAEFTVDPK	SGC#IVNNLAEFTVDPK	1062.99	2	C660	85.38	108631940	-0.300984	BTD
NP_001448.2|	FLNB	|FLNB|2317|O75369|filamin-B isoform 2 [Homo sapiens]	SGCIVNNLAEFTVDPK	SGC[+418.1]IVNNLAEFTVDPK	SGC#IVNNLAEFTVDPK	708.996	3	C660	85.38	50517064	-0.32851	BTD
NP_001393.1|	EEF1A1	|EEF1A1|1915|P68104;Q6IPS9|elongation factor 1-alpha 1 [Homo sapiens]	SGDAAIVDMVPGKPMCVESFSDYPPLGR	SGDAAIVDM[+16]VPGKPM[+16]C[+418.1]VESFSDYPPLGR	SGDAAIVDMVPGKPMC#VESFSDYPPLGR	1130.17	3	C411	73.27	8182160384	3.52314	BTD
NP_001393.1|	EEF1A1	|EEF1A1|1915|P68104;Q6IPS9|elongation factor 1-alpha 1 [Homo sapiens]	SGDAAIVDMVPGKPMCVESFSDYPPLGR	SGDAAIVDM[+16]VPGKPM[+16]C[+418.1]VESFSDYPPLGR	SGDAAIVDMVPGKPMC#VESFSDYPPLGR	847.88	4	C411	73.27	3567618816	1.33741	BTD
NP_115571.1|	SON	|SON|6651|P18583|protein SON isoform B [Homo sapiens]	SGGATIEELTEKCK	SGGATIEELTEKC[+418.1]K	SGGATIEELTEKC#K	942.429	2	C2109	63.5	169043768	-0.272369	BTD
NP_115571.1|	SON	|SON|6651|P18583|protein SON isoform B [Homo sapiens]	SGGATIEELTEKCK	SGGATIEELTEKC[+418.1]K	SGGATIEELTEKC#K	628.622	3	C2109	63.5	430178480	-0.148679	BTD
NP_060542.4|	HEATR1	|HEATR1|55127|Q9H583;A2VDI1;B2RWN5|HEAT repeat-containing protein 1 [Homo sapiens]	SGICSLHPLLR	SGIC[+418.1]SLHPLLR	SGIC#SLHPLLR	538.602	3	C631	69.98	726077152	-0.00852299	BTD
NP_003267.1|	TMPO	|TMPO|7112|P42166|thymopoietin isoform alpha [Homo sapiens]	SGIQPLCPER	SGIQPLC[+418.1]PER	SGIQPLC#PER	759.347	2	C341	67.77	167566904	-0.273068	BTD
NP_000959.2|	RPL4	|RPL4|6124|P36578|60S ribosomal protein L4 [Homo sapiens]	SGQGAFGNMCR	SGQGAFGNM[+16]C[+418.1]R	SGQGAFGNMC#R	781.303	2	C96	54.83	5550034944	2.2764	BTD
NP_000959.2|	RPL4	|RPL4|6124|P36578|60S ribosomal protein L4 [Homo sapiens]	SGQGAFGNMCR	SGQGAFGNM[+16]C[+418.1]R	SGQGAFGNMC#R	521.204	3	C96	54.83	1330966848	0.277991	BTD
NP_005778.1|	ALG3	|ALG3|10195|Q92685|dol-P-Man:Man(5)GlcNAc(2)-PP-Dol alpha-1,3-mannosyltransferase isoform a [Homo sapiens]	SGSAAQAEGLCK	SGSAAQAEGLC[+418.1]K	SGSAAQAEGLC#K	770.332	2	C21	57.56	133937096	-0.288998	BTD
NP_056474.2|	RSL1D1	|RSL1D1|26156|O76021|ribosomal L1 domain-containing protein 1 [Homo sapiens]	SGSCSAIR	SGSC[+418.1]SAIR	SGSC#SAIR	599.753	2	C211	51.7	346587440	-0.188273	BTD
NP_003463.1|	DEK	|DEK|7913|P35659|protein DEK isoform 1 [Homo sapiens]	SICEVLDLER	SIC[+418.1]EVLDLER	SIC#EVLDLER	797.866	2	C161	79.52	33132929	-0.336745	BTD
NP_055093.2|	HSPA4L	|HSPA4L|22824|O95757;A2ICT2|heat shock 70 kDa protein 4L [Homo sapiens]	SIDLPIQSSLCR	SIDLPIQSSLC[+418.1]R	SIDLPIQSSLC#R	875.419	2	C589	78.94	52632694	-0.327508	BTD
NP_009210.1|	U2AF2	|U2AF2|11338|P26368|splicing factor U2AF 65 kDa subunit isoform a [Homo sapiens]	SIEIPRPVDGVEVPGCGK	SIEIPRPVDGVEVPGC[+418.1]GK	SIEIPRPVDGVEVPGC#GK	757.37	3	C429	71.23	173316584	-0.270345	BTD
NP_055140.1|	CORO1C	|CORO1C|23603|Q9ULV4|coronin-1C isoform 1 [Homo sapiens]	SIKDTICNQDER	SIKDTIC[+418.1]NQDER	SIKDTIC#NQDER	920.404	2	C456	55.82	492612160	-0.119107	BTD
NP_055140.1|	CORO1C	|CORO1C|23603|Q9ULV4|coronin-1C isoform 1 [Homo sapiens]	SIKDTICNQDER	SIKDTIC[+418.1]NQDER	SIKDTIC#NQDER	613.938	3	C456	55.82	1632723840	0.420922	BTD
NP_006592.3|	PTGES3	|PTGES3|10728|Q15185|prostaglandin E synthase 3 [Homo sapiens]	SILCCLR	SILC[+418.1]C[+57]LR	SILC#CLR	641.791	2	C75	72.3	1488250880	0.35249	BTD
NP_006592.3|	PTGES3	|PTGES3|10728|Q15185|prostaglandin E synthase 3 [Homo sapiens]	SILCCLR	SILC[+418.1]C[+57]LR	SILC#CLR	428.196	3	C75	72.3	194965608	-0.260091	BTD
NP_001157108.1|	GTF2I	|GTF2I|2969|P78347;Q499G6|general transcription factor II-I isoform 5 [Homo sapiens]	SILSPGGSCGPIK	SILSPGGSC[+418.1]GPIK	SILSPGGSC#GPIK	817.389	2	C215	67.86	149482824	-0.281634	BTD
NP_695012.1|	UBA1	|UBA1|7317|P22314|ubiquitin-like modifier-activating enzyme 1 [Homo sapiens]	SIPICTLK	SIPIC[+418.1]TLK	SIPIC#TLK	646.823	2	C632	70.66	1285768448	0.256582	BTD
NP_005991.1|	TUBA4A	|TUBA4A|7277|P68366|tubulin alpha-4A chain [Homo sapiens]	SIQFVDWCPTGFK	SIQFVDWC[+418.1]PTGFK	SIQFVDWC#PTGFK	973.434	2	C347	87.03	68050480	-0.320206	BTD
NP_005991.1|	TUBA4A	|TUBA4A|7277|P68366|tubulin alpha-4A chain [Homo sapiens]	SIQFVDWCPTGFK	SIQFVDWC[+418.1]PTGFK	SIQFVDWC#PTGFK	649.292	3	C347	87.03	35823388	-0.33547	BTD
NP_002261.3|	TNPO1	|TNPO1|3842|Q92973|transportin-1 isoform 1 [Homo sapiens]	SITCWTLSR	SITC[+418.1]WTLSR	SITC#WTLSR	742.837	2	C467	74.45	213327088	-0.251393	BTD
NP_001129477.1|	GART	|GART|2618|P22102|trifunctional purine biosynthetic protein adenosine-3 isoform 1 [Homo sapiens]	SKEEACK	SKEEAC[+418.1]K	SKEEAC#K	606.755	2	C168	36.71	426383824	-0.150476	BTD
NP_001129477.1|	GART	|GART|2618|P22102|trifunctional purine biosynthetic protein adenosine-3 isoform 1 [Homo sapiens]	SKEEACK	SKEEAC[+418.1]K	SKEEAC#K	404.839	3	C168	36.71	267076800	-0.225934	BTD
NP_004136.2|	MYO9B	|MYO9B|4650|Q13459;B0I1T6;Q8WVD2|unconventional myosin-IXb isoform 1 [Homo sapiens]	SKPCGSPR	SKPC[+418.1]GSPR	SKPC#GSPR	625.276	2	C1279	40.22	385367264	-0.169904	BTD
NP_004136.2|	MYO9B	|MYO9B|4650|Q13459;B0I1T6;Q8WVD2|unconventional myosin-IXb isoform 1 [Homo sapiens]	SKPCGSPR	SKPC[+418.1]GSPR	SKPC#GSPR	417.187	3	C1279	40.22	676863520	-0.0318336	BTD
NP_004437.2|	EPRS	|EPRS|2058|P07814|bifunctional glutamate/proline--tRNA ligase [Homo sapiens]	SLCIPFKPLCELQPGAK	SLC[+418.1]IPFKPLC[+57]ELQPGAK	SLC#IPFKPLCELQPGAK	773.716	3	C1480	80.27	655754176	-0.0418323	BTD
NP_036548.1|	RANBP6	|RANBP6|26953|O60518|ran-binding protein 6 isoform 1 [Homo sapiens]	SLCSEAVPLLVK	SLC[+418.1]SEAVPLLVK	SLC#SEAVPLLVK	838.923	2	C952	81.33	28355942	-0.339007	BTD
NP_004437.2|	EPRS	|EPRS|2058|P07814|bifunctional glutamate/proline--tRNA ligase [Homo sapiens]	SLCIPFKPLCELQPGAK	SLC[+57]IPFKPLC[+418.1]ELQPGAK	SLCIPFKPLC#ELQPGAK	773.716	3	C1487	79.92	567916688	-0.0834377	BTD
NP_004437.2|	EPRS	|EPRS|2058|P07814|bifunctional glutamate/proline--tRNA ligase [Homo sapiens]	SLCIPFKPLCELQPGAK	SLC[+57]IPFKPLC[+418.1]ELQPGAK	SLCIPFKPLC#ELQPGAK	580.539	4	C1487	79.92	66503442	-0.320938	BTD
NP_006296.1|	ANP32A	|ANP32A|8125|P39687|acidic leucine-rich nuclear phosphoprotein 32 family member A [Homo sapiens]	SLDLFNCEVTNLNDYR	SLDLFNC[+418.1]EVTNLNDYR	SLDLFNC#EVTNLNDYR	1167.51	2	C123	83.98	34159060	-0.336259	BTD
NP_001408.2|	EIF4B	|EIF4B|1975|P23588|eukaryotic translation initiation factor 4B [Homo sapiens]	SLENETLNKEEDCHSPTSKPPKPDQPLK	SLENETLNKEEDC[+418.1]HSPTSKPPKPDQPLK	SLENETLNKEEDC#HSPTSKPPKPDQPLK	895.674	4	C457	46.7	122144112	-0.294583	BTD
NP_001367.2|	DYNC1H1	|DYNC1H1|1778|Q14204|cytoplasmic dynein 1 heavy chain 1 [Homo sapiens]	SLETCMYDHK	SLETC[+418.1]M[+16]YDHK	SLETC#MYDHK	830.826	2	C867	51.63	166513008	-0.273568	BTD
NP_001367.2|	DYNC1H1	|DYNC1H1|1778|Q14204|cytoplasmic dynein 1 heavy chain 1 [Homo sapiens]	SLETCMYDHK	SLETC[+418.1]M[+16]YDHK	SLETC#MYDHK	554.22	3	C867	51.63	830910848	0.0411328	BTD
NP_008835.5|	PRKDC	|PRKDC|5591|P78527|DNA-dependent protein kinase catalytic subunit isoform 1 [Homo sapiens]	SLGTIQQCCDAIDHLCR	SLGTIQQC[+57]C[+418.1]DAIDHLC[+57]R	SLGTIQQCC#DAIDHLCR	803.347	3	C1128	70.97	125888264	-0.29281	BTD
NP_036205.1|	CCT5	|CCT5|22948|P48643|T-complex protein 1 subunit epsilon [Homo sapiens]	SLHDALCVIR	SLHDALC[+418.1]VIR	SLHDALC#VIR	515.583	3	C407	70.53	752454432	0.00397094	BTD
NP_001185771.1|	CCT2	|CCT2|10576|P78371|T-complex protein 1 subunit beta isoform 2 [Homo sapiens]	SLHDALCVLAQTVK	SLHDALC[+418.1]VLAQTVK	SLHDALC#VLAQTVK	958.474	2	C348	84.49	325720608	-0.198157	BTD
NP_001185771.1|	CCT2	|CCT2|10576|P78371|T-complex protein 1 subunit beta isoform 2 [Homo sapiens]	SLHDALCVLAQTVK	SLHDALC[+418.1]VLAQTVK	SLHDALC#VLAQTVK	639.318	3	C348	84.49	894115904	0.0710707	BTD
NP_001008897.1|	TCP1	|TCP1|6950|E7EQR6|T-complex protein 1 subunit alpha isoform b [Homo sapiens]	SLHDALCVVK	SLHDALC[+418.1]VVK	SLHDALC#VVK	751.86	2	C242	66.38	1884199872	0.540036	BTD
NP_001091981.1|	KIF2A	|KIF2A|3796|O00139|kinesin-like protein KIF2A isoform 2 [Homo sapiens]	SLLALKECIR	SLLALKEC[+418.1]IR	SLLALKEC#IR	521.939	3	C491	69.15	39708904	-0.33363	BTD
NP_722546.1|	PYCR1	|PYCR1|5831|A6NFM2;Q9HBQ4|pyrroline-5-carboxylate reductase 1, mitochondrial isoform 2 [Homo sapiens]	SLLINAVEASCIR	SLLINAVEASC[+418.1]IR	SLLINAVEASC#IR	903.947	2	C262	86.54	138546492	-0.286814	BTD
NP_722546.1|	PYCR1	|PYCR1|5831|A6NFM2;Q9HBQ4|pyrroline-5-carboxylate reductase 1, mitochondrial isoform 2 [Homo sapiens]	SLLINAVEASCIR	SLLINAVEASC[+418.1]IR	SLLINAVEASC#IR	602.967	3	C262	86.54	147956744	-0.282357	BTD
NP_055571.2|	CKAP5	|CKAP5|9793|Q14008|cytoskeleton-associated protein 5 isoform b [Homo sapiens]	SLLKPFCAALLK	SLLKPFC[+418.1]AALLK	SLLKPFC#AALLK	574.642	3	C441	78.67	70129552	-0.319221	BTD
NP_057417.3|	SRRM2	|SRRM2|23524|Q9UQ35|serine/arginine repetitive matrix protein 2 [Homo sapiens]	SLSGSSPCPK	SLSGSSPC[+418.1]PK	SLSGSSPC#PK	690.8	2	C785	54.45	619040192	-0.0592224	BTD
NP_001272.2|	TBCB	|TBCB|1155|Q99426|tubulin-folding cofactor B [Homo sapiens]	SLTIAEFKCK	SLTIAEFKC[+418.1]K	SLTIAEFKC#K	779.376	2	C39	65.78	83450720	-0.312911	BTD
NP_001272.2|	TBCB	|TBCB|1155|Q99426|tubulin-folding cofactor B [Homo sapiens]	SLTIAEFKCK	SLTIAEFKC[+418.1]K	SLTIAEFKC#K	519.92	3	C39	65.78	126625956	-0.292461	BTD
NP_733765.1|	ATP2A2	|ATP2A2|488|P16615|sarcoplasmic/endoplasmic reticulum calcium ATPase 2 isoform b [Homo sapiens]	SMSVYCTPNKPSR	SM[+16]SVYC[+418.1]TPNKPSR	SMSVYC#TPNKPSR	952.41	2	C498	49.89	161901296	-0.275752	BTD
NP_733765.1|	ATP2A2	|ATP2A2|488|P16615|sarcoplasmic/endoplasmic reticulum calcium ATPase 2 isoform b [Homo sapiens]	SMSVYCTPNKPSR	SM[+16]SVYC[+418.1]TPNKPSR	SMSVYC#TPNKPSR	635.276	3	C498	49.89	1356691520	0.290175	BTD
NP_002798.2|	PSMD1	|PSMD1|5707|Q99460|26S proteasome non-ATPase regulatory subunit 1 isoform 1 [Homo sapiens]	SNCKPSTFAYPAPLEVPK	SNC[+418.1]KPSTFAYPAPLEVPK	SNC#KPSTFAYPAPLEVPK	789.71	3	C806	67.11	219884800	-0.248287	BTD
NP_003128.3|	SRPK1	|SRPK1|6732|Q96SB4;B4DS61|SRSF protein kinase 1 [Homo sapiens]	SNYQGLPLPCVK	SNYQGLPLPC[+418.1]VK	SNYQGLPLPC#VK	868.91	2	C188	76.99	190684760	-0.262118	BTD
NP_057417.3|	SRRM2	|SRRM2|23524|Q9UQ35|serine/arginine repetitive matrix protein 2 [Homo sapiens]	SPCPQEK	SPC[+418.1]PQEK	SPC#PQEK	603.75	2	C1016	47.1	92105356	-0.308812	BTD
NP_071904.4|	XPO4	|XPO4|64328|Q9C0E2|exportin-4 [Homo sapiens]	SPFAVCK	SPFAVC[+418.1]K	SPFAVC#K	585.26	2	C54	65.73	304141136	-0.208378	BTD
NP_002803.2|	PSMD8	|PSMD8|5714|P48556|26S proteasome non-ATPase regulatory subunit 8 [Homo sapiens]	SPNLSKCGEELGR	SPNLSKC[+418.1]GEELGR	SPNLSKC#GEELGR	603.275	3	C112	56.42	163690160	-0.274905	BTD
NP_056655.2|	ADAR	|ADAR|103|P55265|double-stranded RNA-specific adenosine deaminase isoform b [Homo sapiens]	SPVTTLLECMHK	SPVTTLLEC[+418.1]MHK	SPVTTLLEC#MHK	592.942	3	C622	79.97	196227264	0.755331	BTD
NP_056655.2|	ADAR	|ADAR|103|P55265|double-stranded RNA-specific adenosine deaminase isoform b [Homo sapiens]	SPVTTLLECMHK	SPVTTLLEC[+418.1]M[+16]HK	SPVTTLLEC#MHK	598.274	3	C622	68.45	2338731520	-0.259493	BTD
NP_004042.1|	BDH1	|BDH1|622|Q02338|D-beta-hydroxybutyrate dehydrogenase, mitochondrial precursor [Homo sapiens]	SPYCITK	SPYC[+418.1]ITK	SPYC#ITK	615.27	2	C209	62.88	429049360	-0.149214	BTD
NP_001447.2|	FLNA	|FLNA|2316|P21333;Q60FE5;Q6NXF2|filamin-A isoform 1 [Homo sapiens]	SPYTVTVGQACNPSACR	SPYTVTVGQAC[+418.1]NPSAC[+57]R	SPYTVTVGQAC#NPSACR	743.656	3	C478	63.33	88527956	-0.310506	BTD
NP_005909.2|	MDH2	|MDH2|4191|P40926|malate dehydrogenase, mitochondrial precursor [Homo sapiens]	SQETECTYFSTPLLLGK	SQETEC[+418.1]TYFSTPLLLGK	SQETEC#TYFSTPLLLGK	779.026	3	C285	82.43	86551352	-0.311442	BTD
NP_001307.2|	CSE1L	|CSE1L|1434|P55060|exportin-2 isoform 1 [Homo sapiens]	SQICDNAALYAQK	SQIC[+418.1]DNAALYAQK	SQIC#DNAALYAQK	921.911	2	C272	62.44	589807424	-0.0730688	BTD
NP_001307.2|	CSE1L	|CSE1L|1434|P55060|exportin-2 isoform 1 [Homo sapiens]	SQICDNAALYAQK	SQIC[+418.1]DNAALYAQK	SQIC#DNAALYAQK	614.943	3	C272	62.44	161917172	-0.275744	BTD
NP_055704.2|	PITRM1	|PITRM1|10531|Q5JRX3|presequence protease, mitochondrial isoform 2 precursor [Homo sapiens]	SQQSKPQDASCLPALK	SQQSKPQDASC[+418.1]LPALK	SQQSKPQDASC#LPALK	707.003	3	C556	61.84	566747328	-0.0839916	BTD
NP_940993.1|	BSG	|BSG|682|P35613|basigin isoform 4 [Homo sapiens]	SSEHINEGETAMLVCK	SSEHINEGETAM[+16]LVC[+418.1]K	SSEHINEGETAMLVC#K	727.98	3	C62	57.93	388071984	-0.168623	BTD
NP_001013003.1|	C1orf31	|C1orf31|388753|Q5JTJ3|uncharacterized protein C1orf31 isoform 1 [Homo sapiens]	SSFESSCPQQWIK	SSFESSC[+418.1]PQQWIK	SSFESSC#PQQWIK	972.916	2	C90	71.07	23048033	-0.341522	BTD
NP_005013.1|	PFN1	|PFN1|5216|P07737;Q53Y44|profilin-1 [Homo sapiens]	SSFYVNGLTLGGQKCSVIR	SSFYVNGLTLGGQKC[+418.1]SVIR	SSFYVNGLTLGGQKC#SVIR	816.4	3	C71	73.42	87972220	-0.310769	BTD
NP_001611.1|	AHNAK	|AHNAK|79026|Q09666|neuroblast differentiation-associated protein AHNAK isoform 1 [Homo sapiens]	SSGCDVNLPGVNVK	SSGC[+418.1]DVNLPGVNVK	SSGC#DVNLPGVNVK	602.943	3	C5502	68.78	147586208	-0.282532	BTD
NP_003925.1|	FUBP3	|FUBP3|8939|Q96I24;A3KFK8|far upstream element-binding protein 3 [Homo sapiens]	SSGCFPNMAAK	SSGC[+418.1]FPNM[+16]AAK	SSGC#FPNMAAK	773.81	2	C460	58.45	343785984	-0.1896	BTD
NP_003925.1|	FUBP3	|FUBP3|8939|Q96I24;A3KFK8|far upstream element-binding protein 3 [Homo sapiens]	SSGCFPNMAAK	SSGC[+418.1]FPNM[+16]AAK	SSGC#FPNMAAK	516.209	3	C460	58.45	152630552	-0.280143	BTD
NP_001077059.1|	TMEM214	|TMEM214|54867|Q6NUQ4|transmembrane protein 214 isoform 2 [Homo sapiens]	SSGFLPASQQACAK	SSGFLPASQQAC[+418.1]AK	SSGFLPASQQAC#AK	906.906	2	C484	62.43	103506548	-0.303411	BTD
NP_001367.2|	DYNC1H1	|DYNC1H1|1778|Q14204|cytoplasmic dynein 1 heavy chain 1 [Homo sapiens]	SSLQSQCLNEVLK	SSLQSQC[+418.1]LNEVLK	SSLQSQC#LNEVLK	933.94	2	C3712	75.65	209616944	-0.253151	BTD
NP_001367.2|	DYNC1H1	|DYNC1H1|1778|Q14204|cytoplasmic dynein 1 heavy chain 1 [Homo sapiens]	SSLQSQCLNEVLK	SSLQSQC[+418.1]LNEVLK	SSLQSQC#LNEVLK	622.962	3	C3712	75.65	331384992	-0.195474	BTD
NP_055330.1|	CNOT2	|CNOT2|4848|Q9NZN8|CCR4-NOT transcription complex subunit 2 [Homo sapiens]	SSPSIICMPK	SSPSIIC[+418.1]M[+16]PK	SSPSIIC#MPK	748.833	2	C175	62.42	163066200	-0.2752	BTD
NP_001448.2|	FLNB	|FLNB|2317|O75369|filamin-B isoform 2 [Homo sapiens]	SSTETCYSAIPK	SSTETC[+418.1]YSAIPK	SSTETC#YSAIPK	852.866	2	C2501	62.72	310758304	-0.205244	BTD
NP_001348.2|	DHX9	|DHX9|1660|Q08211;B3KU66|ATP-dependent RNA helicase A [Homo sapiens]	SSVNCPFSSQDMK	SSVNC[+418.1]PFSSQDM[+16]K	SSVNC#PFSSQDMK	932.371	2	C1029	62.66	1742601216	0.472966	BTD
NP_001348.2|	DHX9	|DHX9|1660|Q08211;B3KU66|ATP-dependent RNA helicase A [Homo sapiens]	SSVNCPFSSQDMK	SSVNC[+418.1]PFSSQDM[+16]K	SSVNC#PFSSQDMK	621.916	3	C1029	62.66	517666816	-0.107239	BTD
NP_061849.2|	SLC38A2	|SLC38A2|54407|Q96QD8|sodium-coupled neutral amino acid transporter 2 [Homo sapiens]	SSVTHLLCASK	SSVTHLLC[+418.1]ASK	SSVTHLLC#ASK	782.368	2	C403	62.01	198534504	-0.2584	BTD
NP_061849.2|	SLC38A2	|SLC38A2|54407|Q96QD8|sodium-coupled neutral amino acid transporter 2 [Homo sapiens]	SSVTHLLCASK	SSVTHLLC[+418.1]ASK	SSVTHLLC#ASK	521.915	3	C403	62.01	108514752	-0.301039	BTD
NP_002262.3|	IPO5	|IPO5|3843|O00410;B3KWG6;Q9BVS9|importin-5 [Homo sapiens]	STACQMLVCYAK	STAC[+57]QM[+16]LVC[+418.1]YAK	STACQMLVC#YAK	904.877	2	C705	61.74	216331080	-0.249971	BTD
NP_567823.1|	WAC	|WAC|51322|Q9BTA9|WW domain-containing adapter protein with coiled-coil isoform 3 [Homo sapiens]	STCSLTPALAAHFSENLIK	STC[+418.1]SLTPALAAHFSENLIK	STC#SLTPALAAHFSENLIK	807.724	3	C450	79.8	243826016	-0.236947	BTD
NP_001952.1|	EEF2	|EEF2|1938|P13639|elongation factor 2 [Homo sapiens]	STLTDSLVCK	STLTDSLVC[+418.1]K	STLTDSLVC#K	742.842	2	C41	68.59	11185837056	4.94587	BTD
NP_001952.1|	EEF2	|EEF2|1938|P13639|elongation factor 2 [Homo sapiens]	STLTDSLVCK	STLTDSLVC[+418.1]K	STLTDSLVC#K	495.564	3	C41	68.59	4848831232	1.94427	BTD
NP_057535.1|	COPB1	|COPB1|1315|P53618|coatomer subunit beta [Homo sapiens]	STNMKCLTPEK	STNM[+16]KC[+418.1]LTPEK	STNMKC#LTPEK	562.583	3	C877	48.37	668128384	-0.0359711	BTD
NP_008941.2|	DDX52	|DDX52|11056|Q9Y2R4;Q59H21|probable ATP-dependent RNA helicase DDX52 [Homo sapiens]	SVANVIQQAGCPVPEYIK	SVANVIQQAGC[+418.1]PVPEYIK	SVANVIQQAGC#PVPEYIK	1167.57	2	C536	77.36	143814920	-0.284319	BTD
NP_008941.2|	DDX52	|DDX52|11056|Q9Y2R4;Q59H21|probable ATP-dependent RNA helicase DDX52 [Homo sapiens]	SVANVIQQAGCPVPEYIK	SVANVIQQAGC[+418.1]PVPEYIK	SVANVIQQAGC#PVPEYIK	778.713	3	C536	77.36	836432064	0.043748	BTD
NP_003592.3|	SMARCA5	|SMARCA5|8467|O60264|SWI/SNF-related matrix-associated actin-dependent regulator of chromatin subfamily A member 5 [Homo sapiens]	SVCLIGDK	SVC[+418.1]LIGDK	SVC#LIGDK	626.789	2	C259	69.14	247383960	-0.235262	BTD
NP_003592.3|	SMARCA5	|SMARCA5|8467|O60264|SWI/SNF-related matrix-associated actin-dependent regulator of chromatin subfamily A member 5 [Homo sapiens]	SVCLIGDKEQR	SVC[+418.1]LIGDKEQR	SVC#LIGDKEQR	833.39	2	C259	61.95	371303888	-0.176566	BTD
NP_003592.3|	SMARCA5	|SMARCA5|8467|O60264|SWI/SNF-related matrix-associated actin-dependent regulator of chromatin subfamily A member 5 [Homo sapiens]	SVCLIGDKEQR	SVC[+418.1]LIGDKEQR	SVC#LIGDKEQR	555.929	3	C259	61.95	264814432	-0.227006	BTD
NP_002794.1|	PSMC2	|PSMC2|5701|P35998|26S protease regulatory subunit 7 isoform 1 [Homo sapiens]	SVCTEAGMFAIR	SVC[+418.1]TEAGM[+16]FAIR	SVC#TEAGMFAIR	859.87	2	C389	69.91	117877740	-0.296604	BTD
NP_002379.3|	MCM3	|MCM3|4172|-|DNA replication licensing factor MCM3 isoform 1 [Homo sapiens]	SVHYCPATK	SVHYC[+418.1]PATK	SVHYC#PATK	712.31	2	C193	49.82	481712016	-0.12427	BTD
NP_004374.1|	CSK	|CSK|1445|P41240;B2R6Q4|tyrosine-protein kinase CSK [Homo sapiens]	SVLGGDCLLK	SVLGGDC[+418.1]LLK	SVLGGDC#LLK	711.841	2	C290	75.93	262051120	-0.228315	BTD
NP_002473.2|	NASP	|NASP|4678|P49321|nuclear autoantigenic sperm protein isoform 2 [Homo sapiens]	SVSGTDVQEECREK	SVSGTDVQEEC[+418.1]REK	SVSGTDVQEEC#REK	662.284	3	C254	47.88	148427992	-0.282134	BTD
NP_005329.3|	HIP1	|HIP1|3092|O00291|huntingtin-interacting protein 1 isoform 1 [Homo sapiens]	SVSVTAAGQCR	SVSVTAAGQC[+418.1]R	SVSVTAAGQC#R	748.835	2	C220	54.09	219994152	-0.248236	BTD
NP_001560.2|	IRAK1	|IRAK1|3654|P51617|interleukin-1 receptor-associated kinase 1 isoform 1 [Homo sapiens]	SWHLTPSCPLDPAPLR	SWHLTPSC[+418.1]PLDPAPLR	SWHLTPSC#PLDPAPLR	736.684	3	C608	76.54	111875816	-0.299447	BTD
NP_000985.1|	RPL32	|RPL32|6161|P62910|60S ribosomal protein L32 [Homo sapiens]	SYCAEIAHNVSSK	SYC[+418.1]AEIAHNVSSK	SYC#AEIAHNVSSK	913.895	2	C96	57.25	370590560	-0.176904	BTD
NP_000985.1|	RPL32	|RPL32|6161|P62910|60S ribosomal protein L32 [Homo sapiens]	SYCAEIAHNVSSK	SYC[+418.1]AEIAHNVSSK	SYC#AEIAHNVSSK	609.599	3	C96	57.25	1921166400	0.557546	BTD
NP_060663.2|	FANCI	|FANCI|55215|Q9NVI1;B3KNW8|Fanconi anemia group I protein isoform 2 [Homo sapiens]	TAAPTVCLLVLSQAEK	TAAPTVC[+418.1]LLVLSQAEK	TAAPTVC#LLVLSQAEK	1031.52	2	C1025	85.36	49748506	-0.328874	BTD
NP_060663.2|	FANCI	|FANCI|55215|Q9NVI1;B3KNW8|Fanconi anemia group I protein isoform 2 [Homo sapiens]	TAAPTVCLLVLSQAEK	TAAPTVC[+418.1]LLVLSQAEK	TAAPTVC#LLVLSQAEK	688.016	3	C1025	85.36	118902392	-0.296119	BTD
NP_060531.2|	PRPF38B	|PRPF38B|55119|Q5VTL8;Q69YH0|pre-mRNA-splicing factor 38B [Homo sapiens]	TAGQTGMCGGVR	TAGQTGM[+16]C[+418.1]GGVR	TAGQTGMC#GGVR	786.324	2	C113	48.13	185730928	-0.264465	BTD
NP_075266.1|	ACSL4	|ACSL4|2182|O60488|long-chain-fatty-acid--CoA ligase 4 isoform 2 [Homo sapiens]	TALLDISCVK	TALLDISC[+418.1]VK	TALLDISC#VK	740.862	2	C221	76.03	108963792	-0.300826	BTD
NP_056375.2|	OPA1	|OPA1|4976|O60313|dynamin-like 120 kDa protein, mitochondrial isoform 1 [Homo sapiens]	TALNHCNLCR	TALNHC[+418.1]NLC[+57]R	TALNHC#NLCR	540.567	3	C853	52.39	105735908	-0.302355	BTD
NP_149072.2|	DIDO1	|DIDO1|11083|Q9BTC0|death-inducer obliterator 1 isoform c [Homo sapiens]	TAPSSSCTAVASAASRPDSTHMVEAR	TAPSSSC[+418.1]TAVASAASRPDSTHM[+16]VEAR	TAPSSSC#TAVASAASRPDSTHMVEAR	756.837	4	C976	50.9	183839016	-0.265361	BTD
NP_006436.3|	PRPF8	|PRPF8|10594|Q6P2Q9|pre-mRNA-processing-splicing factor 8 [Homo sapiens]	TAQCFLR	TAQC[+418.1]FLR	TAQC#FLR	628.781	2	C1228	70.12	192287600	-0.261359	BTD
NP_066961.2|	TRAF2	|TRAF2|7186|Q12933|TNF receptor-associated factor 2 [Homo sapiens]	TATFENIVCVLNR	TATFENIVC[+418.1]VLNR	TATFENIVC#VLNR	949.45	2	C287	82.82	68491856	-0.319996	BTD
NP_066961.2|	TRAF2	|TRAF2|7186|Q12933|TNF receptor-associated factor 2 [Homo sapiens]	TATFENIVCVLNR	TATFENIVC[+418.1]VLNR	TATFENIVC#VLNR	633.303	3	C287	82.82	92099896	-0.308814	BTD
NP_002071.2|	GOT2	|GOT2|2806|P00505|aspartate aminotransferase, mitochondrial precursor [Homo sapiens]	TCGFDFTGAVEDISK	TC[+418.1]GFDFTGAVEDISK	TC#GFDFTGAVEDISK	1004.43	2	C187	81.59	40927676	-0.333053	BTD
NP_031372.2|	OGFR	|OGFR|11054|Q9NZT2|opioid growth factor receptor [Homo sapiens]	TCGPEHSK	TC[+418.1]GPEHSK	TC#GPEHSK	426.174	3	C330	38.7	40015026	-0.333485	BTD
NP_005329.3|	HIP1	|HIP1|3092|O00291|huntingtin-interacting protein 1 isoform 1 [Homo sapiens]	TCILGTHHEK	TC[+418.1]ILGTHHEK	TC#ILGTHHEK	519.571	3	C63	55.71	367449776	-0.178391	BTD
NP_005989.3|	CCT3	|CCT3|7203|P49368;B3KX11;Q59H77|T-complex protein 1 subunit gamma isoform a [Homo sapiens]	TCLGPK	TC[+418.1]LGPK	TC#LGPK	518.733	2	C40	55.96	835957280	0.0435231	BTD
NP_005902.1|	MAT2A	|MAT2A|4144|P31153|S-adenosylmethionine synthase isoform type-2 [Homo sapiens]	TCNVLVALEQQSPDIAQGVHLDR	TC[+418.1]NVLVALEQQSPDIAQGVHLDR	TC#NVLVALEQQSPDIAQGVHLDR	975.472	3	C104	83.01	117566672	-0.296752	BTD
NP_783322.1|	RAB3IP	|RAB3IP|117177|Q96QF0|rab-3A-interacting protein isoform alpha 2 [Homo sapiens]	TCPFLDK	TC[+418.1]PFLDK	TC#PFLDK	621.27	2	C334	70.99	82763616	-0.313236	BTD
NP_001349.2|	DHX15	|DHX15|1665|O43143|putative pre-mRNA-splicing factor ATP-dependent RNA helicase DHX15 [Homo sapiens]	TCTDIKPEWLVK	TC[+418.1]TDIKPEWLVK	TC#TDIKPEWLVK	617.632	3	C750	68.83	421449904	-0.152813	BTD
NP_006420.1|	CCT7	|CCT7|10574|Q99832|T-complex protein 1 subunit eta isoform a [Homo sapiens]	TCTFILR	TC[+418.1]TFILR	TC#TFILR	636.299	2	C370	73.24	448655584	-0.139927	BTD
NP_000963.1|	RPL7A	|RPL7A|6130|P62424;Q5T8U4|60S ribosomal protein L7a [Homo sapiens]	TCTTVAFTQVNSEDKGALAK	TC[+418.1]TTVAFTQVNSEDKGALAK	TC#TTVAFTQVNSEDKGALAK	834.726	3	C199	63.48	343313696	-0.189824	BTD
NP_055389.3|	STRN3	|STRN3|29966|Q13033|striatin-3 isoform 2 [Homo sapiens]	TCVQEITAHR	TC[+418.1]VQEITAHR	TC#VQEITAHR	525.906	3	C673	55.7	172206520	-0.270871	BTD
NP_055427.2|	FAM120A	|FAM120A|23196|Q9NZB2|constitutive coactivator of PPAR-gamma-like protein 1 [Homo sapiens]	TCNTNPHLNALSTDSACR	TC[+57]NTNPHLNALSTDSAC[+418.1]R	TCNTNPHLNALSTDSAC#R	798.34	3	C1103	55.98	284586768	-0.21764	BTD
NP_002794.1|	PSMC2	|PSMC2|5701|P35998|26S protease regulatory subunit 7 isoform 1 [Homo sapiens]	TDACFIR	TDAC[+418.1]FIR	TDAC#FIR	622.265	2	C236	70.02	286490400	-0.216739	BTD
NP_006358.1|	CAP1	|CAP1|10487|Q01518;D3DPU2|adenylyl cyclase-associated protein 1 [Homo sapiens]	TDGCHAYLSK	TDGC[+418.1]HAYLSK	TDGC#HAYLSK	756.816	2	C416	51.51	66459346	-0.320959	BTD
NP_006358.1|	CAP1	|CAP1|10487|Q01518;D3DPU2|adenylyl cyclase-associated protein 1 [Homo sapiens]	TDGCHAYLSK	TDGC[+418.1]HAYLSK	TDGC#HAYLSK	504.88	3	C416	51.51	404736800	-0.16073	BTD
NP_055040.2|	PPP2R1A	|PPP2R1A|5518|P30153;A8K7B7|serine/threonine-protein phosphatase 2A 65 kDa regulatory subunit A alpha isoform [Homo sapiens]	TDLVPAFQNLMKDCEAEVR	TDLVPAFQNLM[+16]KDC[+418.1]EAEVR	TDLVPAFQNLMKDC#EAEVR	871.731	3	C294	80.45	297219024	-0.211657	BTD
NP_001007215.1|	CACYBP	|CACYBP|27101|Q9HB71;B3KSF1;Q5R370|calcyclin-binding protein isoform 2 [Homo sapiens]	TDTVLILCR	TDTVLILC[+418.1]R	TDTVLILC#R	726.355	2	C111	77.86	101292920	-0.30446	BTD
NP_055571.2|	CKAP5	|CKAP5|9793|Q14008|cytoskeleton-associated protein 5 isoform b [Homo sapiens]	TEMPCQALVR	TEM[+16]PC[+418.1]QALVR	TEMPC#QALVR	791.347	2	C637	63.3	898213056	0.0730113	BTD
NP_004095.4|	FASN	|FASN|2194|P49327|fatty acid synthase [Homo sapiens]	TFCPAHK	TFC[+418.1]PAHK	TFC#PAHK	611.263	2	C1881	52.61	406669344	-0.159814	BTD
NP_004095.4|	FASN	|FASN|2194|P49327|fatty acid synthase [Homo sapiens]	TFCPAHK	TFC[+418.1]PAHK	TFC#PAHK	407.844	3	C1881	52.61	1144537088	0.189686	BTD
NP_004757.1|	COPB2	|COPB2|9276|P35606|coatomer subunit beta' [Homo sapiens]	TFEVCDLPVR	TFEVC[+418.1]DLPVR	TFEVC#DLPVR	798.863	2	C56	76	18994243	-0.343442	BTD
NP_056973.2|	MED15	|MED15|51586|Q96RN5|mediator of RNA polymerase II transcription subunit 15 isoform b [Homo sapiens]	TFVPAMTAIHGPPITAPVVCTR	TFVPAM[+16]TAIHGPPITAPVVC[+418.1]TR	TFVPAMTAIHGPPITAPVVC#TR	905.115	3	C620	72.14	101124652	-0.30454	BTD
NP_001967.3|	ENO3	|ENO3|2027|P13929;D3DTL2|beta-enolase isoform 1 [Homo sapiens]	TGAPCR	TGAPC[+418.1]R	TGAPC#R	511.713	2	C399	48.29	8118012160	3.49276	BTD
NP_000966.2|	RPL11	|RPL11|6135|P62913;Q5VVD0|60S ribosomal protein L11 isoform 1 [Homo sapiens]	TGCIGAK	TGC[+418.1]IGAK	TGC#IGAK	534.236	2	C150	53.44	392583840	-0.166486	BTD
NP_006421.2|	CCT4	|CCT4|10575|P50991|T-complex protein 1 subunit delta isoform a [Homo sapiens]	TGCNVLLIQK	TGC[+418.1]NVLLIQK	TGC#NVLLIQK	753.876	2	C295	69.91	262035536	-0.228322	BTD
NP_001022.1|	RPS28	|RPS28|6234|P62857;B2R4R9|40S ribosomal protein S28 [Homo sapiens]	TGSQGQCTQVR	TGSQGQC[+418.1]TQVR	TGSQGQC#TQVR	791.84	2	C27	47.07	777189408	0.015687	BTD
NP_000980.1|	RPL30	|RPL30|6156|P62888|60S ribosomal protein L30 [Homo sapiens]	TGVHHYSGNNIELGTACGK	TGVHHYSGNNIELGTAC[+418.1]GK	TGVHHYSGNNIELGTAC#GK	792.688	3	C85	52.76	208903888	-0.253489	BTD
NP_000980.1|	RPL30	|RPL30|6156|P62888|60S ribosomal protein L30 [Homo sapiens]	TGVHHYSGNNIELGTACGK	TGVHHYSGNNIELGTAC[+418.1]GK	TGVHHYSGNNIELGTAC#GK	594.768	4	C85	52.76	286645568	-0.216665	BTD
NP_689956.2|	BRAT1	|BRAT1|221927|Q6PJG6|BRCA1-associated ATM activator 1 [Homo sapiens]	THCPYAVALPEVAPAQPLTEALR	THC[+418.1]PYAVALPEVAPAQPLTEALR	THC#PYAVALPEVAPAQPLTEALR	955.807	3	C673	79.47	182935512	-0.265789	BTD
NP_001447.2|	FLNA	|FLNA|2316|P21333;Q60FE5;Q6NXF2|filamin-A isoform 1 [Homo sapiens]	THEAEIVEGENHTYCIR	THEAEIVEGENHTYC[+418.1]IR	THEAEIVEGENHTYC#IR	605.516	4	C2191	56.48	46144328	-0.330582	BTD
NP_004125.3|	HSPA9	|HSPA9|3313|P38646|stress-70 protein, mitochondrial precursor [Homo sapiens]	TIAPCQK	TIAPC[+418.1]QK	TIAPC#QK	589.77	2	C366	54.28	1480640384	0.348885	BTD
NP_000652.2|	RPL9	|RPL9|6133|P32969;Q53Z07|60S ribosomal protein L9 [Homo sapiens]	TICSHVQNMIK	TIC[+418.1]SHVQNM[+16]IK	TIC#SHVQNMIK	854.386	2	C74	52.96	338055608	-0.192314	BTD
NP_000652.2|	RPL9	|RPL9|6133|P32969;Q53Z07|60S ribosomal protein L9 [Homo sapiens]	TICSHVQNMIK	TIC[+418.1]SHVQNM[+16]IK	TIC#SHVQNMIK	569.927	3	C74	52.96	701505040	-0.0201619	BTD
NP_004719.2|	DDX21	|DDX21|9188|Q9NR30|nucleolar RNA helicase 2 isoform 1 [Homo sapiens]	TIIFCETKK	TIIFC[+418.1]ETKK	TIIFC#ETKK	500.912	3	C445	64.05	86932744	-0.311262	BTD
NP_005909.2|	MDH2	|MDH2|4191|P40926|malate dehydrogenase, mitochondrial precursor [Homo sapiens]	TIIPLISQCTPK	TIIPLISQC[+418.1]TPK	TIIPLISQC#TPK	866.444	2	C212	79.97	227004440	-0.244915	BTD
NP_005909.2|	MDH2	|MDH2|4191|P40926|malate dehydrogenase, mitochondrial precursor [Homo sapiens]	TIIPLISQCTPK	TIIPLISQC[+418.1]TPK	TIIPLISQC#TPK	577.965	3	C212	79.97	283697552	-0.218062	BTD
NP_002873.1|	RANBP1	|RANBP1|5902|P43487|ran-specific GTPase-activating protein [Homo sapiens]	TKFEECR	TKFEEC[+418.1]R	TKFEEC#R	665.781	2	C158	48.01	228574968	-0.244171	BTD
NP_002873.1|	RANBP1	|RANBP1|5902|P43487|ran-specific GTPase-activating protein [Homo sapiens]	TKFEECR	TKFEEC[+418.1]R	TKFEEC#R	444.19	3	C158	48.01	365198736	-0.179458	BTD
NP_001017963.2|	HSP90AA1	|HSP90AA1|3320|P07900;Q86SX1|heat shock protein HSP 90-alpha isoform 1 [Homo sapiens]	TKFENLCK	TKFENLC[+418.1]K	TKFENLC#K	700.82	2	C694	57.25	730994912	-0.00619363	BTD
NP_001017963.2|	HSP90AA1	|HSP90AA1|3320|P07900;Q86SX1|heat shock protein HSP 90-alpha isoform 1 [Homo sapiens]	TKFENLCK	TKFENLC[+418.1]K	TKFENLC#K	467.549	3	C694	57.25	1262089920	0.245366	BTD
NP_003366.2|	VDAC2	|VDAC2|7417|P45880|voltage-dependent anion-selective channel protein 2 isoform 2 [Homo sapiens]	TKSCSGVEFSTSGSSNTDTGK	TKSC[+418.1]SGVEFSTSGSSNTDTGK	TKSC#SGVEFSTSGSSNTDTGK	833.353	3	C47	51.87	363937280	-0.180055	BTD
NP_057535.1|	COPB1	|COPB1|1315|P53618|coatomer subunit beta [Homo sapiens]	TLHSCSVR	TLHSC[+418.1]SVR	TLHSC#SVR	660.795	2	C390	47.25	660256832	-0.0396996	BTD
NP_057535.1|	COPB1	|COPB1|1315|P53618|coatomer subunit beta [Homo sapiens]	TLHSCSVR	TLHSC[+418.1]SVR	TLHSC#SVR	440.866	3	C390	47.25	798617088	0.0258365	BTD
NP_005989.3|	CCT3	|CCT3|7203|P49368;B3KX11;Q59H77|T-complex protein 1 subunit gamma isoform a [Homo sapiens]	TLIQNCGASTIR	TLIQNC[+418.1]GASTIR	TLIQNC#GASTIR	847.903	2	C455	63.79	568380176	-0.0832181	BTD
NP_055791.1|	PDCD11	|PDCD11|22984|Q14690|protein RRP5 homolog [Homo sapiens]	TLLCLSLTGPHK	TLLC[+418.1]LSLTGPHK	TLLC#LSLTGPHK	567.621	3	C1218	74.84	327300416	-0.197409	BTD
NP_036473.2|	GTPBP4	|GTPBP4|23560|Q9BZE4;D2CFK9|nucleolar GTP-binding protein 1 [Homo sapiens]	TLLLCGYPNVGK	TLLLC[+418.1]GYPNVGK	TLLLC#GYPNVGK	848.415	2	C174	78.12	129514232	-0.291092	BTD
NP_057371.2|	HP1BP3	|HP1BP3|50809|Q5SSJ5|heterochromatin protein 1-binding protein 3 [Homo sapiens]	TLQKCEK	TLQKC[+418.1]EK	TLQKC#EK	634.294	2	C391	40.27	319277808	-0.201209	BTD
NP_057371.2|	HP1BP3	|HP1BP3|50809|Q5SSJ5|heterochromatin protein 1-binding protein 3 [Homo sapiens]	TLQKCEK	TLQKC[+418.1]EK	TLQKC#EK	423.199	3	C391	40.27	311200000	-0.205035	BTD
NP_065731.3|	SCYL1	|SCYL1|57410|Q96KG9|N-terminal kinase-like protein isoform A [Homo sapiens]	TLVPHYCELVGANPK	TLVPHYC[+418.1]ELVGANPK	TLVPHYC#ELVGANPK	686.997	3	C241	66.96	334805424	-0.193854	BTD
NP_003144.3|	STAT6	|STAT6|6778|P42226|signal transducer and activator of transcription 6 isoform 1 [Homo sapiens]	TLVTSCFLVEK	TLVTSC[+418.1]FLVEK	TLVTSC#FLVEK	829.402	2	C272	79.67	57817280	-0.325053	BTD
NP_056156.2|	NCAPH	|NCAPH|23397|Q15003|condensin complex subunit 2 [Homo sapiens]	TMCPLLSMK	TM[+16]C[+418.1]PLLSM[+16]K	TMC#PLLSMK	737.316	2	C418	68.43	1158748736	0.196417	BTD
NP_006089.1|	GNB2L1	|GNB2L1|10399|P63244;E9KL35|guanine nucleotide-binding protein subunit beta-2-like 1 [Homo sapiens]	TNHIGHTGYLNTVTVSPDGSLCASGGK	TNHIGHTGYLNTVTVSPDGSLC[+418.1]ASGGK	TNHIGHTGYLNTVTVSPDGSLC#ASGGK	776.86	4	C207	61.76	769534208	0.012061	BTD
NP_057651.1|	BCCIP	|BCCIP|56647|Q9P287|BRCA2 and CDKN1A-interacting protein isoform BCCIPalpha [Homo sapiens]	TNKPCGK	TNKPC[+418.1]GK	TNKPC#GK	583.26	2	C213	37.93	682759904	-0.0290407	BTD
NP_057651.1|	BCCIP	|BCCIP|56647|Q9P287|BRCA2 and CDKN1A-interacting protein isoform BCCIPalpha [Homo sapiens]	TNKPCGK	TNKPC[+418.1]GK	TNKPC#GK	389.176	3	C213	37.93	1372430208	0.29763	BTD
NP_003106.3|	UAP1	|UAP1|6675|Q16222|UDP-N-acetylhexosamine pyrophosphorylase [Homo sapiens]	TNPTEPVGVVCR	TNPTEPVGVVC[+418.1]R	TNPTEPVGVVC#R	845.39	2	C293	64.24	178015944	-0.268119	BTD
NP_001447.2|	FLNA	|FLNA|2316|P21333;Q60FE5;Q6NXF2|filamin-A isoform 1 [Homo sapiens]	TPCEEILVK	TPC[+418.1]EEILVK	TPC#EEILVK	725.341	2	C2593	68.39	554659856	-0.0897169	BTD
NP_001014.1|	RPS20	|RPS20|6224|P60866|40S ribosomal protein S20 isoform 2 [Homo sapiens]	TPCGEGSK	TPC[+418.1]GEGSK	TPC#GEGSK	598.739	2	C70	46.4	137764200	-0.287185	BTD
NP_003963.1|	BTAF1	|BTAF1|9044|O14981;Q2M1V9;Q8N6J1|TATA-binding protein-associated factor 172 [Homo sapiens]	TPCPNSK	TPC[+418.1]PNSK	TPC#PNSK	582.744	2	C914	47.49	156370112	-0.278372	BTD
NP_001177966.1|	PSMD1	|PSMD1|5707|Q99460|26S proteasome non-ATPase regulatory subunit 1 isoform 2 [Homo sapiens]	TPEQCPSVVSLLSESYNPHVR	TPEQC[+418.1]PSVVSLLSESYNPHVR	TPEQC#PSVVSLLSESYNPHVR	920.763	3	C633	80.83	84211896	-0.31255	BTD
NP_065778.3|	ZNF295	|ZNF295|49854|Q9ULJ3;Q5R2W2|zinc finger protein 295 isoform L [Homo sapiens]	TPQAPFPTCPNR	TPQAPFPTC[+418.1]PNR	TPQAPFPTC#PNR	873.89	2	C129	65.57	205536936	-0.255083	BTD
NP_065778.3|	ZNF295	|ZNF295|49854|Q9ULJ3;Q5R2W2|zinc finger protein 295 isoform L [Homo sapiens]	TPQAPFPTCPNR	TPQAPFPTC[+418.1]PNR	TPQAPFPTC#PNR	582.929	3	C129	65.57	110435052	-0.30013	BTD
NP_002931.2|	ABCE1	|ABCE1|6059|P61221|ATP-binding cassette sub-family E member 1 [Homo sapiens]	TQAIVCQQLDLTHLK	TQAIVC[+418.1]QQLDLTHLK	TQAIVC#QQLDLTHLK	710.355	3	C201	70.63	199096720	-0.258134	BTD
NP_056375.2|	OPA1	|OPA1|4976|O60313|dynamin-like 120 kDa protein, mitochondrial isoform 1 [Homo sapiens]	TQEQCVHNETK	TQEQC[+418.1]VHNETK	TQEQC#VHNETK	578.912	3	C786	40.01	169394360	-0.272203	BTD
NP_006827.1|	GCN1L1	|GCN1L1|10985|Q92616|translational activator GCN1 [Homo sapiens]	TQKCLQTLLDTK	TQKC[+418.1]LQTLLDTK	TQKC#LQTLLDTK	603.967	3	C1595	68.47	269308800	-0.224877	BTD
NP_055571.2|	CKAP5	|CKAP5|9793|Q14008|cytoskeleton-associated protein 5 isoform b [Homo sapiens]	TQMSSCVAK	TQM[+16]SSC[+418.1]VAK	TQMSSC#VAK	694.786	2	C1203	48.12	206287032	-0.254728	BTD
NP_001435.1|	FABP5	|FABP5|2171|Q01469;E7DVW5|fatty acid-binding protein, epidermal [Homo sapiens]	TQTVCNFTDGALVQHQEWDGK	TQTVC[+418.1]NFTDGALVQHQEWDGK	TQTVC#NFTDGALVQHQEWDGK	932.411	3	C87	69.71	540331760	-0.0965036	BTD
NP_001367.2|	DYNC1H1	|DYNC1H1|1778|Q14204|cytoplasmic dynein 1 heavy chain 1 [Homo sapiens]	TSAPITCELLNK	TSAPITC[+418.1]ELLNK	TSAPITC#ELLNK	854.408	2	C1999	71.53	661697440	-0.0390172	BTD
NP_000009.1|	ACADVL	|ACADVL|37|P49748|very long-chain specific acyl-CoA dehydrogenase, mitochondrial isoform 1 precursor [Homo sapiens]	TSAVPSPCGK	TSAVPSPC[+418.1]GK	TSAVPSPC#GK	682.802	2	C237	56.25	1802125504	0.501161	BTD
NP_001073867.1|	KIAA0368	|KIAA0368|23392|-|proteasome-associated protein ECM29 homolog [Homo sapiens]	TSCALTIHAIGR	TSC[+418.1]ALTIHAIGR	TSC#ALTIHAIGR	554.269	3	C1631	65.09	250413112	-0.233827	BTD
NP_003391.1|	XPO1	|XPO1|7514|O14980;B3KWD0|exportin-1 [Homo sapiens]	TSESLCQNNMVILK	TSESLC[+418.1]QNNM[+16]VILK	TSESLC#QNNMVILK	1007.46	2	C164	65.89	253763392	-0.23224	BTD
NP_003391.1|	XPO1	|XPO1|7514|O14980;B3KWD0|exportin-1 [Homo sapiens]	TSESLCQNNMVILK	TSESLC[+418.1]QNNM[+16]VILK	TSESLC#QNNMVILK	671.974	3	C164	65.89	223898696	-0.246386	BTD
NP_001121600.1|	ZEB1	|ZEB1|6935|P37275;B2RBI8;E9PCM7|zinc finger E-box-binding homeobox 1 isoform a [Homo sapiens]	TSQCSSPSLSASPGSPTRPQIR	TSQC[+418.1]SSPSLSASPGSPTRPQIR	TSQC#SSPSLSASPGSPTRPQIR	888.083	3	C295	54.26	254010352	-0.232123	BTD
NP_004991.1|	NDUFA5	|NDUFA5|4698|Q16718|NADH dehydrogenase [ubiquinone] 1 alpha subcomplex subunit 5 [Homo sapiens]	TTGLVGLAVCNTPHER	TTGLVGLAVC[+418.1]NTPHER	TTGLVGLAVC#NTPHER	696	3	C17	67.73	233527592	-0.241825	BTD
NP_001354.1|	DKC1	|DKC1|1736|O60832|H/ACA ribonucleoprotein complex subunit 4 isoform 1 [Homo sapiens]	TTHYTPLACGSNPLK	TTHYTPLAC[+418.1]GSNPLK	TTHYTPLAC#GSNPLK	1010.97	2	C74	62.23	402387328	-0.161843	BTD
NP_001354.1|	DKC1	|DKC1|1736|O60832|H/ACA ribonucleoprotein complex subunit 4 isoform 1 [Homo sapiens]	TTHYTPLACGSNPLK	TTHYTPLAC[+418.1]GSNPLK	TTHYTPLAC#GSNPLK	674.313	3	C74	62.23	683880096	-0.0285102	BTD
NP_005038.1|	PSMD5	|PSMD5|5711|Q16401|26S proteasome non-ATPase regulatory subunit 5 isoform 1 [Homo sapiens]	TTLCVSILER	TTLC[+418.1]VSILER	TTLC#VSILER	776.879	2	C64	78.36	71160570	-0.318732	BTD
NP_002442.2|	MTAP	|MTAP|4507|Q13126|S-methyl-5'-thioadenosine phosphorylase [Homo sapiens]	TTMRPQSFYDGSHSCAR	TTM[+16]RPQSFYDGSHSC[+418.1]AR	TTMRPQSFYDGSHSC#AR	595.249	4	C131	47.9	334250592	-0.194117	BTD
NP_001435.1|	FABP5	|FABP5|2171|Q01469;E7DVW5|fatty acid-binding protein, epidermal [Homo sapiens]	TTQFSCTLGEK	TTQFSC[+418.1]TLGEK	TTQFSC#TLGEK	816.855	2	C67	63.99	524045312	-0.104218	BTD
NP_001435.1|	FABP5	|FABP5|2171|Q01469;E7DVW5|fatty acid-binding protein, epidermal [Homo sapiens]	TTQFSCTLGEK	TTQFSC[+418.1]TLGEK	TTQFSC#TLGEK	544.906	3	C67	63.99	127479688	-0.292056	BTD
NP_001435.1|	FABP5	|FABP5|2171|Q01469;E7DVW5|fatty acid-binding protein, epidermal [Homo sapiens]	TTQFSCTLGEKFEETTADGR	TTQFSC[+418.1]TLGEKFEETTADGR	TTQFSC#TLGEKFEETTADGR	880.384	3	C67	69.15	137143416	-0.287479	BTD
NP_002905.2|	RFC2	|RFC2|5982|P35250;Q75MT5|replication factor C subunit 2 isoform 2 [Homo sapiens]	TTSILCLAR	TTSILC[+418.1]LAR	TTSILC#LAR	698.342	2	C88	74.31	283683984	-0.218068	BTD
NP_002905.2|	RFC2	|RFC2|5982|P35250;Q75MT5|replication factor C subunit 2 isoform 2 [Homo sapiens]	TTSILCLAR	TTSILC[+418.1]LAR	TTSILC#LAR	465.897	3	C88	74.31	47165962	-0.330098	BTD
NP_065801.1|	XPO5	|XPO5|57510|Q9HAV4|exportin-5 [Homo sapiens]	TTSQLCWPLLK	TTSQLC[+418.1]WPLLK	TTSQLC#WPLLK	854.415	2	C1052	83.61	130865756	-0.290452	BTD
NP_065801.1|	XPO5	|XPO5|57510|Q9HAV4|exportin-5 [Homo sapiens]	TTSQLCWPLLK	TTSQLC[+418.1]WPLLK	TTSQLC#WPLLK	569.946	3	C1052	83.61	78770092	-0.315128	BTD
NP_006377.2|	DDX17	|DDX17|10521|Q92841|probable ATP-dependent RNA helicase DDX17 isoform 1 [Homo sapiens]	TTSSANNPNLMYQDECDRR	TTSSANNPNLM[+16]YQDEC[+418.1]DRR	TTSSANNPNLMYQDEC#DRR	883.697	3	C584	50.44	450010560	-0.139285	BTD
NP_001193496.1|	IFI16	|IFI16|3428|Q16666;B4DJT8;H3BLV7|gamma-interferon-inducible protein 16 isoform 1 [Homo sapiens]	TVAKCQVTPR	TVAKC[+418.1]QVTPR	TVAKC#QVTPR	760.871	2	C135	47.61	299610336	-0.210524	BTD
NP_001193496.1|	IFI16	|IFI16|3428|Q16666;B4DJT8;H3BLV7|gamma-interferon-inducible protein 16 isoform 1 [Homo sapiens]	TVAKCQVTPR	TVAKC[+418.1]QVTPR	TVAKC#QVTPR	507.583	3	C135	47.61	995096160	0.118901	BTD
NP_909122.1|	RBM39	|RBM39|9584|Q14498|RNA-binding protein 39 isoform a [Homo sapiens]	TVFCMQLAAR	TVFC[+418.1]M[+16]QLAAR	TVFC#MQLAAR	787.352	2	C157	68.37	74812942	-0.317002	BTD
NP_003866.1|	GMPS	|GMPS|8833|P49915;A8K639|GMP synthase [glutamine-hydrolyzing] [Homo sapiens]	TVGVQGDCR	TVGVQGDC[+418.1]R	TVGVQGDC#R	676.79	2	C523	52.47	367440928	-0.178396	BTD
NP_002784.1|	PSMB1	|PSMB1|5689|P20618|proteasome subunit beta type-1 [Homo sapiens]	TVIGCSGFHGDCLTLTK	TVIGC[+57]SGFHGDC[+418.1]LTLTK	TVIGCSGFHGDC#LTLTK	743.004	3	C89	68.1	349213776	-0.187029	BTD
NP_076968.2|	SPATA5L1	|SPATA5L1|79029|Q9BVQ7|spermatogenesis-associated protein 5-like protein 1 [Homo sapiens]	TVKPSLSCK	TVKPSLSC[+418.1]K	TVKPSLSC#K	460.893	3	C732	51.25	219745496	-0.248353	BTD
NP_002379.3|	MCM3	|MCM3|4172|-|DNA replication licensing factor MCM3 isoform 1 [Homo sapiens]	TVLIACNVK	TVLIAC[+418.1]NVK	TVLIAC#NVK	689.847	2	C308	68.53	322399216	-0.19973	BTD
NP_056175.3|	SKIV2L2	|SKIV2L2|23517|P42285;Q3MHC9|superkiller viralicidic activity 2-like 2 [Homo sapiens]	TVLQMDELKCR	TVLQM[+16]DELKC[+418.1]R	TVLQMDELKC#R	590.605	3	C853	57.08	225542656	-0.245607	BTD
NP_056315.1|	C2CD2	|C2CD2|25966|Q9Y426|C2 domain-containing protein 2 isoform 1 precursor [Homo sapiens]	TVMPCGTVVTTVTAVK	TVM[+16]PC[+418.1]GTVVTTVTAVK	TVMPC#GTVVTTVTAVK	1020.99	2	C413	69.93	435629664	-0.146097	BTD
NP_005753.1|	TRIM28	|TRIM28|10155|Q13263|transcription intermediary factor 1-beta [Homo sapiens]	TVYCNVHK	TVYC[+418.1]NVHK	TVYC#NVHK	691.305	2	C209	49.68	274534544	-0.222402	BTD
NP_005753.1|	TRIM28	|TRIM28|10155|Q13263|transcription intermediary factor 1-beta [Homo sapiens]	TVYCNVHK	TVYC[+418.1]NVHK	TVYC#NVHK	461.206	3	C209	49.68	822276928	0.0370432	BTD
NP_001185771.1|	CCT2	|CCT2|10576|P78371|T-complex protein 1 subunit beta isoform 2 [Homo sapiens]	TVYGGGCSEMLMAHAVTQLANR	TVYGGGC[+418.1]SEM[+16]LM[+16]AHAVTQLANR	TVYGGGC#SEMLMAHAVTQLANR	920.406	3	C365	63	307424352	-0.206823	BTD
NP_001015.1|	RPS21	|RPS21|6227|P63220;Q6FGH5|40S ribosomal protein S21 [Homo sapiens]	TYAICGAIR	TYAIC[+418.1]GAIR	TYAIC#GAIR	693.321	2	C56	68.94	1274529792	0.251258	BTD
NP_060918.2|	CAND1	|CAND1|55832|Q86VP6|cullin-associated NEDD8-dissociated protein 1 [Homo sapiens]	TYIQCIAAISR	TYIQC[+418.1]IAAISR	TYIQC#IAAISR	828.897	2	C237	78.57	50524693	-0.328507	BTD
NP_009191.1|	LYPLA2	|LYPLA2|11313|O95372|acyl-protein thioesterase 2 [Homo sapiens]	TYPGVMHSSCPQEMAAVK	TYPGVM[+16]HSSC[+418.1]PQEM[+16]AAVK	TYPGVMHSSC#PQEMAAVK	1193.5	2	C213	49.93	128112088	-0.291757	BTD
NP_009191.1|	LYPLA2	|LYPLA2|11313|O95372|acyl-protein thioesterase 2 [Homo sapiens]	TYPGVMHSSCPQEMAAVK	TYPGVM[+16]HSSC[+418.1]PQEM[+16]AAVK	TYPGVMHSSC#PQEMAAVK	796.004	3	C213	49.93	2099265664	0.641905	BTD
NP_002262.3|	IPO5	|IPO5|3843|O00410;B3KWG6;Q9BVS9|importin-5 [Homo sapiens]	VAAAESMPLLLECAR	VAAAESM[+16]PLLLEC[+418.1]AR	VAAAESMPLLLEC#AR	669.983	3	C751	74.94	68466908	-0.320008	BTD
NP_055427.2|	FAM120A	|FAM120A|23196|Q9NZB2|constitutive coactivator of PPAR-gamma-like protein 1 [Homo sapiens]	VAAASGHCGAFSGSDSSR	VAAASGHC[+418.1]GAFSGSDSSR	VAAASGHC#GAFSGSDSSR	695.623	3	C919	50.37	227124816	-0.244858	BTD
NP_055899.2|	MRPS27	|MRPS27|23107|Q92552|28S ribosomal protein S27, mitochondrial [Homo sapiens]	VAASPEDIKLCR	VAASPEDIKLC[+418.1]R	VAASPEDIKLC#R	573.945	3	C276	62.5	338936584	-0.191897	BTD
NP_005052.1|	RPL3L	|RPL3L|6123|Q92901|60S ribosomal protein L3-like [Homo sapiens]	VACIGAWHPAR	VAC[+418.1]IGAWHPAR	VAC#IGAWHPAR	799.871	2	C253	63.96	937133824	0.0914466	BTD
NP_005052.1|	RPL3L	|RPL3L|6123|Q92901|60S ribosomal protein L3-like [Homo sapiens]	VACIGAWHPAR	VAC[+418.1]IGAWHPAR	VAC#IGAWHPAR	533.583	3	C253	63.96	3991567872	1.53822	BTD
NP_002941.1|	RPN1	|RPN1|6184|P04843|dolichyl-diphosphooligosaccharide--protein glycosyltransferase subunit 1 precursor [Homo sapiens]	VACITEQVLTLVNK	VAC[+418.1]ITEQVLTLVNK	VAC#ITEQVLTLVNK	974.997	2	C477	93.64	44634950	-0.331297	BTD
NP_002941.1|	RPN1	|RPN1|6184|P04843|dolichyl-diphosphooligosaccharide--protein glycosyltransferase subunit 1 precursor [Homo sapiens]	VACITEQVLTLVNK	VAC[+418.1]ITEQVLTLVNK	VAC#ITEQVLTLVNK	650.334	3	C477	93.64	97958840	-0.306039	BTD
NP_008996.1|	CDC37	|CDC37|11140|Q16543|hsp90 co-chaperone Cdc37 [Homo sapiens]	VAECQR	VAEC[+418.1]QR	VAEC#QR	562.237	2	C64	46.36	100670124	-0.304755	BTD
NP_115867.2|	MRPL38	|MRPL38|64978|Q96DV4|39S ribosomal protein L38, mitochondrial [Homo sapiens]	VAEGQVTCPYLPPFPAR	VAEGQVTC[+418.1]PYLPPFPAR	VAEGQVTC#PYLPPFPAR	755.027	3	C252	80.28	183198688	-0.265664	BTD
NP_057951.1|	RALY	|RALY|22913|Q9UKM9;Q53GL6|RNA-binding protein Raly isoform 1 [Homo sapiens]	VAGCSVHK	VAGC[+418.1]SVHK	VAGC#SVHK	609.773	2	C51	45.19	524542992	-0.103982	BTD
NP_057951.1|	RALY	|RALY|22913|Q9UKM9;Q53GL6|RNA-binding protein Raly isoform 1 [Homo sapiens]	VAGCSVHK	VAGC[+418.1]SVHK	VAGC#SVHK	406.851	3	C51	45.19	779042304	0.0165646	BTD
NP_005325.2|	HCFC1	|HCFC1|3054|P51610|host cell factor 1 [Homo sapiens]	VAGINACGR	VAGINAC[+418.1]GR	VAGINAC#GR	639.79	2	C1872	57	251454504	-0.233334	BTD
NP_001244955.1|	TPI1	|TPI1|7167|B7Z5D8|triosephosphate isomerase isoform 3 [Homo sapiens]	VAHALAEGLGVIACIGEK	VAHALAEGLGVIAC[+418.1]IGEK	VAHALAEGLGVIAC#IGEK	723.699	3	C45	79.49	785522688	0.0196341	BTD
NP_004727.2|	XPR1	|XPR1|9213|Q9UBH6|xenotropic and polytropic retrovirus receptor 1 isoform 1 [Homo sapiens]	VAHVEVAPFYTCK	VAHVEVAPFYTC[+418.1]K	VAHVEVAPFYTC#K	627.96	3	C188	65.78	220484136	-0.248003	BTD
NP_003900.1|	CPNE3	|CPNE3|8895|O75131;Q05DL8|copine-3 [Homo sapiens]	VALNVSCANLLDK	VALNVSC[+418.1]ANLLDK	VALNVSC#ANLLDK	889.434	2	C15	74.5	83642328	-0.31282	BTD
NP_056473.2|	NOC2L	|NOC2L|26155|Q9Y3T9|nucleolar complex protein 2 homolog [Homo sapiens]	VANYCR	VANYC[+418.1]R	VANYC#R	572.239	2	C567	54.08	549143584	-0.0923298	BTD
NP_009028.1|	CLTB	|CLTB|1212|P09497|clathrin light chain B isoform b [Homo sapiens]	VAQLCDFNPK	VAQLC[+418.1]DFNPK	VAQLC#DFNPK	776.85	2	C199	68.61	169510488	-0.272148	BTD
NP_004374.1|	CSK	|CSK|1445|P41240;B2R6Q4|tyrosine-protein kinase CSK [Homo sapiens]	VAVKCIK	VAVKC[+418.1]IK	VAVKC#IK	589.807	2	C223	51.88	126531676	-0.292505	BTD
NP_004374.1|	CSK	|CSK|1445|P41240;B2R6Q4|tyrosine-protein kinase CSK [Homo sapiens]	VAVKCIK	VAVKC[+418.1]IK	VAVKC#IK	393.54	3	C223	51.88	227691568	-0.24459	BTD
NP_001014.1|	RPS20	|RPS20|6224|P60866|40S ribosomal protein S20 isoform 2 [Homo sapiens]	VCADLIR	VC[+418.1]ADLIR	VC#ADLIR	604.284	2	C36	65.68	1348075648	0.286094	BTD
NP_059830.1|	WDR1	|WDR1|9948|O75083|WD repeat-containing protein 1 isoform 1 [Homo sapiens]	VCALGGSK	VC[+418.1]ALGGSK	VC#ALGGSK	576.762	2	C225	58.31	109946588	-0.300361	BTD
NP_001307.2|	CSE1L	|CSE1L|1434|P55060|exportin-2 isoform 1 [Homo sapiens]	VCASVTFK	VC[+418.1]ASVTFK	VC#ASVTFK	636.791	2	C61	63.64	262976752	-0.227876	BTD
NP_001012.1|	RPS17	|RPS17|6218|P0CW22;P08708|40S ribosomal protein S17 [Homo sapiens]	VCEEIAIIPSK	VC[+418.1]EEIAIIPSK	VC#EEIAIIPSK	810.394	2	C35	71.09	378977856	-0.172931	BTD
NP_001012.1|	RPS17	|RPS17|6218|P0CW22;P08708|40S ribosomal protein S17 [Homo sapiens]	VCEEIAIIPSKK	VC[+418.1]EEIAIIPSKK	VC#EEIAIIPSKK	583.297	3	C35	64.12	1450181824	0.334458	BTD
NP_002433.1|	MSI1	|MSI1|4440|O43347|RNA-binding protein Musashi homolog 1 [Homo sapiens]	VCEIHFHEINNK	VC[+418.1]EIHFHEINNK	VC#EIHFHEINNK	634.287	3	C167	56.97	287965920	-0.21604	BTD
NP_002433.1|	MSI1	|MSI1|4440|O43347|RNA-binding protein Musashi homolog 1 [Homo sapiens]	VCEIHFHEINNK	VC[+418.1]EIHFHEINNK	VC#EIHFHEINNK	475.967	4	C167	56.97	687577408	-0.0267589	BTD
NP_006316.1|	RAN	|RAN|5901|P62826;A8K3Z8|GTP-binding nuclear protein Ran [Homo sapiens]	VCENIPIVLCGNK	VC[+418.1]ENIPIVLC[+57]GNK	VC#ENIPIVLCGNK	938.941	2	C112	73.62	371488544	-0.176478	BTD
NP_006316.1|	RAN	|RAN|5901|P62826;A8K3Z8|GTP-binding nuclear protein Ran [Homo sapiens]	VCENIPIVLCGNK	VC[+418.1]ENIPIVLC[+57]GNK	VC#ENIPIVLCGNK	626.297	3	C112	73.62	264284696	-0.227257	BTD
NP_000099.2|	DLD	|DLD|1738|P09622|dihydrolipoyl dehydrogenase, mitochondrial precursor [Homo sapiens]	VCHAHPTLSEAFR	VC[+418.1]HAHPTLSEAFR	VC#HAHPTLSEAFR	943.427	2	C484	55.29	134202244	-0.288872	BTD
NP_000099.2|	DLD	|DLD|1738|P09622|dihydrolipoyl dehydrogenase, mitochondrial precursor [Homo sapiens]	VCHAHPTLSEAFR	VC[+418.1]HAHPTLSEAFR	VC#HAHPTLSEAFR	629.287	3	C484	55.29	1229027584	0.229706	BTD
NP_000099.2|	DLD	|DLD|1738|P09622|dihydrolipoyl dehydrogenase, mitochondrial precursor [Homo sapiens]	VCHAHPTLSEAFR	VC[+418.1]HAHPTLSEAFR	VC#HAHPTLSEAFR	472.217	4	C484	55.29	1280602624	0.254135	BTD
NP_008835.5|	PRKDC	|PRKDC|5591|P78527|DNA-dependent protein kinase catalytic subunit isoform 1 [Homo sapiens]	VCLDIIYK	VC[+418.1]LDIIYK	VC#LDIIYK	692.836	2	C2435	76.2	81108800	-0.31402	BTD
NP_005435.1|	RQCD1	|RQCD1|9125|Q92600;D5MQE1|cell differentiation protein RCD1 homolog [Homo sapiens]	VCNALALLQCVASHPETR	VC[+418.1]NALALLQC[+57]VASHPETR	VC#NALALLQCVASHPETR	800.713	3	C91	85.07	191971872	-0.261509	BTD
NP_006588.1|	HSPA8	|HSPA8|3312|P11142;Q53HF2|heat shock cognate 71 kDa protein isoform 1 [Homo sapiens]	VCNPIITK	VC[+418.1]NPIITK	VC#NPIITK	653.32	2	C603	62.53	16013209088	7.23242	BTD
NP_000980.1|	RPL30	|RPL30|6156|P62888|60S ribosomal protein L30 [Homo sapiens]	VCTLAIIDPGDSDIIR	VC[+418.1]TLAIIDPGDSDIIR	VC#TLAIIDPGDSDIIR	707.011	3	C92	85.44	167389472	-0.273152	BTD
NP_001186318.1|	EPB41L2	|EPB41L2|2037|B4DJ76;E9PPD9;O60642|band 4.1-like protein 2 isoform c [Homo sapiens]	VCVEHHTFYR	VC[+418.1]VEHHTFYR	VC#VEHHTFYR	570.25	3	C488	52.04	165198776	-0.27419	BTD
NP_001186318.1|	EPB41L2	|EPB41L2|2037|B4DJ76;E9PPD9;O60642|band 4.1-like protein 2 isoform c [Homo sapiens]	VCVEHHTFYR	VC[+418.1]VEHHTFYR	VC#VEHHTFYR	427.939	4	C488	52.04	191286072	-0.261833	BTD
NP_006316.1|	RAN	|RAN|5901|P62826;A8K3Z8|GTP-binding nuclear protein Ran [Homo sapiens]	VCENIPIVLCGNK	VC[+57]ENIPIVLC[+418.1]GNK	VCENIPIVLC#GNK	938.941	2	C120	76.51	125099864	-0.293183	BTD
NP_005435.1|	RQCD1	|RQCD1|9125|Q92600;D5MQE1|cell differentiation protein RCD1 homolog [Homo sapiens]	VCNALALLQCVASHPETR	VC[+57]NALALLQC[+418.1]VASHPETR	VCNALALLQC#VASHPETR	800.713	3	C99	80.81	79427788	-0.314817	BTD
NP_006351.2|	EIF3M	|EIF3M|10480|Q7L2H7|eukaryotic translation initiation factor 3 subunit M [Homo sapiens]	VDAHRCIVR	VDAHRC[+418.1]IVR	VDAHRC#IVR	496.24	3	C207	52.22	1082363136	0.160236	BTD
NP_006351.2|	EIF3M	|EIF3M|10480|Q7L2H7|eukaryotic translation initiation factor 3 subunit M [Homo sapiens]	VDAHRCIVR	VDAHRC[+418.1]IVR	VDAHRC#IVR	372.432	4	C207	52.22	444213664	-0.142031	BTD
NP_006004.2|	RPL10	|RPL10|6134|P27635|60S ribosomal protein L10 isoform a [Homo sapiens]	VDEFPLCGHMVSDEYEQLSSEALEAAR	VDEFPLC[+418.1]GHM[+16]VSDEYEQLSSEALEAAR	VDEFPLC#GHMVSDEYEQLSSEALEAAR	1153.83	3	C49	83.75	62441832	-0.322862	BTD
NP_003303.2|	TST	|TST|7263|Q16762|thiosulfate sulfurtransferase [Homo sapiens]	VDLSQPLIATCR	VDLSQPLIATC[+418.1]R	VDLSQPLIATC#R	867.421	2	C248	75.36	633939936	-0.0521649	BTD
NP_003303.2|	TST	|TST|7263|Q16762|thiosulfate sulfurtransferase [Homo sapiens]	VDLSQPLIATCR	VDLSQPLIATC[+418.1]R	VDLSQPLIATC#R	578.616	3	C248	75.36	359775440	-0.182026	BTD
NP_000170.1|	MSH6	|MSH6|2956|P52701;Q3SWU9|DNA mismatch repair protein Msh6 [Homo sapiens]	VDTCHTPFGK	VDTC[+418.1]HTPFGK	VDTC#HTPFGK	508.22	3	C765	56.65	157917024	-0.277639	BTD
NP_788955.1|	PSME1	|PSME1|5720|Q06323;A6NJG9;Q86SZ9|proteasome activator complex subunit 1 isoform 2 [Homo sapiens]	VDVFREDLCTK	VDVFREDLC[+418.1]TK	VDVFREDLC#TK	581.601	3	C22	65.78	640269728	-0.0491667	BTD
NP_002783.1|	PSMA7	|PSMA7|5688|O14818|proteasome subunit alpha type-7 [Homo sapiens]	VECQSHR	VEC[+418.1]QSHR	VEC#QSHR	638.764	2	C91	39.79	260571512	-0.229016	BTD
NP_002783.1|	PSMA7	|PSMA7|5688|O14818|proteasome subunit alpha type-7 [Homo sapiens]	VECQSHR	VEC[+418.1]QSHR	VEC#QSHR	426.178	3	C91	39.79	736157760	-0.00374819	BTD
NP_001242941.1|	MYH10	|MYH10|4628|P35580;F8VTL3;G1UI33;Q4LE45;Q9BWG0|myosin-10 isoform 1 [Homo sapiens]	VEDMAELTCLNEASVLHNLK	VEDM[+16]AELTC[+418.1]LNEASVLHNLK	VEDMAELTC#LNEASVLHNLK	888.41	3	C95	76.05	909203872	0.0782173	BTD
NP_001242941.1|	MYH10	|MYH10|4628|P35580;F8VTL3;G1UI33;Q4LE45;Q9BWG0|myosin-10 isoform 1 [Homo sapiens]	VEDMAELTCLNEASVLHNLK	VEDM[+16]AELTC[+418.1]LNEASVLHNLK	VEDMAELTC#LNEASVLHNLK	666.559	4	C95	76.05	276149504	-0.221637	BTD
NP_000971.1|	RPL18A	|RPL18A|6142|Q02543|60S ribosomal protein L18a [Homo sapiens]	VEEIAASKCR	VEEIAASKC[+418.1]R	VEEIAASKC#R	762.353	2	C137	48.53	285986888	-0.216977	BTD
NP_000971.1|	RPL18A	|RPL18A|6142|Q02543|60S ribosomal protein L18a [Homo sapiens]	VEEIAASKCR	VEEIAASKC[+418.1]R	VEEIAASKC#R	508.571	3	C137	48.53	932435808	0.0892214	BTD
NP_000977.1|	RPL24	|RPL24|6152|P83731|60S ribosomal protein L24 [Homo sapiens]	VELCSFSGYK	VELC[+418.1]SFSGYK	VELC#SFSGYK	775.836	2	C6	71.36	418431312	-0.154243	BTD
NP_000977.1|	RPL24	|RPL24|6152|P83731|60S ribosomal protein L24 [Homo sapiens]	VELCSFSGYK	VELC[+418.1]SFSGYK	VELC#SFSGYK	517.56	3	C6	71.36	87076584	-0.311194	BTD
NP_006294.2|	AIMP2	|AIMP2|7965|Q13155|aminoacyl tRNA synthase complex-interacting multifunctional protein 2 [Homo sapiens]	VELPTCMYR	VELPTC[+418.1]M[+16]YR	VELPTC#MYR	773.33	2	C23	66.11	633759968	-0.0522502	BTD
NP_001157108.1|	GTF2I	|GTF2I|2969|P78347;Q499G6|general transcription factor II-I isoform 5 [Homo sapiens]	VENLFNEKCGEALGLK	VENLFNEKC[+418.1]GEALGLK	VENLFNEKC#GEALGLK	728.015	3	C723	73.31	287786960	-0.216125	BTD
NP_665735.1|	MGST1	|MGST1|4257|P10620|microsomal glutathione S-transferase 1 isoform a [Homo sapiens]	VFANPEDCVAFGK	VFANPEDC[+418.1]VAFGK	VFANPEDC#VAFGK	907.897	2	C50	72.76	517224480	-0.107449	BTD
NP_665735.1|	MGST1	|MGST1|4257|P10620|microsomal glutathione S-transferase 1 isoform a [Homo sapiens]	VFANPEDCVAFGK	VFANPEDC[+418.1]VAFGK	VFANPEDC#VAFGK	605.601	3	C50	72.76	341547344	-0.19066	BTD
NP_001230587.1|	GLRX	|GLRX|2745|P35754|glutaredoxin-1 [Homo sapiens]	VFIGKDCIGGCSDLVSLQQSGELLTR	VFIGKDC[+418.1]IGGC[+57]SDLVSLQQSGELLTR	VFIGKDC#IGGCSDLVSLQQSGELLTR	1071.85	3	C79	79.3	528793088	-0.101969	BTD
NP_001230587.1|	GLRX	|GLRX|2745|P35754|glutaredoxin-1 [Homo sapiens]	VFIGKDCIGGCSDLVSLQQSGELLTR	VFIGKDC[+418.1]IGGC[+57]SDLVSLQQSGELLTR	VFIGKDC#IGGCSDLVSLQQSGELLTR	804.14	4	C79	79.3	128916444	-0.291376	BTD
NP_000977.1|	RPL24	|RPL24|6152|P83731|60S ribosomal protein L24 [Homo sapiens]	VFQFLNAKCESAFLSK	VFQFLNAKC[+418.1]ESAFLSK	VFQFLNAKC#ESAFLSK	750.696	3	C36	79.26	95245564	-0.307324	BTD
NP_004184.1|	GBF1	|GBF1|8729|Q92538|Golgi-specific brefeldin A-resistance guanine nucleotide exchange factor 1 isoform 1 [Homo sapiens]	VGCVWQTVR	VGC[+418.1]VWQTVR	VGC#VWQTVR	733.339	2	C1173	71.58	136714988	-0.287682	BTD
NP_777614.1|	ATP2A3	|ATP2A3|489|Q93084;A8K9K1|sarcoplasmic/endoplasmic reticulum calcium ATPase 3 isoform d [Homo sapiens]	VGEATETALTCLVEK	VGEATETALTC[+418.1]LVEK	VGEATETALTC#LVEK	661.313	3	C447	75.68	261477408	-0.228586	BTD
NP_002005.1|	FKBP4	|FKBP4|2288|Q02790|peptidyl-prolyl cis-trans isomerase FKBP4 [Homo sapiens]	VGEVCHITCKPEYAYGSAGSPPK	VGEVC[+418.1]HITC[+57]KPEYAYGSAGSPPK	VGEVC#HITCKPEYAYGSAGSPPK	956.765	3	C103	55.03	126087428	-0.292716	BTD
NP_002005.1|	FKBP4	|FKBP4|2288|Q02790|peptidyl-prolyl cis-trans isomerase FKBP4 [Homo sapiens]	VGEVCHITCKPEYAYGSAGSPPK	VGEVC[+57]HITC[+418.1]KPEYAYGSAGSPPK	VGEVCHITC#KPEYAYGSAGSPPK	956.765	3	C107	54.39	99881788	-0.305128	BTD
NP_000875.2|	IMPDH2	|IMPDH2|3615|P12268|inosine-5'-monophosphate dehydrogenase 2 [Homo sapiens]	VGMGSGSICITQEVLACGR	VGM[+16]GSGSIC[+418.1]ITQEVLAC[+57]GR	VGMGSGSIC#ITQEVLACGR	791.355	3	C331	79.84	96120812	-0.30691	BTD
NP_000875.2|	IMPDH2	|IMPDH2|3615|P12268|inosine-5'-monophosphate dehydrogenase 2 [Homo sapiens]	VGMGSGSICITQEVLACGRPQATAVYK	VGM[+16]GSGSIC[+418.1]ITQEVLAC[+57]GRPQATAVYK	VGMGSGSIC#ITQEVLACGRPQATAVYK	1077.51	3	C331	76.71	64886516	-0.321704	BTD
NP_001447.2|	FLNA	|FLNA|2316|P21333;Q60FE5;Q6NXF2|filamin-A isoform 1 [Homo sapiens]	VGTECGNQK	VGTEC[+418.1]GNQK	VGTEC#GNQK	677.282	2	C574	45.85	375732576	-0.174468	BTD
NP_005862.1|	SMNDC1	|SMNDC1|10285|O75940|survival of motor neuron-related-splicing factor 30 [Homo sapiens]	VGVGTCGIADKPMTQYQDTSK	VGVGTC[+418.1]GIADKPM[+16]TQYQDTSK	VGVGTC#GIADKPMTQYQDTSK	878.394	3	C214	56.04	281664864	-0.219024	BTD
NP_001508.1|	GTF2H4	|GTF2H4|2968|Q92759;Q76KU4|general transcription factor IIH subunit 4 [Homo sapiens]	VHLQCR	VHLQC[+418.1]R	VHLQC#R	587.268	2	C16	49.68	138549912	-0.286813	BTD
NP_001508.1|	GTF2H4	|GTF2H4|2968|Q92759;Q76KU4|general transcription factor IIH subunit 4 [Homo sapiens]	VHLQCR	VHLQC[+418.1]R	VHLQC#R	391.848	3	C16	49.68	274227200	-0.222547	BTD
NP_001447.2|	FLNA	|FLNA|2316|P21333;Q60FE5;Q6NXF2|filamin-A isoform 1 [Homo sapiens]	VHSPSGALEECYVTEIDQDK	VHSPSGALEEC[+418.1]YVTEIDQDK	VHSPSGALEEC#YVTEIDQDK	880.053	3	C2370	68.19	119216312	-0.29597	BTD
NP_001448.2|	FLNB	|FLNB|2317|O75369|filamin-B isoform 2 [Homo sapiens]	VHSPSGAVEECHVSELEPDK	VHSPSGAVEEC[+418.1]HVSELEPDK	VHSPSGAVEEC#HVSELEPDK	642.535	4	C2333	54.91	155584512	-0.278744	BTD
NP_001485.2|	GDI2	|GDI2|2665|P50395;Q6IAT1|rab GDP dissociation inhibitor beta isoform 1 [Homo sapiens]	VICILSHPIK	VIC[+418.1]ILSHPIK	VIC#ILSHPIK	770.904	2	C302	73.65	122112352	-0.294598	BTD
NP_001485.2|	GDI2	|GDI2|2665|P50395;Q6IAT1|rab GDP dissociation inhibitor beta isoform 1 [Homo sapiens]	VICILSHPIK	VIC[+418.1]ILSHPIK	VIC#ILSHPIK	514.272	3	C302	73.65	481943856	-0.12416	BTD
NP_001193971.1|	PRMT1	|PRMT1|3276|-|protein arginine N-methyltransferase 1 isoform 4 [Homo sapiens]	VIGIECSSISDYAVK	VIGIEC[+418.1]SSISDYAVK	VIGIEC#SSISDYAVK	1001.47	2	C101	74.28	240719904	-0.238419	BTD
NP_005557.1|	LDHA	|LDHA|3939|P00338|L-lactate dehydrogenase A chain isoform 1 [Homo sapiens]	VIGSGCNLDSAR	VIGSGC[+418.1]NLDSAR	VIGSGC#NLDSAR	805.359	2	C163	58.52	593780368	-0.071187	BTD
NP_001129582.1|	CASP5	|CASP5|838|P51878|caspase-5 isoform c [Homo sapiens]	VIIVQACR	VIIVQAC[+418.1]R	VIIVQAC#R	660.334	2	C173	65.49	974351968	0.109075	BTD
NP_001646.2|	ARCN1	|ARCN1|372|P48444;B0YIW5|coatomer subunit delta isoform 1 [Homo sapiens]	VIPEYCR	VIPEYC[+418.1]R	VIPEYC#R	649.289	2	C94	61.52	242250840	-0.237693	BTD
NP_004850.1|	CLTC	|CLTC|1213|Q00610|clathrin heavy chain 1 [Homo sapiens]	VIQCFAETGQVQK	VIQC[+418.1]FAETGQVQK	VIQC#FAETGQVQK	934.937	2	C491	66.06	289777744	-0.215182	BTD
NP_722546.1|	PYCR1	|PYCR1|5831|A6NFM2;Q9HBQ4|pyrroline-5-carboxylate reductase 1, mitochondrial isoform 2 [Homo sapiens]	VIRCMTNTPVVVR	VIRC[+418.1]M[+16]TNTPVVVR	VIRC#MTNTPVVVR	641.32	3	C120	56.54	160991228	-0.276183	BTD
NP_036232.2|	DNPEP	|DNPEP|23549|Q9ULA0;Q9NV55|aspartyl aminopeptidase [Homo sapiens]	VIVKCPTSGR	VIVKC[+418.1]PTSGR	VIVKC#PTSGR	739.368	2	C154	53.81	243253336	-0.237219	BTD
NP_036232.2|	DNPEP	|DNPEP|23549|Q9ULA0;Q9NV55|aspartyl aminopeptidase [Homo sapiens]	VIVKCPTSGR	VIVKC[+418.1]PTSGR	VIVKC#PTSGR	493.248	3	C154	53.81	692076192	-0.024628	BTD
NP_001681.2|	ATP6V1A	|ATP6V1A|523|P38606|V-type proton ATPase catalytic subunit A [Homo sapiens]	VKCLGNPER	VKC[+418.1]LGNPER	VKC#LGNPER	478.56	3	C394	51.2	388709120	-0.168322	BTD
NP_036313.3|	FKBP8	|FKBP8|23770|Q14318|peptidyl-prolyl cis-trans isomerase FKBP8 [Homo sapiens]	VKCLNNLAASQLK	VKC[+418.1]LNNLAASQLK	VKC#LNNLAASQLK	607.311	3	C275	61.72	301045728	-0.209844	BTD
NP_001447.2|	FLNA	|FLNA|2316|P21333;Q60FE5;Q6NXF2|filamin-A isoform 1 [Homo sapiens]	VKCSGPGLER	VKC[+418.1]SGPGLER	VKC#SGPGLER	732.342	2	C1165	49.99	617190368	-0.0600986	BTD
NP_001447.2|	FLNA	|FLNA|2316|P21333;Q60FE5;Q6NXF2|filamin-A isoform 1 [Homo sapiens]	VKCSGPGLER	VKC[+418.1]SGPGLER	VKC#SGPGLER	488.564	3	C1165	49.99	2199416512	0.689343	BTD
NP_001447.2|	FLNA	|FLNA|2316|P21333;Q60FE5;Q6NXF2|filamin-A isoform 1 [Homo sapiens]	VKCSGPGLSPGMVR	VKC[+418.1]SGPGLSPGM[+16]VR	VKC#SGPGLSPGMVR	911.426	2	C1453	53.82	609286176	-0.0638425	BTD
NP_001447.2|	FLNA	|FLNA|2316|P21333;Q60FE5;Q6NXF2|filamin-A isoform 1 [Homo sapiens]	VKCSGPGLSPGMVR	VKC[+418.1]SGPGLSPGM[+16]VR	VKC#SGPGLSPGMVR	607.953	3	C1453	53.82	2407603200	0.787953	BTD
NP_060550.2|	VPS13C	|VPS13C|54832|Q709C8|vacuolar protein sorting-associated protein 13C isoform 1B [Homo sapiens]	VLACPFLR	VLAC[+418.1]PFLR	VLAC#PFLR	668.831	2	C2116	80.16	232036592	-0.242531	BTD
NP_009035.3|	RPL10A	|RPL10A|4736|P62906|60S ribosomal protein L10a [Homo sapiens]	VLCLAVAVGHVK	VLC[+418.1]LAVAVGHVK	VLC#LAVAVGHVK	542.955	3	C164	74.04	322653968	-0.199609	BTD
NP_001129477.1|	GART	|GART|2618|P22102|trifunctional purine biosynthetic protein adenosine-3 isoform 1 [Homo sapiens]	VLEFNCR	VLEFNC[+418.1]R	VLEFNC#R	649.786	2	C291	67.17	389580816	-0.167909	BTD
NP_001058.2|	TOP2A	|TOP2A|7153|P11388|DNA topoisomerase 2-alpha [Homo sapiens]	VLFTCFK	VLFTC[+418.1]FK	VLFTC#FK	638.299	2	C733	77.36	131042548	-0.290369	BTD
NP_006699.2|	GLO1	|GLO1|2739|Q04760|lactoylglutathione lyase [Homo sapiens]	VLGMTLIQKCDFPIMK	VLGM[+16]TLIQKC[+418.1]DFPIM[+16]K	VLGMTLIQKC#DFPIMK	763.038	3	C61	72.51	774279424	0.0143086	BTD
NP_008938.2|	CPSF6	|CPSF6|11052|Q16630|cleavage and polyadenylation specificity factor subunit 6 [Homo sapiens]	VLISSLQDCLHGIESK	VLISSLQDC[+418.1]LHGIESK	VLISSLQDC#LHGIESK	720.687	3	C476	80.23	197045176	-0.259106	BTD
NP_057535.1|	COPB1	|COPB1|1315|P53618|coatomer subunit beta [Homo sapiens]	VLSECSPLMNDIFNKECR	VLSEC[+57]SPLM[+16]NDIFNKEC[+418.1]R	VLSECSPLMNDIFNKEC#R	863.713	3	C635	69.4	221240248	-0.247645	BTD
NP_987100.1|	G3BP2	|G3BP2|9908|Q9UN86|ras GTPase-activating protein-binding protein 2 isoform b [Homo sapiens]	VLSLNFSECHTK	VLSLNFSEC[+418.1]HTK	VLSLNFSEC#HTK	898.411	2	C73	65.78	90058652	-0.309781	BTD
NP_987100.1|	G3BP2	|G3BP2|9908|Q9UN86|ras GTPase-activating protein-binding protein 2 isoform b [Homo sapiens]	VLSLNFSECHTK	VLSLNFSEC[+418.1]HTK	VLSLNFSEC#HTK	599.276	3	C73	65.78	301033296	-0.20985	BTD
NP_006382.1|	IPO7	|IPO7|10527|O95373;B3KNG9|importin-7 [Homo sapiens]	VLTGVAGEDAECHAAK	VLTGVAGEDAEC[+418.1]HAAK	VLTGVAGEDAEC#HAAK	994.946	2	C736	52.84	84349498	-0.312485	BTD
NP_006382.1|	IPO7	|IPO7|10527|O95373;B3KNG9|importin-7 [Homo sapiens]	VLTGVAGEDAECHAAK	VLTGVAGEDAEC[+418.1]HAAK	VLTGVAGEDAEC#HAAK	663.633	3	C736	52.84	339078304	-0.19183	BTD
NP_001177966.1|	PSMD1	|PSMD1|5707|Q99460|26S proteasome non-ATPase regulatory subunit 1 isoform 2 [Homo sapiens]	VLTMPETCR	VLTM[+16]PETC[+418.1]R	VLTMPETC#R	742.323	2	C867	55.51	566538352	-0.0840905	BTD
NP_004081.1|	DUSP3	|DUSP3|1845|P51452|dual specificity protein phosphatase 3 [Homo sapiens]	VLVHCR	VLVHC[+418.1]R	VLVHC#R	572.773	2	C124	51.08	10008845824	4.38838	BTD
NP_004081.1|	DUSP3	|DUSP3|1845|P51452|dual specificity protein phosphatase 3 [Homo sapiens]	VLVHCR	VLVHC[+418.1]R	VLVHC#R	382.185	3	C124	51.08	17638298112	8.00216	BTD
NP_858058.1|	OGT	|OGT|8473|O15294|UDP-N-acetylglucosamine--peptide N-acetylglucosaminyltransferase 110 kDa subunit isoform 1 [Homo sapiens]	VMAEANHFIDLSQIPCNGK	VM[+16]AEANHFIDLSQIPC[+418.1]NGK	VMAEANHFIDLSQIPC#NGK	841.048	3	C620	72.33	151090368	-0.280873	BTD
NP_004729.1|	VAPB	|VAPB|9217|O95292;Q53XM7|vesicle-associated membrane protein-associated protein B/C isoform 1 [Homo sapiens]	VMEECK	VM[+16]EEC[+418.1]K	VMEEC#K	586.725	2	C173	46.01	220326784	-0.248078	BTD
NP_004729.1|	VAPB	|VAPB|9217|O95292;Q53XM7|vesicle-associated membrane protein-associated protein B/C isoform 1 [Homo sapiens]	VMEECKR	VM[+16]EEC[+418.1]KR	VMEEC#KR	443.519	3	C173	39.16	206704792	-0.25453	BTD
NP_002152.2|	IARS	|IARS|3376|P41252|isoleucine--tRNA ligase, cytoplasmic [Homo sapiens]	VMPFSTACNTPLSNFESHQNYK	VM[+16]PFSTAC[+418.1]NTPLSNFESHQNYK	VMPFSTAC#NTPLSNFESHQNYK	983.76	3	C185	72.23	128916124	-0.291376	BTD
NP_005745.1|	G3BP1	|G3BP1|10146|Q13283;Q5HYE9;Q5U0Q1;Q6ZP53|ras GTPase-activating protein-binding protein 1 [Homo sapiens]	VMSQNFTNCHTK	VM[+16]SQNFTNC[+418.1]HTK	VMSQNFTNC#HTK	922.382	2	C73	47.54	142663480	-0.284864	BTD
NP_005745.1|	G3BP1	|G3BP1|10146|Q13283;Q5HYE9;Q5U0Q1;Q6ZP53|ras GTPase-activating protein-binding protein 1 [Homo sapiens]	VMSQNFTNCHTK	VM[+16]SQNFTNC[+418.1]HTK	VMSQNFTNC#HTK	615.257	3	C73	47.54	1436181120	0.327827	BTD
NP_006187.2|	PCBP1	|PCBP1|5093|Q15365;Q53SS8|poly(rC)-binding protein 1 [Homo sapiens]	VMTIPYQPMPASSPVICAGGQDR	VM[+16]TIPYQPM[+16]PASSPVIC[+418.1]AGGQDR	VMTIPYQPMPASSPVIC#AGGQDR	956.766	3	C194	68.9	160198272	-0.276559	BTD
NP_444504.1|	GLMN	|GLMN|11146|Q92990|glomulin [Homo sapiens]	VMTLCPIETLR	VM[+16]TLC[+418.1]PIETLR	VMTLC#PIETLR	855.407	2	C375	78.29	164132600	-0.274695	BTD
NP_005882.2|	ACAT2	|ACAT2|39|Q9BWD1|acetyl-CoA acetyltransferase, cytosolic [Homo sapiens]	VNIEGGAIALGHPLGASGCR	VNIEGGAIALGHPLGASGC[+418.1]R	VNIEGGAIALGHPLGASGC#R	770.709	3	C360	67.5	578342464	-0.0784994	BTD
NP_001230106.1|	ALDOA	|ALDOA|226|P04075|fructose-bisphosphate aldolase A isoform 2 [Homo sapiens]	VNPCIGGVILFHETLYQK	VNPC[+418.1]IGGVILFHETLYQK	VNPC#IGGVILFHETLYQK	817.073	3	C127	84.97	74113498	-0.317334	BTD
NP_001598.1|	ACAA1	|ACAA1|30|P09110|3-ketoacyl-CoA thiolase, peroxisomal isoform a [Homo sapiens]	VNPLGGAVALGHPLGCTGAR	VNPLGGAVALGHPLGC[+418.1]TGAR	VNPLGGAVALGHPLGC#TGAR	760.046	3	C381	70.33	188493456	-0.263156	BTD
NP_001000.2|	RPS5	|RPS5|6193|P46782|40S ribosomal protein S5 [Homo sapiens]	VNQAIWLLCTGAR	VNQAIWLLC[+418.1]TGAR	VNQAIWLLC#TGAR	931.956	2	C155	83.47	85716280	-0.311838	BTD
NP_001000.2|	RPS5	|RPS5|6193|P46782|40S ribosomal protein S5 [Homo sapiens]	VNQAIWLLCTGAR	VNQAIWLLC[+418.1]TGAR	VNQAIWLLC#TGAR	621.64	3	C155	83.47	226991120	-0.244921	BTD
NP_001967.3|	ENO3	|ENO3|2027|P13929;D3DTL2|beta-enolase isoform 1 [Homo sapiens]	VNQIGSVTESIQACK	VNQIGSVTESIQAC[+418.1]K	VNQIGSVTESIQAC#K	997.969	2	C357	69.35	1334495488	0.279662	BTD
NP_001967.3|	ENO3	|ENO3|2027|P13929;D3DTL2|beta-enolase isoform 1 [Homo sapiens]	VNQIGSVTESIQACK	VNQIGSVTESIQAC[+418.1]K	VNQIGSVTESIQAC#K	665.649	3	C357	69.35	3385560832	1.25117	BTD
NP_001419.1|	ENO1	|ENO1|2023|P06733|alpha-enolase isoform 1 [Homo sapiens]	VNQIGSVTESLQACK	VNQIGSVTESLQAC[+418.1]K	VNQIGSVTESLQAC#K	997.969	2	C357	69.34	1327207424	0.27621	BTD
NP_001419.1|	ENO1	|ENO1|2023|P06733|alpha-enolase isoform 1 [Homo sapiens]	VNQIGSVTESLQACK	VNQIGSVTESLQAC[+418.1]K	VNQIGSVTESLQAC#K	665.649	3	C357	69.34	3382632960	1.24979	BTD
NP_000356.1|	TPI1	|TPI1|7167|P60174;Q53HE2|triosephosphate isomerase isoform 1 [Homo sapiens]	VPADTEVVCAPPTAYIDFAR	VPADTEVVC[+418.1]APPTAYIDFAR	VPADTEVVC#APPTAYIDFAR	851.731	3	C42	83.31	488592368	-0.121011	BTD
NP_005198.1|	CRKL	|CRKL|1399|P46109|crk-like protein [Homo sapiens]	VPCAYDK	VPC[+418.1]AYDK	VPC#AYDK	607.254	2	C249	55.9	368565568	-0.177863	BTD
NP_001185771.1|	CCT2	|CCT2|10576|P78371|T-complex protein 1 subunit beta isoform 2 [Homo sapiens]	VPDHHPC	VPDHHPC[+418.1]	VPDHHPC#	408.164	3	C488	46.21	274404008	-0.222464	BTD
NP_055720.3|	GLS	|GLS|2744|O94925|glutaminase kidney isoform, mitochondrial isoform 1 [Homo sapiens]	VPFCLQSCVKPLK	VPFC[+418.1]LQSC[+57]VKPLK	VPFC#LQSCVKPLK	646.321	3	C283	71.65	1635429952	0.422203	BTD
NP_055720.3|	GLS	|GLS|2744|O94925|glutaminase kidney isoform, mitochondrial isoform 1 [Homo sapiens]	VPFCLQSCVKPLK	VPFC[+57]LQSC[+418.1]VKPLK	VPFCLQSC#VKPLK	646.321	3	C287	70.54	563672992	-0.0854477	BTD
NP_067050.1|	OSTC	|OSTC|58505|Q9NRP0|oligosaccharyltransferase complex subunit OSTC isoform 1 [Homo sapiens]	VPFLVLECPNLK	VPFLVLEC[+418.1]PNLK	VPFLVLEC#PNLK	895.454	2	C14	87.01	1240084352	0.234943	BTD
NP_067050.1|	OSTC	|OSTC|58505|Q9NRP0|oligosaccharyltransferase complex subunit OSTC isoform 1 [Homo sapiens]	VPFLVLECPNLK	VPFLVLEC[+418.1]PNLK	VPFLVLEC#PNLK	597.305	3	C14	87.01	1278985984	0.253369	BTD
NP_008933.2|	ADRM1	|ADRM1|11047|Q16186|proteasomal ubiquitin receptor ADRM1 precursor [Homo sapiens]	VPQCPSGR	VPQC[+418.1]PSGR	VPQC#PSGR	631.276	2	C88	51.33	611371904	-0.0628546	BTD
NP_002037.2|	GAPDH	|GAPDH|2597|P04406|glyceraldehyde-3-phosphate dehydrogenase isoform 1 [Homo sapiens]	VPTANVSVVDLTCR	VPTANVSVVDLTC[+418.1]R	VPTANVSVVDLTC#R	946.456	2	C247	74.95	4371842688	1.71834	BTD
NP_002037.2|	GAPDH	|GAPDH|2597|P04406|glyceraldehyde-3-phosphate dehydrogenase isoform 1 [Homo sapiens]	VPTANVSVVDLTCR	VPTANVSVVDLTC[+418.1]R	VPTANVSVVDLTC#R	631.306	3	C247	74.95	5644512768	2.32116	BTD
NP_001167460.1|	RABL6	|RABL6|55684|Q3YEC7|rab-like protein 1 isoform 4 [Homo sapiens]	VPTHVPVCVLGNYR	VPTHVPVC[+418.1]VLGNYR	VPTHVPVC#VLGNYR	657.99	3	C172	71.44	622846016	-0.0574197	BTD
NP_055746.3|	PPP6R1	|PPP6R1|22870|Q9UPN7|serine/threonine-protein phosphatase 6 regulatory subunit 1 [Homo sapiens]	VQCAGGPR	VQC[+418.1]AGGPR	VQC#AGGPR	603.263	2	C455	49.13	73806668	-0.317479	BTD
NP_004915.2|	ACTN4	|ACTN4|81|O43707|alpha-actinin-4 [Homo sapiens]	VQEKCQLEINFNTLQTK	VQEKC[+418.1]QLEINFNTLQTK	VQEKC#QLEINFNTLQTK	1227.59	2	C351	71.12	50310652	-0.328608	BTD
NP_004915.2|	ACTN4	|ACTN4|81|O43707|alpha-actinin-4 [Homo sapiens]	VQEKCQLEINFNTLQTK	VQEKC[+418.1]QLEINFNTLQTK	VQEKC#QLEINFNTLQTK	818.731	3	C351	71.12	1061848000	0.150519	BTD
NP_444278.1|	MRPL53	|MRPL53|116540|Q96EL3|39S ribosomal protein L53, mitochondrial [Homo sapiens]	VQFCPFEK	VQFC[+418.1]PFEK	VQFC#PFEK	708.31	2	C21	74.29	490156000	-0.12027	BTD
NP_444278.1|	MRPL53	|MRPL53|116540|Q96EL3|39S ribosomal protein L53, mitochondrial [Homo sapiens]	VQFCPFEK	VQFC[+418.1]PFEK	VQFC#PFEK	472.542	3	C21	74.29	55490760	-0.326155	BTD
NP_056046.1|	NUP160	|NUP160|23279|Q12769|nuclear pore complex protein Nup160 [Homo sapiens]	VQNNLYHHCVINK	VQNNLYHHC[+418.1]VINK	VQNNLYHHC#VINK	667.314	3	C1309	54.58	463127456	-0.133072	BTD
NP_056046.1|	NUP160	|NUP160|23279|Q12769|nuclear pore complex protein Nup160 [Homo sapiens]	VQNNLYHHCVINK	VQNNLYHHC[+418.1]VINK	VQNNLYHHC#VINK	500.737	4	C1309	54.58	573579168	-0.0807556	BTD
NP_005144.2|	USP10	|USP10|9100|Q14694|ubiquitin carboxyl-terminal hydrolase 10 [Homo sapiens]	VQRPCTSTPMIDSFVR	VQRPC[+418.1]TSTPM[+16]IDSFVR	VQRPC#TSTPMIDSFVR	757.683	3	C456	64.3	510697440	-0.11054	BTD
NP_001367.2|	DYNC1H1	|DYNC1H1|1778|Q14204|cytoplasmic dynein 1 heavy chain 1 [Homo sapiens]	VQYPQSQACK	VQYPQSQAC[+418.1]K	VQYPQSQAC#K	785.345	2	C633	51.84	1353179904	0.288512	BTD
NP_001367.2|	DYNC1H1	|DYNC1H1|1778|Q14204|cytoplasmic dynein 1 heavy chain 1 [Homo sapiens]	VQYPQSQACK	VQYPQSQAC[+418.1]K	VQYPQSQAC#K	523.899	3	C633	51.84	742795808	-0.000603991	BTD
NP_002939.2|	RPL15	|RPL15|6138|P61313|60S ribosomal protein L15 isoform 1 [Homo sapiens]	VRCWQYR	VRC[+418.1]WQYR	VRC#WQYR	476.882	3	C27	56.44	203881992	-0.255867	BTD
NP_690902.1|	CPNE1	|CPNE1|8904|Q99829|copine-1 isoform a [Homo sapiens]	VRNCSSPEFSK	VRNC[+418.1]SSPEFSK	VRNC#SSPEFSK	557.913	3	C53	49.11	566454080	-0.0841305	BTD
NP_001180345.1|	DDX3X	|DDX3X|1654|-|ATP-dependent RNA helicase DDX3X isoform 2 [Homo sapiens]	VRPCVVYGGADIGQQIR	VRPC[+418.1]VVYGGADIGQQIR	VRPC#VVYGGADIGQQIR	750.37	3	C298	66.65	2629583744	0.893097	BTD
NP_008938.2|	CPSF6	|CPSF6|11052|Q16630|cleavage and polyadenylation specificity factor subunit 6 [Homo sapiens]	VSADDRCK	VSADDRC[+418.1]K	VSADDRC#K	437.853	3	C466	41.47	101361706	-0.304427	BTD
NP_001026859.1|	PLAA	|PLAA|9373|Q9Y263|phospholipase A-2-activating protein [Homo sapiens]	VSECCR	VSEC[+57]C[+418.1]R	VSECC#R	586.22	2	C788	46.49	135950492	-0.288044	BTD
NP_006296.1|	ANP32A	|ANP32A|8125|P39687|acidic leucine-rich nuclear phosphoprotein 32 family member A [Homo sapiens]	VSGGLEVLAEKCPNLTHLNLSGNK	VSGGLEVLAEKC[+418.1]PNLTHLNLSGNK	VSGGLEVLAEKC#PNLTHLNLSGNK	971.153	3	C87	74.99	237199312	-0.240086	BTD
NP_006296.1|	ANP32A	|ANP32A|8125|P39687|acidic leucine-rich nuclear phosphoprotein 32 family member A [Homo sapiens]	VSGGLEVLAEKCPNLTHLNLSGNK	VSGGLEVLAEKC[+418.1]PNLTHLNLSGNK	VSGGLEVLAEKC#PNLTHLNLSGNK	728.616	4	C87	74.99	883391360	0.0659908	BTD
NP_036448.1|	KPNA6	|KPNA6|23633|O60684|importin subunit alpha-7 [Homo sapiens]	VSPCLPVLSR	VSPC[+418.1]LPVLSR	VSPC#LPVLSR	744.871	2	C253	76.42	415836528	-0.155472	BTD
NP_036448.1|	KPNA6	|KPNA6|23633|O60684|importin subunit alpha-7 [Homo sapiens]	VSPCLPVLSR	VSPC[+418.1]LPVLSR	VSPC#LPVLSR	496.916	3	C253	76.42	151382260	-0.280734	BTD
NP_060555.2|	IPO9	|IPO9|55705|Q96P70|importin-9 [Homo sapiens]	VSSVALCK	VSSVALC[+418.1]K	VSSVALC#K	612.791	2	C864	62.37	295004656	-0.212706	BTD
NP_002756.1|	PRPS2	|PRPS2|5634|P11908|ribose-phosphate pyrophosphokinase 2 isoform 2 [Homo sapiens]	VTAVIPCFPYAR	VTAVIPC[+418.1]FPYAR	VTAVIPC#FPYAR	585.618	3	C91	82.78	63515222	-0.322354	BTD
NP_003124.1|	SRP9	|SRP9|6726|P49458;A8K0N0|signal recognition particle 9 kDa protein isoform 2 [Homo sapiens]	VTDDLVCLVYK	VTDDLVC[+418.1]LVYK	VTDDLVC#LVYK	562.602	3	C48	78.05	59199544	-0.324398	BTD
NP_000468.1|	ALB	|ALB|213|P02768|serum albumin preproprotein [Homo sapiens]	VTKCCTESLVNR	VTKC[+418.1]C[+57]TESLVNR	VTKC#CTESLVNR	609.944	3	C500	52.78	257304648	-0.230563	BTD
NP_001139186.1|	SAE1	|SAE1|10055|F5GXX7|SUMO-activating enzyme subunit 1 isoform c [Homo sapiens]	VVFCPVK	VVFC[+418.1]PVK	VVFC#PVK	605.293	2	C214	70.84	1938875712	0.565934	BTD
NP_112226.2|	SPRY4	|SPRY4|81848|Q9C004|protein sprouty homolog 4 isoform 1 [Homo sapiens]	VVHCQPLDLK	VVHC[+418.1]QPLDLK	VVHC#QPLDLK	785.381	2	C161	60.84	215580048	-0.250326	BTD
NP_112226.2|	SPRY4	|SPRY4|81848|Q9C004|protein sprouty homolog 4 isoform 1 [Homo sapiens]	VVHCQPLDLK	VVHC[+418.1]QPLDLK	VVHC#QPLDLK	523.923	3	C161	60.84	212049112	-0.251999	BTD
NP_055744.2|	FASTKD2	|FASTKD2|22868|Q9NYY8|FAST kinase domain-containing protein 2 [Homo sapiens]	VVLDNIHGCPLR	VVLDNIHGC[+418.1]PLR	VVLDNIHGC#PLR	877.429	2	C377	64.29	1004978208	0.123582	BTD
NP_055744.2|	FASTKD2	|FASTKD2|22868|Q9NYY8|FAST kinase domain-containing protein 2 [Homo sapiens]	VVLDNIHGCPLR	VVLDNIHGC[+418.1]PLR	VVLDNIHGC#PLR	585.289	3	C377	64.29	2587812864	0.873311	BTD
NP_000928.1|	POLR2A	|POLR2A|5430|P24928|DNA-directed RNA polymerase II subunit RPB1 [Homo sapiens]	VVLPCNLLR	VVLPC[+418.1]NLLR	VVLPC#NLLR	722.876	2	C981	81.37	159274920	-0.276996	BTD
NP_001008389.1|	CISD2	|CISD2|493856|Q8N5K1|CDGSH iron-sulfur domain-containing protein 2 [Homo sapiens]	VVNEINIEDLCLTK	VVNEINIEDLC[+418.1]LTK	VVNEINIEDLC#LTK	1010.99	2	C92	82.48	115863432	-0.297558	BTD
NP_001008389.1|	CISD2	|CISD2|493856|Q8N5K1|CDGSH iron-sulfur domain-containing protein 2 [Homo sapiens]	VVNEINIEDLCLTK	VVNEINIEDLC[+418.1]LTK	VVNEINIEDLC#LTK	674.329	3	C92	82.48	217594168	-0.249372	BTD
NP_036205.1|	CCT5	|CCT5|22948|P48643|T-complex protein 1 subunit epsilon [Homo sapiens]	VVNSCHR	VVNSC[+418.1]HR	VVNSC#HR	616.769	2	C181	39.8	425989408	-0.150663	BTD
NP_036205.1|	CCT5	|CCT5|22948|P48643|T-complex protein 1 subunit epsilon [Homo sapiens]	VVNSCHR	VVNSC[+418.1]HR	VVNSC#HR	411.515	3	C181	39.8	776238368	0.0152365	BTD
NP_001448.2|	FLNB	|FLNB|2317|O75369|filamin-B isoform 2 [Homo sapiens]	VVPCLVTPVTGR	VVPC[+418.1]LVTPVTGR	VVPC#LVTPVTGR	829.923	2	C991	77.09	313643632	-0.203877	BTD
NP_001448.2|	FLNB	|FLNB|2317|O75369|filamin-B isoform 2 [Homo sapiens]	VVPCLVTPVTGR	VVPC[+418.1]LVTPVTGR	VVPC#LVTPVTGR	553.618	3	C991	77.09	143513284	-0.284462	BTD
NP_003304.1|	TSTA3	|TSTA3|7264|Q13630|GDP-L-fucose synthase [Homo sapiens]	VVSCLSTCIFPDK	VVSC[+57]LSTC[+418.1]IFPDK	VVSCLSTC#IFPDK	943.928	2	C116	77.31	198881960	-0.258236	BTD
NP_001230587.1|	GLRX	|GLRX|2745|P35754|glutaredoxin-1 [Homo sapiens]	VVVFIKPTCPYCR	VVVFIKPTC[+57]PYC[+418.1]R	VVVFIKPTCPYC#R	667.325	3	C26	68.04	216171328	-0.250046	BTD
NP_006089.1|	GNB2L1	|GNB2L1|10399|P63244;E9KL35|guanine nucleotide-binding protein subunit beta-2-like 1 [Homo sapiens]	VWNLANCK	VWNLANC[+418.1]K	VWNLANC#K	683.308	2	C182	67.79	427096880	-0.150139	BTD
NP_002289.2|	LCP1	|LCP1|3936|P13796|plastin-2 [Homo sapiens]	WANYHLENAGCNK	WANYHLENAGC[+418.1]NK	WANYHLENAGC#NK	646.607	3	C283	56.33	284715688	-0.217579	BTD
NP_003366.2|	VDAC2	|VDAC2|7417|P45880|voltage-dependent anion-selective channel protein 2 isoform 2 [Homo sapiens]	WCEYGLTFTEK	WC[+418.1]EYGLTFTEK	WC#EYGLTFTEK	897.879	2	C76	76.45	19162005	-0.343362	BTD
NP_001449.3|	FLNC	|FLNC|2318|Q14315;Q59H94|filamin-C isoform a [Homo sapiens]	WCNEHLK	WC[+418.1]NEHLK	WC#NEHLK	674.284	2	C46	53.84	859144416	0.054506	BTD
NP_001449.3|	FLNC	|FLNC|2318|Q14315;Q59H94|filamin-C isoform a [Homo sapiens]	WCNEHLK	WC[+418.1]NEHLK	WC#NEHLK	449.858	3	C46	53.84	1643828160	0.426181	BTD
NP_919223.1|	HNRNPA3	|HNRNPA3|220988|P51991|heterogeneous nuclear ribonucleoprotein A3 [Homo sapiens]	WGTLTDCVVMR	WGTLTDC[+418.1]VVM[+16]R	WGTLTDC#VVMR	857.873	2	C64	74	150701972	-0.281057	BTD
NP_056992.4|	SRRT	|SRRT|51593|Q9BXP5|serrate RNA effector molecule homolog isoform a [Homo sapiens]	WLCPLSGK	WLC[+418.1]PLSGK	WLC#PLSGK	661.307	2	C715	78.03	55634450	-0.326087	BTD
NP_005989.3|	CCT3	|CCT3|7203|P49368;B3KX11;Q59H77|T-complex protein 1 subunit gamma isoform a [Homo sapiens]	WSSLACNIALDAVK	WSSLAC[+418.1]NIALDAVK	WSSLAC#NIALDAVK	954.953	2	C173	82.27	72414162	-0.318139	BTD
NP_002620.1|	PGAM1	|PGAM1|5223|P18669;Q6FHU2|phosphoglycerate mutase 1 [Homo sapiens]	YADLTEDQLPSCESLKDTIAR	YADLTEDQLPSC[+418.1]ESLKDTIAR	YADLTEDQLPSC#ESLKDTIAR	929.426	3	C153	73.18	401333040	-0.162342	BTD
NP_001230106.1|	ALDOA	|ALDOA|226|P04075|fructose-bisphosphate aldolase A isoform 2 [Homo sapiens]	YASICQQNGIVPIVEPEILPDGDHDLK	YASIC[+418.1]QQNGIVPIVEPEILPDGDHDLK	YASIC#QQNGIVPIVEPEILPDGDHDLK	1127.88	3	C232	81.34	96806940	-0.306585	BTD
NP_001230106.1|	ALDOA	|ALDOA|226|P04075|fructose-bisphosphate aldolase A isoform 2 [Homo sapiens]	YASICQQNGIVPIVEPEILPDGDHDLK	YASIC[+418.1]QQNGIVPIVEPEILPDGDHDLK	YASIC#QQNGIVPIVEPEILPDGDHDLK	846.159	4	C232	81.34	76057864	-0.316413	BTD
NP_001230106.1|	ALDOA	|ALDOA|226|P04075|fructose-bisphosphate aldolase A isoform 2 [Homo sapiens]	YASICQQNGIVPIVEPEILPDGDHDLKR	YASIC[+418.1]QQNGIVPIVEPEILPDGDHDLKR	YASIC#QQNGIVPIVEPEILPDGDHDLKR	885.184	4	C232	77.4	558222304	-0.0880295	BTD
NP_002694.3|	PPAT	|PPAT|5471|Q06203;A8K4H7;Q59G63|amidophosphoribosyltransferase proprotein [Homo sapiens]	YATTGKCELENCQPFVVETLHGK	YATTGKC[+418.1]ELENC[+57]QPFVVETLHGK	YATTGKC#ELENCQPFVVETLHGK	761.35	4	C100	67.17	1038057632	0.13925	BTD
NP_009210.1|	U2AF2	|U2AF2|11338|P26368|splicing factor U2AF 65 kDa subunit isoform a [Homo sapiens]	YCDPDSYHR	YC[+418.1]DPDSYHR	YC#DPDSYHR	525.199	3	C464	49.49	133605980	-0.289154	BTD
NP_573566.2|	LRPPRC	|LRPPRC|10128|P42704;E5KNY5|leucine-rich PPR motif-containing protein, mitochondrial precursor [Homo sapiens]	YCQEPR	YC[+418.1]QEPR	YC#QEPR	607.242	2	C571	49.22	298261920	-0.211163	BTD
NP_078938.2|	NAT10	|NAT10|55226|Q9H0A0|N-acetyltransferase 10 isoform a [Homo sapiens]	YCYYNETHK	YC[+418.1]YYNETHK	YC#YYNETHK	819.821	2	C105	53.7	83382754	-0.312943	BTD
NP_078938.2|	NAT10	|NAT10|55226|Q9H0A0|N-acetyltransferase 10 isoform a [Homo sapiens]	YCYYNETHK	YC[+418.1]YYNETHK	YC#YYNETHK	546.883	3	C105	53.7	365462784	-0.179332	BTD
NP_003397.1|	YWHAZ	|YWHAZ|7534|P63104;D0PNI1|14-3-3 protein zeta/delta [Homo sapiens]	YDDMAACMK	YDDM[+16]AAC[+418.1]M[+16]K	YDDMAAC#MK	749.261	2	C25	49.17	747440288	0.00159593	BTD
NP_006817.1|	YWHAQ	|YWHAQ|10971|P27348|14-3-3 protein theta [Homo sapiens]	YDDMATCMK	YDDM[+16]ATC[+418.1]M[+16]K	YDDMATC#MK	764.267	2	C25	48.37	277333104	-0.221076	BTD
NP_001093162.1|	EIF5AL1	|EIF5AL1|143244|Q6IS14|eukaryotic translation initiation factor 5A-1-like [Homo sapiens]	YEDICPSTHNMDVPNIK	YEDIC[+418.1]PSTHNM[+16]DVPNIK	YEDIC#PSTHNMDVPNIK	804.01	3	C73	62.01	296420944	-0.212035	BTD
NP_060282.1|	CHCHD3	|CHCHD3|54927|Q9NX63;A4D1N4|coiled-coil-helix-coiled-coil-helix domain-containing protein 3, mitochondrial precursor [Homo sapiens]	YESHPVCADLQAK	YESHPVC[+418.1]ADLQAK	YESHPVC#ADLQAK	626.943	3	C183	55.69	184168824	-0.265205	BTD
NP_004850.1|	CLTC	|CLTC|1213|Q00610|clathrin heavy chain 1 [Homo sapiens]	YESLELCR	YESLELC[+418.1]R	YESLELC#R	477.541	3	C436	69.53	61240082	-0.323431	BTD
NP_062543.1|	HNRNPH2	|HNRNPH2|3188|P55795|heterogeneous nuclear ribonucleoprotein H2 [Homo sapiens]	YGDGGSSFQSTTGHCVHMR	YGDGGSSFQSTTGHC[+418.1]VHM[+16]R	YGDGGSSFQSTTGHC#VHMR	615.999	4	C290	47.31	530471760	-0.101174	BTD
NP_005511.1|	HNRNPH1	|HNRNPH1|3187|P31943|heterogeneous nuclear ribonucleoprotein H [Homo sapiens]	YGDGGSTFQSTTGHCVHMR	YGDGGSTFQSTTGHC[+418.1]VHM[+16]R	YGDGGSTFQSTTGHC#VHMR	619.503	4	C290	48.05	668214784	-0.0359302	BTD
NP_817092.1|	PPM1G	|PPM1G|5496|O15355;Q6IAU5|protein phosphatase 1G [Homo sapiens]	YGQNCHK	YGQNC[+418.1]HK	YGQNC#HK	634.253	2	C164	38	159782192	-0.276756	BTD
NP_817092.1|	PPM1G	|PPM1G|5496|O15355;Q6IAU5|protein phosphatase 1G [Homo sapiens]	YGQNCHK	YGQNC[+418.1]HK	YGQNC#HK	423.171	3	C164	38	405871200	-0.160193	BTD
NP_002782.1|	PSMA6	|PSMA6|5687|P60900|proteasome subunit alpha type-6 [Homo sapiens]	YGYEIPVDMLCK	YGYEIPVDM[+16]LC[+418.1]K	YGYEIPVDMLC#K	932.901	2	C115	78	40575554	-0.333219	BTD
NP_002782.1|	PSMA6	|PSMA6|5687|P60900|proteasome subunit alpha type-6 [Homo sapiens]	YGYEIPVDMLCK	YGYEIPVDM[+16]LC[+418.1]K	YGYEIPVDMLC#K	622.27	3	C115	78	66138648	-0.321111	BTD
NP_055791.1|	PDCD11	|PDCD11|22984|Q14690|protein RRP5 homolog [Homo sapiens]	YHIGDEVKCR	YHIGDEVKC[+418.1]R	YHIGDEVKC#R	546.578	3	C505	51.15	132569616	-0.289645	BTD
NP_001003810.1|	HNRNPD	|HNRNPD|3184|Q14103|heterogeneous nuclear ribonucleoprotein D0 isoform d [Homo sapiens]	YHNVGLSKCEIK	YHNVGLSKC[+418.1]EIK	YHNVGLSKC#EIK	603.62	3	C233	51.56	600246432	-0.0681243	BTD
NP_001193929.1|	HNRPDL	|HNRPDL|9987|O14979|heterogeneous nuclear ribonucleoprotein D-like isoform b [Homo sapiens]	YHQIGSGKCEIK	YHQIGSGKC[+418.1]EIK	YHQIGSGKC#EIK	594.276	3	C303	47.98	582232416	-0.0766568	BTD
NP_001193929.1|	HNRPDL	|HNRPDL|9987|O14979|heterogeneous nuclear ribonucleoprotein D-like isoform b [Homo sapiens]	YHQIGSGKCEIK	YHQIGSGKC[+418.1]EIK	YHQIGSGKC#EIK	445.959	4	C303	47.98	323117744	-0.19939	BTD
NP_112420.1|	HNRNPA1	|HNRNPA1|3178|P09651|heterogeneous nuclear ribonucleoprotein A1 isoform b [Homo sapiens]	YHTVNGHNCEVR	YHTVNGHNC[+418.1]EVR	YHTVNGHNC#EVR	616.263	3	C175	45.83	139139796	-0.286533	BTD
NP_009191.1|	LYPLA2	|LYPLA2|11313|O95372|acyl-protein thioesterase 2 [Homo sapiens]	YICPHAPR	YIC[+418.1]PHAPR	YIC#PHAPR	458.874	3	C56	54.76	904319040	0.0759035	BTD
NP_113584.3|	HUWE1	|HUWE1|10075|Q7Z6Z7|E3 ubiquitin-protein ligase HUWE1 [Homo sapiens]	YICQKPSIQK	YIC[+418.1]QKPSIQK	YIC#QKPSIQK	542.599	3	C699	51.39	239670656	-0.238915	BTD
NP_004850.1|	CLTC	|CLTC|1213|Q00610|clathrin heavy chain 1 [Homo sapiens]	YIQAACK	YIQAAC[+418.1]K	YIQAAC#K	405.516	3	C736	54.14	73536308	-0.317607	BTD
NP_055703.1|	FAM3C	|FAM3C|10447|Q92520|protein FAM3C precursor [Homo sapiens]	YKCGISK	YKC[+418.1]GISK	YKC#GISK	406.188	3	C58	48.92	208310352	-0.25377	BTD
NP_005266.2|	GNL1	|GNL1|2794|P36915;B4DYK6|guanine nucleotide-binding protein-like 1 [Homo sapiens]	YKDGVVTIGCVGFPNVGK	YKDGVVTIGC[+418.1]VGFPNVGK	YKDGVVTIGC#VGFPNVGK	757.703	3	C365	74.33	46273842	-0.33052	BTD
NP_001129166.1|	VDAC3	|VDAC3|7419|Q9Y277|voltage-dependent anion-selective channel protein 3 isoform 2 [Homo sapiens]	YKVCNYGLTFTQK	YKVC[+418.1]NYGLTFTQK	YKVC#NYGLTFTQK	991.961	2	C66	65.02	580866560	-0.0773038	BTD
NP_001129166.1|	VDAC3	|VDAC3|7419|Q9Y277|voltage-dependent anion-selective channel protein 3 isoform 2 [Homo sapiens]	YKVCNYGLTFTQK	YKVC[+418.1]NYGLTFTQK	YKVC#NYGLTFTQK	661.643	3	C66	65.02	1633890304	0.421474	BTD
NP_060590.1|	ARMC1	|ARMC1|55156|Q9NVT9|armadillo repeat-containing protein 1 [Homo sapiens]	YLAECR	YLAEC[+418.1]R	YLAEC#R	586.747	2	C69	57.35	175199720	-0.269453	BTD
NP_006817.1|	YWHAQ	|YWHAQ|10971|P27348|14-3-3 protein theta [Homo sapiens]	YLAEVACGDDRK	YLAEVAC[+418.1]GDDRK	YLAEVAC#GDDRK	879.385	2	C134	57.07	257823848	-0.230317	BTD
NP_006817.1|	YWHAQ	|YWHAQ|10971|P27348|14-3-3 protein theta [Homo sapiens]	YLAEVACGDDRK	YLAEVAC[+418.1]GDDRK	YLAEVAC#GDDRK	586.592	3	C134	57.07	1202966784	0.217362	BTD
NP_006793.1|	SF3A3	|SF3A3|10946|Q12874;B3KY12|splicing factor 3A subunit 3 [Homo sapiens]	YLDLHDCYLK	YLDLHDC[+418.1]YLK	YLDLHDC#YLK	567.586	3	C145	69.43	139779472	-0.28623	BTD
NP_005991.1|	TUBA4A	|TUBA4A|7277|P68366|tubulin alpha-4A chain [Homo sapiens]	YMACCLLYR	YM[+16]AC[+418.1]C[+57]LLYR	YMAC#CLLYR	813.832	2	C315	70.49	640644800	-0.0489891	BTD
NP_005991.1|	TUBA4A	|TUBA4A|7277|P68366|tubulin alpha-4A chain [Homo sapiens]	YMACCLLYR	YM[+16]AC[+418.1]C[+57]LLYR	YMAC#CLLYR	542.891	3	C315	70.49	149767648	-0.281499	BTD
NP_005991.1|	TUBA4A	|TUBA4A|7277|P68366|tubulin alpha-4A chain [Homo sapiens]	YMACCLLYR	YM[+16]AC[+57]C[+418.1]LLYR	YMACC#LLYR	813.832	2	C316	71.32	457658144	-0.135663	BTD
NP_006420.1|	CCT7	|CCT7|10574|Q99832|T-complex protein 1 subunit eta isoform a [Homo sapiens]	YNFFTGCPK	YNFFTGC[+418.1]PK	YNFFTGC#PK	498.878	3	C364	74.36	64884792	-0.321705	BTD
NP_004374.1|	CSK	|CSK|1445|P41240;B2R6Q4|tyrosine-protein kinase CSK [Homo sapiens]	YNFHGTAEQDLPFCK	YNFHGTAEQDLPFC[+418.1]K	YNFHGTAEQDLPFC#K	729.98	3	C31	71.78	156457636	-0.27833	BTD
NP_001032583.1|	DYNLL1	|DYNLL1|8655|P63167;Q6FGH9|dynein light chain 1, cytoplasmic [Homo sapiens]	YNPTWHCIVGR	YNPTWHC[+418.1]IVGR	YNPTWHC#IVGR	882.393	2	C56	68.93	204182256	-0.255725	BTD
NP_001032583.1|	DYNLL1	|DYNLL1|8655|P63167;Q6FGH9|dynein light chain 1, cytoplasmic [Homo sapiens]	YNPTWHCIVGR	YNPTWHC[+418.1]IVGR	YNPTWHC#IVGR	588.598	3	C56	68.93	1027216960	0.134116	BTD
NP_001230685.1|	PXN	|PXN|5829|P49023|paxillin isoform 3 [Homo sapiens]	YPHPCAAR	YPHPC[+418.1]AAR	YPHPC#AAR	444.859	3	C305	50.11	100634664	-0.304772	BTD
NP_886552.2|	TRNT1	|TRNT1|51095|Q96Q11|CCA tRNA nucleotidyltransferase 1, mitochondrial [Homo sapiens]	YQGEHCLLK	YQGEHC[+418.1]LLK	YQGEHC#LLK	754.837	2	C373	61.25	672464128	-0.0339175	BTD
NP_886552.2|	TRNT1	|TRNT1|51095|Q96Q11|CCA tRNA nucleotidyltransferase 1, mitochondrial [Homo sapiens]	YQGEHCLLK	YQGEHC[+418.1]LLK	YQGEHC#LLK	503.56	3	C373	61.25	739580896	-0.00212677	BTD
NP_001952.1|	EEF2	|EEF2|1938|P13639|elongation factor 2 [Homo sapiens]	YRCELLYEGPPDDEAAMGIK	YRC[+418.1]ELLYEGPPDDEAAM[+16]GIK	YRC#ELLYEGPPDDEAAMGIK	902.062	3	C369	69.91	458577872	-0.135227	BTD
NP_005424.1|	YES1	|YES1|7525|P07947|tyrosine-protein kinase Yes [Homo sapiens]	YRPENTPEPVSTSVSHYGAEPTTVSPCPSSSAK	YRPENTPEPVSTSVSHYGAEPTTVSPC[+418.1]PSSSAK	YRPENTPEPVSTSVSHYGAEPTTVSPC#PSSSAK	970.941	4	C42	57.19	236914624	-0.240221	BTD
NP_005969.1|	S100A2	|S100A2|6273|P29034|protein S100-A2 [Homo sapiens]	YSCQEGDKFK	YSC[+418.1]QEGDKFK	YSC#QEGDKFK	811.834	2	C21	50.11	556504288	-0.0888433	BTD
NP_005969.1|	S100A2	|S100A2|6273|P29034|protein S100-A2 [Homo sapiens]	YSCQEGDKFK	YSC[+418.1]QEGDKFK	YSC#QEGDKFK	541.559	3	C21	50.11	2695310336	0.924229	BTD
NP_065393.1|	RTN4	|RTN4|57142|Q9NQC3;Q8IUA4|reticulon-4 isoform A [Homo sapiens]	YSNSALGHVNCTIK	YSNSALGHVNC[+418.1]TIK	YSNSALGHVNC#TIK	962.938	2	C1101	57.58	2105606656	0.644908	BTD
NP_065393.1|	RTN4	|RTN4|57142|Q9NQC3;Q8IUA4|reticulon-4 isoform A [Homo sapiens]	YSNSALGHVNCTIK	YSNSALGHVNC[+418.1]TIK	YSNSALGHVNC#TIK	642.294	3	C1101	57.58	11387499520	5.04139	BTD
NP_005712.1|	ACTR3	|ACTR3|10096|P61158|actin-related protein 3 [Homo sapiens]	YSYVCPDLVK	YSYVC[+418.1]PDLVK	YSYVC#PDLVK	802.86	2	C235	72.52	306836320	-0.207102	BTD
NP_005712.1|	ACTR3	|ACTR3|10096|P61158|actin-related protein 3 [Homo sapiens]	YSYVCPDLVK	YSYVC[+418.1]PDLVK	YSYVC#PDLVK	535.576	3	C235	72.52	98069100	-0.305987	BTD
NP_002107.3|	HLA-A	|HLA-A|3105|P04439;B1PKY1;B2R7U3|HLA class I histocompatibility antigen, A-1 alpha chain precursor [Homo sapiens]	YTCHVQHEGLPK	YTC[+418.1]HVQHEGLPK	YTC#HVQHEGLPK	610.608	3	C283	49.94	375632704	-0.174515	BTD
NP_001012321.1|	RPSA	|RPSA|3921|P08865|40S ribosomal protein SA [Homo sapiens]	YVDIAIPCNNK	YVDIAIPC[+418.1]NNK	YVDIAIPC#NNK	834.381	2	C163	71.97	317781952	-0.201917	BTD
NP_001447.2|	FLNA	|FLNA|2316|P21333;Q60FE5;Q6NXF2|filamin-A isoform 1 [Homo sapiens]	YVICVR	YVIC[+418.1]VR	YVIC#VR	585.775	2	C1715	67	445833344	-0.141264	BTD
NP_006089.1|	GNB2L1	|GNB2L1|10399|P63244;E9KL35|guanine nucleotide-binding protein subunit beta-2-like 1 [Homo sapiens]	YWLCAATGPSIK	YWLC[+418.1]AATGPSIK	YWLC#AATGPSIK	864.4	2	C249	77.92	63008431	-0.322594	BTD
NP_775083.1|	CAST	|CAST|831|G5E946;Q86YM9|calpastatin isoform b [Homo sapiens]	AAAPAPVSEAVCR	AAAPAPVSEAVC[+333.2]R	AAAPAPVSEAVC#R	787.903	2	C386	52.8	361495360	-0.307267	DYn2
NP_775083.1|	CAST	|CAST|831|G5E946;Q86YM9|calpastatin isoform b [Homo sapiens]	AAAPAPVSEAVCR	AAAPAPVSEAVC[+333.2]R	AAAPAPVSEAVC#R	525.605	3	C386	52.8	229705760	-0.406509	DYn2
NP_002147.2|	HSPD1	|HSPD1|3329|P10809|60 kDa heat shock protein, mitochondrial [Homo sapiens]	AAVEEGIVLGGGCALLR	AAVEEGIVLGGGC[+333.2]ALLR	AAVEEGIVLGGGC#ALLR	981.03	2	C442	77.45	119411452	-0.489564	DYn2
NP_002147.2|	HSPD1	|HSPD1|3329|P10809|60 kDa heat shock protein, mitochondrial [Homo sapiens]	AAVEEGIVLGGGCALLR	AAVEEGIVLGGGC[+333.2]ALLR	AAVEEGIVLGGGC#ALLR	654.356	3	C442	77.45	546856832	-0.167684	DYn2
NP_001967.3|	ENO3	|ENO3|2027|P13929;D3DTL2|beta-enolase isoform 1 [Homo sapiens]	ACNCLLLK	AC[+333.2]NC[+57]LLLK	AC#NCLLLK	634.331	2	C337	62.45	979199584	0.157884	DYn2
NP_000261.2|	PNP	|PNP|4860|P00491|purine nucleoside phosphorylase [Homo sapiens]	ACVMMQGR	AC[+333.2]VM[+16]MQGR	AC#VMMQGR	622.783	2	C78	46.34	845708992	1.70199	DYn2
NP_000261.2|	PNP	|PNP|4860|P00491|purine nucleoside phosphorylase [Homo sapiens]	ACVMMQGR	AC[+333.2]VM[+16]M[+16]QGR	AC#VMMQGR	630.78	2	C78	39.8	3029713536	0.724001	DYn2
NP_000261.2|	PNP	|PNP|4860|P00491|purine nucleoside phosphorylase [Homo sapiens]	ACVMMQGR	AC[+333.2]VMM[+16]QGR	AC#VMMQGR	622.783	2	C78	52.19	1730983424	0.0573614	DYn2
NP_689476.2|	TPM3	|TPM3|7170|P06753;Q8NAH0|tropomyosin alpha-3 chain isoform 1 [Homo sapiens]	AELAESKCSELEEELKNVTNNLK	AELAESKC[+333.2]SELEEELKNVTNNLK	AELAESKC#SELEEELKNVTNNLK	731.869	4	C191	75.34	497832768	-0.2046	DYn2
NP_001447.2|	FLNA	|FLNA|2316|P21333;Q60FE5;Q6NXF2|filamin-A isoform 1 [Homo sapiens]	AHVVPCFDASK	AHVVPC[+333.2]FDASK	AHVVPC#FDASK	753.874	2	C1157	54.72	1350692064	0.43763	DYn2
NP_001447.2|	FLNA	|FLNA|2316|P21333;Q60FE5;Q6NXF2|filamin-A isoform 1 [Homo sapiens]	AHVVPCFDASK	AHVVPC[+333.2]FDASK	AHVVPC#FDASK	502.919	3	C1157	54.72	1979753856	0.911333	DYn2
NP_001407.1|	EIF4A1	|EIF4A1|1973|P60842|eukaryotic initiation factor 4A-I isoform 1 [Homo sapiens]	AILPCIK	AILPC[+333.2]IK	AILPC#IK	545.82	2	C66	68.54	2350502144	1.19052	DYn2
NP_031381.2|	HSP90AB1	|HSP90AB1|3326|P08238|heat shock protein HSP 90-beta [Homo sapiens]	AKFENLCK	AKFENLC[+333.2]K	AKFENLC#K	643.334	2	C564	48.39	383055576	-0.291031	DYn2
NP_031381.2|	HSP90AB1	|HSP90AB1|3326|P08238|heat shock protein HSP 90-beta [Homo sapiens]	AKFENLCK	AKFENLC[+333.2]K	AKFENLC#K	429.225	3	C564	48.39	372960080	-0.298634	DYn2
NP_001230106.1|	ALDOA	|ALDOA|226|P04075|fructose-bisphosphate aldolase A isoform 2 [Homo sapiens]	ALANSLACQGK	ALANSLAC[+333.2]QGK	ALANSLAC#QGK	704.866	2	C393	50.78	2822519040	1.54596	DYn2
NP_001230106.1|	ALDOA	|ALDOA|226|P04075|fructose-bisphosphate aldolase A isoform 2 [Homo sapiens]	ALANSLACQGK	ALANSLAC[+333.2]QGK	ALANSLAC#QGK	470.247	3	C393	50.78	979577120	0.158168	DYn2
NP_060439.2|	IWS1	|IWS1|55677|Q96ST2|protein IWS1 homolog [Homo sapiens]	ALRPGDPGFCAR	ALRPGDPGFC[+333.2]AR	ALRPGDPGFC#AR	531.605	3	C749	50.76	737799360	-0.023898	DYn2
NP_003964.3|	RPL14	|RPL14|9045|P50914|60S ribosomal protein L14 [Homo sapiens]	ALVDGPCTQVR	ALVDGPC[+333.2]TQVR	ALVDGPC#TQVR	746.385	2	C42	55.4	357255776	-0.310459	DYn2
NP_115571.1|	SON	|SON|6651|P18583|protein SON isoform B [Homo sapiens]	ANAAAMCAK	ANAAAM[+16]C[+333.2]AK	ANAAAMC#AK	600.281	2	C2070	36.98	710064128	-0.0447835	DYn2
NP_004492.2|	HNRNPU	|HNRNPU|3192|Q00839|heterogeneous nuclear ribonucleoprotein U isoform b [Homo sapiens]	APQCLGK	APQC[+333.2]LGK	APQC#LGK	525.276	2	C543	45.92	3837538048	2.3103	DYn2
NP_001447.2|	FLNA	|FLNA|2316|P21333;Q60FE5;Q6NXF2|filamin-A isoform 1 [Homo sapiens]	ATCAPQHGAPGPGPADASK	ATC[+333.2]APQHGAPGPGPADASK	ATC#APQHGAPGPGPADASK	1033.49	2	C2535	38.71	81501042	-0.518111	DYn2
NP_001447.2|	FLNA	|FLNA|2316|P21333;Q60FE5;Q6NXF2|filamin-A isoform 1 [Homo sapiens]	ATCAPQHGAPGPGPADASK	ATC[+333.2]APQHGAPGPGPADASK	ATC#APQHGAPGPGPADASK	689.33	3	C2535	38.71	1416040192	0.486839	DYn2
NP_003592.3|	SMARCA5	|SMARCA5|8467|O60264|SWI/SNF-related matrix-associated actin-dependent regulator of chromatin subfamily A member 5 [Homo sapiens]	ATNVCTR	ATNVC[+333.2]TR	ATNVC#TR	549.274	2	C165	39.39	344047760	-0.320405	DYn2
NP_060708.1|	AGK	|AGK|55750|Q53H12;A4D1U5|acylglycerol kinase, mitochondrial precursor [Homo sapiens]	ATVFLNPAACK	ATVFLNPAAC[+333.2]K	ATVFLNPAAC#K	734.387	2	C72	61.96	117226086	-0.491209	DYn2
NP_001019.1|	RPS25	|RPS25|6230|P62851|40S ribosomal protein S25 [Homo sapiens]	ATYDKLCK	ATYDKLC[+333.2]K	ATYDKLC#K	637.826	2	C59	45.51	784398992	0.011193	DYn2
NP_001019.1|	RPS25	|RPS25|6230|P62851|40S ribosomal protein S25 [Homo sapiens]	ATYDKLCK	ATYDKLC[+333.2]K	ATYDKLC#K	425.553	3	C59	45.51	707878896	-0.046429	DYn2
NP_055874.2|	TLN2	|TLN2|83660|Q9Y4G6|talin-2 [Homo sapiens]	AVAAGNSCR	AVAAGNSC[+333.2]R	AVAAGNSC#R	591.29	2	C2197	37.67	92166354	-0.51008	DYn2
NP_003277.1|	TOP1	|TOP1|7150|P11387|DNA topoisomerase 1 [Homo sapiens]	AVAILCNHQR	AVAILC[+333.2]NHQR	AVAILC#NHQR	486.594	3	C630	49.27	252397712	-0.389421	DYn2
NP_005991.1|	TUBA4A	|TUBA4A|7277|P68366|tubulin alpha-4A chain [Homo sapiens]	AVCMLSNTTAIAEAWAR	AVC[+333.2]M[+16]LSNTTAIAEAWAR	AVC#MLSNTTAIAEAWAR	719.687	3	C376	85.83	51689598	-0.54056	DYn2
NP_008839.2|	RAC1	|RAC1|5879|P63000;A4D2P1|ras-related C3 botulinum toxin substrate 1 isoform Rac1 [Homo sapiens]	AVLCPPPVK	AVLC[+333.2]PPPVK	AVLC#PPPVK	628.857	2	C178	57.24	2460094144	1.27304	DYn2
NP_008839.2|	RAC1	|RAC1|5879|P63000;A4D2P1|ras-related C3 botulinum toxin substrate 1 isoform Rac1 [Homo sapiens]	AVLCPPPVK	AVLC[+333.2]PPPVK	AVLC#PPPVK	419.574	3	C178	57.24	301336248	-0.352569	DYn2
NP_008839.2|	RAC1	|RAC1|5879|P63000;A4D2P1|ras-related C3 botulinum toxin substrate 1 isoform Rac1 [Homo sapiens]	AVLCPPPVKK	AVLC[+333.2]PPPVKK	AVLC#PPPVKK	462.272	3	C178	49.88	357383920	-0.310363	DYn2
NP_005498.1|	CFL1	|CFL1|1072|P23528|cofilin-1 [Homo sapiens]	AVLFCLSEDKK	AVLFC[+333.2]LSEDKK	AVLFC#LSEDKK	793.418	2	C39	63.41	536504992	-0.175479	DYn2
NP_005498.1|	CFL1	|CFL1|1072|P23528|cofilin-1 [Homo sapiens]	AVLFCLSEDKK	AVLFC[+333.2]LSEDKK	AVLFC#LSEDKK	529.281	3	C39	63.41	1103684672	0.251625	DYn2
NP_004492.2|	HNRNPU	|HNRNPU|3192|Q00839|heterogeneous nuclear ribonucleoprotein U isoform b [Homo sapiens]	AVVVCPK	AVVVC[+333.2]PK	AVVVC#PK	524.797	2	C588	50.38	672083840	-0.0733839	DYn2
NP_000986.2|	RPL34	|RPL34|6164|P49207|60S ribosomal protein L34 [Homo sapiens]	AYGGSMCAK	AYGGSMC[+333.2]AK	AYGGSMC#AK	610.776	2	C83	39.45	361581072	-0.0442814	DYn2
NP_000986.2|	RPL34	|RPL34|6164|P49207|60S ribosomal protein L34 [Homo sapiens]	AYGGSMCAK	AYGGSM[+16]C[+333.2]AK	AYGGSMC#AK	618.773	2	C83	38.8	710730848	-0.307202	DYn2
NP_005991.1|	TUBA4A	|TUBA4A|7277|P68366|tubulin alpha-4A chain [Homo sapiens]	AYHEQLSVAEITNACFEPANQMVK	AYHEQLSVAEITNAC[+333.2]FEPANQMVK	AYHEQLSVAEITNAC#FEPANQMVK	757.365	4	C295	73.24	322748512	-0.251258	DYn2
NP_005991.1|	TUBA4A	|TUBA4A|7277|P68366|tubulin alpha-4A chain [Homo sapiens]	AYHEQLSVAEITNACFEPANQMVK	AYHEQLSVAEITNAC[+333.2]FEPANQM[+16]VK	AYHEQLSVAEITNAC#FEPANQMVK	1014.82	3	C295	69.39	435873536	-0.336444	DYn2
NP_116093.1|	TUBA1C	|TUBA1C|84790|Q9BQE3|tubulin alpha-1C chain [Homo sapiens]	AYHEQLTVAEITNACFEPANQMVK	AYHEQLTVAEITNAC[+333.2]FEPANQM[+16]VK	AYHEQLTVAEITNAC#FEPANQMVK	1019.49	3	C295	65.92	824025216	0.0410328	DYn2
NP_116093.1|	TUBA1C	|TUBA1C|84790|Q9BQE3|tubulin alpha-1C chain [Homo sapiens]	AYHEQLTVAEITNACFEPANQMVK	AYHEQLTVAEITNAC[+333.2]FEPANQM[+16]VK	AYHEQLTVAEITNAC#FEPANQMVK	764.868	4	C295	65.92	269044608	-0.376885	DYn2
NP_000971.1|	RPL18A	|RPL18A|6142|Q02543|60S ribosomal protein L18a [Homo sapiens]	CHTPPLYR	C[+333.2]HTPPLYR	C#HTPPLYR	660.332	2	C22	47.96	296571580	-0.356156	DYn2
NP_031381.2|	HSP90AB1	|HSP90AB1|3326|P08238|heat shock protein HSP 90-beta [Homo sapiens]	CLELFSELAEDKENYK	C[+333.2]LELFSELAEDKENYK	C#LELFSELAEDKENYK	755.365	3	C412	80.04	196813136	-0.431278	DYn2
NP_001006.1|	RPS11	|RPS11|6205|P62280|40S ribosomal protein S11 [Homo sapiens]	CPFTGNVSIR	C[+333.2]PFTGNVSIR	C#PFTGNVSIR	713.861	2	C60	62.94	140595368	-0.473612	DYn2
NP_001129064.1|	RPS27A	|RPS27A|6233|P62979;B2RDW1|ubiquitin-40S ribosomal protein S27a precursor [Homo sapiens]	CCLTYCFNKPEDK	C[+57]C[+333.2]LTYC[+57]FNKPEDK	CC#LTYCFNKPEDK	670.963	3	C145	67.56	123301776	-0.486634	DYn2
NP_001129064.1|	RPS27A	|RPS27A|6233|P62979;B2RDW1|ubiquitin-40S ribosomal protein S27a precursor [Homo sapiens]	CCLTYCFNKPEDK	C[+57]C[+57]LTYC[+333.2]FNKPEDK	CCLTYC#FNKPEDK	670.963	3	C149	55.57	287380096	-0.363078	DYn2
NP_001393.1|	EEF1A1	|EEF1A1|1915|P68104;Q6IPS9|elongation factor 1-alpha 1 [Homo sapiens]	DGNASGTTLLEALDCILPPTRPTDKPLR	DGNASGTTLLEALDC[+333.2]ILPPTRPTDKPLR	DGNASGTTLLEALDC#ILPPTRPTDKPLR	1099.91	3	C234	85.96	304203456	-0.350409	DYn2
NP_001393.1|	EEF1A1	|EEF1A1|1915|P68104;Q6IPS9|elongation factor 1-alpha 1 [Homo sapiens]	DGNASGTTLLEALDCILPPTRPTDKPLR	DGNASGTTLLEALDC[+333.2]ILPPTRPTDKPLR	DGNASGTTLLEALDC#ILPPTRPTDKPLR	825.184	4	C234	85.96	1569245312	0.602207	DYn2
NP_000997.1|	RPS3A	|RPS3A|6189|P61247|40S ribosomal protein S3a isoform 1 [Homo sapiens]	DKMCSMVK	DKM[+16]C[+333.2]SM[+16]VK	DKMC#SMVK	653.796	2	C111	32.01	448285696	-0.241911	DYn2
NP_000997.1|	RPS3A	|RPS3A|6189|P61247|40S ribosomal protein S3a isoform 1 [Homo sapiens]	DKMCSMVK	DKMC[+333.2]SM[+16]VK	DKMC#SMVK	645.798	2	C111	40.21	213809040	-0.418479	DYn2
NP_001007.2|	RPS12	|RPS12|6206|P25398|40S ribosomal protein S12 [Homo sapiens]	DVIEEYFKCK	DVIEEYFKC[+333.2]K	DVIEEYFKC#K	803.895	2	C130	66.63	429537152	-0.256029	DYn2
NP_005372.2|	NCL	|NCL|4691|P19338;B3KM80|nucleolin [Homo sapiens]	EALNSCNKR	EALNSC[+333.2]NKR	EALNSC#NKR	684.34	2	C543	35.98	1038733376	0.202715	DYn2
NP_005372.2|	NCL	|NCL|4691|P19338;B3KM80|nucleolin [Homo sapiens]	EALNSCNKR	EALNSC[+333.2]NKR	EALNSC#NKR	456.563	3	C543	35.98	1975104256	0.907832	DYn2
NP_056315.1|	C2CD2	|C2CD2|25966|Q9Y426|C2 domain-containing protein 2 isoform 1 precursor [Homo sapiens]	EAQNLQCAASTAQESCPPKPPR	EAQNLQC[+333.2]AASTAQESC[+57]PPKPPR	EAQNLQC#AASTAQESCPPKPPR	906.099	3	C244	46.53	418547600	-0.264305	DYn2
NP_705935.1|	TPM3	|TPM3|7170|P06753|tropomyosin alpha-3 chain isoform 2 [Homo sapiens]	EEHLCTQR	EEHLC[+333.2]TQR	EEHLC#TQR	674.819	2	C233	40.74	258914328	-0.384514	DYn2
NP_821133.1|	TUBB	|TUBB|203068|P07437;Q5SU16|tubulin beta chain [Homo sapiens]	EIVHIQAGQCGNQIGAK	EIVHIQAGQC[+333.2]GNQIGAK	EIVHIQAGQC#GNQIGAK	700.362	3	C12	51.49	1970862464	0.904638	DYn2
NP_006078.2|	TUBB4A	|TUBB4A|10382|P04350|tubulin beta-4A chain [Homo sapiens]	EIVHLQAGQCGNQIGAK	EIVHLQAGQC[+333.2]GNQIGAK	EIVHLQAGQC#GNQIGAK	1050.04	2	C12	51.49	273350936	-0.373642	DYn2
NP_006078.2|	TUBB4A	|TUBB4A|10382|P04350|tubulin beta-4A chain [Homo sapiens]	EIVHLQAGQCGNQIGAK	EIVHLQAGQC[+333.2]GNQIGAK	EIVHLQAGQC#GNQIGAK	700.362	3	C12	51.49	1951506432	0.890062	DYn2
NP_005889.3|	CAPRIN1	|CAPRIN1|4076|Q14444|caprin-1 isoform 1 [Homo sapiens]	EKPVCGTTYK	EKPVC[+333.2]GTTYK	EKPVC#GTTYK	729.869	2	C226	40.8	404872176	-0.274603	DYn2
NP_005889.3|	CAPRIN1	|CAPRIN1|4076|Q14444|caprin-1 isoform 1 [Homo sapiens]	EKPVCGTTYK	EKPVC[+333.2]GTTYK	EKPVC#GTTYK	486.915	3	C226	40.8	553764064	-0.162482	DYn2
NP_036256.2|	CHORDC1	|CHORDC1|26973|Q9UHD1|cysteine and histidine-rich domain-containing protein 1 isoform a [Homo sapiens]	ELCELKPK	ELC[+333.2]ELKPK	ELC#ELKPK	431.569	3	C86	50.1	1019974336	0.188589	DYn2
NP_004578.2|	RRBP1	|RRBP1|6238|Q9P2E9|ribosome-binding protein 1 [Homo sapiens]	ELCHTQSSHASLR	ELC[+333.2]HTQSSHASLR	ELC#HTQSSHASLR	601.293	3	C459	39.6	188563780	-0.43749	DYn2
NP_006588.1|	HSPA8	|HSPA8|3312|P11142;Q53HF2|heat shock cognate 71 kDa protein isoform 1 [Homo sapiens]	ELEKVCNPIITK	ELEKVC[+333.2]NPIITK	ELEKVC#NPIITK	860.471	2	C603	55.02	153908928	-0.463586	DYn2
NP_006588.1|	HSPA8	|HSPA8|3312|P11142;Q53HF2|heat shock cognate 71 kDa protein isoform 1 [Homo sapiens]	ELEKVCNPIITK	ELEKVC[+333.2]NPIITK	ELEKVC#NPIITK	573.983	3	C603	55.02	686603488	-0.0624501	DYn2
NP_005264.2|	GNB2	|GNB2|2783|P62879;Q6FHM2|guanine nucleotide-binding protein G(I)/G(S)/G(T) subunit beta-2 [Homo sapiens]	ELPGHTGYLSCCR	ELPGHTGYLSC[+333.2]C[+57]R	ELPGHTGYLSC#CR	609.284	3	C148	51.56	65716680	-0.529998	DYn2
NP_003409.1|	CNBP	|CNBP|7555|P62633|cellular nucleic acid-binding protein isoform 3 [Homo sapiens]	EQCCYNCGKPGHLAR	EQC[+57]C[+333.2]YNC[+57]GKPGHLAR	EQCC#YNCGKPGHLAR	532.24	4	C98	39.46	380340384	-0.293076	DYn2
NP_002818.1|	PTPN1	|PTPN1|5770|P18031;A8K3M3|tyrosine-protein phosphatase non-receptor type 1 [Homo sapiens]	ESGSLSPEHGPVVVHCSAGIGR	ESGSLSPEHGPVVVHC[+333.2]SAGIGR	ESGSLSPEHGPVVVHC#SAGIGR	627.813	4	C215	51.28	318868576	-0.339366	DYn2
NP_004485.1|	HDGF	|HDGF|3068|P51858|hepatoma-derived growth factor isoform a [Homo sapiens]	EYKCGDLVFAK	EYKC[+333.2]GDLVFAK	EYKC#GDLVFAK	803.403	2	C12	58.35	96279049	-0.506983	DYn2
NP_004485.1|	HDGF	|HDGF|3068|P51858|hepatoma-derived growth factor isoform a [Homo sapiens]	EYKCGDLVFAK	EYKC[+333.2]GDLVFAK	EYKC#GDLVFAK	535.938	3	C12	58.35	164131744	-0.455888	DYn2
NP_031389.3|	NONO	|NONO|4841|Q15233|non-POU domain-containing octamer-binding protein isoform 1 [Homo sapiens]	FACHSASLTVR	FAC[+333.2]HSASLTVR	FAC#HSASLTVR	762.885	2	C145	50.04	235769824	-0.401942	DYn2
NP_031389.3|	NONO	|NONO|4841|Q15233|non-POU domain-containing octamer-binding protein isoform 1 [Homo sapiens]	FACHSASLTVR	FAC[+333.2]HSASLTVR	FAC#HSASLTVR	508.926	3	C145	50.04	692875600	-0.057727	DYn2
NP_031381.2|	HSP90AB1	|HSP90AB1|3326|P08238|heat shock protein HSP 90-beta [Homo sapiens]	FENLCK	FENLC[+333.2]K	FENLC#K	543.768	2	C564	53.23	345012488	-0.319679	DYn2
NP_942127.1|	ACLY	|ACLY|47|P53396|ATP-citrate synthase isoform 2 [Homo sapiens]	FICTTSAIQNR	FIC[+333.2]TTSAIQNR	FIC#TTSAIQNR	793.903	2	C20	56.86	574129600	-0.147147	DYn2
NP_000180.2|	HK2	|HK2|3099|P52789|hexokinase-2 [Homo sapiens]	FLSQIESDCLALLQVR	FLSQIESDC[+333.2]LALLQVR	FLSQIESDC#LALLQVR	723.386	3	C794	87.98	87586396	-0.513529	DYn2
NP_002296.1|	LGALS1	|LGALS1|3956|P09382|galectin-1 [Homo sapiens]	FNAHGDANTIVCNSK	FNAHGDANTIVC[+333.2]NSK	FNAHGDANTIVC#NSK	962.455	2	C61	46.37	458840688	-0.233963	DYn2
NP_002296.1|	LGALS1	|LGALS1|3956|P09382|galectin-1 [Homo sapiens]	FNAHGDANTIVCNSK	FNAHGDANTIVC[+333.2]NSK	FNAHGDANTIVC#NSK	641.972	3	C61	46.37	1853428480	0.816206	DYn2
NP_001247435.1|	RPS3	|RPS3|6188|-|40S ribosomal protein S3 isoform 2 [Homo sapiens]	GCEVVVSGK	GC[+333.2]EVVVSGK	GC#EVVVSGK	605.81	2	C150	50.61	473195952	-0.223153	DYn2
NP_002645.3|	PKM	|PKM|5315|P14618|pyruvate kinase isozymes M1/M2 isoform a [Homo sapiens]	GIFPVLCK	GIFPVLC[+333.2]K	GIFPVLC#K	605.339	2	C474	74.81	96692820	-0.506672	DYn2
NP_055140.1|	CORO1C	|CORO1C|23603|Q9ULV4|coronin-1C isoform 1 [Homo sapiens]	GLDVNKCEIAR	GLDVNKC[+333.2]EIAR	GLDVNKC#EIAR	775.903	2	C330	50.98	267997304	-0.377674	DYn2
NP_055140.1|	CORO1C	|CORO1C|23603|Q9ULV4|coronin-1C isoform 1 [Homo sapiens]	GLDVNKCEIAR	GLDVNKC[+333.2]EIAR	GLDVNKC#EIAR	517.605	3	C330	50.98	704178592	-0.0492155	DYn2
NP_009193.2|	PARK7	|PARK7|11315|Q99497|protein DJ-1 [Homo sapiens]	GLIAAICAGPTALLAHEIGFGSK	GLIAAIC[+333.2]AGPTALLAHEIGFGSK	GLIAAIC#AGPTALLAHEIGFGSK	848.461	3	C106	90.8	44657724	-0.545856	DYn2
NP_003482.1|	NAA10	|NAA10|8260|P41227|N-alpha-acetyltransferase 10 isoform 1 [Homo sapiens]	GNSPPSSGEACR	GNSPPSSGEAC[+333.2]R	GNSPPSSGEAC#R	747.836	2	C194	38.68	144650424	-0.470558	DYn2
NP_068814.2|	HSPA2	|HSPA2|3306|P54652|heat shock-related 70 kDa protein 2 [Homo sapiens]	GPAIGIDLGTTYSCVGVFQHGK	GPAIGIDLGTTYSC[+333.2]VGVFQHGK	GPAIGIDLGTTYSC#VGVFQHGK	851.765	3	C18	70.21	122810124	-0.487004	DYn2
NP_003741.1|	EIF3A	|EIF3A|8661|Q14152|eukaryotic translation initiation factor 3 subunit A [Homo sapiens]	HCDLQVR	HC[+333.2]DLQVR	HC#DLQVR	602.301	2	C478	47.46	261018612	-0.382929	DYn2
NP_003741.1|	EIF3A	|EIF3A|8661|Q14152|eukaryotic translation initiation factor 3 subunit A [Homo sapiens]	HCDLQVR	HC[+333.2]DLQVR	HC#DLQVR	401.869	3	C478	47.46	167846177	-0.453091	DYn2
NP_002939.2|	RPL15	|RPL15|6138|P61313|60S ribosomal protein L15 isoform 1 [Homo sapiens]	HCGALR	HC[+333.2]GALR	HC#GALR	495.253	2	C110	39.11	2165088128	1.0509	DYn2
NP_004588.1|	SNRPD2	|SNRPD2|6633|P62316|small nuclear ribonucleoprotein Sm D2 isoform 1 [Homo sapiens]	HCNMVLENVK	HC[+333.2]NMVLENVK	HC#NMVLENVK	760.373	2	C63	52.71	492166230	1.11886	DYn2
NP_004588.1|	SNRPD2	|SNRPD2|6633|P62316|small nuclear ribonucleoprotein Sm D2 isoform 1 [Homo sapiens]	HCNMVLENVK	HC[+333.2]NMVLENVK	HC#NMVLENVK	507.251	3	C63	52.71	464758140	-0.208868	DYn2
NP_004588.1|	SNRPD2	|SNRPD2|6633|P62316|small nuclear ribonucleoprotein Sm D2 isoform 1 [Homo sapiens]	HCNMVLENVK	HC[+333.2]NM[+16]VLENVK	HC#NMVLENVK	768.371	2	C63	45.62	2255339328	1.06298	DYn2
NP_004588.1|	SNRPD2	|SNRPD2|6633|P62316|small nuclear ribonucleoprotein Sm D2 isoform 1 [Homo sapiens]	HCNMVLENVK	HC[+333.2]NM[+16]VLENVK	HC#NMVLENVK	512.583	3	C63	45.62	2181142080	-0.229507	DYn2
NP_005498.1|	CFL1	|CFL1|1072|P23528|cofilin-1 [Homo sapiens]	HELQANCYEEVKDR	HELQANC[+333.2]YEEVKDR	HELQANC#YEEVKDR	689.658	3	C139	44.57	511070600	-0.194632	DYn2
NP_005498.1|	CFL1	|CFL1|1072|P23528|cofilin-1 [Homo sapiens]	HELQANCYEEVKDRCTLAEK	HELQANC[+57]YEEVKDRC[+333.2]TLAEK	HELQANCYEEVKDRC#TLAEK	923.771	3	C147	47.67	3248536320	1.86677	DYn2
NP_005498.1|	CFL1	|CFL1|1072|P23528|cofilin-1 [Homo sapiens]	HELQANCYEEVKDRCTLAEK	HELQANC[+57]YEEVKDRC[+333.2]TLAEK	HELQANCYEEVKDRC#TLAEK	693.08	4	C147	47.67	17203167744	12.375	DYn2
NP_859048.1|	PRDX1	|PRDX1|5052|Q06830|peroxiredoxin-1 [Homo sapiens]	HGEVCPAGWKPGSDTIKPDVQK	HGEVC[+333.2]PAGWKPGSDTIKPDVQK	HGEVC#PAGWKPGSDTIKPDVQK	671.339	4	C173	49.8	481439712	-0.216945	DYn2
NP_006363.4|	SYNCRIP	|SYNCRIP|10492|O60506|heterogeneous nuclear ribonucleoprotein Q isoform 1 [Homo sapiens]	HIGVCISVANNR	HIGVC[+333.2]ISVANNR	HIGVC#ISVANNR	808.422	2	C237	55.49	76411953	-0.521944	DYn2
NP_001164014.1|	PGAM5	|PGAM5|192111|Q96HS1;A9LN06|serine/threonine-protein phosphatase PGAM5, mitochondrial isoform 1 [Homo sapiens]	HLPGVCK	HLPGVC[+333.2]K	HLPGVC#K	362.864	3	C168	46.17	177181624	-0.446061	DYn2
NP_002650.1|	PLAUR	|PLAUR|5329|Q03405|urokinase plasminogen activator surface receptor isoform 1 precursor [Homo sapiens]	HQSLQCR	HQSLQC[+333.2]R	HQSLQC#R	602.798	2	C137	37.32	103900888	-0.501244	DYn2
NP_001020419.1|	DUT	|DUT|1854|P33316|deoxyuridine 5'-triphosphate nucleotidohydrolase, mitochondrial isoform 1 precursor [Homo sapiens]	IAQLICER	IAQLIC[+333.2]ER	IAQLIC#ER	639.847	2	C222	57.44	230053696	-0.406247	DYn2
NP_000356.1|	TPI1	|TPI1|7167|P60174;Q53HE2|triosephosphate isomerase isoform 1 [Homo sapiens]	IAVAAQNCYK	IAVAAQNC[+333.2]YK	IAVAAQNC#YK	707.363	2	C67	49.54	2762251136	1.50058	DYn2
NP_000356.1|	TPI1	|TPI1|7167|P60174;Q53HE2|triosephosphate isomerase isoform 1 [Homo sapiens]	IAVAAQNCYK	IAVAAQNC[+333.2]YK	IAVAAQNC#YK	471.911	3	C67	49.54	805087168	0.0267719	DYn2
NP_000966.2|	RPL11	|RPL11|6135|P62913;Q5VVD0|60S ribosomal protein L11 isoform 1 [Homo sapiens]	IAVHCTVR	IAVHC[+333.2]TVR	IAVHC#TVR	411.225	3	C72	46.05	189340264	-0.436905	DYn2
NP_659400.2|	FAM91A1	|FAM91A1|157769|Q658Y4|protein FAM91A1 [Homo sapiens]	ICTLPEKCAVDK	IC[+57]TLPEKC[+333.2]AVDK	ICTLPEKC#AVDK	570.625	3	C191	49.65	194482008	-0.433033	DYn2
NP_001279.2|	CLIC1	|CLIC1|1192|O00299;Q5SRT3|chloride intracellular channel protein 1 [Homo sapiens]	IGNCPFSQR	IGNC[+333.2]PFSQR	IGNC#PFSQR	677.832	2	C24	57.14	277820120	-0.370277	DYn2
NP_001157733.1|	PPIAL4D	|PPIAL4D|645142|F5H284|peptidylprolyl isomerase A (cyclophilin A)-like 4D [Homo sapiens]	IIPGFMCQGGDFTR	IIPGFM[+16]C[+333.2]QGGDFTR	IIPGFMC#QGGDFTR	945.947	2	C62	67.82	115503518	-0.492506	DYn2
NP_002037.2|	GAPDH	|GAPDH|2597|P04406|glyceraldehyde-3-phosphate dehydrogenase isoform 1 [Homo sapiens]	IISNASCTTNCLAPLAK	IISNASC[+333.2]TTNC[+57]LAPLAK	IISNASC#TTNCLAPLAK	1055.54	2	C152	60.87	2362497536	1.19955	DYn2
NP_002037.2|	GAPDH	|GAPDH|2597|P04406|glyceraldehyde-3-phosphate dehydrogenase isoform 1 [Homo sapiens]	IISNASCTTNCLAPLAK	IISNASC[+333.2]TTNC[+57]LAPLAK	IISNASC#TTNCLAPLAK	704.027	3	C152	60.87	3591723776	2.1252	DYn2
NP_002037.2|	GAPDH	|GAPDH|2597|P04406|glyceraldehyde-3-phosphate dehydrogenase isoform 1 [Homo sapiens]	IISNASCTTNCLAPLAK	IISNASC[+57]TTNC[+333.2]LAPLAK	IISNASCTTNC#LAPLAK	704.027	3	C156	64.4	414726144	-0.267182	DYn2
NP_001244955.1|	TPI1	|TPI1|7167|B7Z5D8|triosephosphate isomerase isoform 3 [Homo sapiens]	IIYGGSVTGATCK	IIYGGSVTGATC[+333.2]K	IIYGGSVTGATC#K	801.913	2	C136	53.77	337749392	-0.325148	DYn2
NP_001244955.1|	TPI1	|TPI1|7167|B7Z5D8|triosephosphate isomerase isoform 3 [Homo sapiens]	IIYGGSVTGATCK	IIYGGSVTGATC[+333.2]K	IIYGGSVTGATC#K	534.945	3	C136	53.77	257322756	-0.385712	DYn2
NP_003900.1|	CPNE3	|CPNE3|8895|O75131;Q05DL8|copine-3 [Homo sapiens]	IKNCLNPQFSK	IKNC[+333.2]LNPQFSK	IKNC#LNPQFSK	542.289	3	C54	51.61	1004878784	0.177221	DYn2
NP_000427.1|	OXCT1	|OXCT1|5019|P55809|succinyl-CoA:3-ketoacid coenzyme A transferase 1, mitochondrial precursor [Homo sapiens]	IMEKCTLPLTGK	IM[+16]EKC[+333.2]TLPLTGK	IMEKC#TLPLTGK	561.633	3	C456	53.97	41772016	-0.548029	DYn2
NP_001193496.1|	IFI16	|IFI16|3428|Q16666;B4DJT8;H3BLV7|gamma-interferon-inducible protein 16 isoform 1 [Homo sapiens]	INQLCSQTK	INQLC[+333.2]SQTK	INQLC#SQTK	684.353	2	C623	46.88	240584880	-0.398316	DYn2
NP_001095.1|	ACTN3	|ACTN3|89|Q08043;Q4VAM3|alpha-actinin-3 isoform 1 [Homo sapiens]	IQEKCQLEINFNTLQTK	IQEKC[+333.2]QLEINFNTLQTK	IQEKC#QLEINFNTLQTK	795.082	3	C346	66.05	535301024	-0.176386	DYn2
NP_004955.2|	HDAC1	|HDAC1|3065|Q13547;Q6IT96|histone deacetylase 1 [Homo sapiens]	ISICSSDKR	ISIC[+333.2]SSDKR	ISIC#SSDKR	671.345	2	C408	45.69	751076352	-0.0139	DYn2
NP_004955.2|	HDAC1	|HDAC1|3065|Q13547;Q6IT96|histone deacetylase 1 [Homo sapiens]	ISICSSDKR	ISIC[+333.2]SSDKR	ISIC#SSDKR	447.899	3	C408	45.69	1116902144	0.261578	DYn2
NP_000909.2|	P4HB	|P4HB|5034|P07237|protein disulfide-isomerase precursor [Homo sapiens]	ITEFCHR	ITEFC[+333.2]HR	ITEFC#HR	413.538	3	C343	46.86	380004624	-0.293329	DYn2
NP_006421.2|	CCT4	|CCT4|10575|P50991|T-complex protein 1 subunit delta isoform a [Homo sapiens]	ITGCASPGK	ITGC[+333.2]ASPGK	ITGC#ASPGK	583.797	2	C379	41.75	70249200	-0.526584	DYn2
NP_001000.2|	RPS5	|RPS5|6193|P46782|40S ribosomal protein S5 [Homo sapiens]	KAQCPIVER	KAQC[+333.2]PIVER	KAQC#PIVER	459.583	3	C66	49	583344144	-0.140208	DYn2
NP_005331.1|	HINT1	|HINT1|3094|P49773|histidine triad nucleotide-binding protein 1 [Homo sapiens]	KCAADLGLNK	KC[+333.2]AADLGLNK	KC#AADLGLNK	683.363	2	C84	49.56	204307624	-0.425634	DYn2
NP_004386.2|	DBN1	|DBN1|1627|Q16643|drebrin isoform a [Homo sapiens]	KCACASHVAK	KC[+333.2]AC[+57]ASHVAK	KC#ACASHVAK	704.347	2	C96	29.55	117597968	-0.490929	DYn2
NP_054862.1|	CD274	|CD274|29126|Q9NZQ7|programmed cell death 1 ligand 1 isoform a precursor [Homo sapiens]	KCGIQDTNSK	KC[+333.2]GIQDTNSK	KC#GIQDTNSK	713.853	2	C272	38.39	416913648	-0.265535	DYn2
NP_054862.1|	CD274	|CD274|29126|Q9NZQ7|programmed cell death 1 ligand 1 isoform a precursor [Homo sapiens]	KCGIQDTNSK	KC[+333.2]GIQDTNSK	KC#GIQDTNSK	476.238	3	C272	38.39	826831456	0.043146	DYn2
NP_002785.1|	PSMB2	|PSMB2|5690|P49721|proteasome subunit beta type-2 isoform 1 [Homo sapiens]	KCLEELQK	KC[+333.2]LEELQK	KC#LEELQK	441.904	3	C163	46.14	306407880	-0.348749	DYn2
NP_001896.2|	CTPS1	|CTPS1|1503|P17812|CTP synthase 1 [Homo sapiens]	KCLEEQGLK	KC[+333.2]LEEQGLK	KC#LEEQGLK	690.863	2	C491	42.58	1567553648	0.600933	DYn2
NP_001017963.2|	HSP90AA1	|HSP90AA1|3320|P07900;Q86SX1|heat shock protein HSP 90-alpha isoform 1 [Homo sapiens]	KCLELFTELAEDKENYK	KC[+333.2]LELFTELAEDKENYK	KC#LELFTELAEDKENYK	802.735	3	C542	66.11	320764144	-0.337939	DYn2
NP_006730.2|	MCM5	|MCM5|4174|P33992;B1AHB0|DNA replication licensing factor MCM5 [Homo sapiens]	KCNTDQAGRPK	KC[+333.2]NTDQAGRPK	KC#NTDQAGRPK	517.596	3	C197	28.09	715526912	-0.0406698	DYn2
NP_001015.1|	RPS21	|RPS21|6227|P63220;Q6FGH5|40S ribosomal protein S21 [Homo sapiens]	KCSASNR	KC[+333.2]SASNR	KC#SASNR	549.772	2	C17	28.54	2770550016	1.50683	DYn2
NP_001015.1|	RPS21	|RPS21|6227|P63220;Q6FGH5|40S ribosomal protein S21 [Homo sapiens]	KCSASNR	KC[+333.2]SASNR	KC#SASNR	366.85	3	C17	28.54	1966339072	0.901231	DYn2
NP_114127.3|	ATAD3B	|ATAD3B|83858|Q5T9A4|ATPase family AAA domain-containing protein 3B [Homo sapiens]	KCSEVAR	KC[+333.2]SEVAR	KC#SEVAR	375.862	3	C515	31.86	238929056	-0.399563	DYn2
NP_006861.1|	DSTN	|DSTN|11034|P60981|destrin isoform a [Homo sapiens]	KCSTPEEIK	KC[+333.2]STPEEIK	KC#STPEEIK	684.347	2	C23	40.47	313741904	-0.343227	DYn2
NP_005013.1|	PFN1	|PFN1|5216|P07737;Q53Y44|profilin-1 [Homo sapiens]	KCYEMASHLR	KC[+333.2]YEM[+16]ASHLR	KC#YEMASHLR	793.876	2	C128	39.06	94441464	-0.508367	DYn2
NP_005013.1|	PFN1	|PFN1|5216|P07737;Q53Y44|profilin-1 [Homo sapiens]	KCYEMASHLR	KC[+333.2]YEM[+16]ASHLR	KC#YEMASHLR	529.587	3	C128	39.06	1497543040	0.548213	DYn2
NP_005013.1|	PFN1	|PFN1|5216|P07737;Q53Y44|profilin-1 [Homo sapiens]	KCYEMASHLR	KC[+333.2]YEM[+16]ASHLR	KC#YEMASHLR	397.442	4	C128	39.06	542891280	-0.17067	DYn2
NP_004492.2|	HNRNPU	|HNRNPU|3192|Q00839|heterogeneous nuclear ribonucleoprotein U isoform b [Homo sapiens]	KDCEVVMMIGLPGAGK	KDC[+333.2]EVVM[+16]M[+16]IGLPGAGK	KDC#EVVMMIGLPGAGK	671.667	3	C478	66.33	595975904	-0.130696	DYn2
NP_001952.1|	EEF2	|EEF2|1938|P13639|elongation factor 2 [Homo sapiens]	KDEQERCITIK	KDEQERC[+333.2]ITIK	KDEQERC#ITIK	565.963	3	C67	44.97	3143749632	1.78786	DYn2
NP_001393.1|	EEF1A1	|EEF1A1|1915|P68104;Q6IPS9|elongation factor 1-alpha 1 [Homo sapiens]	KDGNASGTTLLEALDCILPPTRPTDK	KDGNASGTTLLEALDC[+333.2]ILPPTRPTDK	KDGNASGTTLLEALDC#ILPPTRPTDK	765.648	4	C234	82.06	334891840	-0.3273	DYn2
NP_001393.1|	EEF1A1	|EEF1A1|1915|P68104;Q6IPS9|elongation factor 1-alpha 1 [Homo sapiens]	KDGNASGTTLLEALDCILPPTRPTDKPLR	KDGNASGTTLLEALDC[+333.2]ILPPTRPTDKPLR	KDGNASGTTLLEALDC#ILPPTRPTDKPLR	857.208	4	C234	79.21	341688864	-0.322182	DYn2
NP_003282.2|	TPP2	|TPP2|7174|P29144|tripeptidyl-peptidase 2 [Homo sapiens]	KETGAASFLCR	KETGAASFLC[+333.2]R	KETGAASFLC#R	505.926	3	C28	55.36	156010224	-0.462004	DYn2
NP_003312.3|	TUFM	|TUFM|7284|P49411|elongation factor Tu, mitochondrial precursor [Homo sapiens]	KGDECELLGHSK	KGDEC[+333.2]ELLGHSK	KGDEC#ELLGHSK	550.271	3	C293	48.15	172652976	-0.449471	DYn2
NP_788955.1|	PSME1	|PSME1|5720|Q06323;A6NJG9;Q86SZ9|proteasome activator complex subunit 1 isoform 2 [Homo sapiens]	KGEDEDKGPPCGPVNCNEK	KGEDEDKGPPC[+333.2]GPVNC[+57]NEK	KGEDEDKGPPC#GPVNCNEK	802.695	3	C101	40.09	100931842	-0.503479	DYn2
NP_788955.1|	PSME1	|PSME1|5720|Q06323;A6NJG9;Q86SZ9|proteasome activator complex subunit 1 isoform 2 [Homo sapiens]	KKGEDEDKGPPCGPVNCNEK	KKGEDEDKGPPC[+333.2]GPVNC[+57]NEK	KKGEDEDKGPPC#GPVNCNEK	845.393	3	C101	36.88	87889048	-0.513301	DYn2
NP_002464.1|	MYH9	|MYH9|4627|P35579;Q60FE2|myosin-9 [Homo sapiens]	KLEEEQIILEDQNCK	KLEEEQIILEDQNC[+333.2]K	KLEEEQIILEDQNC#K	722.365	3	C988	55.63	559646240	-0.158053	DYn2
NP_005023.2|	PLS3	|PLS3|5358|P13797;A8K579|plastin-3 isoform 1 [Homo sapiens]	KLENCNYAVELGK	KLENC[+333.2]NYAVELGK	KLENC#NYAVELGK	907.461	2	C463	54.02	100646216	-0.503695	DYn2
NP_005023.2|	PLS3	|PLS3|5358|P13797;A8K579|plastin-3 isoform 1 [Homo sapiens]	KLENCNYAVELGK	KLENC[+333.2]NYAVELGK	KLENC#NYAVELGK	605.31	3	C463	54.02	228987944	-0.407049	DYn2
NP_006799.1|	SEC61B	|SEC61B|10952|P60468|protein transport protein Sec61 subunit beta [Homo sapiens]	KNASCGTR	KNASC[+333.2]GTR	KNASC#GTR	585.29	2	C39	28.35	664844960	-0.078835	DYn2
NP_060697.4|	UBA6	|UBA6|55236|A0AVT1|ubiquitin-like modifier-activating enzyme 6 [Homo sapiens]	KPNVGCQQDSEELLK	KPNVGC[+333.2]QQDSEELLK	KPNVGC#QQDSEELLK	1011	2	C347	49.51	85653708	-0.514984	DYn2
NP_060697.4|	UBA6	|UBA6|55236|A0AVT1|ubiquitin-like modifier-activating enzyme 6 [Homo sapiens]	KPNVGCQQDSEELLK	KPNVGC[+333.2]QQDSEELLK	KPNVGC#QQDSEELLK	674.338	3	C347	49.51	776712992	0.00540521	DYn2
NP_006635.2|	HSPH1	|HSPH1|10808|Q92598|heat shock protein 105 kDa [Homo sapiens]	KPVTDCVISVPSFFTDAER	KPVTDC[+333.2]VISVPSFFTDAER	KPVTDC#VISVPSFFTDAER	815.41	3	C140	83.9	37729238	-0.551073	DYn2
NP_001014.1|	RPS20	|RPS20|6224|P60866|40S ribosomal protein S20 isoform 2 [Homo sapiens]	KTPCGEGSK	KTPC[+333.2]GEGSK	KTPC#GEGSK	620.306	2	C70	32.03	2081278208	0.987784	DYn2
NP_001014.1|	RPS20	|RPS20|6224|P60866|40S ribosomal protein S20 isoform 2 [Homo sapiens]	KTPCGEGSK	KTPC[+333.2]GEGSK	KTPC#GEGSK	413.873	3	C70	32.03	2014162880	0.937244	DYn2
NP_006176.2|	NUMA1	|NUMA1|4926|Q14980;Q3SYK8;Q4LE64|nuclear mitotic apparatus protein 1 [Homo sapiens]	KVEELQACVETAR	KVEELQAC[+333.2]VETAR	KVEELQAC#VETAR	603.645	3	C658	51.47	160526308	-0.458603	DYn2
NP_001007.2|	RPS12	|RPS12|6206|P25398|40S ribosomal protein S12 [Homo sapiens]	KVVGCSCVVVK	KVVGC[+333.2]SC[+57]VVVK	KVVGC#SCVVVK	755.91	2	C106	46	252759480	-0.389148	DYn2
NP_005817.1|	HNRNPR	|HNRNPR|10236|O43390|heterogeneous nuclear ribonucleoprotein R isoform 2 [Homo sapiens]	LCDSYEIRPGK	LC[+333.2]DSYEIRPGK	LC#DSYEIRPGK	538.605	3	C226	49.89	247022272	-0.393469	DYn2
NP_003671.1|	YARS	|YARS|8565|P54577|tyrosine--tRNA ligase, cytoplasmic [Homo sapiens]	LGSISCK	LGSISC[+333.2]K	LGSISC#K	520.776	2	C519	48.8	403884992	-0.275346	DYn2
NP_078934.3|	IPO4	|IPO4|79711|Q8TEX9;B3KT38|importin-4 [Homo sapiens]	LLECPHLNVR	LLEC[+333.2]PHLNVR	LLEC#PHLNVR	509.61	3	C708	57.45	140406708	-0.473754	DYn2
NP_006420.1|	CCT7	|CCT7|10574|Q99832|T-complex protein 1 subunit eta isoform a [Homo sapiens]	LLEKCAMTALSSK	LLEKC[+333.2]AM[+16]TALSSK	LLEKC#AMTALSSK	872.455	2	C158	56.79	113866564	-0.493739	DYn2
NP_006420.1|	CCT7	|CCT7|10574|Q99832|T-complex protein 1 subunit eta isoform a [Homo sapiens]	LLEKCAMTALSSK	LLEKC[+333.2]AM[+16]TALSSK	LLEKC#AMTALSSK	581.972	3	C158	56.79	230850768	-0.405646	DYn2
NP_005780.2|	PSME3	|PSME3|10197|P61289|proteasome activator complex subunit 3 isoform 1 [Homo sapiens]	LLIEKCNTVK	LLIEKC[+333.2]NTVK	LLIEKC#NTVK	498.618	3	C133	50	327254344	-0.333051	DYn2
NP_002861.1|	RAB13	|RAB13|5872|P51153|ras-related protein Rab-13 [Homo sapiens]	LLLGNKCDMEAK	LLLGNKC[+333.2]DM[+16]EAK	LLLGNKC#DMEAK	842.426	2	C123	48.59	234674816	-0.402767	DYn2
NP_002861.1|	RAB13	|RAB13|5872|P51153|ras-related protein Rab-13 [Homo sapiens]	LLLGNKCDMEAK	LLLGNKC[+333.2]DM[+16]EAK	LLLGNKC#DMEAK	561.953	3	C123	48.59	760720224	-0.00663785	DYn2
NP_004152.1|	RAB1A	|RAB1A|5861|P62820;Q5U0I6|ras-related protein Rab-1A isoform 1 [Homo sapiens]	LLVGNKCDLTTK	LLVGNKC[+333.2]DLTTK	LLVGNKC#DLTTK	819.45	2	C126	54.71	410781224	-0.270153	DYn2
NP_004152.1|	RAB1A	|RAB1A|5861|P62820;Q5U0I6|ras-related protein Rab-1A isoform 1 [Homo sapiens]	LLVGNKCDLTTK	LLVGNKC[+333.2]DLTTK	LLVGNKC#DLTTK	546.636	3	C126	54.71	269427256	-0.376597	DYn2
NP_705935.1|	TPM3	|TPM3|7170|P06753|tropomyosin alpha-3 chain isoform 2 [Homo sapiens]	LMDQNLKCLSAAEEK	LM[+16]DQNLKC[+333.2]LSAAEEK	LMDQNLKC#LSAAEEK	1021.5	2	C170	52.19	193103316	-0.434071	DYn2
NP_705935.1|	TPM3	|TPM3|7170|P06753|tropomyosin alpha-3 chain isoform 2 [Homo sapiens]	LMDQNLKCLSAAEEK	LM[+16]DQNLKC[+333.2]LSAAEEK	LMDQNLKC#LSAAEEK	681.336	3	C170	52.19	1423452096	0.49242	DYn2
NP_001010.2|	RPS15A	|RPS15A|6210|P62244;B2R4W8|40S ribosomal protein S15a [Homo sapiens]	LNKCGVISPR	LNKC[+333.2]GVISPR	LNKC#GVISPR	710.392	2	C72	46.2	161539480	-0.45784	DYn2
NP_001524.2|	HNRNPL	|HNRNPL|3191|P14866;Q6NTA2|heterogeneous nuclear ribonucleoprotein L isoform a [Homo sapiens]	LNVCVSK	LNVC[+333.2]VSK	LNVC#VSK	548.297	2	C452	52.55	235205584	-0.402367	DYn2
NP_008835.5|	PRKDC	|PRKDC|5591|P78527|DNA-dependent protein kinase catalytic subunit isoform 1 [Homo sapiens]	LPVLAGCLK	LPVLAGC[+333.2]LK	LPVLAGC#LK	623.865	2	C223	67.95	29768851	-0.557067	DYn2
NP_004108.1|	FKBP5	|FKBP5|2289|Q13451;Q2TA84;Q5TGM6|peptidyl-prolyl cis-trans isomerase FKBP5 isoform 1 [Homo sapiens]	LQISMCQK	LQISM[+16]C[+333.2]QK	LQISMC#QK	650.325	2	C394	47.94	406660384	-0.273256	DYn2
NP_001070908.1|	BCLAF1	|BCLAF1|9774|Q9NYF8|bcl-2-associated transcription factor 1 isoform 2 [Homo sapiens]	LRCDSADLR	LRC[+333.2]DSADLR	LRC#DSADLR	461.235	3	C686	45.39	230049832	-0.406249	DYn2
NP_001153239.1|	BZW2	|BZW2|28969|Q9Y6E2|basic leucine zipper and W2 domain-containing protein 2 [Homo sapiens]	LSQECPIK	LSQEC[+333.2]PIK	LSQEC#PIK	625.826	2	C270	49.98	570158240	-0.150137	DYn2
NP_001307.2|	CSE1L	|CSE1L|1434|P55060|exportin-2 isoform 1 [Homo sapiens]	LSTACPGR	LSTAC[+333.2]PGR	LSTAC#PGR	569.29	2	C939	45.86	308840464	-0.346918	DYn2
NP_001017963.2|	HSP90AA1	|HSP90AA1|3320|P07900;Q86SX1|heat shock protein HSP 90-alpha isoform 1 [Homo sapiens]	LVTSPCCIVTSTYGWTANMER	LVTSPC[+333.2]C[+57]IVTSTYGWTANM[+16]ER	LVTSPC#CIVTSTYGWTANMER	913.426	3	C719	73.49	59417816	-0.534741	DYn2
NP_005498.1|	CFL1	|CFL1|1072|P23528|cofilin-1 [Homo sapiens]	MLPDKDCR	M[+16]LPDKDC[+333.2]R	MLPDKDC#R	663.813	2	C80	39.18	608290848	-0.121422	DYn2
NP_005498.1|	CFL1	|CFL1|1072|P23528|cofilin-1 [Homo sapiens]	MLPDKDCR	M[+16]LPDKDC[+333.2]R	MLPDKDC#R	442.878	3	C80	39.18	866968512	0.0733705	DYn2
NP_542784.1|	RPL10L	|RPL10L|140801|Q96L21|60S ribosomal protein L10-like [Homo sapiens]	MLSCAGADR	M[+16]LSC[+333.2]AGADR	MLSC#AGADR	636.789	2	C105	45.27	420677872	-0.262701	DYn2
NP_000652.2|	RPL9	|RPL9|6133|P32969;Q53Z07|60S ribosomal protein L9 [Homo sapiens]	MRPGVACSVSQAQK	M[+16]RPGVAC[+333.2]SVSQAQK	MRPGVAC#SVSQAQK	905.951	2	C134	41.15	455460752	-0.236508	DYn2
NP_000652.2|	RPL9	|RPL9|6133|P32969;Q53Z07|60S ribosomal protein L9 [Homo sapiens]	MRPGVACSVSQAQK	M[+16]RPGVAC[+333.2]SVSQAQK	MRPGVAC#SVSQAQK	604.303	3	C134	41.15	1701572736	0.701854	DYn2
NP_005380.2|	PCMT1	|PCMT1|5110|-|protein-L-isoaspartate(D-aspartate) O-methyltransferase isoform 1 [Homo sapiens]	MVGCTGK	MVGC[+333.2]TGK	MVGC#TGK	514.749	2	C160	43.27	254178304	1.60905	DYn2
NP_005380.2|	PCMT1	|PCMT1|5110|-|protein-L-isoaspartate(D-aspartate) O-methyltransferase isoform 1 [Homo sapiens]	MVGCTGK	M[+16]VGC[+333.2]TGK	MVGC#TGK	522.746	2	C160	39.68	2906291968	-0.38808	DYn2
NP_006799.1|	SEC61B	|SEC61B|10952|P60468|protein transport protein Sec61 subunit beta [Homo sapiens]	NASCGTR	NASC[+333.2]GTR	NASC#GTR	521.243	2	C39	33.53	1937297344	0.879362	DYn2
NP_973726.2|	SF1	|SF1|7536|Q15637|splicing factor 1 isoform 4 [Homo sapiens]	NIEKECNAK	NIEKEC[+333.2]NAK	NIEKEC#NAK	691.343	2	C171	35.41	437295824	-0.250187	DYn2
NP_003555.1|	TAGLN2	|TAGLN2|8407|P37802;E9KL39|transgelin-2 [Homo sapiens]	NMACVQR	NM[+16]AC[+333.2]VQR	NMAC#VQR	585.773	2	C124	39.65	1086893888	0.238981	DYn2
NP_003555.1|	TAGLN2	|TAGLN2|8407|P37802;E9KL39|transgelin-2 [Homo sapiens]	NMACVQR	NMAC[+333.2]VQR	NMAC#VQR	577.776	2	C124	46.2	329080336	-0.331676	DYn2
NP_006078.2|	TUBB4A	|TUBB4A|10382|P04350|tubulin beta-4A chain [Homo sapiens]	NMMAACDPR	NM[+16]M[+16]AAC[+333.2]DPR	NMMAAC#DPR	687.286	2	C303	39.86	899360832	0.0977629	DYn2
NP_001006.1|	RPS11	|RPS11|6205|P62280|40S ribosomal protein S11 [Homo sapiens]	NMSVHLSPCFR	NM[+16]SVHLSPC[+333.2]FR	NMSVHLSPC#FR	547.262	3	C116	55.7	125338852	-0.4851	DYn2
NP_004588.1|	SNRPD2	|SNRPD2|6633|P62316|small nuclear ribonucleoprotein Sm D2 isoform 1 [Homo sapiens]	NNTQVLINCR	NNTQVLINC[+333.2]R	NNTQVLINC#R	754.388	2	C46	54.74	1507922176	0.556029	DYn2
NP_004588.1|	SNRPD2	|SNRPD2|6633|P62316|small nuclear ribonucleoprotein Sm D2 isoform 1 [Homo sapiens]	NNTQVLINCR	NNTQVLINC[+333.2]R	NNTQVLINC#R	503.261	3	C46	54.74	1655628096	0.667256	DYn2
NP_031401.1|	TARDBP	|TARDBP|23435|Q13148;Q9H256|TAR DNA-binding protein 43 [Homo sapiens]	NPVSQCMR	NPVSQC[+333.2]MR	NPVSQC#MR	634.3	2	C50	48.56	50800274	-0.54123	DYn2
NP_002645.3|	PKM	|PKM|5315|P14618|pyruvate kinase isozymes M1/M2 isoform a [Homo sapiens]	NTGIICTIGPASR	NTGIIC[+333.2]TIGPASR	NTGIIC#TIGPASR	818.43	2	C49	60.86	310150484	-0.345931	DYn2
NP_002645.3|	PKM	|PKM|5315|P14618|pyruvate kinase isozymes M1/M2 isoform a [Homo sapiens]	NTGIICTIGPASR	NTGIIC[+333.2]TIGPASR	NTGIIC#TIGPASR	545.956	3	C49	60.86	238243986	-0.400079	DYn2
NP_002366.2|	MAP4	|MAP4|4134|P27816|microtubule-associated protein 4 isoform 1 [Homo sapiens]	NVCLPPEMEVALTEDQVPALK	NVC[+333.2]LPPEM[+16]EVALTEDQVPALK	NVC#LPPEMEVALTEDQVPALK	882.445	3	C535	84.71	103406780	-0.501616	DYn2
NP_733765.1|	ATP2A2	|ATP2A2|488|P16615|sarcoplasmic/endoplasmic reticulum calcium ATPase 2 isoform b [Homo sapiens]	NYLEPGKECVQPATK	NYLEPGKEC[+333.2]VQPATK	NYLEPGKEC#VQPATK	1005.5	2	C997	49.92	237111600	-0.400932	DYn2
NP_733765.1|	ATP2A2	|ATP2A2|488|P16615|sarcoplasmic/endoplasmic reticulum calcium ATPase 2 isoform b [Homo sapiens]	NYLEPGKECVQPATK	NYLEPGKEC[+333.2]VQPATK	NYLEPGKEC#VQPATK	670.672	3	C997	49.92	1399951424	0.474724	DYn2
NP_001137485.1|	RGPD3	|RGPD3|653489|A6NKT7|ranBP2-like and GRIP domain-containing protein 3 [Homo sapiens]	QLCTERQK	QLC[+333.2]TERQK	QLC#TERQK	669.845	2	C525	16.71	120526628	-0.488724	DYn2
NP_004921.1|	CAPZB	|CAPZB|832|P47756;Q7L4N0|F-actin-capping protein subunit beta isoform 1 [Homo sapiens]	QMEKDETVSDCSPHIANIGR	QM[+16]EKDETVSDC[+333.2]SPHIANIGR	QMEKDETVSDC#SPHIANIGR	860.4	3	C206	49.23	232002136	-0.404779	DYn2
NP_004921.1|	CAPZB	|CAPZB|832|P47756;Q7L4N0|F-actin-capping protein subunit beta isoform 1 [Homo sapiens]	QMEKDETVSDCSPHIANIGR	QM[+16]EKDETVSDC[+333.2]SPHIANIGR	QMEKDETVSDC#SPHIANIGR	645.552	4	C206	49.23	673132736	-0.072594	DYn2
NP_115766.3|	MKI67IP	|MKI67IP|84365|Q9BYG3|MKI67 FHA domain-interacting nucleolar phosphoprotein [Homo sapiens]	QPISCVK	QPISC[+333.2]VK	QPISC#VK	554.297	2	C269	48.58	170291332	-0.45125	DYn2
NP_005993.1|	UCHL3	|UCHL3|7347|P15374|ubiquitin carboxyl-terminal hydrolase isozyme L3 [Homo sapiens]	QTISNACGTIGLIHAIANNK	QTISNAC[+333.2]GTIGLIHAIANNK	QTISNAC#GTIGLIHAIANNK	791.418	3	C95	83.55	212541864	-0.419434	DYn2
NP_001010.2|	RPS15A	|RPS15A|6210|P62244;B2R4W8|40S ribosomal protein S15a [Homo sapiens]	QVLIRPCSK	QVLIRPC[+333.2]SK	QVLIRPC#SK	688.89	2	C30	48.29	462715648	-0.231045	DYn2
NP_001010.2|	RPS15A	|RPS15A|6210|P62244;B2R4W8|40S ribosomal protein S15a [Homo sapiens]	QVLIRPCSK	QVLIRPC[+333.2]SK	QVLIRPC#SK	459.595	3	C30	48.29	1951639232	0.890162	DYn2
NP_001230106.1|	ALDOA	|ALDOA|226|P04075|fructose-bisphosphate aldolase A isoform 2 [Homo sapiens]	RCQYVTEK	RC[+333.2]QYVTEK	RC#QYVTEK	453.896	3	C256	41.18	1413975488	0.485284	DYn2
NP_055117.1|	SEC61G	|SEC61G|23480|P60059|protein transport protein Sec61 subunit gamma [Homo sapiens]	RCTKPDR	RC[+333.2]TKPDR	RC#TKPDR	403.545	3	C25	23.69	384394352	-0.290023	DYn2
NP_006363.4|	SYNCRIP	|SYNCRIP|10492|O60506|heterogeneous nuclear ribonucleoprotein Q isoform 1 [Homo sapiens]	SAFLCGVMK	SAFLC[+333.2]GVM[+16]K	SAFLC#GVMK	652.823	2	C96	57	417969338	-0.26474	DYn2
NP_005115.2|	NUP153	|NUP153|9972|P49790|nuclear pore complex protein Nup153 [Homo sapiens]	SASVAPFTCK	SASVAPFTC[+333.2]K	SASVAPFTC#K	672.337	2	C1065	56.2	165796408	-0.454634	DYn2
NP_002038.2|	GARS	|GARS|2617|P41250|glycine--tRNA ligase precursor [Homo sapiens]	SCYDLSCHAR	SC[+333.2]YDLSC[+57]HAR	SC#YDLSCHAR	772.835	2	C466	46.63	95784104	-0.507356	DYn2
NP_002038.2|	GARS	|GARS|2617|P41250|glycine--tRNA ligase precursor [Homo sapiens]	SCYDLSCHAR	SC[+333.2]YDLSC[+57]HAR	SC#YDLSCHAR	515.559	3	C466	46.63	380119280	-0.293242	DYn2
NP_002038.2|	GARS	|GARS|2617|P41250|glycine--tRNA ligase precursor [Homo sapiens]	SCYDLSCHAR	SC[+57]YDLSC[+333.2]HAR	SCYDLSC#HAR	772.835	2	C471	46.38	209696720	-0.421576	DYn2
NP_002038.2|	GARS	|GARS|2617|P41250|glycine--tRNA ligase precursor [Homo sapiens]	SCYDLSCHAR	SC[+57]YDLSC[+333.2]HAR	SCYDLSC#HAR	515.559	3	C471	46.38	652356624	-0.0882391	DYn2
NP_001393.1|	EEF1A1	|EEF1A1|1915|P68104;Q6IPS9|elongation factor 1-alpha 1 [Homo sapiens]	SGDAAIVDMVPGKPMCVESFSDYPPLGR	SGDAAIVDM[+16]VPGKPMC[+333.2]VESFSDYPPLGR	SGDAAIVDMVPGKPMC#VESFSDYPPLGR	1096.52	3	C411	69.23	328734688	-0.331937	DYn2
NP_001393.1|	EEF1A1	|EEF1A1|1915|P68104;Q6IPS9|elongation factor 1-alpha 1 [Homo sapiens]	SGDAAIVDMVPGKPMCVESFSDYPPLGR	SGDAAIVDM[+16]VPGKPMC[+333.2]VESFSDYPPLGR	SGDAAIVDMVPGKPMC#VESFSDYPPLGR	822.641	4	C411	69.23	395655264	-0.423481	DYn2
NP_001393.1|	EEF1A1	|EEF1A1|1915|P68104;Q6IPS9|elongation factor 1-alpha 1 [Homo sapiens]	SGDAAIVDMVPGKPMCVESFSDYPPLGR	SGDAAIVDM[+16]VPGKPM[+16]C[+333.2]VESFSDYPPLGR	SGDAAIVDMVPGKPMC#VESFSDYPPLGR	1101.85	3	C411	74.2	207166760	-0.281543	DYn2
NP_000959.2|	RPL4	|RPL4|6124|P36578|60S ribosomal protein L4 [Homo sapiens]	SGQGAFGNMCR	SGQGAFGNMC[+333.2]R	SGQGAFGNMC#R	730.824	2	C96	48.83	1529452608	0.572242	DYn2
NP_000959.2|	RPL4	|RPL4|6124|P36578|60S ribosomal protein L4 [Homo sapiens]	SGQGAFGNMCR	SGQGAFGNMC[+333.2]R	SGQGAFGNMC#R	487.552	3	C96	48.83	533093616	0.143106	DYn2
NP_000959.2|	RPL4	|RPL4|6124|P36578|60S ribosomal protein L4 [Homo sapiens]	SGQGAFGNMCR	SGQGAFGNM[+16]C[+333.2]R	SGQGAFGNMC#R	738.822	2	C96	46.23	959574976	-0.178048	DYn2
NP_006421.2|	CCT4	|CCT4|10575|P50991|T-complex protein 1 subunit delta isoform a [Homo sapiens]	SIHDALCVIR	SIHDALC[+333.2]VIR	SIHDALC#VIR	487.262	3	C410	63.69	114830540	-0.493013	DYn2
NP_055140.1|	CORO1C	|CORO1C|23603|Q9ULV4|coronin-1C isoform 1 [Homo sapiens]	SIKDTICNQDER	SIKDTIC[+333.2]NQDER	SIKDTIC#NQDER	877.923	2	C456	46.76	1003023776	0.175824	DYn2
NP_055140.1|	CORO1C	|CORO1C|23603|Q9ULV4|coronin-1C isoform 1 [Homo sapiens]	SIKDTICNQDER	SIKDTIC[+333.2]NQDER	SIKDTIC#NQDER	585.617	3	C456	46.76	1953108800	0.891269	DYn2
NP_006592.3|	PTGES3	|PTGES3|10728|Q15185|prostaglandin E synthase 3 [Homo sapiens]	SILCCLR	SILC[+333.2]C[+57]LR	SILC#CLR	599.31	2	C75	62.42	281146384	-0.367772	DYn2
NP_001185771.1|	CCT2	|CCT2|10576|P78371|T-complex protein 1 subunit beta isoform 2 [Homo sapiens]	SLHDALCVLAQTVK	SLHDALC[+333.2]VLAQTVK	SLHDALC#VLAQTVK	915.993	2	C348	79.24	93643704	-0.508968	DYn2
NP_001185771.1|	CCT2	|CCT2|10576|P78371|T-complex protein 1 subunit beta isoform 2 [Homo sapiens]	SLHDALCVLAQTVK	SLHDALC[+333.2]VLAQTVK	SLHDALC#VLAQTVK	610.998	3	C348	79.24	253135304	-0.388865	DYn2
NP_060531.2|	PRPF38B	|PRPF38B|55119|Q5VTL8;Q69YH0|pre-mRNA-splicing factor 38B [Homo sapiens]	TAGQTGMCGGVR	TAGQTGM[+16]C[+333.2]GGVR	TAGQTGMC#GGVR	743.842	2	C113	39.83	173365688	-0.448934	DYn2
NP_006078.2|	TUBB4A	|TUBB4A|10382|P04350|tubulin beta-4A chain [Homo sapiens]	TAVCDIPPR	TAVC[+333.2]DIPPR	TAVC#DIPPR	652.837	2	C354	54.54	91544656	-0.510548	DYn2
NP_005264.2|	GNB2	|GNB2|2783|P62879;Q6FHM2|guanine nucleotide-binding protein G(I)/G(S)/G(T) subunit beta-2 [Homo sapiens]	TFVSGACDASIK	TFVSGAC[+333.2]DASIK	TFVSGAC#DASIK	766.377	2	C204	55.68	90856932	-0.511066	DYn2
NP_001967.3|	ENO3	|ENO3|2027|P13929;D3DTL2|beta-enolase isoform 1 [Homo sapiens]	TGAPCR	TGAPC[+333.2]R	TGAPC#R	469.232	2	C399	39	6233351168	4.11443	DYn2
NP_001022.1|	RPS28	|RPS28|6234|P62857;B2R4R9|40S ribosomal protein S28 [Homo sapiens]	TGSQGQCTQVR	TGSQGQC[+333.2]TQVR	TGSQGQC#TQVR	749.359	2	C27	38.11	845306016	0.0570579	DYn2
NP_001022.1|	RPS28	|RPS28|6234|P62857;B2R4R9|40S ribosomal protein S28 [Homo sapiens]	TGSQGQCTQVR	TGSQGQC[+333.2]TQVR	TGSQGQC#TQVR	499.909	3	C27	38.11	346696096	-0.318411	DYn2
NP_004125.3|	HSPA9	|HSPA9|3313|P38646|stress-70 protein, mitochondrial precursor [Homo sapiens]	TIAPCQK	TIAPC[+333.2]QK	TIAPC#QK	547.289	2	C366	45.82	4592313600	2.87867	DYn2
NP_004125.3|	HSPA9	|HSPA9|3313|P38646|stress-70 protein, mitochondrial precursor [Homo sapiens]	TIAPCQK	TIAPC[+333.2]QK	TIAPC#QK	365.195	3	C366	45.82	133701204	-0.478803	DYn2
NP_997195.1|	TUBA3E	|TUBA3E|112714|Q6PEY2|tubulin alpha-3E chain [Homo sapiens]	TIQFVDWCPTGFK	TIQFVDWC[+333.2]PTGFK	TIQFVDWC#PTGFK	625.643	3	C347	81.34	180187664	-0.443797	DYn2
NP_003008.1|	SRSF3	|SRSF3|6428|P84103;B2R6F3|serine/arginine-rich splicing factor 3 [Homo sapiens]	TLCGCR	TLC[+333.2]GC[+57]R	TLC#GCR	521.744	2	C72	45.71	1056232960	0.215893	DYn2
NP_005989.3|	CCT3	|CCT3|7203|P49368;B3KX11;Q59H77|T-complex protein 1 subunit gamma isoform a [Homo sapiens]	TLIQNCGASTIR	TLIQNC[+333.2]GASTIR	TLIQNC#GASTIR	805.422	2	C455	55.92	131932112	-0.480135	DYn2
NP_006089.1|	GNB2L1	|GNB2L1|10399|P63244;E9KL35|guanine nucleotide-binding protein subunit beta-2-like 1 [Homo sapiens]	TNHIGHTGYLNTVTVSPDGSLCASGGK	TNHIGHTGYLNTVTVSPDGSLC[+333.2]ASGGK	TNHIGHTGYLNTVTVSPDGSLC#ASGGK	755.62	4	C207	55.59	228739728	-0.407236	DYn2
NP_001435.1|	FABP5	|FABP5|2171|Q01469;E7DVW5|fatty acid-binding protein, epidermal [Homo sapiens]	TTQFSCTLGEK	TTQFSC[+333.2]TLGEK	TTQFSC#TLGEK	774.374	2	C67	55.12	204574308	-0.425433	DYn2
NP_001193496.1|	IFI16	|IFI16|3428|Q16666;B4DJT8;H3BLV7|gamma-interferon-inducible protein 16 isoform 1 [Homo sapiens]	TVAKCQVTPR	TVAKC[+333.2]QVTPR	TVAKC#QVTPR	718.39	2	C135	41.13	556413248	-0.160487	DYn2
NP_001193496.1|	IFI16	|IFI16|3428|Q16666;B4DJT8;H3BLV7|gamma-interferon-inducible protein 16 isoform 1 [Homo sapiens]	TVAKCQVTPR	TVAKC[+333.2]QVTPR	TVAKC#QVTPR	479.262	3	C135	41.13	1151550848	0.28767	DYn2
NP_001015.1|	RPS21	|RPS21|6227|P63220;Q6FGH5|40S ribosomal protein S21 [Homo sapiens]	TYAICGAIR	TYAIC[+333.2]GAIR	TYAIC#GAIR	650.84	2	C56	60.79	296130756	-0.356488	DYn2
NP_009191.1|	LYPLA2	|LYPLA2|11313|O95372|acyl-protein thioesterase 2 [Homo sapiens]	TYPGVMHSSCPQEMAAVK	TYPGVMHSSC[+333.2]PQEMAAVK	TYPGVMHSSC#PQEMAAVK	757.02	3	C213	49.55	182050732	-0.442394	DYn2
NP_005052.1|	RPL3L	|RPL3L|6123|Q92901|60S ribosomal protein L3-like [Homo sapiens]	VACIGAWHPAR	VAC[+333.2]IGAWHPAR	VAC#IGAWHPAR	757.39	2	C253	56.32	82573744	-0.517304	DYn2
NP_005052.1|	RPL3L	|RPL3L|6123|Q92901|60S ribosomal protein L3-like [Homo sapiens]	VACIGAWHPAR	VAC[+333.2]IGAWHPAR	VAC#IGAWHPAR	505.263	3	C253	56.32	293882288	-0.358182	DYn2
NP_005325.2|	HCFC1	|HCFC1|3054|P51610|host cell factor 1 [Homo sapiens]	VAGINACGR	VAGINAC[+333.2]GR	VAGINAC#GR	597.308	2	C1872	48.18	236035008	-0.401742	DYn2
NP_001012.1|	RPS17	|RPS17|6218|P0CW22;P08708|40S ribosomal protein S17 [Homo sapiens]	VCEEIAIIPSKK	VC[+333.2]EEIAIIPSKK	VC#EEIAIIPSKK	554.976	3	C35	56.44	466120544	-0.228481	DYn2
NP_006588.1|	HSPA8	|HSPA8|3312|P11142;Q53HF2|heat shock cognate 71 kDa protein isoform 1 [Homo sapiens]	VCNPIITK	VC[+333.2]NPIITK	VC#NPIITK	610.839	2	C603	54.49	2942593024	1.63638	DYn2
NP_788955.1|	PSME1	|PSME1|5720|Q06323;A6NJG9;Q86SZ9|proteasome activator complex subunit 1 isoform 2 [Homo sapiens]	VDVFREDLCTK	VDVFREDLC[+333.2]TK	VDVFREDLC#TK	553.28	3	C22	58.31	151914880	-0.465088	DYn2
NP_005557.1|	LDHA	|LDHA|3939|P00338|L-lactate dehydrogenase A chain isoform 1 [Homo sapiens]	VIGSGCNLDSAR	VIGSGC[+333.2]NLDSAR	VIGSGC#NLDSAR	762.877	2	C163	52.37	1427436224	0.49542	DYn2
NP_061156.1|	CMAS	|CMAS|55907|Q8NFW8|N-acylneuraminate cytidylyltransferase [Homo sapiens]	VNNSCQK	VNNSC[+333.2]QK	VNNSC#QK	563.271	2	C432	32.09	48760113	-0.542766	DYn2
NP_001967.3|	ENO3	|ENO3|2027|P13929;D3DTL2|beta-enolase isoform 1 [Homo sapiens]	VNQIGSVTESIQACK	VNQIGSVTESIQAC[+333.2]K	VNQIGSVTESIQAC#K	955.488	2	C357	62.18	378784784	-0.294247	DYn2
NP_001967.3|	ENO3	|ENO3|2027|P13929;D3DTL2|beta-enolase isoform 1 [Homo sapiens]	VNQIGSVTESIQACK	VNQIGSVTESIQAC[+333.2]K	VNQIGSVTESIQAC#K	637.328	3	C357	62.18	340090032	-0.323386	DYn2
NP_001419.1|	ENO1	|ENO1|2023|P06733|alpha-enolase isoform 1 [Homo sapiens]	VNQIGSVTESLQACK	VNQIGSVTESLQAC[+333.2]K	VNQIGSVTESLQAC#K	955.488	2	C357	62.21	443804448	-0.245285	DYn2
NP_001419.1|	ENO1	|ENO1|2023|P06733|alpha-enolase isoform 1 [Homo sapiens]	VNQIGSVTESLQACK	VNQIGSVTESLQAC[+333.2]K	VNQIGSVTESLQAC#K	637.328	3	C357	62.21	452143792	-0.239006	DYn2
NP_001007.2|	RPS12	|RPS12|6206|P25398|40S ribosomal protein S12 [Homo sapiens]	VVGCSCVVVK	VVGC[+333.2]SC[+57]VVVK	VVGC#SCVVVK	691.862	2	C106	52.65	126393038	-0.484306	DYn2
NP_001449.3|	FLNC	|FLNC|2318|Q14315;Q59H94|filamin-C isoform a [Homo sapiens]	WCNEHLK	WC[+333.2]NEHLK	WC#NEHLK	631.803	2	C46	45.55	1192889568	0.318799	DYn2
NP_001449.3|	FLNC	|FLNC|2318|Q14315;Q59H94|filamin-C isoform a [Homo sapiens]	WCNEHLK	WC[+333.2]NEHLK	WC#NEHLK	421.538	3	C46	45.55	1672430720	0.679909	DYn2
NP_000958.1|	RPL3	|RPL3|6122|P39023|60S ribosomal protein L3 isoform a [Homo sapiens]	YCQVIR	YC[+333.2]QVIR	YC#QVIR	557.789	2	C157	52.46	372802296	-0.298752	DYn2
NP_078938.2|	NAT10	|NAT10|55226|Q9H0A0|N-acetyltransferase 10 isoform a [Homo sapiens]	YCYYNETHK	YC[+333.2]YYNETHK	YC#YYNETHK	777.34	2	C105	47.86	86999622	-0.513971	DYn2
NP_078938.2|	NAT10	|NAT10|55226|Q9H0A0|N-acetyltransferase 10 isoform a [Homo sapiens]	YCYYNETHK	YC[+333.2]YYNETHK	YC#YYNETHK	518.562	3	C105	47.86	326287496	-0.333779	DYn2
NP_003397.1|	YWHAZ	|YWHAZ|7534|P63104;D0PNI1|14-3-3 protein zeta/delta [Homo sapiens]	YDDMAACMK	YDDM[+16]AAC[+333.2]M[+16]K	YDDMAAC#MK	706.78	2	C25	40.83	151302056	-0.465549	DYn2
NP_006817.1|	YWHAQ	|YWHAQ|10971|P27348|14-3-3 protein theta [Homo sapiens]	YLAEVACGDDRK	YLAEVAC[+333.2]GDDRK	YLAEVAC#GDDRK	836.904	2	C134	49.12	630385696	-0.104784	DYn2
NP_006817.1|	YWHAQ	|YWHAQ|10971|P27348|14-3-3 protein theta [Homo sapiens]	YLAEVACGDDRK	YLAEVAC[+333.2]GDDRK	YLAEVAC#GDDRK	558.271	3	C134	49.12	1659864768	0.670446	DYn2
NP_065393.1|	RTN4	|RTN4|57142|Q9NQC3;Q8IUA4|reticulon-4 isoform A [Homo sapiens]	YSNSALGHVNCTIK	YSNSALGHVNC[+333.2]TIK	YSNSALGHVNC#TIK	920.457	2	C1101	51.23	392258048	-0.284102	DYn2
NP_065393.1|	RTN4	|RTN4|57142|Q9NQC3;Q8IUA4|reticulon-4 isoform A [Homo sapiens]	YSNSALGHVNCTIK	YSNSALGHVNC[+333.2]TIK	YSNSALGHVNC#TIK	613.973	3	C1101	51.23	1488870336	0.541682	DYn2
NP_005557.1|	LDHA	|LDHA|3939|P00338|L-lactate dehydrogenase A chain isoform 1 [Homo sapiens]	YSPNCK	YSPNC[+333.2]K	YSPNC#K	522.745	2	C131	39.68	1702429952	0.702499	DYn2
NP_002379.3|	MCM3	|MCM3|4172|-|DNA replication licensing factor MCM3 isoform 1 [Homo sapiens]	YVLCTAPR	YVLC[+333.2]TAPR	YVLC#TAPR	628.329	2	C405	55.53	266179544	-0.379043	DYn2
NP_002795.2|	PSMC3	|PSMC3|5702|P17980|26S protease regulatory subunit 6A [Homo sapiens]	ACAAQTK	AC[+334.2]AAQTK	AC#AAQTK	513.755	2	C240	26.63	238983712	-0.207476	PRD
NP_006387.1|	SSSCA1	|SSSCA1|10534|O60232|Sjoegren syndrome/scleroderma autoantigen 1 [Homo sapiens]	ACAEALR	AC[+334.2]AEALR	AC#AEALR	534.269	2	C187	37.62	121948311	-0.223113	PRD
NP_000282.1|	PGK1	|PGK1|5230|P00558;A8K4W6|phosphoglycerate kinase 1 [Homo sapiens]	ACANPAAGSVILLENLR	AC[+334.2]ANPAAGSVILLENLR	AC#ANPAAGSVILLENLR	1023.54	2	C108	74.68	182077472	-0.215079	PRD
NP_000282.1|	PGK1	|PGK1|5230|P00558;A8K4W6|phosphoglycerate kinase 1 [Homo sapiens]	ACANPAAGSVILLENLR	AC[+334.2]ANPAAGSVILLENLR	AC#ANPAAGSVILLENLR	682.698	3	C108	74.68	234075008	-0.208132	PRD
NP_001247435.1|	RPS3	|RPS3|6188|-|40S ribosomal protein S3 isoform 2 [Homo sapiens]	ACYGVLR	AC[+334.2]YGVLR	AC#YGVLR	558.287	2	C135	47.78	2220415744	0.0572593	PRD
XP_001129774.3|	LOC650157	|LOC650157|650157|-|PREDICTED: peptidyl-prolyl cis-trans isomerase A-like [Homo sapiens]	AGPNTNGSQFFICTAK	AGPNTNGSQFFIC[+334.2]TAK	AGPNTNGSQFFIC#TAK	995.478	2	C145	55.96	231034792	-0.208538	PRD
NP_001447.2|	FLNA	|FLNA|2316|P21333;Q60FE5;Q6NXF2|filamin-A isoform 1 [Homo sapiens]	AHVVPCFDASK	AHVVPC[+334.2]FDASK	AHVVPC#FDASK	754.372	2	C1157	46.28	379071296	-0.188759	PRD
NP_000843.1|	GSTP1	|GSTP1|2950|P09211|glutathione S-transferase P [Homo sapiens]	ASCLYGQLPK	ASC[+334.2]LYGQLPK	ASC#LYGQLPK	707.363	2	C48	54.63	856948896	-0.124911	PRD
NP_005498.1|	CFL1	|CFL1|1072|P23528|cofilin-1 [Homo sapiens]	AVLFCLSEDKK	AVLFC[+334.2]LSEDKK	AVLFC#LSEDKK	793.916	2	C39	54.32	837236032	-0.127545	PRD
NP_005498.1|	CFL1	|CFL1|1072|P23528|cofilin-1 [Homo sapiens]	AVLFCLSEDKK	AVLFC[+334.2]LSEDKK	AVLFC#LSEDKK	529.613	3	C39	54.32	1703571200	-0.0117952	PRD
NP_005611.1|	S100A11	|S100A11|6282|P31949|protein S100-A11 [Homo sapiens]	CIESLIAVFQK	C[+334.2]IESLIAVFQK	C#IESLIAVFQK	792.926	2	C13	95.03	3097562	-0.238992	PRD
NP_031381.2|	HSP90AB1	|HSP90AB1|3326|P08238|heat shock protein HSP 90-beta [Homo sapiens]	CLELFSELAEDKENYKK	C[+334.2]LELFSELAEDKENYKK	C#LELFSELAEDKENYKK	798.395	3	C412	82.04	123146120	-0.222953	PRD
NP_001017963.2|	HSP90AA1	|HSP90AA1|3320|P07900;Q86SX1|heat shock protein HSP 90-alpha isoform 1 [Homo sapiens]	CLELFTELAEDKENYKK	C[+334.2]LELFTELAEDKENYKK	C#LELFTELAEDKENYKK	803.067	3	C542	71.12	278238712	-0.202231	PRD
NP_005013.1|	PFN1	|PFN1|5216|P07737;Q53Y44|profilin-1 [Homo sapiens]	CYEMASHLR	C[+334.2]YEMASHLR	C#YEMASHLR	722.329	2	C128	47.19	239175856	-0.20745	PRD
NP_001129064.1|	RPS27A	|RPS27A|6233|P62979;B2RDW1|ubiquitin-40S ribosomal protein S27a precursor [Homo sapiens]	CCLTYCFNKPEDK	C[+57]C[+334.2]LTYC[+57]FNKPEDK	CC#LTYCFNKPEDK	671.295	3	C145	50.27	237129344	-0.207724	PRD
NP_001393.1|	EEF1A1	|EEF1A1|1915|P68104;Q6IPS9|elongation factor 1-alpha 1 [Homo sapiens]	DGNASGTTLLEALDCILPPTRPTDKPLR	DGNASGTTLLEALDC[+334.2]ILPPTRPTDKPLR	DGNASGTTLLEALDC#ILPPTRPTDKPLR	825.433	4	C234	80.98	397743808	-0.186264	PRD
NP_003397.1|	YWHAZ	|YWHAZ|7534|P63104;D0PNI1|14-3-3 protein zeta/delta [Homo sapiens]	DICNDVLSLLEK	DIC[+334.2]NDVLSLLEK	DIC#NDVLSLLEK	848.435	2	C94	91.2	65508636	-0.230653	PRD
NP_002296.1|	LGALS1	|LGALS1|3956|P09382|galectin-1 [Homo sapiens]	DSNNLCLHFNPR	DSNNLC[+334.2]LHFNPR	DSNNLC#LHFNPR	588.614	3	C43	52.96	259750712	-0.204701	PRD
NP_006078.2|	TUBB4A	|TUBB4A|10382|P04350|tubulin beta-4A chain [Homo sapiens]	EIVHLQAGQCGNQIGAK	EIVHLQAGQC[+334.2]GNQIGAK	EIVHLQAGQC#GNQIGAK	700.693	3	C12	44.64	125490840	-0.222639	PRD
NP_998776.1|	SLC25A3	|SLC25A3|5250|Q00325;Q6MZF9|phosphate carrier protein, mitochondrial isoform b precursor [Homo sapiens]	FACFER	FAC[+334.2]FER	FAC#FER	553.758	2	C236	49.29	235661400	-0.20792	PRD
NP_000282.1|	PGK1	|PGK1|5230|P00558;A8K4W6|phosphoglycerate kinase 1 [Homo sapiens]	FCLDNGAK	FC[+334.2]LDNGAK	FC#LDNGAK	601.287	2	C50	49.25	616782464	-0.156999	PRD
NP_003741.1|	EIF3A	|EIF3A|8661|Q14152|eukaryotic translation initiation factor 3 subunit A [Homo sapiens]	FCLQYTR	FC[+334.2]LQYTR	FC#LQYTR	632.811	2	C185	53.05	343478304	-0.193514	PRD
NP_942127.1|	ACLY	|ACLY|47|P53396|ATP-citrate synthase isoform 2 [Homo sapiens]	FICTTSAIQNR	FIC[+334.2]TTSAIQNR	FIC#TTSAIQNR	794.401	2	C20	48.98	1236823488	-0.0741564	PRD
NP_942127.1|	ACLY	|ACLY|47|P53396|ATP-citrate synthase isoform 2 [Homo sapiens]	FICTTSAIQNR	FIC[+334.2]TTSAIQNR	FIC#TTSAIQNR	529.936	3	C20	48.98	275127184	-0.202647	PRD
NP_003355.1|	UPP1	|UPP1|7378|Q16831|uridine phosphorylase 1 [Homo sapiens]	FVCVGGSPSR	FVC[+334.2]VGGSPSR	FVC#VGGSPSR	671.832	2	C57	44.67	246356800	-0.206491	PRD
NP_001155238.1|	AHCY	|AHCY|191|P23526;B3KUN3;F5H737|adenosylhomocysteinase isoform 2 [Homo sapiens]	GCAQALR	GC[+334.2]AQALR	GC#AQALR	526.769	2	C200	35.29	498622672	-0.172786	PRD
NP_000970.1|	RPL18	|RPL18|6141|Q07020|60S ribosomal protein L18 isoform 1 [Homo sapiens]	GCGTVLLSGPR	GC[+334.2]GTVLLSGPR	GC#GTVLLSGPR	697.366	2	C134	51.57	396121600	-0.186481	PRD
NP_002943.2|	RPS2	|RPS2|6187|P15880|40S ribosomal protein S2 [Homo sapiens]	GCTATLGNFAK	GC[+334.2]TATLGNFAK	GC#TATLGNFAK	708.851	2	C229	50.42	1959802240	0.0224393	PRD
NP_000958.1|	RPL3	|RPL3|6122|P39023|60S ribosomal protein L3 isoform a [Homo sapiens]	GCVVGTK	GC[+334.2]VVGTK	GC#VVGTK	499.26	2	C336	42.38	571480640	-0.163052	PRD
NP_001018146.1|	NME1-NME2	|NME1-NME2|654364|P22392|NME1-NME2 protein [Homo sapiens]	GDFCIQVGR	GDFC[+334.2]IQVGR	GDFC#IQVGR	664.824	2	C109	55.68	130094304	-0.222024	PRD
NP_001003810.1|	HNRNPD	|HNRNPD|3184|Q14103|heterogeneous nuclear ribonucleoprotein D0 isoform d [Homo sapiens]	GFCFITFK	GFC[+334.2]FITFK	GFC#FITFK	648.826	2	C207	77.12	151270232	-0.219195	PRD
NP_009193.2|	PARK7	|PARK7|11315|Q99497|protein DJ-1 [Homo sapiens]	GLIAAICAGPTALLAHEIGFGSK	GLIAAIC[+334.2]AGPTALLAHEIGFGSK	GLIAAIC#AGPTALLAHEIGFGSK	848.793	3	C106	85.72	297555184	-0.19965	PRD
NP_009193.2|	PARK7	|PARK7|11315|Q99497|protein DJ-1 [Homo sapiens]	GLIAAICAGPTALLAHEIGFGSK	GLIAAIC[+334.2]AGPTALLAHEIGFGSK	GLIAAIC#AGPTALLAHEIGFGSK	636.847	4	C106	85.72	97564456	-0.226371	PRD
NP_005498.1|	CFL1	|CFL1|1072|P23528|cofilin-1 [Homo sapiens]	HELQANCYEEVKDR	HELQANC[+334.2]YEEVKDR	HELQANC#YEEVKDR	517.744	4	C139	36.94	308232400	-0.198224	PRD
NP_001185771.1|	CCT2	|CCT2|10576|P78371|T-complex protein 1 subunit beta isoform 2 [Homo sapiens]	HGINCFINR	HGINC[+334.2]FINR	HGINC#FINR	469.903	3	C242	49.5	120578612	-0.223296	PRD
NP_000966.2|	RPL11	|RPL11|6135|P62913;Q5VVD0|60S ribosomal protein L11 isoform 1 [Homo sapiens]	IAVHCTVR	IAVHC[+334.2]TVR	IAVHC#TVR	411.557	3	C72	36.31	197500616	-0.213018	PRD
NP_002037.2|	GAPDH	|GAPDH|2597|P04406|glyceraldehyde-3-phosphate dehydrogenase isoform 1 [Homo sapiens]	IISNASCTTNCLAPLAK	IISNASC[+334.2]TTNC[+57]LAPLAK	IISNASC#TTNCLAPLAK	1056.03	2	C152	54.2	41336776704	5.28352	PRD
NP_002037.2|	GAPDH	|GAPDH|2597|P04406|glyceraldehyde-3-phosphate dehydrogenase isoform 1 [Homo sapiens]	IISNASCTTNCLAPLAK	IISNASC[+334.2]TTNC[+57]LAPLAK	IISNASC#TTNCLAPLAK	704.359	3	C152	54.2	53007681536	6.84284	PRD
NP_031381.2|	HSP90AB1	|HSP90AB1|3326|P08238|heat shock protein HSP 90-beta [Homo sapiens]	KCLELFSELAEDKENYKK	KC[+334.2]LELFSELAEDKENYKK	KC#LELFSELAEDKENYKK	631.072	4	C412	55.05	108563772	-0.224901	PRD
NP_001015.1|	RPS21	|RPS21|6227|P63220;Q6FGH5|40S ribosomal protein S21 [Homo sapiens]	KCSASNR	KC[+334.2]SASNR	KC#SASNR	550.269	2	C17	14.66	250905952	-0.205883	PRD
NP_001014.1|	RPS20	|RPS20|6224|P60866|40S ribosomal protein S20 isoform 2 [Homo sapiens]	KTPCGEGSK	KTPC[+334.2]GEGSK	KTPC#GEGSK	620.803	2	C70	22.14	195569144	-0.213276	PRD
NP_009027.1|	CLTA	|CLTA|1211|P09496|clathrin light chain A isoform b [Homo sapiens]	LCDFNPK	LC[+334.2]DFNPK	LC#DFNPK	585.784	2	C218	47.27	119061344	-0.223498	PRD
NP_006380.1|	HYOU1	|HYOU1|10525|Q9Y4L1;Q6IN67|hypoxia up-regulated protein 1 precursor [Homo sapiens]	LCQGLFFR	LC[+334.2]QGLFFR	LC#QGLFFR	659.342	2	C805	63.48	168509448	-0.216892	PRD
NP_001605.1|	ACTG1	|ACTG1|71|P63261|actin, cytoplasmic 2 [Homo sapiens]	LCYVALDFEQEMATAASSSSLEK	LC[+334.2]YVALDFEQEMATAASSSSLEK	LC#YVALDFEQEMATAASSSSLEK	943.11	3	C217	85.84	123785656	-0.209391	PRD
NP_001605.1|	ACTG1	|ACTG1|71|P63261|actin, cytoplasmic 2 [Homo sapiens]	LCYVALDFEQEMATAASSSSLEK	LC[+334.2]YVALDFEQEM[+16]ATAASSSSLEK	LC#YVALDFEQEMATAASSSSLEK	948.442	3	C217	79.98	224646704	-0.222867	PRD
NP_002406.1|	MIF	|MIF|4282|P14174|macrophage migration inhibitory factor [Homo sapiens]	LLCGLLAER	LLC[+334.2]GLLAER	LLC#GLLAER	661.368	2	C81	66.04	851484576	-0.125641	PRD
NP_002128.1|	HNRNPA2B1	|HNRNPA2B1|3181|P22626|heterogeneous nuclear ribonucleoproteins A2/B1 isoform A2 [Homo sapiens]	LTDCVVMR	LTDC[+334.2]VVMR	LTDC#VVMR	635.818	2	C38	52.08	140051008	-0.220694	PRD
NP_001021.1|	RPS27	|RPS27|6232|P42677;Q5T4L6|40S ribosomal protein S27 [Homo sapiens]	LTEGCSFR	LTEGC[+334.2]SFR	LTEGC#SFR	623.798	2	C77	43.4	316391808	-0.197133	PRD
NP_001139281.1|	MYH14	|MYH14|79784|Q7Z406;A1L2Z2;B3KWH4|myosin-14 isoform 3 [Homo sapiens]	NCAAYLK	NC[+334.2]AAYLK	NC#AAYLK	558.779	2	C881	43.62	965342432	-0.110428	PRD
NP_690601.1|	ARPC2	|ARPC2|10109|O15144;Q53R19|actin-related protein 2/3 complex subunit 2 [Homo sapiens]	NCFASVFEK	NC[+334.2]FASVFEK	NC#FASVFEK	689.827	2	C120	63.59	533862912	-0.168078	PRD
NP_942127.1|	ACLY	|ACLY|47|P53396|ATP-citrate synthase isoform 2 [Homo sapiens]	NCGSFTR	NC[+334.2]GSFTR	NC#GSFTR	559.756	2	C1030	36.85	433430496	-0.181496	PRD
NP_001003.1|	RPS8	|RPS8|6202|P62241;Q5JR94|40S ribosomal protein S8 [Homo sapiens]	NCIVLIDSTPYR	NC[+334.2]IVLIDSTPYR	NC#IVLIDSTPYR	864.443	2	C100	66.12	227528744	-0.209006	PRD
NP_003900.1|	CPNE3	|CPNE3|8895|O75131;Q05DL8|copine-3 [Homo sapiens]	NCLNPQFSK	NC[+334.2]LNPQFSK	NC#LNPQFSK	692.838	2	C54	47.34	326015312	-0.195848	PRD
NP_000997.1|	RPS3A	|RPS3A|6189|P61247|40S ribosomal protein S3a isoform 1 [Homo sapiens]	NCLTNFHGMDLTR	NC[+334.2]LTNFHGMDLTR	NC#LTNFHGMDLTR	928.433	2	C96	59.63	415130912	-0.183941	PRD
NP_000997.1|	RPS3A	|RPS3A|6189|P61247|40S ribosomal protein S3a isoform 1 [Homo sapiens]	NCLTNFHGMDLTR	NC[+334.2]LTNFHGMDLTR	NC#LTNFHGMDLTR	619.291	3	C96	59.63	1277424064	-0.0687319	PRD
NP_000997.1|	RPS3A	|RPS3A|6189|P61247|40S ribosomal protein S3a isoform 1 [Homo sapiens]	NCLTNFHGMDLTR	NC[+334.2]LTNFHGM[+16]DLTR	NC#LTNFHGMDLTR	624.622	3	C96	51.33	387279648	-0.187662	PRD
NP_001598.1|	ACAA1	|ACAA1|30|P09110|3-ketoacyl-CoA thiolase, peroxisomal isoform a [Homo sapiens]	QCSSGLQAVASIAGGIR	QC[+334.2]SSGLQAVASIAGGIR	QC#SSGLQAVASIAGGIR	976.505	2	C123	67.85	73493876	-0.229587	PRD
NP_001598.1|	ACAA1	|ACAA1|30|P09110|3-ketoacyl-CoA thiolase, peroxisomal isoform a [Homo sapiens]	QCSSGLQAVASIAGGIR	QC[+334.2]SSGLQAVASIAGGIR	QC#SSGLQAVASIAGGIR	651.339	3	C123	67.85	51170710	-0.232569	PRD
NP_001348.2|	DHX9	|DHX9|1660|Q08211;B3KU66|ATP-dependent RNA helicase A [Homo sapiens]	SCGYSVR	SC[+334.2]GYSVR	SC#GYSVR	553.258	2	C469	37.19	917059520	-0.116879	PRD
NP_004437.2|	EPRS	|EPRS|2058|P07814|bifunctional glutamate/proline--tRNA ligase [Homo sapiens]	SCQFVAVR	SC[+334.2]QFVAVR	SC#QFVAVR	622.316	2	C1377	49.08	508041344	-0.171528	PRD
NP_001393.1|	EEF1A1	|EEF1A1|1915|P68104;Q6IPS9|elongation factor 1-alpha 1 [Homo sapiens]	SGDAAIVDMVPGKPMCVESFSDYPPLGR	SGDAAIVDM[+16]VPGKPM[+16]C[+334.2]VESFSDYPPLGR	SGDAAIVDMVPGKPMC#VESFSDYPPLGR	1102.18	3	C411	64.5	412183632	-0.184335	PRD
NP_006817.1|	YWHAQ	|YWHAQ|10971|P27348|14-3-3 protein theta [Homo sapiens]	SICTTVLELLDK	SIC[+334.2]TTVLELLDK	SIC#TTVLELLDK	834.947	2	C94	90.7	99042768	-0.226173	PRD
NP_001185771.1|	CCT2	|CCT2|10576|P78371|T-complex protein 1 subunit beta isoform 2 [Homo sapiens]	SLHDALCVLAQTVK	SLHDALC[+334.2]VLAQTVK	SLHDALC#VLAQTVK	611.329	3	C348	71.75	86283588	-0.227878	PRD
NP_006420.1|	CCT7	|CCT7|10574|Q99832|T-complex protein 1 subunit eta isoform a [Homo sapiens]	TCTFILR	TC[+334.2]TFILR	TC#TFILR	594.316	2	C370	56.49	625015008	-0.155899	PRD
NP_001952.1|	EEF2	|EEF2|1938|P13639|elongation factor 2 [Homo sapiens]	TFCQLILDPIFK	TFC[+334.2]QLILDPIFK	TFC#QLILDPIFK	886.476	2	C290	87.23	243778456	-0.206835	PRD
NP_001952.1|	EEF2	|EEF2|1938|P13639|elongation factor 2 [Homo sapiens]	TFCQLILDPIFK	TFC[+334.2]QLILDPIFK	TFC#QLILDPIFK	591.32	3	C290	87.23	29380955	-0.23548	PRD
NP_001022.1|	RPS28	|RPS28|6234|P62857;B2R4R9|40S ribosomal protein S28 [Homo sapiens]	TGSQGQCTQVR	TGSQGQC[+334.2]TQVR	TGSQGQC#TQVR	749.857	2	C27	28.38	650311648	-0.152519	PRD
NP_004125.3|	HSPA9	|HSPA9|3313|P38646|stress-70 protein, mitochondrial precursor [Homo sapiens]	TIAPCQK	TIAPC[+334.2]QK	TIAPC#QK	547.787	2	C366	35.75	451982416	-0.179017	PRD
NP_001435.1|	FABP5	|FABP5|2171|Q01469;E7DVW5|fatty acid-binding protein, epidermal [Homo sapiens]	TTQFSCTLGEK	TTQFSC[+334.2]TLGEK	TTQFSC#TLGEK	774.872	2	C67	47.19	526037936	-0.169123	PRD
NP_001012.1|	RPS17	|RPS17|6218|P0CW22;P08708|40S ribosomal protein S17 [Homo sapiens]	VCEEIAIIPSKK	VC[+334.2]EEIAIIPSKK	VC#EEIAIIPSKK	832.458	2	C35	49.85	140823512	-0.220591	PRD
NP_006588.1|	HSPA8	|HSPA8|3312|P11142;Q53HF2|heat shock cognate 71 kDa protein isoform 1 [Homo sapiens]	VCNPIITK	VC[+334.2]NPIITK	VC#NPIITK	611.337	2	C603	46.51	15408112128	1.81924	PRD
NP_006588.1|	HSPA8	|HSPA8|3312|P11142;Q53HF2|heat shock cognate 71 kDa protein isoform 1 [Homo sapiens]	VCNPIITK	VC[+334.2]NPIITK	VC#NPIITK	407.894	3	C603	46.51	538880832	-0.167407	PRD
NP_004125.3|	HSPA9	|HSPA9|3313|P38646|stress-70 protein, mitochondrial precursor [Homo sapiens]	VCQGER	VC[+334.2]QGER	VC#QGER	513.245	2	C487	26.06	1143990816	-0.0865596	PRD
NP_005557.1|	LDHA	|LDHA|3939|P00338|L-lactate dehydrogenase A chain isoform 1 [Homo sapiens]	VIGSGCNLDSAR	VIGSGC[+334.2]NLDSAR	VIGSGC#NLDSAR	763.375	2	C163	43.68	472473488	-0.17628	PRD
NP_004081.1|	DUSP3	|DUSP3|1845|P51452|dual specificity protein phosphatase 3 [Homo sapiens]	VLVHCR	VLVHC[+334.2]R	VLVHC#R	530.79	2	C124	33.52	705306592	-0.145171	PRD
NP_002037.2|	GAPDH	|GAPDH|2597|P04406|glyceraldehyde-3-phosphate dehydrogenase isoform 1 [Homo sapiens]	VPTANVSVVDLTCR	VPTANVSVVDLTC[+334.2]R	VPTANVSVVDLTC#R	904.472	2	C247	60.03	383785520	-0.188129	PRD
NP_002037.2|	GAPDH	|GAPDH|2597|P04406|glyceraldehyde-3-phosphate dehydrogenase isoform 1 [Homo sapiens]	VPTANVSVVDLTCR	VPTANVSVVDLTC[+334.2]R	VPTANVSVVDLTC#R	603.317	3	C247	60.03	447159280	-0.179662	PRD
NP_001449.3|	FLNC	|FLNC|2318|Q14315;Q59H94|filamin-C isoform a [Homo sapiens]	WCNEHLK	WC[+334.2]NEHLK	WC#NEHLK	632.301	2	C46	37.04	360021376	-0.191304	PRD
NP_000958.1|	RPL3	|RPL3|6122|P39023|60S ribosomal protein L3 isoform a [Homo sapiens]	YCQVIR	YC[+334.2]QVIR	YC#QVIR	558.287	2	C157	43.61	4185049984	0.31975	PRD
NP_001129166.1|	VDAC3	|VDAC3|7419|Q9Y277|voltage-dependent anion-selective channel protein 3 isoform 2 [Homo sapiens]	YMLDCR	YMLDC[+334.2]R	YMLDC#R	567.757	2	C230	47.35	185150704	-0.214668	PRD
NP_005969.1|	S100A2	|S100A2|6273|P29034|protein S100-A2 [Homo sapiens]	YSCQEGDKFK	YSC[+334.2]QEGDKFK	YSC#QEGDKFK	769.851	2	C21	35.65	170398224	-0.216639	PRD
NP_005969.1|	S100A2	|S100A2|6273|P29034|protein S100-A2 [Homo sapiens]	YSCQEGDKFK	YSC[+334.2]QEGDKFK	YSC#QEGDKFK	513.57	3	C21	35.65	289924080	-0.20067	PRD
NP_002818.1|	PTPN1	|PTPN1|5770|P18031;A8K3M3|tyrosine-protein phosphatase non-receptor type 1 [Homo sapiens]	ESGSLSPEHGPVVVHCSAGIGR	ESGSLSPEHGPVVVHC[+320.1]SAGIGR	ESGSLSPEHGPVVVHC#SAGIGR	832.408	3	C215	45.99	1570565824	-0.132789	PYD
NP_002818.1|	PTPN1	|PTPN1|5770|P18031;A8K3M3|tyrosine-protein phosphatase non-receptor type 1 [Homo sapiens]	ESGSLSPEHGPVVVHCSAGIGR	ESGSLSPEHGPVVVHC[+320.1]SAGIGR	ESGSLSPEHGPVVVHC#SAGIGR	624.558	4	C215	45.99	2924411904	0.0152608	PYD
NP_055140.1|	CORO1C	|CORO1C|23603|Q9ULV4|coronin-1C isoform 1 [Homo sapiens]	KCDLISIPK	KC[+320.1]DLISIPK	KC#DLISIPK	446.248	3	C420	53.07	1116892288	0.00118516	PYD
NP_821133.1|	TUBB	|TUBB|203068|P07437;Q5SU16|tubulin beta chain [Homo sapiens]	EIVHIQAGQCGNQIGAK	EIVHIQAGQC[+320.1]GNQIGAK	EIVHIQAGQC#GNQIGAK	696.021	3	C12	46.07	446539568	-0.211397	PYD
NP_004081.1|	DUSP3	|DUSP3|1845|P51452|dual specificity protein phosphatase 3 [Homo sapiens]	VLVHCR	VLVHC[+320.1]R	VLVHC#R	523.782	2	C124	34.77	335325184	-0.10447	PYD
NP_005013.1|	PFN1	|PFN1|5216|P07737;Q53Y44|profilin-1 [Homo sapiens]	KCYEMASHLR	KC[+320.1]YEM[+16]ASHLR	KC#YEMASHLR	525.247	3	C128	34.39	139562832	0.168317	PYD
NP_003791.3|	RNGTT	|RNGTT|8732|O60942|mRNA-capping enzyme [Homo sapiens]	NPPELIGVHCTHGFNR	NPPELIGVHC[+320.1]THGFNR	NPPELIGVHC#THGFNR	704.346	3	C126	49.3	262146928	-0.198339	PYD
NP_003791.3|	RNGTT	|RNGTT|8732|O60942|mRNA-capping enzyme [Homo sapiens]	NPPELIGVHCTHGFNR	NPPELIGVHC[+320.1]THGFNR	NPPELIGVHC#THGFNR	528.511	4	C126	49.3	432179824	-0.168679	PYD
NP_001230106.1|	ALDOA	|ALDOA|226|P04075|fructose-bisphosphate aldolase A isoform 2 [Homo sapiens]	RCQYVTEK	RC[+320.1]QYVTEK	RC#QYVTEK	449.556	3	C256	34.14	310212048	0.439931	PYD
NP_001193496.1|	IFI16	|IFI16|3428|Q16666;B4DJT8;H3BLV7|gamma-interferon-inducible protein 16 isoform 1 [Homo sapiens]	TVAKCQVTPR	TVAKC[+320.1]QVTPR	TVAKC#QVTPR	711.88	2	C135	34.16	22305031	-0.140509	PYD
NP_001193496.1|	IFI16	|IFI16|3428|Q16666;B4DJT8;H3BLV7|gamma-interferon-inducible protein 16 isoform 1 [Homo sapiens]	TVAKCQVTPR	TVAKC[+320.1]QVTPR	TVAKC#QVTPR	474.922	3	C135	34.16	238624320	-0.10443	PYD
[truncated: 170 more rows]
